# Supplementary material
Source: publisher site journal article supplement (https://www.spandidos-publications.com/4762/downloadSupplementary)
Supplement: Supplementary file 1 [file downloadSupplementary]

## Sheet: Supplementary Table SI
Table SI. Tissue RNA expression matrix for patients with tuberous sclerosis complex-associated renal angiomyolipoma.
gene_id	Tumor 1	Tumor 2	Tumor 3	Tumor 4	Tumor 5	Tumor 6	Tumor 7	Tumor 8	Tumor 9	Tumor 10	Normal 1	Normal 3	Normal 10	Normal 9	Normal 8	Normal 2	Normal 5	Normal 7	gene_name	gene_chr	gene_start	gene_end	gene_strand	gene_length	gene_biotype	gene_description	tf_family
ENSG00000198804	85328.4	46383.7	41010.4	73936.3	63541.7	140590	26466.1	29881	60153.2	23640.8	26770.5	12841.7	61025.1	22910.5	32440.7	24943.5	37960.6	51396.6	MT-CO1	MT	5904	7445	+	1542	protein_coding	mitochondrially encoded cytochrome c oxidase I [Source:HGNC Symbol;Acc:HGNC:7419]	-
ENSG00000198938	54237	32919.7	30520	65361.2	43897	73719.9	21266.7	27439.3	46538.6	16181.7	21282.8	8972.54	54901.2	15810.8	26411.3	33972.5	33950.2	43837.9	MT-CO3	MT	9207	9990	+	784	protein_coding	mitochondrially encoded cytochrome c oxidase III [Source:HGNC Symbol;Acc:HGNC:7422]	-
ENSG00000198840	49356.8	28819.8	25684.3	19644.5	53157	45139.5	17096.9	21284.1	19355.5	14324	24390.9	7315.07	60201.3	11139.1	22323.5	28992.5	33062	25207.3	MT-ND3	MT	10059	10404	+	346	protein_coding	mitochondrially encoded NADH:ubiquinone oxidoreductase core subunit 3 [Source:HGNC Symbol;Acc:HGNC:7458]	-
ENSG00000198899	44339	26144.1	22113.7	41856.8	42449.6	50957.4	15861.4	16516.4	27526.3	13287.2	16705.7	5907.58	35009.2	9821.05	16178.7	18665.8	22410.2	27645.2	MT-ATP6	MT	8527	9207	+	681	protein_coding	mitochondrially encoded ATP synthase membrane subunit 6 [Source:HGNC Symbol;Acc:HGNC:7414]	-
ENSG00000198712	41363.5	25175.9	21807.5	36014.3	31622.8	53728	17031.2	16020.3	28143.1	13365.5	14745.7	6212.03	38118.6	11317.5	15575.2	18131.2	22999.5	28805.6	MT-CO2	MT	7586	8269	+	684	protein_coding	mitochondrially encoded cytochrome c oxidase II [Source:HGNC Symbol;Acc:HGNC:7421]	-
ENSG00000210082	38800.1	17629.3	15680.9	38235.5	32254.1	47320.1	8129.18	14115.9	25791.7	6760.11	21763.8	6350.86	27251.9	8102.14	16014.2	14314.6	21133.6	18547.8	MT-RNR2	MT	1671	3229	+	1559	Mt_rRNA	mitochondrially encoded 16S RNA [Source:HGNC Symbol;Acc:HGNC:7471]	-
ENSG00000198886	28353.3	17969.4	15839.9	27215.1	30140.5	37640.5	13285.3	13267.1	22986.6	8605.3	10842.4	3911.46	26079.5	7728.48	13089.5	10998	18329.8	25113.8	MT-ND4	MT	10760	12137	+	1378	protein_coding	mitochondrially encoded NADH:ubiquinone oxidoreductase core subunit 4 [Source:HGNC Symbol;Acc:HGNC:7459]	-
ENSG00000210140	37754.6	18936.7	21883.1	35636.7	37951.5	19937	7558.73	5578.17	22423.9	5734.65	8382.49	8940.4	18710.1	6234.3	6283.05	11031.4	9362.38	17320.5	MT-TC	MT	5761	5826	-	66	Mt_tRNA	mitochondrially encoded tRNA cysteine [Source:HGNC Symbol;Acc:HGNC:7477]	-
ENSG00000212907	24941.6	16075	12086.1	23910.4	22786.9	31524.6	12184.2	9942.23	18401.5	8100.19	9214.56	2851.71	21803.9	6971.73	12054.4	9253.75	13139	21563.2	MT-ND4L	MT	10470	10766	+	297	protein_coding	mitochondrially encoded NADH:ubiquinone oxidoreductase core subunit 4L [Source:HGNC Symbol;Acc:HGNC:7460]	-
ENSG00000198727	24172.3	15231.3	11967.4	21004.5	23732.4	28457.1	10297.6	10454.5	17022.6	6615	8378.98	2635.23	20227.3	5922.26	9809.13	10703.4	13872.7	19107.7	MT-CYB	MT	14747	15887	+	1141	protein_coding	mitochondrially encoded cytochrome b [Source:HGNC Symbol;Acc:HGNC:7427]	-
ENSG00000198888	21887.2	11134.5	10893.8	19918.5	20793.3	26137.2	10474	12038	15883.9	6672.03	9128.75	3491.85	17720.1	5708.46	10278.4	5948.32	13405.2	19444.7	MT-ND1	MT	3307	4262	+	956	protein_coding	mitochondrially encoded NADH:ubiquinone oxidoreductase core subunit 1 [Source:HGNC Symbol;Acc:HGNC:7455]	-
ENSG00000198763	16282.8	13808.1	10682	15512	21319.9	23766.1	8947.46	8926.16	12872.6	6499.88	6936.03	2814.58	17795.9	5255.85	7742.26	8025.24	11479.1	16011.3	MT-ND2	MT	4470	5511	+	1042	protein_coding	mitochondrially encoded NADH:ubiquinone oxidoreductase core subunit 2 [Source:HGNC Symbol;Acc:HGNC:7456]	-
ENSG00000210135	23327.6	10743.3	12845.1	20218.3	19964.7	11010.2	4815.77	3100.18	19958.6	3945.5	4450.87	4876.88	10919.3	3731.38	4276.94	6128.74	5077.18	11975.7	MT-TN	MT	5657	5729	-	73	Mt_tRNA	mitochondrially encoded tRNA asparagine [Source:HGNC Symbol;Acc:HGNC:7493]	-
ENSG00000198695	16946.3	5067.63	8420.22	12000.4	15818.1	5152.6	3221.36	3159.81	10111.5	4477.01	3009.46	2104.17	6364.42	2922.69	2611.3	1402.96	6183.82	9474.02	MT-ND6	MT	14149	14673	-	525	protein_coding	mitochondrially encoded NADH:ubiquinone oxidoreductase core subunit 6 [Source:HGNC Symbol;Acc:HGNC:7462]	-
ENSG00000130203	12424.7	4930.9	7610.98	18987.9	6957.51	9026.62	8372.03	11417.7	7967.16	7772.59	50.209	132.003	1271.27	43.8524	56.5825	1342.84	283.91	3864.58	APOE	19	44905754	44909393	+	2191	protein_coding	apolipoprotein E [Source:HGNC Symbol;Acc:HGNC:613]	-
ENSG00000211459	8074.71	3452.58	2680.81	7082.05	8134.43	9124.73	1815.95	2399.24	5261	1345.86	5070.81	1262.88	5605.34	2016.31	4172.09	2994.54	5515.66	4799.49	MT-RNR1	MT	648	1601	+	954	Mt_rRNA	mitochondrially encoded 12S RNA [Source:HGNC Symbol;Acc:HGNC:7470]	-
ENSG00000198786	9331.79	3496.03	4406.34	7361.84	8288.11	4744.8	2451.57	2062.43	5932.63	2986.76	2532.01	1062.92	4955.1	2235.68	2515.3	1015.97	3977.95	5737.5	MT-ND5	MT	12337	14148	+	1812	protein_coding	mitochondrially encoded NADH:ubiquinone oxidoreductase core subunit 5 [Source:HGNC Symbol;Acc:HGNC:7461]	-
ENSG00000210196	1852.25	3550.4	1907.58	1316.2	3920.02	7404.66	2407.27	1120.93	3630.9	1684.4	2484.71	1303.05	4996.49	1411	474.44	2800.52	2553.42	3932.48	MT-TP	MT	15956	16023	-	68	Mt_tRNA	mitochondrially encoded tRNA proline [Source:HGNC Symbol;Acc:HGNC:7494]	-
ENSG00000087086	1407.93	1310.02	2367.58	2365.22	1225.62	1707.95	6202.08	4468.86	1112.82	1555.19	917.109	1496.37	2095.86	502.224	1262.14	1805.53	1147.6	1473.85	FTL	19	48965301	48966878	+	878	protein_coding	ferritin light chain [Source:HGNC Symbol;Acc:HGNC:3999]	-
ENSG00000101335	2525.54	1912.17	3256.12	3060.13	2640.26	2476	760.196	754.548	1834.47	1468.59	53.3231	80.9735	328.379	53.694	64.6812	744.418	49.5983	750.11	MYL9	20	36541484	36551447	+	2821	protein_coding	myosin light chain 9 [Source:HGNC Symbol;Acc:HGNC:15754]	-
ENSG00000205542	1630.08	1462.74	2162.79	1679.2	1299.04	939.085	1334.68	1454.69	895.628	960.569	671.936	1554.77	847.618	681.836	1153.47	2056.28	471.604	869.003	TMSB4X	X	12975108	12977227	+	1705	protein_coding	thymosin beta 4 X-linked [Source:HGNC Symbol;Acc:HGNC:11881]	-
ENSG00000075624	2163.26	1635.38	2281.08	1964.37	1821.52	1393.57	932.116	1040.35	1730.39	1494.22	573.05	702.549	699.415	743.759	592.273	694.656	329.694	1075.49	ACTB	7	5527147	5563784	-	3519	protein_coding	actin beta [Source:HGNC Symbol;Acc:HGNC:132]	-
ENSG00000197956	2674.02	1421	2403.08	2069.85	1673.23	1347.84	616.6	1276.9	1170.56	698.032	1074.66	658.514	565.794	698.67	1462.28	1000.82	333.671	590.437	S100A6	1	153534599	153536244	-	971	protein_coding	S100 calcium binding protein A6 [Source:HGNC Symbol;Acc:HGNC:10496]	-
ENSG00000248527	1408.25	1653.26	460.223	2024.42	1382.45	2990.59	940.669	459.325	1675.43	283.042	416.262	351.069	884.178	520.853	512.927	1164.93	873.125	2051.1	MTATP6P1	1	633696	634376	+	681	unprocessed_pseudogene	MT-ATP6 pseudogene 1 [Source:HGNC Symbol;Acc:HGNC:44575]	-
ENSG00000228253	2264.24	1197.34	1478.14	1823.26	1725.2	1964.13	712.528	543.264	822.037	509.261	652.18	243.127	1292.88	377.743	571.71	744.474	903.348	1572.26	MT-ATP8	MT	8366	8572	+	207	protein_coding	mitochondrially encoded ATP synthase membrane subunit 8 [Source:HGNC Symbol;Acc:HGNC:7415]	-
ENSG00000156508	714.894	866.233	1224.81	872.007	859.592	453.546	1265.9	870.329	675.909	1320.9	1220.17	1672.57	1347.37	720.205	1661.22	1889.18	928.396	672.584	EEF1A1	6	73515750	73523797	-	5948	protein_coding	eukaryotic translation elongation factor 1 alpha 1 [Source:HGNC Symbol;Acc:HGNC:3189]	-
ENSG00000143387	1981.12	808.658	2595.99	1341.58	1119.81	1502.59	954.859	1243.94	1257.57	2227.3	12.0633	24.4521	270.719	18.2551	38.2151	1813.06	18.8974	873.798	CTSK	1	150796208	150808323	-	1887	protein_coding	cathepsin K [Source:HGNC Symbol;Acc:HGNC:2536]	-
ENSG00000034510	1016.16	1143.05	1199.53	1283.52	1236	848.485	1536.9	2129.07	492.86	544.667	446.109	1726.61	671.711	569.974	655.102	1215.49	395.514	871.696	TMSB10	2	84905625	84906675	+	496	protein_coding	thymosin beta 10 [Source:HGNC Symbol;Acc:HGNC:11879]	-
ENSG00000227097	825.812	699.57	2132.86	982.618	709.271	43.216	2096.1	45.1372	1123.8	704.786	663.657	44.2983	826.161	969.872	937.084	1323.63	582.755	958.656	RPS28P7	11	82689559	82689768	+	210	processed_pseudogene	ribosomal protein S28 pseudogene 7 [Source:HGNC Symbol;Acc:HGNC:35787]	-
ENSG00000100097	1783.74	1080.04	1081.39	2230.78	1186.99	1029.53	1210.36	1669.31	1063.18	902.58	78.8357	151.983	210.006	50.3603	121.95	1000.44	51.4556	507.979	LGALS1	22	37675608	37679806	+	1099	protein_coding	galectin 1 [Source:HGNC Symbol;Acc:HGNC:6561]	-
ENSG00000225630	2985.96	799.114	557.724	931.783	1081.79	1360.12	499.598	349.527	705.492	377.374	372.093	156.247	880.818	309.174	443.172	428.64	526.726	854.417	MTND2P28	1	629640	630683	+	1044	unprocessed_pseudogene	MT-ND2 pseudogene 28 [Source:HGNC Symbol;Acc:HGNC:42129]	-
ENSG00000106211	1933.56	778.687	1241.53	1428.17	1193.76	1422.3	439.764	650.602	962.621	694.83	297.216	237.434	330.558	292.107	433.725	208.106	169.086	494.5	HSPB1	7	76302544	76304295	+	1634	protein_coding	heat shock protein family B (small) member 1 [Source:HGNC Symbol;Acc:HGNC:5246]	-
ENSG00000274012	652.593	484.642	1056.07	598.263	310.553	220.559	1024.77	464.218	222.036	847.979	709.693	1487.18	609.584	1049.65	361.146	347.624	1190.75	458.473	RN7SL2	14	49862550	49862849	-	300	misc_RNA	RNA, 7SL, cytoplasmic 2 [Source:HGNC Symbol;Acc:HGNC:23134]	-
ENSG00000163453	1153.02	687.822	686.487	630.181	184.266	497.798	731.798	403.947	193.065	465.461	714.7	1243.64	976.442	635.016	987.417	385.763	601.916	664.237	IGFBP7	4	57030773	57110385	-	1930	protein_coding	insulin like growth factor binding protein 7 [Source:HGNC Symbol;Acc:HGNC:5476]	-
ENSG00000102109	1120.09	490.612	1362.33	1220.76	1309.17	1444.26	377.242	741.484	1267.58	739.996	159.034	107.632	256.064	81.8941	111.528	141.667	154.871	360.92	PCSK1N	X	48831094	48835633	-	1363	protein_coding	proprotein convertase subtilisin/kexin type 1 inhibitor [Source:HGNC Symbol;Acc:HGNC:17301]	-
ENSG00000106624	1458.4	679.615	1229.29	1081.07	932.911	960.201	700.584	781.321	1073.71	1114.11	19.895	49.8362	156.904	24.2606	30.4759	159.311	24.9235	636.828	AEBP1	7	44104361	44114562	+	4955	protein_coding	AE binding protein 1 [Source:HGNC Symbol;Acc:HGNC:303]	-
ENSG00000142541	494.574	568.58	803.646	510.566	517.765	533.746	703.505	553.276	414.045	570.94	486.19	1149.14	579.592	340.383	697.337	1141.37	382.772	397.208	RPL13A	19	49487554	49492308	+	2369	protein_coding	ribosomal protein L13a [Source:HGNC Symbol;Acc:HGNC:10304]	-
ENSG00000142534	553.729	728.954	961.429	678.266	806.231	395.956	605.446	673.535	435.323	438.612	444.774	829.039	489.321	319.175	711.376	1091.55	341.054	340.062	RPS11	19	49496365	49499689	+	1390	protein_coding	ribosomal protein S11 [Source:HGNC Symbol;Acc:HGNC:10384]	-
ENSG00000210144	1202.4	717.959	587.832	768.005	1119.39	878.784	304.931	266.841	581.36	389.289	318.857	412.276	604.11	358.239	311.411	321.287	362.158	717.113	MT-TY	MT	5826	5891	-	66	Mt_tRNA	mitochondrially encoded tRNA tyrosine [Source:HGNC Symbol;Acc:HGNC:7502]	-
ENSG00000169344	0.649924	0.311527	0.181801	0.676767	2.00184	0.0968063	3.97961	0.148075	0.454412	0.807518	2629.85	21.0803	1568.72	1213.79	445.504	5.12611	3898.21	48.3517	UMOD	16	20333052	20356301	-	3409	protein_coding	uromodulin [Source:HGNC Symbol;Acc:HGNC:12559]	-
ENSG00000173432	42.7633	127.064	71.0075	996.441	103.549	12.1267	4937.42	1517.89	503.964	1071.34	5.54437	12.3295	34.6406	1.3906	50.2522	11.9396	0.610329	268.14	SAA1	11	18266174	18269977	+	796	protein_coding	serum amyloid A1 [Source:HGNC Symbol;Acc:HGNC:10513]	-
ENSG00000108298	574.934	653.406	760.076	722.293	737.134	459.507	553.977	672.35	503.71	446.59	346.877	581.296	400.199	269.608	528.347	820.267	284.072	330.992	RPL19	17	39200283	39204732	+	1761	protein_coding	ribosomal protein L19 [Source:HGNC Symbol;Acc:HGNC:10312]	-
ENSG00000237550	304.42	696.995	1118.16	374.39	510.319	421.376	715.095	384.165	532.484	550.234	246.146	564.581	591.447	346.186	717.268	924.221	245.283	342.795	RPL9P9	15	82372196	82372912	-	717	transcribed_processed_pseudogene	ribosomal protein L9 pseudogene 9 [Source:HGNC Symbol;Acc:HGNC:17251]	-
ENSG00000172270	1323.12	287.525	551.515	1472.31	723.302	1163.91	408.999	642.252	804.971	447.084	151.322	92.2669	226.174	117.741	122.778	74.6729	146.258	461.621	BSG	19	571277	583493	+	3797	protein_coding	basigin (Ok blood group) [Source:HGNC Symbol;Acc:HGNC:1116]	-
ENSG00000229117	236.777	257.551	414.293	278.783	165.589	295.965	627.375	354.878	231.203	575.788	632.451	1179.03	687.367	417.129	716.51	1126.46	487.028	293.648	RPL41	12	56116586	56117943	+	1088	protein_coding	ribosomal protein L41 [Source:HGNC Symbol;Acc:HGNC:10354]	-
ENSG00000211592	26.83	198.417	47.7558	210.314	120.158	166.111	1802.6	80.0026	36.2267	159.248	32.3327	4737.85	571.222	43.0069	44.1989	206.632	44.5879	253.902	IGKC	2	88857161	88857683	-	523	IG_C_gene	immunoglobulin kappa constant [Source:HGNC Symbol;Acc:HGNC:5716]	-
ENSG00000177954	293.596	370.074	472.574	265.785	314.251	364.927	491.214	272.743	289.152	389.312	455.852	1280.35	538.647	286.494	686.392	1364.98	318.483	272.608	RPS27	1	153990755	153992155	+	1035	protein_coding	ribosomal protein S27 [Source:HGNC Symbol;Acc:HGNC:10416]	-
ENSG00000109610	1328.77	445.921	1020.1	807.925	591.573	1532.36	152.584	202.316	646.509	644.959	84.2233	161.966	169.522	43.2156	150.922	51.7925	44.2902	175.726	SOD3	4	24789912	24800842	+	2128	protein_coding	superoxide dismutase 3 [Source:HGNC Symbol;Acc:HGNC:11181]	-
ENSG00000089220	420.978	243.112	419.451	634.452	277.071	337.012	505.263	587.785	379.875	491.039	893.756	168.231	379.653	408.888	898.696	188.941	572.561	302.752	PEBP1	12	118135858	118145584	+	1780	protein_coding	phosphatidylethanolamine binding protein 1 [Source:HGNC Symbol;Acc:HGNC:8630]	-
ENSG00000197746	489.003	254.215	507.077	526.297	326.607	643.163	771.32	496.355	314.347	809.255	354.05	350.005	431.858	245.115	287.69	251.017	388.493	375.841	PSAP	10	71816298	71851375	-	3239	protein_coding	prosaposin [Source:HGNC Symbol;Acc:HGNC:9498]	-
ENSG00000168653	742.206	528.968	645.092	793.839	586.916	578.727	434.464	562.82	544.052	311.057	235.501	162.032	218.62	146.727	211.371	459.586	155.676	188.408	NDUFS5	1	39026318	39034636	+	548	protein_coding	NADH:ubiquinone oxidoreductase subunit S5 [Source:HGNC Symbol;Acc:HGNC:7712]	-
ENSG00000135404	748.858	392.22	688.137	800.38	594.541	448.237	622.832	741.856	323.314	456.068	117.966	174.818	180.631	115.005	146.252	298.892	111.52	306.74	CD63	12	55725323	55729707	-	2633	protein_coding	CD63 molecule [Source:HGNC Symbol;Acc:HGNC:1692]	-
ENSG00000161016	410.454	348.284	521.298	485.048	407.941	406.746	432.588	410.59	296.108	365.964	347.075	608.442	394.804	278.663	511.762	412.462	293.181	254.938	RPL8	8	144789765	144792587	-	2159	protein_coding	ribosomal protein L8 [Source:HGNC Symbol;Acc:HGNC:10368]	-
ENSG00000112306	184.611	233.999	446.76	226.304	163.634	155.541	600.724	241.316	179.13	429.916	429.552	1014.92	505.04	275.243	590.578	920.731	319.427	258.821	RPS12	6	132814441	132817564	+	767	protein_coding	ribosomal protein S12 [Source:HGNC Symbol;Acc:HGNC:10385]	-
ENSG00000231500	376.34	433.453	526.011	474.991	533.322	248.727	367.401	525.06	278.722	276.881	296.432	676.794	348.268	231.648	459.471	664.654	238.381	190.602	RPS18	6	33272010	33276510	+	1898	protein_coding	ribosomal protein S18 [Source:HGNC Symbol;Acc:HGNC:10401]	-
ENSG00000184009	448.26	376.066	370.178	322.684	337.907	314.025	339.918	297.435	282.693	302.058	514.539	566.675	456.086	642.213	587.899	303.146	308.862	363.097	ACTG1	17	81509971	81523847	-	2993	protein_coding	actin gamma 1 [Source:HGNC Symbol;Acc:HGNC:144]	-
ENSG00000019582	456.479	233.193	317.354	621.955	348.854	454.13	547.71	488.494	282.446	340.781	201.888	709.37	372.486	291.011	326.197	156.98	135.463	584.911	CD74	5	150401637	150412929	-	3184	protein_coding	CD74 molecule [Source:HGNC Symbol;Acc:HGNC:1697]	-
ENSG00000142089	502.149	419.577	600.127	547.528	545.474	388.524	339.811	615.133	429.041	358.298	155.29	318.415	292.677	185.91	263.675	250.098	131.331	276.73	IFITM3	11	319669	327537	-	1348	protein_coding	interferon induced transmembrane protein 3 [Source:HGNC Symbol;Acc:HGNC:5414]	-
ENSG00000099795	504.492	279.428	456.124	590.001	453.162	688.925	387.457	448.701	348.843	329.25	254.414	143.306	241.496	171.854	216.245	244.03	191.676	166.679	NDUFB7	19	14566078	14572062	-	531	protein_coding	NADH:ubiquinone oxidoreductase subunit B7 [Source:HGNC Symbol;Acc:HGNC:7702]	-
ENSG00000084207	646.061	265.665	481.278	617.449	395.112	321.939	310.133	238.086	462.801	316.829	298.889	179.213	210.1	218.812	407.145	221.444	161.814	223.667	GSTP1	11	67583595	67586656	+	1911	protein_coding	glutathione S-transferase pi 1 [Source:HGNC Symbol;Acc:HGNC:4638]	-
ENSG00000148303	313.236	291.383	549.822	413.37	328.627	267.712	381.317	363.794	266.092	302.17	259.01	436.813	306.848	204.262	392.088	435.389	219.747	238.056	RPL7A	9	133348214	133351426	+	2242	protein_coding	ribosomal protein L7a [Source:HGNC Symbol;Acc:HGNC:10364]	-
ENSG00000111341	1005.26	390.179	535.895	308.424	307.32	657.399	266.066	365.834	147.946	234.03	100.816	274.532	145.872	58.1856	181.986	649.594	28.6817	271.651	MGP	12	14881181	14885926	-	2639	protein_coding	matrix Gla protein [Source:HGNC Symbol;Acc:HGNC:7060]	-
ENSG00000136942	393.431	381.805	406.416	373.229	465.607	459.438	306.959	376.244	253.886	211.407	211.791	485.798	261.317	155.243	303.281	501.708	157.584	168.771	RPL35	9	124857880	124861981	-	1535	protein_coding	ribosomal protein L35 [Source:HGNC Symbol;Acc:HGNC:10344]	-
ENSG00000107796	683.281	397.841	912.083	365.478	169.789	246.595	198.922	99.7552	620.89	1025.13	14.7204	25.9761	181.773	32.9398	15.9233	479.473	13.827	372.213	ACTA2	10	88935074	88991339	-	2976	protein_coding	actin, alpha 2, smooth muscle, aorta [Source:HGNC Symbol;Acc:HGNC:130]	-
ENSG00000198467	767.759	665.15	759.376	625.661	671.537	556.617	148.296	199.812	391.528	313.874	21.2256	35.6009	88.1932	29.2407	31.2993	291.066	15.7055	243.877	TPM2	9	35681992	35690121	-	3248	protein_coding	tropomyosin 2 [Source:HGNC Symbol;Acc:HGNC:12011]	-
ENSG00000137818	352.999	366.337	457.723	359.402	390.717	321.916	327.327	339.475	249.597	227.756	255.984	371.409	233.69	143.185	549.133	516.898	148.197	191.883	RPLP1	15	69452784	69456194	+	3271	protein_coding	ribosomal protein lateral stalk subunit P1 [Source:HGNC Symbol;Acc:HGNC:10372]	-
ENSG00000140988	388.7	267.527	406.246	445.464	345.351	352.716	423.016	441.867	236.865	284.067	178.604	487.049	268.973	144.739	308.594	338.764	159.8	244.41	RPS2	16	1962052	1964860	-	2413	protein_coding	ribosomal protein S2 [Source:HGNC Symbol;Acc:HGNC:10404]	-
ENSG00000116741	716.813	409.444	462.099	499.725	600.888	369.69	135.014	397.644	701.747	340.627	18.8838	27.9168	100.587	67.6404	72.5732	548.358	24.4765	204.419	RGS2	1	192809039	192812283	+	2096	protein_coding	regulator of G protein signaling 2 [Source:HGNC Symbol;Acc:HGNC:9998]	-
ENSG00000137154	289.906	333.111	449.976	341.53	379.575	247.266	338.507	376.246	239.99	220.462	269.339	484.172	306.198	180.419	367.263	449.455	220.768	199.348	RPS6	9	19375715	19380254	-	2714	protein_coding	ribosomal protein S6 [Source:HGNC Symbol;Acc:HGNC:10429]	-
ENSG00000187653	329.23	302.304	588.082	387.532	279.564	194.341	351.308	357.299	245.824	322.663	194.771	394.845	254.962	197.77	339.854	515.125	129.193	190.41	TMSB4XP8	4	90838903	90839037	-	135	processed_pseudogene	TMSB4X pseudogene 8 [Source:HGNC Symbol;Acc:HGNC:11885]	-
ENSG00000204287	323.369	155.309	197.112	352.532	179.647	275.934	433.062	306.554	158.307	290.379	185.171	1045.49	338.929	238.299	263.667	359.31	93.6726	342.684	HLA-DRA	6	32439842	32445046	+	1280	protein_coding	major histocompatibility complex, class II, DR alpha [Source:HGNC Symbol;Acc:HGNC:4947]	-
ENSG00000164825	0.842751	1.58697	1.29657	0.993705	3.22777	0.172601	6.56768	3.4028	0.623226	2.37137	1542.28	191.891	2215.41	323.646	173.675	28.6481	873.565	163.497	DEFB1	8	6870575	6878022	-	478	protein_coding	defensin beta 1 [Source:HGNC Symbol;Acc:HGNC:2766]	-
ENSG00000110955	293.914	142.61	283.803	408.479	120.727	271.422	586.045	281.452	304.471	764.674	358.644	132.589	363.65	247.069	209.774	217.104	275.048	230.09	ATP5F1B	12	56638175	56646068	-	2322	protein_coding	ATP synthase F1 subunit beta [Source:HGNC Symbol;Acc:HGNC:830]	-
ENSG00000170323	29.7702	42.0582	35.4275	453.701	13.2625	20.3894	2521.65	912.629	171.571	1002.56	11.614	18.0922	26.6085	3.80603	29.5538	13.5061	4.28053	161.228	FABP4	8	81478419	81483263	-	1396	protein_coding	fatty acid binding protein 4 [Source:HGNC Symbol;Acc:HGNC:3559]	-
ENSG00000167996	293.362	173.014	499.868	358.165	131.954	174.517	813.641	309.034	306.942	686.12	171.819	226.517	283.03	133.223	173.407	296.232	162.786	260.936	FTH1	11	61959718	61967660	-	2030	protein_coding	ferritin heavy chain 1 [Source:HGNC Symbol;Acc:HGNC:3976]	-
ENSG00000162244	329.269	338.248	393.176	409.608	409.334	220.61	329.603	433.221	254.592	197.522	226.998	435.863	206.459	173.148	251.09	463.317	160.949	188.126	RPL29	3	51993522	51995942	-	2058	protein_coding	ribosomal protein L29 [Source:HGNC Symbol;Acc:HGNC:10331]	-
ENSG00000100316	301.572	288.395	392.156	330.874	295.48	238.082	306.075	315.846	248.801	264.01	273.942	419.124	294.43	212.615	413.859	364.142	234.143	203.124	RPL3	22	39312882	39320389	-	4787	protein_coding	ribosomal protein L3 [Source:HGNC Symbol;Acc:HGNC:10332]	-
ENSG00000233276	346.635	186.725	317.941	616.824	196.324	406.4	817.415	601.628	207.657	426.079	128.745	203.812	150.58	111.59	184.563	183.589	75.5912	231.129	GPX1	3	49357171	49358600	-	1430	polymorphic_pseudogene	glutathione peroxidase 1 [Source:HGNC Symbol;Acc:HGNC:4553]	-
ENSG00000206503	454.515	298.781	315.711	396.469	265.328	413.307	304.399	295.195	334.574	376.584	139.265	389.647	403.65	156.782	148.476	245.846	177.675	224.727	HLA-A	6	29941260	29945884	+	2710	protein_coding	major histocompatibility complex, class I, A [Source:HGNC Symbol;Acc:HGNC:4931]	-
ENSG00000149591	474.808	403.512	883.263	506.277	236.153	329.592	176.523	105.932	590.131	610.063	34.7264	59.6229	142.927	43.9377	32.1886	330.54	15.6649	343.878	TAGLN	11	117199321	117204782	+	3917	protein_coding	transgelin [Source:HGNC Symbol;Acc:HGNC:11553]	-
ENSG00000135940	492.198	269.07	406.391	635.331	400.194	534.009	305.158	403.862	291.039	219.804	240.307	83.7625	204.241	131.693	161.393	248.886	152.624	131.633	COX5B	2	97646040	97648383	+	1441	protein_coding	cytochrome c oxidase subunit 5B [Source:HGNC Symbol;Acc:HGNC:2269]	-
ENSG00000118181	268.829	305.722	392.584	300.321	286.944	224.663	291.572	293.729	179.185	214.264	269.206	497.348	276.299	163.857	369.526	520.406	180.777	172.347	RPS25	11	119015712	119018691	-	1477	protein_coding	ribosomal protein S25 [Source:HGNC Symbol;Acc:HGNC:10413]	-
ENSG00000143878	346.961	210.643	362.031	233.09	211.623	139.615	500.615	227.661	360.698	394.724	149.513	310.827	345.963	458.279	192.259	148.657	173.806	399.813	RHOB	2	20447074	20449445	+	2372	protein_coding	ras homolog family member B [Source:HGNC Symbol;Acc:HGNC:668]	-
ENSG00000166710	229.393	217.942	259.098	246.453	125.867	110.339	486.888	356.058	183.838	435.927	185.74	584.518	397.316	175.818	227.743	562.899	138.698	215.806	B2M	15	44711487	44718877	+	6079	protein_coding	beta-2-microglobulin [Source:HGNC Symbol;Acc:HGNC:914]	-
ENSG00000111640	520.311	202.811	459.57	531.739	183.956	263.34	305.311	235.884	464.152	492.112	167.637	118.07	203.072	172.102	190.979	213.812	157.35	219.52	GAPDH	12	6533927	6538374	+	2981	protein_coding	glyceraldehyde-3-phosphate dehydrogenase [Source:HGNC Symbol;Acc:HGNC:4141]	-
ENSG00000198034	193.425	327.713	295.705	334.41	330.895	114.929	324.647	332.425	261.259	247.313	232.14	434.497	296.769	171.895	327.313	481.661	185.336	197.426	RPS4X	X	72255679	72277300	-	2982	protein_coding	ribosomal protein S4 X-linked [Source:HGNC Symbol;Acc:HGNC:10424]	-
ENSG00000167658	255.786	225.053	296.213	296.968	214.849	188.362	455.634	300.132	228.024	426.254	262.759	365.776	362.369	193.072	310.124	195.211	255.192	237.799	EEF2	19	3976056	3985469	-	4027	protein_coding	eukaryotic translation elongation factor 2 [Source:HGNC Symbol;Acc:HGNC:3214]	-
ENSG00000169100	306.346	212.544	365.383	349.282	195.848	336.151	430.474	331.549	239.395	429.871	256.496	234.973	290.373	170.621	205.537	240.086	231.282	198.193	SLC25A6	X	1386152	1392724	-	2164	protein_coding	solute carrier family 25 member 6 [Source:HGNC Symbol;Acc:HGNC:10992]	-
ENSG00000109846	501.154	159.781	347.792	463.294	216.379	431.469	571.112	499.316	345.425	371.417	96.8471	64.1741	89.3369	74.821	330.697	81.0904	81.344	252.828	CRYAB	11	111908565	111923722	-	3034	protein_coding	crystallin alpha B [Source:HGNC Symbol;Acc:HGNC:2389]	-
ENSG00000211445	214.175	142.233	260.934	408.937	299.765	406.621	304.51	511.456	259.758	300.961	171.563	126.981	681.579	44.9487	230.448	77.2986	310.908	197.761	GPX3	5	151020438	151028993	+	3163	protein_coding	glutathione peroxidase 3 [Source:HGNC Symbol;Acc:HGNC:4555]	-
ENSG00000130208	460.648	209.105	326.292	943.147	307.505	361.513	682.372	604.525	207.394	526.221	1.16989	6.61235	40.0618	2.55374	1.30631	142.206	1.42076	124.102	APOC1	19	44914247	44919349	+	1231	protein_coding	apolipoprotein C1 [Source:HGNC Symbol;Acc:HGNC:607]	-
ENSG00000177600	243.075	276.086	299.672	358.89	343.269	206.996	485.957	426.122	189.438	211.076	172.612	392.138	192.532	137.677	286.296	375.211	142.814	182.334	RPLP2	11	809647	812880	+	1955	protein_coding	ribosomal protein lateral stalk subunit P2 [Source:HGNC Symbol;Acc:HGNC:10377]	-
ENSG00000209082	352.704	207.679	150.395	479.515	239.739	399.315	329.632	188.454	340.006	144.658	136.89	86.8246	565.423	92.0957	195.649	86.5229	392.544	493.802	MT-TL1	MT	3230	3304	+	75	Mt_tRNA	mitochondrially encoded tRNA leucine 1 (UUA/G) [Source:HGNC Symbol;Acc:HGNC:7490]	-
ENSG00000142937	270.349	305.133	406.99	279.265	327.889	216.473	277.956	297.38	224.761	205.424	186.167	399.732	228.505	138.18	302.096	459.238	146.48	181.049	RPS8	1	44775251	44778779	+	2847	protein_coding	ribosomal protein S8 [Source:HGNC Symbol;Acc:HGNC:10441]	-
ENSG00000265972	97.3471	99.7196	127.85	229.699	73.8452	109.701	311.244	287.462	139.098	478.914	537.185	609.727	316.819	370.63	313.948	249.18	250.068	184.89	TXNIP	1	145992435	145996600	-	3625	protein_coding	thioredoxin interacting protein [Source:HGNC Symbol;Acc:HGNC:16952]	-
ENSG00000176340	331.193	140.044	328.949	398.302	179.897	286.239	374.285	289.399	211.646	339.619	308.516	126.604	311.44	235.444	246.503	199.043	262.746	142.01	COX8A	11	63974607	63976543	+	507	protein_coding	cytochrome c oxidase subunit 8A [Source:HGNC Symbol;Acc:HGNC:2294]	-
ENSG00000197958	318.226	332.137	377.745	329.344	349.272	231.965	253.367	328.634	187.513	160.676	149.485	324.454	190.372	129.544	279.215	380.763	125.418	180.727	RPL12	9	127447674	127451405	-	2452	protein_coding	ribosomal protein L12 [Source:HGNC Symbol;Acc:HGNC:10302]	-
ENSG00000159335	389.407	361.61	509.799	367.158	432.729	317.26	206.984	359.797	300.447	242	140.974	111.127	140.357	135.832	181.351	110.576	99.0089	164.486	PTMS	12	6765516	6770952	+	1475	protein_coding	parathymosin [Source:HGNC Symbol;Acc:HGNC:9629]	-
ENSG00000126267	344.16	207.094	332.524	471.221	281.871	341.912	326.596	416.702	293.956	207.316	195.999	89.2994	168.494	156.719	168.796	239.65	134.535	137.575	COX6B1	19	35648223	35658861	+	936	protein_coding	cytochrome c oxidase subunit 6B1 [Source:HGNC Symbol;Acc:HGNC:2280]	-
ENSG00000145425	184.439	190.706	379.427	174.35	171.915	116.759	267.871	171.521	168.179	261.169	249.267	551.641	306.002	149.834	326.178	499.481	195.636	143.397	RPS3A	4	151099573	151104652	+	2341	protein_coding	ribosomal protein S3A [Source:HGNC Symbol;Acc:HGNC:10421]	-
ENSG00000126432	345.77	178.104	338.542	392.394	233.245	275.965	276.344	373.833	191.084	233.195	283.21	182.303	249.436	182.313	236.011	169.768	201.238	124.759	PRDX5	11	64318088	64321811	+	893	protein_coding	peroxiredoxin 5 [Source:HGNC Symbol;Acc:HGNC:9355]	-
ENSG00000092841	360.897	244.726	452.939	334.185	187.951	273.573	283.826	214.116	253.834	384.421	149.548	150.56	174.101	126.452	150.724	391.375	106.683	172.655	MYL6	12	56158161	56163496	+	4609	protein_coding	myosin light chain 6 [Source:HGNC Symbol;Acc:HGNC:7587]	-
ENSG00000166165	420.695	183.698	307.534	556.576	231.874	438.853	192.733	327.111	365.229	314.074	106.645	37.4162	186.769	116.573	62.3022	96.8128	167.808	279.484	CKB	14	103519659	103523111	-	2669	protein_coding	creatine kinase B [Source:HGNC Symbol;Acc:HGNC:1991]	-
ENSG00000065978	273.148	183.76	316.655	334.603	138.115	161.031	432.387	304.994	234.185	347.998	195.837	201.983	204.879	143.292	189.162	263.926	156.042	206.473	YBX1	1	42682427	42702349	+	1930	protein_coding	Y-box binding protein 1 [Source:HGNC Symbol;Acc:HGNC:8014]	CSD
ENSG00000142871	459.719	370.005	463.62	100.25	224.7	62.6083	291.991	46.1495	386.533	176.178	87.4243	228.227	143.224	212.366	98.0481	317.671	45.5743	552.659	CYR61	1	85580761	85583962	+	2455	protein_coding	cysteine rich angiogenic inducer 61 [Source:HGNC Symbol;Acc:HGNC:2654]	-
ENSG00000127184	334.618	194.165	380.376	351.638	209.228	338.872	254.843	269.406	263.224	268.531	184.589	127.917	210.139	101.794	161.851	354.674	124.417	114.491	COX7C	5	86617904	86620962	+	1993	protein_coding	cytochrome c oxidase subunit 7C [Source:HGNC Symbol;Acc:HGNC:2292]	-
ENSG00000130066	392.192	248.848	237.88	340.312	362.415	163.487	338.356	517.699	205.455	234.945	110.524	118.406	141.9	154.171	88.2129	225.146	105.625	202.832	SAT1	X	23783173	23786226	+	2498	protein_coding	spermidine/spermine N1-acetyltransferase 1 [Source:HGNC Symbol;Acc:HGNC:10540]	-
ENSG00000115268	249.235	225.406	319.885	288.379	304.538	257.316	227.256	271.593	233.917	159.052	149.803	261.514	186.279	110.101	258.974	285.488	122.399	149.703	RPS15	19	1438358	1440494	+	2137	protein_coding	ribosomal protein S15 [Source:HGNC Symbol;Acc:HGNC:10388]	-
ENSG00000120129	202.847	179.016	159.529	122.739	267.609	95.5386	428.848	203.488	146.841	152.601	132.304	193.655	257.132	434.829	250.415	188.239	192.548	376.792	DUSP1	5	172768090	172771195	-	2019	protein_coding	dual specificity phosphatase 1 [Source:HGNC Symbol;Acc:HGNC:3064]	-
ENSG00000204592	207.578	172.996	179.907	242.32	188.556	193.21	400.804	350.533	153.127	210.392	150.096	361.834	276.266	178.074	197.647	175.788	130.87	204.156	HLA-E	6	30489467	30494205	+	2975	protein_coding	major histocompatibility complex, class I, E [Source:HGNC Symbol;Acc:HGNC:4962]	-
ENSG00000128016	476.02	306.371	91.0521	99.2856	240.938	75.7305	464.85	99.0044	143.615	89.2903	136.433	104.065	195.337	446.27	128.881	98.8368	76.1122	664.104	ZFP36	19	39406813	39409412	+	2010	protein_coding	ZFP36 ring finger protein [Source:HGNC Symbol;Acc:HGNC:12862]	-
ENSG00000163191	207.934	176.033	145.917	144.194	162.578	128.123	284.504	294.212	63.7861	110.891	351.289	310.202	166.674	310.654	673.749	82.2799	137.03	161.957	S100A11	1	152032506	152047907	-	680	protein_coding	S100 calcium binding protein A11 [Source:HGNC Symbol;Acc:HGNC:10488]	-
ENSG00000167468	212.491	133.73	204.53	437.82	178.494	226.996	563.208	554.959	187.978	365.755	80.9241	102.149	125.646	65.4831	122.457	108.823	84.9407	140.411	GPX4	19	1103926	1106791	+	2019	protein_coding	glutathione peroxidase 4 [Source:HGNC Symbol;Acc:HGNC:4556]	-
ENSG00000196262	310.912	219.892	309.026	374.57	210.721	211.321	256.152	304.9	237.071	219.221	163.246	140.694	150.018	117.875	176.654	241.877	101.012	148.599	PPIA	7	44796680	44824564	+	4432	protein_coding	peptidylprolyl isomerase A [Source:HGNC Symbol;Acc:HGNC:9253]	-
ENSG00000198755	140.227	141.202	242.04	158.587	98.362	137.029	273.203	127.047	145.756	264.563	211.946	444.463	276.231	153.42	239.811	453.398	167.853	158.553	RPL10A	6	35468408	35470785	+	1501	protein_coding	ribosomal protein L10a [Source:HGNC Symbol;Acc:HGNC:10299]	-
ENSG00000221869	309.987	215.776	197.964	214.721	209.793	103.565	290.543	336.809	213.62	143.468	86.8331	191.947	214.874	300.545	203.155	167.459	119.18	280.094	CEBPD	8	47736909	47739086	-	2178	protein_coding	CCAAT enhancer binding protein delta [Source:HGNC Symbol;Acc:HGNC:1835]	C/EBP
ENSG00000113140	258.286	308.766	340.912	185.814	114.924	97.3951	666.846	388.77	112.846	402.409	52.9854	158.083	174	55.5499	62.7346	170.74	56.7983	186.32	SPARC	5	151661096	151687165	-	4831	protein_coding	secreted protein acidic and cysteine rich [Source:HGNC Symbol;Acc:HGNC:11219]	-
ENSG00000234745	179.214	161.692	202.097	259.591	193.856	144.509	372.023	274.132	153.394	173.519	106.342	437.492	215.969	159.141	200.449	188.592	113.645	230.875	HLA-B	6	31269491	31357188	-	3051	protein_coding	major histocompatibility complex, class I, B [Source:HGNC Symbol;Acc:HGNC:4932]	-
ENSG00000101439	322.904	140.792	397.535	370.021	187.467	287.634	238.334	237.754	430.914	273.712	79.9873	168.14	144.464	65.2468	76.9627	76.665	76.4299	178.816	CST3	20	23626706	23638473	-	3695	protein_coding	cystatin C [Source:HGNC Symbol;Acc:HGNC:2475]	-
ENSG00000137077	252.28	346.118	48.5612	69.9121	1299.86	142.148	17.7765	44.3723	538.739	71.5604	2.66468	368.28	92.2697	3.59389	8.6473	279.923	3.04953	149.712	CCL21	9	34709005	34710124	-	924	protein_coding	C-C motif chemokine ligand 21 [Source:HGNC Symbol;Acc:HGNC:10620]	-
ENSG00000008988	208.194	257.203	365.208	312.562	294.888	168.277	242.017	272.199	158.795	168.422	116.078	237.71	140.649	91.1789	181.675	318.815	91.4841	110.504	RPS20	8	56067295	56074581	-	3002	protein_coding	ribosomal protein S20 [Source:HGNC Symbol;Acc:HGNC:10405]	-
ENSG00000103154	621.25	233.17	343.868	295.281	380.373	653.281	36.3944	122.169	500.617	274.297	0.258089	0.332237	53.6537	1.07178	0.219355	84.9981	3.06531	123.373	NECAB2	16	83968632	84002776	+	2520	protein_coding	N-terminal EF-hand calcium binding protein 2 [Source:HGNC Symbol;Acc:HGNC:23746]	-
ENSG00000089157	152.485	193.829	256.655	223.461	200.924	128.467	259.212	232.285	158.325	250.35	165.888	307.689	194.411	113.265	250.633	351.684	125.651	128.571	RPLP0	12	120196686	120201235	-	4001	protein_coding	ribosomal protein lateral stalk subunit P0 [Source:HGNC Symbol;Acc:HGNC:10371]	-
ENSG00000133112	242.242	248.759	309.948	252.894	295.89	183.439	218.756	256.557	184.782	153.035	107.88	258.424	177.974	84.7405	152.637	264.282	97.8595	133.726	TPT1	13	45333471	45341370	-	7269	protein_coding	tumor protein, translationally-controlled 1 [Source:HGNC Symbol;Acc:HGNC:12022]	-
ENSG00000106809	307.858	294.383	383.594	248.314	272.281	157.578	160.6	390.35	369.359	195.055	2.29412	5.58831	62.9684	0.719947	3.82831	592.061	1.97489	115.517	OGN	9	92383967	92404696	-	3321	protein_coding	osteoglycin [Source:HGNC Symbol;Acc:HGNC:8126]	-
ENSG00000147403	196.784	204.926	265.372	201.388	218.524	165.827	233.883	115.442	153.23	164.896	153.858	326.142	181.757	127.196	216.36	360.808	127.562	138.087	RPL10	X	154389955	154409168	+	4825	protein_coding	ribosomal protein L10 [Source:HGNC Symbol;Acc:HGNC:10298]	-
ENSG00000187514	232.542	208.423	230.382	241.955	173.105	113.033	193.189	211.831	157.558	173.803	210.331	235.292	167.403	217.281	255.397	233.956	134.212	161.587	PTMA	2	231706895	231713541	+	3378	protein_coding	prothymosin alpha [Source:HGNC Symbol;Acc:HGNC:9623]	-
ENSG00000105193	165.772	194.281	281.403	170.2	209.712	123.58	254.994	187.677	128.408	131.635	150.897	321.465	166.909	108.268	254.369	385.607	140.595	140.477	RPS16	19	39433207	39435948	-	2603	protein_coding	ribosomal protein S16 [Source:HGNC Symbol;Acc:HGNC:10396]	-
ENSG00000142676	188.389	176.952	224.852	209.871	192.709	144	256.412	202.814	147.304	175.633	166.501	304.531	194.527	109.268	203.012	343.607	128.536	129.844	RPL11	1	23691742	23696835	+	2659	protein_coding	ribosomal protein L11 [Source:HGNC Symbol;Acc:HGNC:10301]	-
ENSG00000107223	281.257	212.737	268.407	287.03	251.558	293.643	183.035	246.972	138.723	146.188	157.137	153.494	153.294	129.879	168.931	166.616	136.435	111.116	EDF1	9	136862119	136866286	-	1200	protein_coding	endothelial differentiation related factor 1 [Source:HGNC Symbol;Acc:HGNC:3164]	-
ENSG00000103363	299.507	186.235	287.298	338.497	292.13	285.47	166.987	276.211	202.88	136.522	121.453	103.459	127.451	90.2021	146.792	172.178	95.8724	93.2057	ELOB	16	2771414	2777297	-	1128	protein_coding	elongin B [Source:HGNC Symbol;Acc:HGNC:11619]	-
ENSG00000167526	178.911	194.837	250.996	221.455	233.375	180.125	208.789	234.456	153.614	137.767	130.494	290.805	167.673	108.568	221.413	230.637	115.796	146.983	RPL13	16	89560657	89566828	+	6172	protein_coding	ribosomal protein L13 [Source:HGNC Symbol;Acc:HGNC:10303]	-
ENSG00000117984	318.664	110.234	262.654	293.977	175.974	437.299	284.262	229.751	183.411	154.178	132.324	136.132	157.092	99.6015	141.626	48.0069	98.2523	141.663	CTSD	11	1752752	1764573	-	3126	protein_coding	cathepsin D [Source:HGNC Symbol;Acc:HGNC:2529]	-
ENSG00000149806	247.68	227.516	287.486	240.326	290.888	198.437	176.895	185.976	153.018	125.41	133.051	238.462	151.191	100.834	182.117	275.106	93.6905	95.5933	FAU	11	65120628	65122473	-	1846	protein_coding	FAU, ubiquitin like and ribosomal protein S30 fusion [Source:HGNC Symbol;Acc:HGNC:3597]	-
ENSG00000140319	252.282	190.38	234.797	247.869	201.849	195.621	183.893	229.358	242.987	177.222	184.619	115.854	148.939	110.637	199.154	260.272	111.63	104.631	SRP14	15	40035739	40039188	-	2005	protein_coding	signal recognition particle 14 [Source:HGNC Symbol;Acc:HGNC:11299]	-
ENSG00000123689	49.6178	85.8427	57.1094	313.814	58.9302	37.3456	1225.74	826.482	94.393	84.5806	121.075	36.5231	65.8038	44.9414	73.1732	68.2069	51.7238	94.3942	G0S2	1	209675420	209676388	+	866	protein_coding	G0/G1 switch 2 [Source:HGNC Symbol;Acc:HGNC:30229]	-
ENSG00000142192	176.394	115.723	169.129	163.763	111.392	113.017	151.866	146.115	143.508	246.802	329.392	163.488	212.696	230.876	412.289	124.391	208.313	134.248	APP	21	25880550	26171128	-	6316	protein_coding	amyloid beta precursor protein [Source:HGNC Symbol;Acc:HGNC:620]	-
ENSG00000141753	113.435	171.023	233.114	188.207	190.54	186.832	364.542	318.96	102.722	198.39	95.9317	296.691	206.473	109.847	106.626	110.345	124.415	187.031	IGFBP4	17	40443461	40457731	+	2200	protein_coding	insulin like growth factor binding protein 4 [Source:HGNC Symbol;Acc:HGNC:5473]	-
ENSG00000132386	322.548	160.513	349.197	346.089	244.365	298.291	251.694	311.506	366.82	258.857	2.17975	36.3891	47.3811	4.53011	5.73095	123.353	5.12892	148.938	SERPINF1	17	1761959	1777574	+	3069	protein_coding	serpin family F member 1 [Source:HGNC Symbol;Acc:HGNC:8824]	-
ENSG00000143153	40.3243	28.9564	28.3516	16.1965	15.6267	54.4265	13.3052	9.75189	64.5287	81.1295	716.163	136.54	611.091	503.996	515.297	40.5043	321.099	65.6225	ATP1B1	1	169105697	169132722	+	2962	protein_coding	ATPase Na+/K+ transporting subunit beta 1 [Source:HGNC Symbol;Acc:HGNC:804]	-
ENSG00000125356	324.827	214.565	247.661	340.431	249.993	229.199	162.325	228.597	164.507	148.824	141.976	74.8704	146.803	89.5362	125.827	202.65	91.1392	75.7835	NDUFA1	X	119871487	119876662	+	766	protein_coding	NADH:ubiquinone oxidoreductase subunit A1 [Source:HGNC Symbol;Acc:HGNC:7683]	-
ENSG00000171858	158.102	153.246	223.852	142.212	137.535	92.6649	189.222	146.003	93.5349	108.218	194.816	385.246	190.661	131.835	280.587	383.097	144.274	103.01	RPS21	20	62387116	62388520	+	1023	protein_coding	ribosomal protein S21 [Source:HGNC Symbol;Acc:HGNC:10409]	-
ENSG00000170345	347.183	221.652	31.5621	67.0805	160.687	46.9845	301.629	29.7933	53.7475	46.3422	123.615	64.3255	107.748	626.903	108.575	108.015	158.23	600.534	FOS	14	75278774	75282230	+	3238	protein_coding	Fos proto-oncogene, AP-1 transcription factor subunit [Source:HGNC Symbol;Acc:HGNC:3796]	TF_bZIP
ENSG00000210194	509.868	171.503	139.221	152.43	484.191	157.832	69.8717	56.0876	196.011	123.6	97.6249	76.1738	267.333	77.0031	91.0366	50.3557	285.861	191.567	MT-TE	MT	14674	14742	-	69	Mt_tRNA	mitochondrially encoded tRNA glutamic acid [Source:HGNC Symbol;Acc:HGNC:7479]	-
ENSG00000105372	178.425	220.988	259.584	210.194	227.337	245.75	193.354	219.906	151.155	106.292	99.5643	240.145	119.135	79.8474	168.839	283.08	78.1357	102.906	RPS19	19	41859918	41872926	+	3799	protein_coding	ribosomal protein S19 [Source:HGNC Symbol;Acc:HGNC:10402]	-
ENSG00000210176	318.181	176.633	93.4129	296.992	206.405	200.877	143.806	129.245	142.475	126.729	206.696	55.9506	280.195	193.791	135.462	14.8105	240.095	202.161	MT-TH	MT	12138	12206	+	69	Mt_tRNA	mitochondrially encoded tRNA histidine [Source:HGNC Symbol;Acc:HGNC:7487]	-
ENSG00000196924	265.049	242.465	404.456	195.913	211.095	338.205	116.542	86.1635	299.017	411.011	29.9364	71.9603	91.4204	51.2623	21.5916	84.1144	34.7809	207.105	FLNA	X	154348524	154374638	-	10585	protein_coding	filamin A [Source:HGNC Symbol;Acc:HGNC:3754]	-
ENSG00000122406	187.925	215.442	255.974	190.77	216.659	125.031	175.992	176.577	173.612	150.546	124.795	237.847	159.383	87.6244	165.533	294.027	113.96	108.716	RPL5	1	92831983	92841924	+	3717	protein_coding	ribosomal protein L5 [Source:HGNC Symbol;Acc:HGNC:10360]	-
ENSG00000244398	186.567	203.073	206.972	224.706	226.643	133.65	157.701	217.885	146.26	127.292	116.502	274.732	155.015	86.3466	175.178	276.811	82.4838	112.528	AC116533.1	11	16974693	16975013	-	321	processed_pseudogene	ribosomal protein L36a (RPL36A) pseudogene	-
ENSG00000134590	257.983	168.671	283.536	313.481	175.311	259.665	210.521	250.518	254.617	249.09	71.7492	57.2258	109.494	71.9076	76.4208	79.3916	58.8664	158.395	RTL8C	X	135032366	135033546	+	1181	protein_coding	retrotransposon Gag like 8C [Source:HGNC Symbol;Acc:HGNC:2569]	-
ENSG00000089009	168.776	194.37	228.797	204.468	214.707	125.953	196.405	218.662	152.455	154.199	107.391	212.745	154.002	86.0047	154.599	295.604	103.118	111.868	RPL6	12	112405190	112418838	-	4447	protein_coding	ribosomal protein L6 [Source:HGNC Symbol;Acc:HGNC:10362]	-
ENSG00000131469	185.014	146.547	246.741	175.065	126.591	144.849	199.779	171.945	131.247	180.447	127.697	285.921	154.403	88.6409	167.4	340.625	96.0374	99.6377	RPL27	17	42998273	43002959	+	2026	protein_coding	ribosomal protein L27 [Source:HGNC Symbol;Acc:HGNC:10328]	-
ENSG00000250479	313.629	89.764	172.256	473.394	127.235	299.256	313.605	245.961	209.101	222.496	90.9991	29.0365	105.942	63.9734	68.21	33.8888	70.6943	130.426	CHCHD10	22	23765834	23768443	-	1360	protein_coding	coiled-coil-helix-coiled-coil-helix domain containing 10 [Source:HGNC Symbol;Acc:HGNC:15559]	-
ENSG00000174444	174.047	201.505	228.619	193.673	219.311	120.118	173.311	161.198	153.829	143.623	138.181	230.379	156.531	94.2167	181.976	237.814	112.169	104.645	RPL4	15	66498015	66524532	-	5637	protein_coding	ribosomal protein L4 [Source:HGNC Symbol;Acc:HGNC:10353]	-
ENSG00000244313	180.251	229.906	228.116	215.422	289.796	214.541	138.574	188.535	122.63	79.1229	101.494	263.014	119.267	62.4142	162.966	256.507	73.166	86.7217	AC024293.1	11	46428653	46429150	-	498	processed_pseudogene	ribosomal protein S10 (RPS10) pseudogene	-
ENSG00000177606	379.317	131.414	86.7137	181.735	104.987	49.8748	359.4	174.062	73.7181	90.4344	151.205	119.055	127.278	358.492	104.153	74.9555	78.5275	366.752	JUN	1	58780788	58784327	-	3540	protein_coding	Jun proto-oncogene, AP-1 transcription factor subunit [Source:HGNC Symbol;Acc:HGNC:6204]	TF_bZIP
ENSG00000173915	263.325	165.342	293.648	306.6	198.575	151.97	200.638	253.912	184.093	152.584	111.917	73.5452	123.621	74.13	101.647	166.616	79.3405	71.1971	ATP5MD	10	103389041	103396492	-	924	protein_coding	ATP synthase membrane subunit DAPIT [Source:HGNC Symbol;Acc:HGNC:30889]	-
ENSG00000232573	214.591	264.812	212.154	217.203	318.171	188.412	129.216	199.29	144.373	71.7141	103.126	179.235	113.589	70.4451	183.426	174.669	82.1189	105.842	RPL3P4	14	98972879	98973301	-	423	processed_pseudogene	ribosomal protein L3 pseudogene 4 [Source:HGNC Symbol;Acc:HGNC:19805]	-
ENSG00000183255	248.758	125.778	217.152	254.886	192.067	265.097	132.296	158.431	232.83	228.437	122.556	95.4198	111.292	93.9864	166.669	105.399	76.5338	144.077	PTTG1IP	21	44849585	44873903	-	3537	protein_coding	PTTG1 interacting protein [Source:HGNC Symbol;Acc:HGNC:13524]	-
ENSG00000173511	235.704	146.444	239.68	298.829	156.707	360.344	309	299.097	231.11	202.667	52.7103	29.1121	65.2345	43.503	49.309	69.4842	47.2301	118.712	VEGFB	11	64234538	64238793	+	1545	protein_coding	vascular endothelial growth factor B [Source:HGNC Symbol;Acc:HGNC:12681]	-
ENSG00000109475	168.788	240.754	234.022	175.909	239.079	123.816	134.193	179.553	125.939	101.591	111.04	255.473	140.116	73.364	161.79	297.948	83.3329	86.1724	RPL34	4	108620566	108630412	+	3393	protein_coding	ribosomal protein L34 [Source:HGNC Symbol;Acc:HGNC:10340]	-
ENSG00000197766	81.8087	64.4349	38.5447	294.19	32.7786	47.598	772.313	685.444	206.825	255.927	16.157	28.5474	48.0859	6.55818	61.3143	37.2977	15.7037	225.757	CFD	19	859643	863630	+	1222	protein_coding	complement factor D [Source:HGNC Symbol;Acc:HGNC:2771]	-
ENSG00000114391	185.371	189.35	220.52	217.154	221.855	141.227	150.392	191.685	131.179	113.911	119.778	196.701	137.199	88.438	164.491	241.516	96.1138	88.7805	RPL24	3	101681091	101686782	-	2682	protein_coding	ribosomal protein L24 [Source:HGNC Symbol;Acc:HGNC:10325]	-
ENSG00000068697	136.003	102.078	191.023	146.103	64.9218	71.2682	237.116	172.644	108.506	292.269	176.585	175.201	167.591	118.314	202.636	256.295	131.117	110.37	LAPTM4A	2	20032650	20052028	-	1946	protein_coding	lysosomal protein transmembrane 4 alpha [Source:HGNC Symbol;Acc:HGNC:6924]	-
ENSG00000164405	270.746	126.428	208.242	316.553	147.708	244.315	225.382	234.752	165.344	147.19	111.848	65.3776	117.044	72.5814	95.725	147.526	73.5994	78.707	UQCRQ	5	132866560	132868031	+	1472	protein_coding	ubiquinol-cytochrome c reductase complex III subunit VII [Source:HGNC Symbol;Acc:HGNC:29594]	-
ENSG00000106153	121.942	96.9879	209.47	152.556	56.5106	68.364	248.654	145.62	132.161	227.876	216.89	157.989	202.932	149.219	222.495	187.007	140.897	109.504	CHCHD2	7	56101569	56106576	-	1132	protein_coding	coiled-coil-helix-coiled-coil-helix domain containing 2 [Source:HGNC Symbol;Acc:HGNC:21645]	-
ENSG00000087245	60.5518	177.251	410.476	170.816	255.927	89.7785	397.885	600.648	97.0945	160.344	3.75754	23.7516	28.2568	6.97406	6.97806	136.229	10.8333	198.668	MMP2	16	55389700	55506691	+	4933	protein_coding	matrix metallopeptidase 2 [Source:HGNC Symbol;Acc:HGNC:7166]	-
ENSG00000099194	151.382	99.096	58.1732	140.027	99.1494	123.462	600.672	301.923	100.238	1010.45	2.63384	3.3137	28.7505	1.66802	3.5707	34.5628	3.22553	48.5646	SCD	10	100347124	100364834	+	5362	protein_coding	stearoyl-CoA desaturase [Source:HGNC Symbol;Acc:HGNC:10571]	-
ENSG00000118680	193.737	133.182	160.586	168.27	123.167	105.691	137.857	156.97	137.726	113.849	208.788	187.666	169.528	154.625	272.85	154.188	128.572	98.7158	MYL12B	18	3261479	3278431	+	1932	protein_coding	myosin light chain 12B [Source:HGNC Symbol;Acc:HGNC:29827]	-
ENSG00000169714	141.421	154.181	183.323	173.073	154.22	108.149	172.98	174.812	136.537	171.651	152.555	181.008	164.178	99.3527	177.147	223.317	126.258	101.501	CNBP	3	129169484	129183922	-	1927	protein_coding	CCHC-type zinc finger nucleic acid binding protein [Source:HGNC Symbol;Acc:HGNC:13164]	Others
ENSG00000147604	104.069	97.5067	151.582	113.14	67.9354	53.1006	216.487	125.218	94.6277	176.061	183.091	318.792	211.818	105.46	212.28	321.852	135.569	102.611	RPL7	8	73290267	73295789	-	2907	protein_coding	ribosomal protein L7 [Source:HGNC Symbol;Acc:HGNC:10363]	-
ENSG00000136235	229.696	177.058	334.382	256.549	182.632	117.717	229.53	371.58	209.962	269.965	7.16069	9.79549	46.9745	9.85231	7.25495	192.727	11.5503	118.549	GPNMB	7	23235967	23275108	+	6040	protein_coding	glycoprotein nmb [Source:HGNC Symbol;Acc:HGNC:4462]	-
ENSG00000179218	228.382	106.043	214.632	245.771	104.405	104.239	200.155	190.933	168.555	199.082	143.373	139.505	168.747	118.311	98.5232	79.0165	126.074	143.597	CALR	19	12938578	12944489	+	2714	protein_coding	calreticulin [Source:HGNC Symbol;Acc:HGNC:1455]	-
ENSG00000272398	0.281824	0.293924	0.680394	0.306743	6.20814	0.133199	0.380128	0.235434	0.327048	0.331147	700.755	278.824	262.047	504.415	670.705	21.6957	251.413	61.9752	CD24	6	106969831	106975627	-	3097	protein_coding	CD24 molecule [Source:HGNC Symbol;Acc:HGNC:1645]	-
ENSG00000173660	173.188	96.653	207.232	256.725	90.9086	114.965	298.853	236.301	147.935	238.105	135.574	76.608	132.224	79.1196	104.537	162.651	96.9574	111.184	UQCRH	1	46303631	46316776	+	1408	protein_coding	ubiquinol-cytochrome c reductase hinge protein [Source:HGNC Symbol;Acc:HGNC:12590]	-
ENSG00000211677	8.57405	52.3227	18.1098	65.359	47.2676	51.4306	349.828	18.3317	8.51149	39.0223	5.12826	1681.52	136.106	9.39204	72.0064	77.7503	13.6703	88.9964	IGLC2	22	22900976	22901437	+	462	IG_C_gene	immunoglobulin lambda constant 2 [Source:HGNC Symbol;Acc:HGNC:5856]	-
ENSG00000128524	233.498	119.666	214.677	234.184	173.361	185.606	167.824	193.499	136.227	134.908	128.887	77.2862	133.364	93.7163	159.928	147.331	94.763	91.7171	ATP6V1F	7	128862826	128865844	+	789	protein_coding	ATPase H+ transporting V1 subunit F [Source:HGNC Symbol;Acc:HGNC:16832]	-
ENSG00000173267	205.617	126.124	110.582	753.706	61.3876	197.492	247.212	226.239	173.581	234.001	24.9976	11.7868	64.3541	9.05419	29.9821	54.0464	9.19439	162.614	SNCG	10	86958618	86963260	+	1247	protein_coding	synuclein gamma [Source:HGNC Symbol;Acc:HGNC:11141]	-
ENSG00000115461	65.3361	135.55	157.845	186.546	52.1471	47.3606	357.227	289.301	58.6093	242.637	98.1115	159.518	240.683	90.7873	153.541	59.5673	119.359	183.174	IGFBP5	2	216672105	216695525	-	6442	protein_coding	insulin like growth factor binding protein 5 [Source:HGNC Symbol;Acc:HGNC:5474]	-
ENSG00000108518	228.584	144.766	261.721	185.878	174.082	190.293	178.054	160.557	131.455	133.109	106.239	173.412	93.28	95.1494	155.815	83.626	69.7315	110.085	PFN1	17	4945652	4949061	-	1987	protein_coding	profilin 1 [Source:HGNC Symbol;Acc:HGNC:8881]	-
ENSG00000108679	258.291	92.4789	165.644	329.718	93.5322	182.064	247.342	317.809	173.205	217.715	62.166	60.6592	89.1751	60.9917	63.7126	19.8311	66.3126	152.113	LGALS3BP	17	78971238	78980109	-	3584	protein_coding	galectin 3 binding protein [Source:HGNC Symbol;Acc:HGNC:6564]	-
ENSG00000170889	171.358	137.298	171.976	169.554	133.915	144.527	165.935	137.736	101.25	121.637	129.292	261.532	134.622	83.1645	203.17	206.945	86.3721	92.2128	RPS9	19	54200742	54249003	+	4371	protein_coding	ribosomal protein S9 [Source:HGNC Symbol;Acc:HGNC:10442]	-
ENSG00000121769	403.162	112.036	204.895	404.688	88.8964	393.941	88.0237	98.7273	195.872	154.197	42.9243	16.6831	80.6872	12.4286	10.7753	127.093	69.5588	142.902	FABP3	1	31365625	31376850	-	1026	protein_coding	fatty acid binding protein 3 [Source:HGNC Symbol;Acc:HGNC:3557]	-
ENSG00000004799	111.413	54.5105	64.7599	206.976	68.3102	52.7991	235.615	275.585	193.191	484.718	93.6625	71.8952	103.071	154.817	112.058	61.3742	52.1837	201.597	PDK4	7	95583499	95596491	-	4519	protein_coding	pyruvate dehydrogenase kinase 4 [Source:HGNC Symbol;Acc:HGNC:8812]	-
ENSG00000159388	243.303	103.27	85.5793	107.482	158.911	88.6378	158.948	161.427	96.1888	175.029	87.52	49.0438	88.1044	459.406	123.999	96.1691	99.7372	213.03	BTG2	1	203305491	203309602	+	2757	protein_coding	BTG anti-proliferation factor 2 [Source:HGNC Symbol;Acc:HGNC:1131]	-
ENSG00000227081	88.729	90.4334	141.451	58.0101	83.0779	109.034	136.522	55.2078	71.0292	135.683	132.81	436.312	181.464	85.7754	167.113	449.246	99.0696	71.4236	AC005912.1	12	3211663	3211917	-	255	processed_pseudogene	ribosomal protein S27 (RPS27) pseudogene	-
ENSG00000100234	88.4055	61.6238	75.0631	106.214	41.615	93.5801	235.395	134.072	140.868	229.886	158.635	129.576	248.83	218.181	244.241	69.3678	116.701	176.493	TIMP3	22	32801701	32863043	+	4603	protein_coding	TIMP metallopeptidase inhibitor 3 [Source:HGNC Symbol;Acc:HGNC:11822]	-
ENSG00000096384	161.111	74.2787	153.276	145.958	79.3342	87.0159	187.01	128.343	117.002	202.776	146.711	184.835	211.649	138.313	166.574	99.569	138.753	135.685	HSP90AB1	6	44246166	44253888	+	2980	protein_coding	heat shock protein 90 alpha family class B member 1 [Source:HGNC Symbol;Acc:HGNC:5258]	-
ENSG00000130522	230.032	135.59	154.125	99.5074	113.746	109.916	237.269	131.022	156.259	62.8138	129.593	88.1579	169.682	218.603	178.486	41.3048	81.4919	220.405	JUND	19	18279760	18281622	-	1863	protein_coding	JunD proto-oncogene, AP-1 transcription factor subunit [Source:HGNC Symbol;Acc:HGNC:6206]	TF_bZIP
ENSG00000161281	351.513	121.2	196.031	352.23	124.287	333.457	181.609	210.468	208.472	75.7073	41.7919	19.419	71.5166	29.5325	24.2769	111.843	28.9272	68.1791	COX7A1	19	36150922	36152869	-	1006	protein_coding	cytochrome c oxidase subunit 7A1 [Source:HGNC Symbol;Acc:HGNC:2287]	-
ENSG00000035862	270.917	143.49	230.267	193.943	129.028	258.114	213.342	232.953	164.018	259.795	22.0363	52.252	68.2946	21.2855	24.9254	99.7886	23.7779	130.174	TIMP2	17	78852977	78925387	-	5633	protein_coding	TIMP metallopeptidase inhibitor 2 [Source:HGNC Symbol;Acc:HGNC:11821]	-
ENSG00000108828	258.143	109.477	206.126	238.532	149.853	258.656	225.296	224.27	181.022	272.568	31.4616	30.2382	53.5568	29.6823	49.4053	64.7277	32.0967	122	VAT1	17	43014605	43025123	-	3501	protein_coding	vesicle amine transport 1 [Source:HGNC Symbol;Acc:HGNC:16919]	-
ENSG00000276365	291.445	353.424	302.132	47.0365	130.821	253.135	0.637043	15.934	589.711	71.1515	3.69536	10.5712	16.5674	15.0944	3.42629	272.9	2.20828	133.594	MIR145	5	149430646	149430733	+	88	miRNA	microRNA 145 [Source:HGNC Symbol;Acc:HGNC:31532]	-
ENSG00000144713	130.416	156.01	178.664	153.515	165.438	97.8284	155.039	157.06	108.142	104.399	102.915	226.939	130.099	75.7942	156.282	247.94	83.948	81.0046	RPL32	3	12834485	12841588	-	3720	protein_coding	ribosomal protein L32 [Source:HGNC Symbol;Acc:HGNC:10336]	-
ENSG00000171223	299.802	118.815	47.9121	57.0809	63.0584	50.2272	195.439	46.0103	48.8101	67.1747	164.893	82.4715	145.793	501.592	128.171	70.4678	118.92	270.762	JUNB	19	12791496	12793315	+	1820	protein_coding	JunB proto-oncogene, AP-1 transcription factor subunit [Source:HGNC Symbol;Acc:HGNC:6205]	TF_bZIP
ENSG00000167580	0.140361	0.0822297	0.302321	0	0.220549	0	0.338573	0.130285	0.110719	0.200611	596.212	3.33858	172.172	830.038	529.662	1.74475	329.863	9.63573	AQP2	12	49950741	49958881	+	4305	protein_coding	aquaporin 2 [Source:HGNC Symbol;Acc:HGNC:634]	-
ENSG00000063177	151.538	191.484	213.507	170.454	240.34	164.81	126.424	157.882	102.811	82.3698	80.1308	156.47	92.3942	65.7051	136.943	187.389	71.1247	82.1582	RPL18	19	48615328	48619536	-	4209	protein_coding	ribosomal protein L18 [Source:HGNC Symbol;Acc:HGNC:10310]	-
ENSG00000150991	231.163	110.912	148.803	164.783	115.12	90.9906	186.415	155.946	138.022	133.239	141.728	112.655	136.615	102.979	138.754	119.666	73.0852	173.035	UBC	12	124911604	124917368	-	3898	protein_coding	ubiquitin C [Source:HGNC Symbol;Acc:HGNC:12468]	-
ENSG00000106538	132.566	148.239	246.581	179.442	269.523	122.488	114.571	72.2336	161.187	155.131	153.636	89.5639	93.1851	57.3915	202.421	118.072	46.8372	71.8527	RARRES2	7	150338317	150341674	-	1921	protein_coding	retinoic acid receptor responder 2 [Source:HGNC Symbol;Acc:HGNC:9868]	-
ENSG00000210174	145.64	121.371	97.2545	300.654	171.633	140.89	62.097	59.5391	230.072	63.942	180.106	28.6235	200.892	106.945	126.79	7.86095	188.35	195.859	MT-TR	MT	10405	10469	+	65	Mt_tRNA	mitochondrially encoded tRNA arginine [Source:HGNC Symbol;Acc:HGNC:7496]	-
ENSG00000204525	57.4981	52.4271	85.7329	110.81	65.7797	87.7028	219.275	171.82	74.7191	254.9	82.9055	142.1	302.504	120.485	272.488	64.9556	111.175	143.281	HLA-C	6	31268749	31272130	-	2507	protein_coding	major histocompatibility complex, class I, C [Source:HGNC Symbol;Acc:HGNC:4933]	-
ENSG00000130255	145.153	126.072	184.864	168.744	146.133	134.758	156.879	158.931	93.4878	95.8615	88.2705	213.445	125.13	75.9838	148.567	177.262	75.9097	86.3561	RPL36	19	5674947	5691876	+	2272	protein_coding	ribosomal protein L36 [Source:HGNC Symbol;Acc:HGNC:13631]	-
ENSG00000143947	103.369	99.64	153.771	105.339	95.97	108.704	153.009	82.5903	79.8911	132.304	135.554	267.221	143.748	91.8637	163.874	295.574	106.788	76.5014	RPS27A	2	55231903	55235853	+	3130	protein_coding	ribosomal protein S27a [Source:HGNC Symbol;Acc:HGNC:10417]	-
ENSG00000228474	154.075	93.687	184.721	190.638	90.2913	86.6341	183.539	213.741	100.185	157.051	113.265	126.213	125.013	84.6123	148.66	167.857	77.0288	87.4302	OST4	2	27070472	27071773	-	719	protein_coding	oligosaccharyltransferase complex subunit 4, non-catalytic [Source:HGNC Symbol;Acc:HGNC:32483]	-
ENSG00000172216	274.152	141.165	199.014	179.457	129.878	237.682	214.208	200.894	192.844	174.873	19.9979	57.6659	88.1473	43.4619	39.3077	70.6099	12.4684	104.979	CEBPB	20	50190734	50192689	+	1956	protein_coding	CCAAT enhancer binding protein beta [Source:HGNC Symbol;Acc:HGNC:1834]	C/EBP
ENSG00000110700	115.42	121.177	190.634	137.078	119.497	66.9914	154.69	145.017	99.2644	115.905	114.886	205.118	128.023	79.9655	177.469	237.997	81.0519	84.9885	RPS13	11	17074389	17077787	-	2186	protein_coding	ribosomal protein S13 [Source:HGNC Symbol;Acc:HGNC:10386]	-
ENSG00000174748	125.688	153.205	171.562	139.028	144.459	93.6986	134.646	128.5	108.477	125.682	109.27	169.9	130.472	75.17	150.256	238.331	86.7376	80.3375	RPL15	3	23916545	23924374	+	7222	protein_coding	ribosomal protein L15 [Source:HGNC Symbol;Acc:HGNC:10306]	-
ENSG00000131143	203.225	102.989	171.236	274.907	156.13	192.949	174.193	210.129	147.546	133.061	77.7983	53.5892	83.6006	55.2536	75.6614	94.6431	66.1821	79.6879	COX4I1	16	85798633	85807044	+	4792	protein_coding	cytochrome c oxidase subunit 4I1 [Source:HGNC Symbol;Acc:HGNC:2265]	-
ENSG00000176046	221.367	122.738	226.659	262.514	210.048	233.783	197.593	347.933	117.197	129.891	22.3356	12.3128	21.2486	17.9557	43.0341	73.5735	23.7089	55.6635	NUPR1	16	28532708	28539174	-	5674	protein_coding	nuclear protein 1, transcriptional regulator [Source:HGNC Symbol;Acc:HGNC:29990]	-
ENSG00000168028	141.852	133.135	165.112	128.557	140.544	134.487	122.204	124.031	105.492	110.326	100.997	193.273	119.433	80.3866	162.669	204.398	79.662	68.8987	RPSA	3	39406689	39412542	+	3936	protein_coding	ribosomal protein SA [Source:HGNC Symbol;Acc:HGNC:6502]	-
ENSG00000142173	132.633	307.597	327.83	101.885	257.484	115.514	172.249	233.431	152.369	139.783	15.9827	53.8192	39.4264	25.0567	21.1608	97.3826	19.3481	100.768	COL6A2	21	46098097	46132849	+	5386	protein_coding	collagen type VI alpha 2 chain [Source:HGNC Symbol;Acc:HGNC:2212]	-
ENSG00000165502	147.418	124.937	170.724	190.378	105.717	56.6242	153.3	159.541	90.8082	133.712	125.979	147.957	133.999	70.5105	127.517	202.878	82.707	85.5723	RPL36AL	14	49618519	49620685	-	746	protein_coding	ribosomal protein L36a like [Source:HGNC Symbol;Acc:HGNC:10346]	-
ENSG00000165092	145.778	65.0025	74.2014	243.581	43.2407	84.9068	222.567	293.175	97.1188	282.238	119.964	65.0597	120.903	71.9245	75.7752	75.6489	116.382	109.725	ALDH1A1	9	72900662	73080442	-	2849	protein_coding	aldehyde dehydrogenase 1 family member A1 [Source:HGNC Symbol;Acc:HGNC:402]	-
ENSG00000165507	398.913	71.7573	47.0176	201.267	137.567	133.351	387.545	172.48	59.6004	85.2326	13.4736	153.826	42.8546	26.2926	15.047	39.4842	15.2156	288.964	DEPP1	10	44970981	44978810	-	2979	protein_coding	DEPP1, autophagy regulator [Source:HGNC Symbol;Acc:HGNC:23355]	-
ENSG00000149131	186.771	140.499	229.842	140.947	227.813	134.643	95.5958	126.388	236.751	157.257	37.8946	92.3809	77.498	50.2737	67.9374	75.0914	52.3038	109.84	SERPING1	11	57597387	57614853	+	3603	protein_coding	serpin family G member 1 [Source:HGNC Symbol;Acc:HGNC:1228]	-
ENSG00000100300	157.119	85.7453	117.69	249.458	71.6175	120.608	282.264	257.694	106.016	190.088	91.1879	69.7538	77.7214	65.7	107.446	72.0966	45.6773	68.0301	TSPO	22	43151514	43163242	+	1455	protein_coding	translocator protein [Source:HGNC Symbol;Acc:HGNC:1158]	-
ENSG00000166033	215.617	99.8112	192.835	164.325	85.0933	117.003	216.442	196.442	96.6515	147.365	28.8235	150.52	177.76	22.5755	47.3195	96.3407	52.8031	125.622	HTRA1	10	122458551	122514908	+	2279	protein_coding	HtrA serine peptidase 1 [Source:HGNC Symbol;Acc:HGNC:9476]	-
ENSG00000173812	161.612	88.9848	156.385	152.493	98.8968	131.44	174.601	151.791	112.27	153.752	108.132	107.572	131.448	103.207	112.35	85.9595	85.914	93.8159	EIF1	17	41688885	41692668	+	3623	protein_coding	eukaryotic translation initiation factor 1 [Source:HGNC Symbol;Acc:HGNC:3249]	-
ENSG00000117691	335.644	121.028	173.504	153.029	164.802	383.001	69.1995	96.8235	145.758	106.373	57.1298	45.1146	65.1966	35.8447	66.8738	94.2739	40.3791	55.2773	NENF	1	212432887	212446379	+	1297	protein_coding	neudesin neurotrophic factor [Source:HGNC Symbol;Acc:HGNC:30384]	-
ENSG00000125534	122.004	143.208	183.775	136.27	159.799	160.708	73.6362	148.422	112.462	76.1796	131.257	101.232	134.657	125.545	142.397	35.5432	143.482	74.1091	PPDPF	20	63520724	63522206	+	1094	protein_coding	pancreatic progenitor cell differentiation and proliferation factor [Source:HGNC Symbol;Acc:HGNC:16142]	-
ENSG00000125148	161.62	113.289	65.3156	50.4609	60.4377	48.5873	181.299	79.8352	100.952	57.4259	75.6385	314.027	198.851	171.858	93.1542	118.674	67.7683	235.259	MT2A	16	56608199	56609497	+	1299	protein_coding	metallothionein 2A [Source:HGNC Symbol;Acc:HGNC:7406]	-
ENSG00000142168	176.078	104.875	150.136	192.04	118.418	122.182	143.301	169.374	119.013	132.256	112.723	78.0749	112.083	66.5138	105.184	131.752	86.1919	74.0672	SOD1	21	31659622	31668931	+	2019	protein_coding	superoxide dismutase 1 [Source:HGNC Symbol;Acc:HGNC:11179]	-
ENSG00000148175	97.5596	83.2102	110.619	184.301	93.8551	77.5757	344.808	283.209	121.508	358.902	36.4762	42.2226	55.4598	43.5014	46.7952	89.7938	32.3426	86.6078	STOM	9	121338988	121370304	-	3198	protein_coding	stomatin [Source:HGNC Symbol;Acc:HGNC:3383]	-
ENSG00000125868	174.325	129.245	267.151	124.17	99.7447	112.025	79.0893	58.6218	158.582	196.888	94.1787	76.5155	112.999	58.9705	103.01	195.203	65.5248	77.9802	DSTN	20	17569863	17609919	+	3851	protein_coding	destrin, actin depolymerizing factor [Source:HGNC Symbol;Acc:HGNC:15750]	-
ENSG00000185664	67.9825	126.37	310.165	71.5435	140.162	19.2247	472.923	366.69	93.6242	115.744	0.785977	0.286162	7.23091	2.89428	0.811558	161.58	1.88052	223.15	PMEL	12	55954105	55973317	-	3901	protein_coding	premelanosome protein [Source:HGNC Symbol;Acc:HGNC:10880]	-
ENSG00000182899	121.451	111.699	164.658	136.366	108.357	99.1418	134.623	125.705	79.53	105.68	89.0419	200.595	114.666	65.1405	129.534	248.135	74.5844	70.3371	RPL35A	3	197949980	197956610	+	3109	protein_coding	ribosomal protein L35a [Source:HGNC Symbol;Acc:HGNC:10345]	-
ENSG00000123144	167.8	117.122	149.37	170.22	156.268	101.923	147.107	157.141	116.526	113.383	85.6885	121.16	103.221	75.6053	122.297	95.0491	71.21	90.24	TRIR	19	12730640	12734775	-	1402	protein_coding	telomerase RNA component interacting RNase [Source:HGNC Symbol;Acc:HGNC:28424]	-
ENSG00000120885	130.057	95.9601	147.802	170.635	72.7685	99.0762	124.821	147.128	149.635	105.033	126.932	112.079	61.7499	103.946	295.657	62.2638	60.7572	94.8683	CLU	8	27596917	27615031	-	6616	protein_coding	clusterin [Source:HGNC Symbol;Acc:HGNC:2095]	-
ENSG00000074800	87.7543	46.0567	91.6482	101.977	41.9079	75.8416	118.739	64.1244	83.8711	115.279	276.015	103.174	122.127	238.244	272.196	49.4304	185.618	75.0792	ENO1	1	8861000	8879250	-	5276	protein_coding	enolase 1 [Source:HGNC Symbol;Acc:HGNC:3350]	-
ENSG00000182492	208.835	255.866	192.471	63.8448	125.239	158.851	129.603	93.4945	52.3666	48.3879	95.0142	101.028	77.7301	78.5177	171.939	27.4957	78.9436	179.933	BGN	X	153494939	153509554	+	2453	protein_coding	biglycan [Source:HGNC Symbol;Acc:HGNC:1044]	-
ENSG00000185201	168.087	133	185.164	199.17	176.178	138.646	101.22	108.068	123.486	111.032	64.4001	143.398	84.2986	73.0581	86.9562	87.3901	46.3782	105.443	IFITM2	11	307631	315272	+	1543	protein_coding	interferon induced transmembrane protein 2 [Source:HGNC Symbol;Acc:HGNC:5413]	-
ENSG00000122026	62.1537	77.2848	100.225	69.455	74.1437	101.102	114.463	73.4451	57.9379	139.683	105.203	288.696	170.914	75.1465	155.985	291.719	88.8478	75.2137	RPL21	13	27251309	27256691	+	2249	protein_coding	ribosomal protein L21 [Source:HGNC Symbol;Acc:HGNC:10313]	-
ENSG00000111404	334.916	72.1841	59.0151	244.264	87.2307	295.392	31.1966	55.2186	337.635	374.494	6.65799	15.7346	72.964	6.23133	4.21742	60.6953	9.25226	51.2787	RERGL	12	18080869	18320107	-	1549	protein_coding	RERG like [Source:HGNC Symbol;Acc:HGNC:26213]	-
ENSG00000087460	224.442	156.239	144.992	189.507	210.176	215.896	82.3768	141.769	160.764	76.0055	68.4773	46.6284	64.4543	57.377	77.1779	78.5355	51.6423	61.6859	GNAS	20	58839718	58911192	+	13320	protein_coding	GNAS complex locus [Source:HGNC Symbol;Acc:HGNC:4392]	-
ENSG00000133392	216.326	198.752	366.433	163.913	250.392	122.827	43.9142	51.8141	249.872	178.549	5.70603	5.27115	48.6551	8.16855	7.63581	93.5368	5.67155	88.1016	MYH11	16	15703172	15857033	-	16104	protein_coding	myosin heavy chain 11 [Source:HGNC Symbol;Acc:HGNC:7569]	-
ENSG00000107372	178.295	139.396	149.338	119.876	200.926	102.05	130.727	221.981	172.085	164.357	34.758	33.4687	84.9311	62.8463	44.5309	107.148	43.609	114.14	ZFAND5	9	72351425	72365235	-	7053	protein_coding	zinc finger AN1-type containing 5 [Source:HGNC Symbol;Acc:HGNC:13008]	-
ENSG00000146066	150.058	113.255	166.444	204.279	161.501	142.281	133.771	204.871	125.672	115.388	67.7368	51.1784	73.7316	60.9137	81.6222	107.7	56.8732	66.9315	HIGD2A	5	176388747	176389771	+	668	protein_coding	HIG1 hypoxia inducible domain family member 2A [Source:HGNC Symbol;Acc:HGNC:28311]	-
ENSG00000196205	71.2961	73.1445	99.5451	96.8741	94.4592	35.4009	142.39	85.4033	51.6878	173.861	156.76	189.267	155.847	84.7602	170.04	221.417	105.069	69.5085	EEF1A1P5	9	133019486	133020874	+	1389	processed_pseudogene	eukaryotic translation elongation factor 1 alpha 1 pseudogene 5 [Source:HGNC Symbol;Acc:HGNC:3200]	-
ENSG00000166681	90.7622	80.1649	165.785	105.742	56.0996	60.5787	113.729	81.7425	91.8532	156.983	188.878	81.8718	129.653	116.8	155.456	182.716	131.892	80.4279	BEX3	X	103376340	103378077	+	1080	protein_coding	brain expressed X-linked 3 [Source:HGNC Symbol;Acc:HGNC:13388]	-
ENSG00000140990	161.322	99.2993	172.2	207.563	133.213	142.491	146.541	155.158	139.819	117.135	86.3995	43.166	78.3171	57.4357	89.3268	95.3637	65.2001	80.7241	NDUFB10	16	1959508	1961975	+	1070	protein_coding	NADH:ubiquinone oxidoreductase subunit B10 [Source:HGNC Symbol;Acc:HGNC:7696]	-
ENSG00000026025	291.674	189.088	102.408	142.75	97.8937	174.572	172.657	183.269	77.1612	89.4315	36.2696	126.121	63.8553	33.684	60.9885	115.348	26.2031	85.6775	VIM	10	17228259	17237593	+	5158	protein_coding	vimentin [Source:HGNC Symbol;Acc:HGNC:12692]	-
ENSG00000157227	241.635	96.7924	180.485	201.82	86.9383	246.049	193.472	174.922	104.466	255.859	12.2488	35.3434	44.4598	13.043	11.8313	44.1254	16.3464	95.9136	MMP14	14	22836557	22849027	+	4464	protein_coding	matrix metallopeptidase 14 [Source:HGNC Symbol;Acc:HGNC:7160]	-
ENSG00000170315	122.64	71.6609	136.875	147.516	45.5036	59.2944	198.094	103.006	113.023	184.674	119.708	94.7767	142.301	92.6234	96.7223	133.682	102.829	82.8584	UBB	17	16380798	16382745	+	1621	protein_coding	ubiquitin B [Source:HGNC Symbol;Acc:HGNC:12463]	-
ENSG00000197728	132.414	106.611	125.099	162.153	143.107	152.87	171.074	156.351	85.2641	62.5481	175.754	40.0562	58.0467	37.6126	69.0019	186.888	89.0714	90.2867	RPS26	12	56041351	56044697	+	2053	protein_coding	ribosomal protein S26 [Source:HGNC Symbol;Acc:HGNC:10414]	-
ENSG00000105701	161.162	127.056	167.07	157.247	163.731	194.829	99.2927	122.187	129.96	113.832	88.99	72.19	84.6852	68.2613	91.9501	47.0818	74.8153	76.5507	FKBP8	19	18531751	18544077	-	2902	protein_coding	FK506 binding protein 8 [Source:HGNC Symbol;Acc:HGNC:3724]	-
ENSG00000127884	102.307	56.9826	115.558	197.147	65.9838	109.239	288.1	185.71	98.1216	198.65	85.4997	50.2527	129.638	61.062	71.8199	52.139	98.9972	72.7793	ECHS1	10	133362480	133373689	-	1617	protein_coding	enoyl-CoA hydratase, short chain 1 [Source:HGNC Symbol;Acc:HGNC:3151]	-
ENSG00000164587	105.613	104.535	158.616	113.994	112.934	86.1114	115.176	116.245	90.6735	93.769	100.383	184.009	104.077	66.706	142.389	205.778	77.0417	61.833	RPS14	5	150442635	150449756	-	5099	protein_coding	ribosomal protein S14 [Source:HGNC Symbol;Acc:HGNC:10387]	-
ENSG00000184076	146.604	79.9804	139.334	230.432	114.483	169.914	160.82	182.529	94.1676	121.019	84.7167	52.2856	84.4527	54.0858	85.5061	104.813	56.1062	64.6616	UQCR10	22	29767369	29770413	+	975	protein_coding	ubiquinol-cytochrome c reductase, complex III subunit X [Source:HGNC Symbol;Acc:HGNC:30863]	-
ENSG00000237973	232.79	116.35	84.2278	173.4	150.18	367.923	57.6584	64.1209	112.519	41.8733	55.4582	30.2351	136.184	42.2681	72.9194	56.9244	84.9166	140.815	MTCO1P12	1	631074	632616	+	1543	unprocessed_pseudogene	MT-CO1 pseudogene 12 [Source:HGNC Symbol;Acc:HGNC:52014]	-
ENSG00000131171	206.08	119.734	173.393	172.29	99.7522	133.28	105.039	114.147	110.679	146.492	59.7839	55.8401	80.3634	39.4724	63.5786	227.604	38.6507	67.8134	SH3BGRL	X	81201943	81298547	+	2304	protein_coding	SH3 domain binding glutamate rich protein like [Source:HGNC Symbol;Acc:HGNC:10823]	-
ENSG00000105640	79.4553	101.014	131.736	99.908	90.8544	55.93	138.489	109.027	74.919	103.225	94.4267	237.894	119.12	68.3798	156.912	189.362	74.3679	86.4044	RPL18A	19	17859876	17864153	+	3527	protein_coding	ribosomal protein L18a [Source:HGNC Symbol;Acc:HGNC:10311]	-
ENSG00000177469	190.122	117.022	179.144	124.261	95.2903	217.875	131.978	89.8749	140.64	229.487	46.4924	72.2728	73.7212	46.2084	64.6269	47.6658	36.4621	107.632	CAVIN1	17	42402452	42423517	-	3828	protein_coding	caveolae associated protein 1 [Source:HGNC Symbol;Acc:HGNC:9688]	-
ENSG00000099624	154.45	104.604	147.448	215.631	162.384	248.5	118.822	152.035	133.275	87.2269	68.4865	35.5361	70.6568	58.8783	70.3308	42.4893	61.3216	67.0586	ATP5F1D	19	1241746	1244826	+	2250	protein_coding	ATP synthase F1 subunit delta [Source:HGNC Symbol;Acc:HGNC:837]	-
ENSG00000102265	260.671	167.729	207.243	149.891	167.357	164.632	87.673	67.407	110.81	81.2282	23.3034	151.251	67.7485	30.4277	53.4154	78.8493	16.1731	112.102	TIMP1	X	47582313	47586789	+	1541	protein_coding	TIMP metallopeptidase inhibitor 1 [Source:HGNC Symbol;Acc:HGNC:11820]	-
ENSG00000125691	110.742	112.866	180.424	131.501	114.018	75.1484	131.35	129.314	102.599	108.098	74.614	141.99	101.703	54.6221	106.682	185.866	63.46	64.7234	RPL23	17	38847865	38853843	-	5979	protein_coding	ribosomal protein L23 [Source:HGNC Symbol;Acc:HGNC:10316]	-
ENSG00000099860	348.163	74.8162	70.7012	142.186	72.1367	99.3666	176.675	163.803	67.8292	106.414	69.8796	26.5417	69.1697	96.4231	81.1839	29.8499	47.4006	240.376	GADD45B	19	2476122	2478259	+	2138	protein_coding	growth arrest and DNA damage inducible beta [Source:HGNC Symbol;Acc:HGNC:4096]	-
ENSG00000165678	108.628	50.5713	110.03	139.411	45.3705	76.6489	188.938	101.079	98.4701	218.952	139.303	79.0156	153.079	77.3179	99.1348	108.507	98.8539	79.7481	GHITM	10	84139440	84153245	+	2128	protein_coding	growth hormone inducible transmembrane protein [Source:HGNC Symbol;Acc:HGNC:17281]	-
ENSG00000196154	196.112	174.508	104.785	97.5138	43.7679	128.222	73.6708	74.9658	40.9216	45.8673	145.713	106.912	39.8264	112.83	378.289	81.7539	40.3351	81.8316	S100A4	1	153543613	153550136	-	1025	protein_coding	S100 calcium binding protein A4 [Source:HGNC Symbol;Acc:HGNC:10494]	-
ENSG00000067560	126.685	76.6208	110.246	107.697	62.8807	101.292	172.24	95.8398	86.5324	175.31	106.154	151.717	116.834	83.1347	112.766	111.929	79.2895	84.0091	RHOA	3	49359145	49412998	-	2582	protein_coding	ras homolog family member A [Source:HGNC Symbol;Acc:HGNC:667]	-
ENSG00000166482	170.874	280.892	239.264	58.9955	160.79	79.2445	80.078	204.803	147.954	64.5868	13.2762	68.4297	43.1523	16.9741	53.1711	169.197	13.0937	91.9924	MFAP4	17	19383442	19387240	-	2152	protein_coding	microfibril associated protein 4 [Source:HGNC Symbol;Acc:HGNC:7035]	-
ENSG00000005022	76.4491	51.549	92.4267	86.6293	26.1498	55.8272	159.21	61.2102	83.2537	209.719	195.549	76.4677	194.771	125.51	104.525	103.657	167.188	69.5628	SLC25A5	X	119468400	119471319	+	1500	protein_coding	solute carrier family 25 member 5 [Source:HGNC Symbol;Acc:HGNC:10991]	-
ENSG00000111669	102.773	60.0675	131.894	140.462	61.8908	96.4982	137.471	104.697	96.5644	181.343	125.707	79.9682	125.509	102.771	110.592	77.3067	110.318	83.7894	TPI1	12	6867119	6870948	+	2700	protein_coding	triosephosphate isomerase 1 [Source:HGNC Symbol;Acc:HGNC:12009]	-
ENSG00000233927	106.586	91.4054	49.3116	122.198	91.7425	223.565	54.6312	212.625	28.9608	92.7212	80.284	257.216	102.576	22.2533	119.073	164.694	71.6238	29.2923	RPS28	19	8321158	8323340	+	2119	protein_coding	ribosomal protein S28 [Source:HGNC Symbol;Acc:HGNC:10418]	-
ENSG00000182154	157.953	102.345	103.228	206.256	141.77	186.907	141.704	187.729	108.113	70.23	70.1257	37.0042	64.9956	65.4328	68.4895	57.4529	61.517	85.5776	MRPL41	9	137551199	137552555	+	1262	protein_coding	mitochondrial ribosomal protein L41 [Source:HGNC Symbol;Acc:HGNC:14492]	-
ENSG00000108654	102.163	156.8	108.206	106.725	126.185	85.027	96.7009	122.105	168.87	95.5338	59.4031	82.4935	82.6416	107.372	50.7011	179.438	71.8541	107.183	DDX5	17	64499616	64508199	-	7388	protein_coding	DEAD-box helicase 5 [Source:HGNC Symbol;Acc:HGNC:2746]	-
ENSG00000150201	0.243552	0.489202	0	0.0820506	0.14351	0	0.135574	0	0.072044	0.0652685	474.11	16.2543	57.9462	557.127	621.924	1.60641	138.756	23.938	FXYD4	10	43371642	43376335	+	827	protein_coding	FXYD domain containing ion transport regulator 4 [Source:HGNC Symbol;Acc:HGNC:4028]	-
ENSG00000129562	97.6343	54.7647	119.119	83.1402	48.3985	61.0605	136.195	96.9038	68.2815	145.698	157.824	129.581	152.822	89.7043	149.699	138.554	100.231	57.6714	DAD1	14	22564905	22589269	-	808	protein_coding	defender against cell death 1 [Source:HGNC Symbol;Acc:HGNC:2664]	-
ENSG00000104904	126.384	78.3885	122.996	157.297	71.5861	140.275	182.358	163.676	78.4984	125.501	77.945	97.4665	81.855	57.4722	105.243	77.2391	56.7123	81.6725	OAZ1	19	2269509	2273490	+	3436	protein_coding	ornithine decarboxylase antizyme 1 [Source:HGNC Symbol;Acc:HGNC:8095]	-
ENSG00000142156	95.2866	225.134	169.712	91.4651	172.116	105.032	118.982	214.514	135.653	110.591	21.2413	42.7524	67.3271	31.4073	17.1081	97.5542	46.009	100.484	COL6A1	21	45981737	46005050	+	5343	protein_coding	collagen type VI alpha 1 chain [Source:HGNC Symbol;Acc:HGNC:2211]	-
ENSG00000235174	69.7214	58.6757	134.678	68.2908	41.8433	69.8104	150.93	124.04	51.9419	104.84	73.5553	200.066	118.244	78.3358	150.757	206.023	66.9563	74.97	RPL39P3	6	73373108	73373263	-	156	processed_pseudogene	ribosomal protein L39 pseudogene 3 [Source:HGNC Symbol;Acc:HGNC:21383]	-
ENSG00000164111	125.471	104.176	126.607	112.385	81.9904	58.927	194.953	193.423	97.8737	127.115	69.1022	89.1631	75.2344	59.0016	81.987	121.004	46.2444	74.8263	ANXA5	4	121667955	121697113	-	3034	protein_coding	annexin A5 [Source:HGNC Symbol;Acc:HGNC:543]	-
ENSG00000125995	170.717	114.398	152.997	173.893	160.864	125.283	115.553	159.474	78.0826	66.5101	64.059	64.6017	66.639	43.7722	70.5106	105.905	53.2882	49.98	ROMO1	20	35699272	35700984	+	702	protein_coding	reactive oxygen species modulator 1 [Source:HGNC Symbol;Acc:HGNC:16185]	-
ENSG00000179010	105.931	78.6093	119.983	111.483	73.6235	74.1441	120.249	88.2825	97.7972	154.775	117.601	97.8091	115.89	80.1651	127.041	107.369	91.1809	73.0498	MRFAP1	4	6640091	6642745	+	2655	protein_coding	Morf4 family associated protein 1 [Source:HGNC Symbol;Acc:HGNC:24549]	-
ENSG00000166441	106.482	113.573	151.342	114.118	118.65	90.5551	108.862	117.555	76.3786	77.81	71.2825	141.415	80.4581	51.4726	109.663	185.141	51.5743	66.553	RPL27A	11	8682411	8714759	+	7193	protein_coding	ribosomal protein L27a [Source:HGNC Symbol;Acc:HGNC:10329]	-
ENSG00000136156	74.7774	73.4384	77.5596	85.8688	58.7538	56.1247	105.763	128.672	61.7675	88.6592	186.896	126.758	142.384	86.1424	223.023	90.7332	95.7849	65.5729	ITM2B	13	48232612	48270357	+	10706	protein_coding	integral membrane protein 2B [Source:HGNC Symbol;Acc:HGNC:6174]	-
ENSG00000101400	245.565	77.1093	110.059	217.069	86.0222	315.076	122.341	107.074	154.599	177.073	9.3031	11.5786	38.9207	6.21992	9.76292	34.6241	15.5579	85.7517	SNTA1	20	33407955	33443892	-	2342	protein_coding	syntrophin alpha 1 [Source:HGNC Symbol;Acc:HGNC:11167]	-
ENSG00000111843	115.422	78.441	162.61	151.687	72.0542	67.8262	122.899	122.705	100.894	135.576	95.5144	81.3013	92.1313	67.7726	106.173	120.295	62.5942	67.1842	TMEM14C	6	10722915	10731129	+	1321	protein_coding	transmembrane protein 14C [Source:HGNC Symbol;Acc:HGNC:20952]	-
ENSG00000230202	92.3517	144.139	164.354	64.8496	109.669	188.852	113.894	65.5538	69.8876	69.0086	43.7118	87.8255	102.839	31.9465	108.456	197.701	102.802	63.6118	AL450405.1	6	117998975	117999448	+	474	processed_pseudogene	ribosomal protein L29 (RPL29) pseudogene	-
ENSG00000126458	213.688	115.398	172.731	169.055	153.111	158.748	92.7887	93.6082	124.503	93.7153	39.3675	71.8148	69.6725	32.177	53.6746	58.8047	28.0185	75.4062	RRAS	19	49635292	49640201	-	1160	protein_coding	RAS related [Source:HGNC Symbol;Acc:HGNC:10447]	-
ENSG00000169976	104.729	63.3418	121.805	117.989	46.6682	125.719	125.225	78.9111	89.3276	122.597	119.592	110.611	121.197	74.178	121.896	128.515	89.0324	54.7603	SF3B5	6	144094881	144095573	-	693	protein_coding	splicing factor 3b subunit 5 [Source:HGNC Symbol;Acc:HGNC:21083]	-
ENSG00000163399	25.5944	17.7741	29.8997	29.5964	17.9552	17.5778	21.1855	21.1574	29.1707	43.0121	379.166	94.346	287.163	271.716	195.036	19.1338	272.699	39.3364	ATP1A1	1	116372668	116410261	+	7261	protein_coding	ATPase Na+/K+ transporting subunit alpha 1 [Source:HGNC Symbol;Acc:HGNC:799]	-
ENSG00000120738	179.081	109.636	24.2531	24.089	77.4388	37.0975	111.28	13.9951	44.6378	23.3591	108.22	65.9159	70.721	421.321	71.9673	52.3174	71.7277	296.044	EGR1	5	138465490	138469315	+	3138	protein_coding	early growth response 1 [Source:HGNC Symbol;Acc:HGNC:3238]	zf-C2H2
ENSG00000177697	240.767	85.0646	128.72	124.064	62.0236	144.873	133.017	98.4452	95.1955	166.262	75.9128	69.7934	68.8772	68.7988	66.2543	45.2314	51.3457	71.8645	CD151	11	832843	839831	+	3938	protein_coding	CD151 molecule (Raph blood group) [Source:HGNC Symbol;Acc:HGNC:1630]	-
ENSG00000129757	35.7371	61.7141	99.7417	101.373	100.076	35.525	298.782	301.782	135.198	248.778	21.2595	42.5714	91.6035	23.2819	28.9995	31.5897	32.6822	104.545	CDKN1C	11	2883213	2885773	-	2478	protein_coding	cyclin dependent kinase inhibitor 1C [Source:HGNC Symbol;Acc:HGNC:1786]	-
ENSG00000136888	123.886	97.4999	147.887	117.461	104.632	111.142	105.977	115.356	79.7602	118.46	98.2162	72.639	87.1407	58.6285	108.706	128.778	57.703	57.7858	ATP6V1G1	9	114587746	114598373	+	1305	protein_coding	ATPase H+ transporting V1 subunit G1 [Source:HGNC Symbol;Acc:HGNC:864]	-
ENSG00000179085	151.225	105.289	147.168	174.658	184.321	130.785	91.5704	117.676	103.452	63.0889	67.0699	56.085	73.1717	54.385	91.7789	80.0124	48.5041	42.6	DPM3	1	155139891	155140595	-	622	protein_coding	dolichyl-phosphate mannosyltransferase subunit 3 [Source:HGNC Symbol;Acc:HGNC:3007]	-
ENSG00000167779	209.997	57.4093	79.4267	222.977	59.2973	237.948	120.908	239.101	128.545	73.8675	26.1962	81.3462	48.695	12.7304	59.1005	31.1284	10.4311	82.4544	IGFBP6	12	53097436	53102345	+	1346	protein_coding	insulin like growth factor binding protein 6 [Source:HGNC Symbol;Acc:HGNC:5475]	-
ENSG00000164919	157.271	112.029	162.5	196.331	136.625	138.474	119.141	162.043	113.37	82.3211	46.2136	29.1428	55.0564	27.0051	41.7949	124.824	29.536	46.0126	COX6C	8	99873200	99894062	-	3066	protein_coding	cytochrome c oxidase subunit 6C [Source:HGNC Symbol;Acc:HGNC:2285]	-
ENSG00000072778	88.516	75.8829	84.5496	184.431	67.3918	124.526	166.463	143.845	85.8742	126.904	104.877	49.9455	57.1732	114.064	71.9541	36.2347	72.7385	123.078	ACADVL	17	7217125	7225273	+	4865	protein_coding	acyl-CoA dehydrogenase very long chain [Source:HGNC Symbol;Acc:HGNC:92]	-
ENSG00000129538	74.6288	67.0926	59.1364	146.435	37.3543	66.1779	322.065	230.421	46.7623	126.018	61.5095	94.7251	86.4118	62.2109	79.3157	96.8996	40.1626	76.1616	RNASE1	14	20801228	20803278	-	1506	protein_coding	ribonuclease A family member 1, pancreatic [Source:HGNC Symbol;Acc:HGNC:10044]	-
ENSG00000118418	106.668	124.533	90.3357	117.443	113.357	135.959	72.7008	111.788	128.268	88.7906	76.1897	79.6779	84.3302	58.9047	77.0633	137.667	77.6645	90.829	HMGN3	6	79201245	79234738	-	1014	protein_coding	high mobility group nucleosomal binding domain 3 [Source:HGNC Symbol;Acc:HGNC:12312]	Others
ENSG00000075785	127.31	76.9458	117.109	131.741	96.6236	108.162	158.791	132.117	90.9385	165.646	73.1977	75.753	80.0927	54.2011	77.2001	69.2441	57.3617	72.7056	RAB7A	3	128726122	128814796	+	2717	protein_coding	RAB7A, member RAS oncogene family [Source:HGNC Symbol;Acc:HGNC:9788]	-
ENSG00000119421	150.108	83.2269	141.942	209.678	96.1133	148.486	110.924	118.355	112.243	102.454	77.39	31.8538	69.4718	55.7656	62.0412	65.8075	56.8711	49.4378	NDUFA8	9	122144058	122159819	-	844	protein_coding	NADH:ubiquinone oxidoreductase subunit A8 [Source:HGNC Symbol;Acc:HGNC:7692]	-
ENSG00000080824	95.5786	51.7758	101.632	84.6388	52.1498	103.003	120.345	80.4977	85.3063	163.042	119.92	111.905	134.579	80.606	115.097	108.024	75.0581	58.3828	HSP90AA1	14	102080738	102139699	-	5248	protein_coding	heat shock protein 90 alpha family class A member 1 [Source:HGNC Symbol;Acc:HGNC:5253]	-
ENSG00000109472	114.895	85.9268	118.232	124.769	60.3444	90.2013	123.32	143.632	98.9986	251.601	77.5209	35.1129	43.9518	44.7558	145.405	95.4556	36.3135	49.9784	CPE	4	165361194	165498320	+	2958	protein_coding	carboxypeptidase E [Source:HGNC Symbol;Acc:HGNC:2303]	-
ENSG00000071082	92.9004	104.898	118.397	98.6142	105.146	69.2394	95.0239	101.24	73.9122	71.1926	86.1734	161.041	88.8377	55.9442	125.748	179.388	58.8339	52.94	RPL31	2	101001715	101024032	+	5791	protein_coding	ribosomal protein L31 [Source:HGNC Symbol;Acc:HGNC:10334]	-
ENSG00000172005	0.138241	0.0694184	0.170147	0.186289	0.610927	0	0.384762	0.0384953	0.0408925	0.0740934	374.837	107.967	193.428	214.486	604.303	6.80347	184.959	48.3291	MAL	2	95025677	95053996	+	1457	protein_coding	mal, T cell differentiation protein [Source:HGNC Symbol;Acc:HGNC:6817]	-
ENSG00000168542	95.8539	158.055	172.906	72.4985	111.896	38.2657	287.838	160.588	74.4427	147.333	15.9264	66.1469	39.805	26.9587	16.6671	133.933	20.1719	92.6888	COL3A1	2	188974320	189012746	+	6811	protein_coding	collagen type III alpha 1 chain [Source:HGNC Symbol;Acc:HGNC:2201]	-
ENSG00000184292	0.771058	0.473232	1.34444	1.12564	2.57457	0.140371	1.33533	0.62028	0.329454	0.711734	489.122	97.2405	78.6759	275.379	590.757	5.71599	142.978	38.4496	TACSTD2	1	58575423	58577773	-	2351	protein_coding	tumor associated calcium signal transducer 2 [Source:HGNC Symbol;Acc:HGNC:11530]	-
ENSG00000101938	48.8472	41.9277	109.059	191.225	40.9334	69.7068	324.432	185.776	86.4676	410.611	2.10948	11.0825	38.8577	0.847132	5.64055	73.9982	4.37488	79.5134	CHRDL1	X	110673856	110795819	-	3920	protein_coding	chordin like 1 [Source:HGNC Symbol;Acc:HGNC:29861]	-
ENSG00000243449	186.746	70.2379	97.3251	190.373	156.375	213.592	107.24	206.693	64.8765	67.0714	59.7906	42.2925	38.3851	41.243	55.4635	31.4147	30.2289	61.0259	C4orf48	4	2041993	2043970	+	540	protein_coding	chromosome 4 open reading frame 48 [Source:HGNC Symbol;Acc:HGNC:34437]	-
ENSG00000135486	67.2578	102.533	99.9548	72.7322	85.4175	49.0354	96.3133	92.4184	71.5714	85.3161	91.2428	135.704	110.584	79.5817	114.673	176.594	101.228	84.1876	HNRNPA1	12	54280193	54287088	+	5093	protein_coding	heterogeneous nuclear ribonucleoprotein A1 [Source:HGNC Symbol;Acc:HGNC:5031]	-
ENSG00000143761	111.216	86.1454	109.841	110.315	85.1687	109.233	106.635	113.799	92.2489	96.5532	95.8571	85.3852	104.443	75.1801	118.348	63.6795	72.5698	75.8583	ARF1	1	228082660	228099212	+	3281	protein_coding	ADP ribosylation factor 1 [Source:HGNC Symbol;Acc:HGNC:652]	-
ENSG00000210164	125.392	107.092	61.0645	202.57	128.282	141.954	56.0598	60.2117	99.0086	55.5646	135.269	19.8365	135.166	89.8558	65.0323	8.26556	126.457	91.3697	MT-TG	MT	9991	10058	+	68	Mt_tRNA	mitochondrially encoded tRNA glycine [Source:HGNC Symbol;Acc:HGNC:7486]	-
ENSG00000130222	209.137	113.499	167.41	294.521	289.974	88.1199	29.9381	117.733	96.3112	33.8071	20.3816	11.2237	29.6323	34.9659	41.1673	28.8721	39.3215	52.4811	GADD45G	9	89605013	89606555	+	1322	protein_coding	growth arrest and DNA damage inducible gamma [Source:HGNC Symbol;Acc:HGNC:4097]	-
ENSG00000138207	19.1363	8.69031	8.68261	214.385	7.9859	12.5833	661.846	376.278	32.9769	165.731	9.04113	14.9587	20.517	1.46673	7.90718	1.44579	53.5444	73.3564	RBP4	10	93591687	93601744	-	1449	protein_coding	retinol binding protein 4 [Source:HGNC Symbol;Acc:HGNC:9922]	-
ENSG00000126709	69.9334	45.3095	51.5869	84.4864	35.3304	40.9178	201.362	319.991	42.2229	160.558	60.6345	106.792	140.993	60.6054	91.1511	66.8681	58.4672	45.7729	IFI6	1	27666061	27672218	-	865	protein_coding	interferon alpha inducible protein 6 [Source:HGNC Symbol;Acc:HGNC:4054]	-
ENSG00000113732	105.114	53.9676	105.813	114.515	53.9666	75.7931	160.442	120.123	75.4759	124.084	100.469	83.397	98.2655	69.1569	107.688	102.004	69.1765	62.7146	ATP6V0E1	5	172983757	173035445	+	1623	protein_coding	ATPase H+ transporting V0 subunit e1 [Source:HGNC Symbol;Acc:HGNC:863]	-
ENSG00000204628	94.219	105.094	117.464	121.971	117.425	83.5913	105.035	113.14	84.4073	81.8666	61.4398	103.867	76.4786	54.4996	97.7108	121.061	66.3768	76.0651	RACK1	5	181236909	181248096	-	5990	protein_coding	receptor for activated C kinase 1 [Source:HGNC Symbol;Acc:HGNC:4399]	-
ENSG00000117519	81.6174	84.5528	163.26	76.2004	62.8751	52.4439	128.357	87.2144	104.717	202.29	72.4341	71.7201	97.45	57.6004	72.4567	144.142	44.4909	73.5121	CNN3	1	94896949	94927278	-	2838	protein_coding	calponin 3 [Source:HGNC Symbol;Acc:HGNC:2157]	-
ENSG00000167676	97.2289	43.0735	72.5467	193.236	72.575	174.625	480.147	219.718	85.8702	139.973	0.60017	1.30912	9.13485	1.00784	3.07603	6.65618	4.10954	68.6888	PLIN4	19	4502180	4518465	-	6502	protein_coding	perilipin 4 [Source:HGNC Symbol;Acc:HGNC:29393]	-
ENSG00000138029	101.838	53.2653	95.1214	194.737	55.6811	114.464	163.621	120.248	135.532	167.077	64.1592	25.6583	69.8604	42.9009	35.5992	79.3901	46.3347	105.901	HADHB	2	26243170	26290468	+	4280	protein_coding	hydroxyacyl-CoA dehydrogenase trifunctional multienzyme complex subunit beta [Source:HGNC Symbol;Acc:HGNC:4803]	-
ENSG00000111775	161.054	76.3837	111.132	193.369	106.497	154.693	111.244	147.772	70.5744	88.3552	67.4027	34.608	64.5674	41.5424	55.5242	86.4529	46.8833	45.3676	COX6A1	12	120438090	120440742	+	1344	protein_coding	cytochrome c oxidase subunit 6A1 [Source:HGNC Symbol;Acc:HGNC:2277]	-
ENSG00000255302	123.702	87.1684	126.811	114.835	66.2619	60.567	104.996	100.362	107.883	134.802	75.2838	70.0532	84.4625	56.5116	83.8411	134.5	61.5206	69.4749	EID1	15	48877886	48880183	+	2298	protein_coding	EP300 interacting inhibitor of differentiation 1 [Source:HGNC Symbol;Acc:HGNC:1191]	-
ENSG00000117450	156.379	51.4352	92.1087	134.597	44.1746	63.0428	128.031	78.53	81.972	106.89	113.454	68.2418	83.8375	106.532	144.847	75.9393	71.2135	61.6335	PRDX1	1	45511036	45523047	-	1522	protein_coding	peroxiredoxin 1 [Source:HGNC Symbol;Acc:HGNC:9352]	-
ENSG00000175899	151.084	57.8591	69.3345	109.043	28.2206	74.9171	164.939	70.8299	56.0433	166.843	52.8233	106.775	124.513	78.601	99.9298	55.2742	77.4241	113.487	A2M	12	9067664	9116229	-	6384	protein_coding	alpha-2-macroglobulin [Source:HGNC Symbol;Acc:HGNC:7]	-
ENSG00000118523	110.741	52.4307	50.4233	10.792	14.5626	32.9448	113.845	13.932	44.9337	34.0847	51.2426	313.303	154.094	101.748	128.09	77.6164	68.2519	273.002	CTGF	6	131948176	131951373	-	2339	protein_coding	connective tissue growth factor [Source:HGNC Symbol;Acc:HGNC:2500]	-
ENSG00000254999	88.8654	49.669	114.452	91.3	38.9353	110.941	136.262	92.2056	66.732	130.412	91.0282	99.4394	94.594	65.0326	107.392	119.929	72.5384	59.3816	BRK1	3	10115592	10127190	+	1233	protein_coding	BRICK1, SCAR/WAVE actin nucleating complex subunit [Source:HGNC Symbol;Acc:HGNC:23057]	-
ENSG00000145741	87.6047	90.7905	102.096	101.165	78.7289	56.5182	117.278	97.3291	82.548	94.3668	80.5401	114.596	86.8216	60.1604	103.865	149.001	60.9099	63.5304	BTF3	5	73498408	73505635	+	2467	protein_coding	basic transcription factor 3 [Source:HGNC Symbol;Acc:HGNC:1125]	-
ENSG00000065534	113.277	127.009	212.066	127.229	124.84	77.5605	49.0343	50.4173	179.279	279.698	6.73986	9.1822	46.8285	4.9496	7.42664	137.358	6.33167	60.8664	MYLK	3	123610049	123884331	-	22167	protein_coding	myosin light chain kinase [Source:HGNC Symbol;Acc:HGNC:7590]	-
ENSG00000184983	137.74	67.2855	116.686	175.246	80.1276	100.157	131.836	120.652	93.0734	109.059	78.05	40.7647	67.8649	50.4367	60.0471	81.9127	53.9002	54.4174	NDUFA6	22	42085525	42090955	-	1416	protein_coding	NADH:ubiquinone oxidoreductase subunit A6 [Source:HGNC Symbol;Acc:HGNC:7690]	-
ENSG00000214485	50.961	54.8363	86.285	62.5873	32.0936	29.3786	130.281	72.6811	71.0658	106.942	103.547	167.809	122.619	58.9171	132.459	185.232	73.0359	73.7155	RPL7P1	5	150094302	150095048	+	747	processed_pseudogene	ribosomal protein L7 pseudogene 1 [Source:HGNC Symbol;Acc:HGNC:10367]	-
ENSG00000165629	105.212	72.7044	97.8398	153.478	67.5818	71.6494	113.349	103.012	102.127	115.287	101.121	54.752	97.9166	67.7857	77.0851	89.2316	66.2523	54.2876	ATP5F1C	10	7788129	7807815	+	2326	protein_coding	ATP synthase F1 subunit gamma [Source:HGNC Symbol;Acc:HGNC:833]	-
ENSG00000198918	69.5538	72.7981	95.2651	80.4382	56.348	35.1438	126.835	109.424	37.6517	69.4819	73.3185	216.772	98.9461	54.5549	106.818	192.643	59.0883	52.1503	RPL39	X	119786504	119791643	-	2141	protein_coding	ribosomal protein L39 [Source:HGNC Symbol;Acc:HGNC:10350]	-
ENSG00000100345	97.386	110.245	104.772	83.457	85.0283	94.5326	100.021	89.5771	93.6613	110.332	70.8387	115.787	91.3194	72.1782	64.9453	38.0046	68.8679	100.954	MYH9	22	36281277	36388067	-	9012	protein_coding	myosin heavy chain 9 [Source:HGNC Symbol;Acc:HGNC:7579]	-
ENSG00000125144	3.75979	0.876569	0.991614	1.35712	19.464	1.32005	1.42018	0.448701	1.90657	2.23105	26.6967	657.386	449.465	15.6445	51.5253	18.2584	172.694	165.44	MT1G	16	56666731	56668065	-	750	protein_coding	metallothionein 1G [Source:HGNC Symbol;Acc:HGNC:7399]	-
ENSG00000161203	145.134	65.0005	162.485	140.877	92.5556	146.497	105.943	96.3136	116.442	118.27	45.4304	38.6697	50.7533	36.5311	61.9911	46.0467	37.0291	71.8764	AP2M1	3	184174689	184184091	+	4756	protein_coding	adaptor related protein complex 2 subunit mu 1 [Source:HGNC Symbol;Acc:HGNC:564]	-
ENSG00000149273	73.4726	71.2408	120.839	77.066	84.28	70.5071	95.7696	85.6349	61.3191	73.0622	64.9706	164.666	94.5447	59.1584	116.712	138.724	67.359	58.4121	RPS3	11	75399486	75422280	+	5894	protein_coding	ribosomal protein S3 [Source:HGNC Symbol;Acc:HGNC:10420]	-
ENSG00000112936	66.1622	60.7378	48.2826	37.4812	45.912	34.088	93.594	97.5814	47.8537	97.8056	42.3379	237.206	144.872	65.4445	48.6647	170.878	80.3751	156.44	C7	5	40909252	40982939	+	5223	protein_coding	complement C7 [Source:HGNC Symbol;Acc:HGNC:1346]	-
ENSG00000126247	136.788	62.4071	99.4857	137.038	82.9209	142.708	115.488	124.383	94.013	85.3265	64.8487	55.1792	63.2242	62.4305	89.6824	28.7067	55.301	72.9801	CAPNS1	19	36139575	36150353	+	3478	protein_coding	calpain small subunit 1 [Source:HGNC Symbol;Acc:HGNC:1481]	-
ENSG00000164733	133.248	57.0799	114.749	127.792	70.7015	138.183	147.576	113.957	74.5477	144.011	41.5715	58.5109	90.79	31.6578	59.5882	49.7411	49.3605	65.8334	CTSB	8	11842524	11869448	-	7428	protein_coding	cathepsin B [Source:HGNC Symbol;Acc:HGNC:2527]	-
ENSG00000169692	38.4612	43.0615	35.4345	141.41	44.5885	56.6693	395.256	261.94	58.2218	175.71	52.8121	28.3529	35.8542	36.963	53.4104	14.0387	41.4219	55.086	AGPAT2	9	136673143	136687423	-	1798	protein_coding	1-acylglycerol-3-phosphate O-acyltransferase 2 [Source:HGNC Symbol;Acc:HGNC:325]	-
ENSG00000136810	137.394	88.5662	117.819	133.632	91.922	95.2905	92.4349	103.433	83.5795	79.7839	61.4261	71.9692	96.3036	44.9359	61.8692	96.0626	63.812	38.7774	TXN	9	110243811	110256640	-	1142	protein_coding	thioredoxin [Source:HGNC Symbol;Acc:HGNC:12435]	-
ENSG00000166819	2.61696	12.6129	8.9936	114.213	4.76669	2.30322	672.393	280.01	48.9102	342.143	0.697391	3.185	4.95821	0.419796	6.90852	1.73595	0.780489	50.9026	PLIN1	15	89664365	89679427	-	3797	protein_coding	perilipin 1 [Source:HGNC Symbol;Acc:HGNC:9076]	-
ENSG00000173372	50.1432	44.5679	57.9806	123.549	58.0351	68.8824	332.436	266.769	30.446	114.277	21.5845	100.34	61.0959	31.6064	27.2199	54.3901	11.1143	96.35	C1QA	1	22636506	22639608	+	1272	protein_coding	complement C1q A chain [Source:HGNC Symbol;Acc:HGNC:1241]	-
ENSG00000182117	87.499	64.0813	100.235	121.994	59.9841	50.187	179.007	157.43	61.6238	122.861	75.9732	72.9602	67.8506	50.9902	90.073	90.8479	42.6191	53.9862	NOP10	15	34341713	34343177	-	554	protein_coding	NOP10 ribonucleoprotein [Source:HGNC Symbol;Acc:HGNC:14378]	-
ENSG00000187479	303.774	118.073	96.2755	90.6841	62.4476	129.873	124.866	67.4947	78.5851	134.707	24.0386	31.9556	79.5983	21.6555	18.687	62.0732	6.35754	92.0671	C11orf96	11	43942505	43944338	+	1834	protein_coding	chromosome 11 open reading frame 96 [Source:HGNC Symbol;Acc:HGNC:38675]	-
ENSG00000167815	72.9453	34.431	104.172	141.807	28.0971	76.9452	237.069	111.907	90.7513	169.204	74.5782	34.7349	71.5352	54.6003	58.2234	32.7621	60.3506	73.282	PRDX2	19	12796820	12801859	-	2093	protein_coding	peroxiredoxin 2 [Source:HGNC Symbol;Acc:HGNC:9353]	-
ENSG00000084234	78.2675	57.7948	85.9092	95.2783	71.0538	68.0765	67.1396	116.534	88.2969	111.165	118.502	72.1039	106.281	76.1658	125.654	45.9955	91.3578	49.47	APLP2	11	130068147	130144811	+	7463	protein_coding	amyloid beta precursor like protein 2 [Source:HGNC Symbol;Acc:HGNC:598]	-
ENSG00000117592	65.0118	71.851	74.5177	101.053	59.8929	51.0286	156.243	146.558	84.7265	147.61	79.566	63.7861	92.2303	55.6686	84.9213	64.1131	63.8116	62.0197	PRDX6	1	173477266	173488807	+	2367	protein_coding	peroxiredoxin 6 [Source:HGNC Symbol;Acc:HGNC:16753]	-
ENSG00000211895	7.74319	25.6057	12.1598	43.3762	17.1097	46.0092	172.634	12.6611	14.4971	21.7123	2.58089	978.249	73.0169	10.5554	3.53391	13.9419	9.08781	58.5999	IGHA1	14	105703995	105708665	-	1422	IG_C_gene	immunoglobulin heavy constant alpha 1 [Source:HGNC Symbol;Acc:HGNC:5478]	-
ENSG00000130176	138.883	165.044	354.982	80.1249	160.923	127.541	38.1176	19.5636	155.008	99.8958	6.06648	3.75392	28.9386	5.72055	10.8268	76.4585	2.20446	48.6756	CNN1	19	11538717	11550323	+	2887	protein_coding	calponin 1 [Source:HGNC Symbol;Acc:HGNC:2155]	-
ENSG00000235655	54.3974	105.572	107.515	71.8183	61.5071	41.1512	80.066	70.8259	89.878	98.8922	131.682	75.1454	96.8561	84.5675	95.9805	152.17	47.1638	37.0518	H3F3AP4	2	174719908	174720318	+	411	processed_pseudogene	H3 histone, family 3A, pseudogene 4 [Source:HGNC Symbol;Acc:HGNC:42980]	-
ENSG00000108953	85.7259	67.8184	91.5864	116.362	96.2234	80.3157	90.1737	102.757	81.4952	98.1464	95.1098	60.2241	83.3423	68.8724	95.3055	69.3591	64.7342	54.5795	YWHAE	17	1344272	1400378	-	3847	protein_coding	tyrosine 3-monooxygenase/tryptophan 5-monooxygenase activation protein epsilon [Source:HGNC Symbol;Acc:HGNC:12851]	-
ENSG00000143256	110.576	115.111	107.748	135.611	130.867	88.3528	96.6349	128.248	83.0782	71.0392	52.4946	48.5056	52.2462	40.6143	67.6215	80.6822	28.3456	52.4554	PFDN2	1	161100556	161118111	-	677	protein_coding	prefoldin subunit 2 [Source:HGNC Symbol;Acc:HGNC:8867]	-
ENSG00000105894	157.403	92.7878	83.1048	82.9878	48.8796	39.301	125.603	240.263	60.9369	214.08	11.553	27.4517	56.9125	12.7428	10.8542	124.295	35.9333	56.9305	PTN	7	137227341	137343865	-	1713	protein_coding	pleiotrophin [Source:HGNC Symbol;Acc:HGNC:9630]	-
ENSG00000112335	96.4442	59.192	110.359	107.752	49.0646	46.4472	156.706	119.118	75.1063	139.953	67.5907	72.699	72.6109	45.07	66.7301	89.9315	44.6788	59.3589	SNX3	6	108211222	108261260	-	1842	protein_coding	sorting nexin 3 [Source:HGNC Symbol;Acc:HGNC:11174]	-
ENSG00000104979	122.326	88.7798	133.454	132.475	133.594	111.246	81.4634	111.22	85.2091	56.8736	56.0321	44.0568	47.5142	41.9762	74.8219	69.8982	39.2299	45.607	C19orf53	19	13774168	13778462	+	1174	protein_coding	chromosome 19 open reading frame 53 [Source:HGNC Symbol;Acc:HGNC:24991]	-
ENSG00000169504	107.154	85.9318	135.106	99.3458	84.9261	66.1861	79.918	76.1643	82.3787	172.174	40.1516	54.3154	77.039	30.8214	54.2992	135.681	43.5132	49.2725	CLIC4	1	24745357	24844324	+	4495	protein_coding	chloride intracellular channel 4 [Source:HGNC Symbol;Acc:HGNC:13518]	-
ENSG00000112695	121.493	60.4908	122.275	138.677	60.916	105.039	119.411	104.296	91.4476	108.937	66.2034	35.1874	69.3247	38.7019	50.1215	97.4603	45.9787	37.2388	COX7A2	6	75237675	75250323	-	1922	protein_coding	cytochrome c oxidase subunit 7A2 [Source:HGNC Symbol;Acc:HGNC:2288]	-
ENSG00000158747	206.309	124.867	166.504	89.8203	127.808	222.158	50.9776	72.3711	104.614	76.5375	8.77187	31.4184	32.364	15.1447	9.307	79.1309	9.82182	45.2105	NBL1	1	19596979	19658456	+	3596	protein_coding	NBL1, DAN family BMP antagonist [Source:HGNC Symbol;Acc:HGNC:7650]	-
ENSG00000067225	103.196	42.1693	100.524	106.11	45.529	115.096	59.9907	44.0272	69.1873	100.422	134.474	51.6904	62.9297	112.539	156.473	24.4005	84.8701	51.4609	PKM	15	72199029	72231822	-	8571	protein_coding	pyruvate kinase M1/2 [Source:HGNC Symbol;Acc:HGNC:9021]	-
ENSG00000100979	156.896	77.6382	142.488	158.731	126.6	93.1854	172.746	173.56	75.8296	59.5	5.70416	34.4318	29.5612	8.45109	11.9055	26.1815	18.6413	89.6317	PLTP	20	45898621	45912155	-	2541	protein_coding	phospholipid transfer protein [Source:HGNC Symbol;Acc:HGNC:9093]	-
ENSG00000131174	138.319	67.1943	132.15	158.443	88.1094	120.863	91.6348	99.8225	109.94	82.9825	60.6202	24.9793	59.4055	35.4624	41.8436	71.7442	40.935	35.6535	COX7B	X	77899438	77907373	+	3024	protein_coding	cytochrome c oxidase subunit 7B [Source:HGNC Symbol;Acc:HGNC:2291]	-
ENSG00000159377	111.287	85.9103	114.101	121.31	92.1469	82.8855	100.819	106.119	91.8002	80.6654	57.1982	48.8195	61.1559	46.267	69.9991	87.5833	48.267	52.8967	PSMB4	1	151399534	151401944	+	2158	protein_coding	proteasome subunit beta 4 [Source:HGNC Symbol;Acc:HGNC:9541]	-
ENSG00000166589	0.128549	0.0829945	0.0169518	0.129921	0.551862	0.045133	0.230005	0.0153412	0.0977797	0.206695	291.189	65.7113	215.114	333.154	241.406	3.32628	259.934	47.301	CDH16	16	66908122	66918984	-	3656	protein_coding	cadherin 16 [Source:HGNC Symbol;Acc:HGNC:1755]	-
ENSG00000277791	132.114	84.2426	126.107	123.856	98.55	90.6206	88.3929	90.9104	96.6224	69.3598	55.5581	54.4429	54.3559	48.9711	77.3603	73.1555	43.0194	46.1369	PSMB3	17	38752736	38764231	+	1179	protein_coding	proteasome subunit beta 3 [Source:HGNC Symbol;Acc:HGNC:9540]	-
ENSG00000114942	75.904	66.3105	91.2971	75.9348	64.5783	62.1251	90.8081	57.6399	62.0383	81.7125	78.2111	168.565	87.0554	56.5309	86.1241	137.92	56.8272	50.7026	EEF1B2	2	206159585	206162928	+	1915	protein_coding	eukaryotic translation elongation factor 1 beta 2 [Source:HGNC Symbol;Acc:HGNC:3208]	-
ENSG00000175756	117.061	62.3884	83.4762	145.063	89.7409	123.384	121.357	102.631	71.6107	82.7928	70.2825	44.9247	64.4897	51.9967	68.3478	38.4216	55.2772	49.9641	AURKAIP1	1	1373730	1375495	-	1669	protein_coding	aurora kinase A interacting protein 1 [Source:HGNC Symbol;Acc:HGNC:24114]	-
ENSG00000133142	77.7513	136.611	210.467	84.9411	106.051	102.293	49.6479	55.2634	110.051	85.8959	33.2646	30.5901	46.1944	28.5038	34.985	167.859	29.6548	48.116	TCEAL4	X	103576231	103587736	+	2518	protein_coding	transcription elongation factor A like 4 [Source:HGNC Symbol;Acc:HGNC:26121]	-
ENSG00000197756	66.6386	66.0805	113.905	79.9471	61.1456	51.1831	93.6734	90.9076	60.8346	71.943	66.6994	120.747	83.5139	46.2832	96.2145	161.467	55.1299	50.7179	RPL37A	2	216498189	216579180	+	6841	protein_coding	ribosomal protein L37a [Source:HGNC Symbol;Acc:HGNC:10348]	-
ENSG00000010282	198.956	52.5305	147.254	156.859	144.341	209.44	64.2041	117.316	154.917	44.3616	0.0160692	0	3.90284	0.0918923	0	17.6919	1.10911	122.269	HHATL	3	42692663	42702827	-	2891	protein_coding	hedgehog acyltransferase like [Source:HGNC Symbol;Acc:HGNC:13242]	-
ENSG00000116717	76.2252	95.0564	105.05	90.715	69.4085	20.0177	136.018	164.44	94.2517	153.296	48.0726	45.0744	68.5966	46.8662	35.0478	92.7091	33.9536	59.0289	GADD45A	1	67685061	67688338	+	2069	protein_coding	growth arrest and DNA damage inducible alpha [Source:HGNC Symbol;Acc:HGNC:4095]	-
ENSG00000178952	81.8914	55.5817	88.5019	112.764	57.5907	89.6237	120.833	81.9951	70.0483	119.268	88.8003	55.0334	81.5032	62.7595	92.118	44.6614	71.194	57.3458	TUFM	16	28842411	28846408	-	2271	protein_coding	Tu translation elongation factor, mitochondrial [Source:HGNC Symbol;Acc:HGNC:12420]	-
ENSG00000136238	94.4131	114.898	121.325	68.5532	101.551	67.7459	83.2976	75.4679	90.4421	109.618	59.1665	62.6151	71.5103	50.9169	69.8109	80.7628	48.0674	59.9937	RAC1	7	6374523	6403977	+	3114	protein_coding	Rac family small GTPase 1 [Source:HGNC Symbol;Acc:HGNC:9801]	-
ENSG00000263266	63.5813	76.4188	110.921	96.3901	81.7592	65.0153	96.9787	99.2319	58.9693	70.3085	58.606	121.093	78.0163	48.2882	79.3727	120.011	56.7208	46.4397	RPS7P1	17	28467822	28468406	+	585	processed_pseudogene	ribosomal protein S7 pseudogene 1 [Source:HGNC Symbol;Acc:HGNC:17081]	-
ENSG00000116288	108.313	66.7322	113.222	135.57	71.6949	74.4491	106.273	101.669	83.1939	86.9442	70.2557	55.3229	62.1718	45.459	73.0827	74.7151	46.677	52.3746	PARK7	1	7954291	7985505	+	2397	protein_coding	Parkinsonism associated deglycase [Source:HGNC Symbol;Acc:HGNC:16369]	-
ENSG00000143384	120.608	76.2908	66.9527	55.7781	58.2824	65.5911	114.595	62.8884	62.4702	81.3051	62.1008	74.9787	91.7977	150.638	50.5051	78.1464	48.371	106.302	MCL1	1	150574551	150579738	-	4371	protein_coding	MCL1, BCL2 family apoptosis regulator [Source:HGNC Symbol;Acc:HGNC:6943]	-
ENSG00000127528	175.134	56.8614	40.14	61.4334	63.1936	75.6756	90.9791	45.526	109.536	46.4609	43.6475	104.297	80.9473	155.21	60.6612	24.434	52.6508	132.995	KLF2	19	16324817	16327874	+	2018	protein_coding	Kruppel like factor 2 [Source:HGNC Symbol;Acc:HGNC:6347]	zf-C2H2
ENSG00000088832	106.245	68.547	93.6492	123.599	54.2984	91.4354	123.758	119.815	63.3952	112.08	50.1516	65.1762	59.7724	50.5824	57.3698	68.6041	41.5126	65.6878	FKBP1A	20	1368978	1393172	-	2577	protein_coding	FK506 binding protein 1A [Source:HGNC Symbol;Acc:HGNC:3711]	-
ENSG00000187837	84.7083	24.4192	48.2678	128.207	38.1744	58.8574	195.598	170.709	50.2072	101.985	213.104	14.1278	31.1017	62.1392	94.2425	10.7445	51.7605	27.5153	HIST1H1C	6	26055787	26056428	-	642	protein_coding	histone cluster 1 H1 family member c [Source:HGNC Symbol;Acc:HGNC:4716]	-
ENSG00000198242	52.922	59.561	91.2301	62.2092	47.616	41.7775	93.5587	57.2991	52.3228	89.8151	82.1205	144.695	89.4484	46.1896	96.9633	192.66	55.6356	49.4595	RPL23A	17	28719393	28724359	+	2824	protein_coding	ribosomal protein L23a [Source:HGNC Symbol;Acc:HGNC:10317]	-
ENSG00000110651	132.035	50.4482	113.315	96.5712	52.656	99.6309	98.4193	97.0951	90.2087	114.619	53.8762	74.6891	71.6097	54.5825	55.8592	30.0054	53.1224	66.4162	CD81	11	2376177	2397419	+	7394	protein_coding	CD81 molecule [Source:HGNC Symbol;Acc:HGNC:1701]	-
ENSG00000187608	171.38	102.164	73.0407	121.218	100.016	72.2451	66.6641	258.325	46.2207	58.8527	31.7935	51.3079	60.2896	31.7607	44.4847	60.0557	21.4257	33.7903	ISG15	1	1001138	1014540	+	941	protein_coding	ISG15 ubiquitin-like modifier [Source:HGNC Symbol;Acc:HGNC:4053]	-
ENSG00000171863	77.7799	90.2567	109.19	107.179	95.2182	69.5899	82.885	100.805	64.958	65.7603	57.0218	98.9488	74.0249	37.077	68.5928	111.773	44.467	44.3976	RPS7	2	3575205	3580920	+	5584	protein_coding	ribosomal protein S7 [Source:HGNC Symbol;Acc:HGNC:10440]	-
ENSG00000128272	84.8453	99.2115	86.4803	90.8524	100.909	88.6729	86.7879	108.449	74.9614	63.9823	45.3288	84.4046	72.0619	50.5643	61.0862	80.0995	53.4327	67.4309	ATF4	22	39519695	39522685	+	2514	protein_coding	activating transcription factor 4 [Source:HGNC Symbol;Acc:HGNC:786]	TF_bZIP
ENSG00000153446	164.778	43.2804	115.976	189.747	92.127	160.935	132.081	125.661	9.42564	133.937	1.57326	7.29089	36.3095	0.53552	1.06971	36.0665	56.2914	84.0171	C16orf89	16	5044122	5066110	-	2067	protein_coding	chromosome 16 open reading frame 89 [Source:HGNC Symbol;Acc:HGNC:28687]	-
ENSG00000104964	115.181	69.6811	103.118	115.501	91.0506	135.014	91.0205	100.466	75.8082	75.5658	55.6806	53.0714	52.9073	48.0292	62.488	34.4403	42.4659	54.3596	AES	19	3052910	3063107	-	5298	protein_coding	amino-terminal enhancer of split [Source:HGNC Symbol;Acc:HGNC:307]	-
ENSG00000240342	92.4977	44.3002	57.3929	51.413	38.8858	36.8871	85.2058	42.5602	52.3955	133.377	70.7675	201.557	94.181	48.1554	92.0433	126.839	54.1092	48.3008	RPS2P5	12	118246084	118246962	+	879	processed_pseudogene	ribosomal protein S2 pseudogene 5 [Source:HGNC Symbol;Acc:HGNC:31386]	-
ENSG00000157514	78.8314	63.039	76.4491	67.144	52.5929	80.2009	92.0294	77.6588	72.3441	113.198	23.0331	106.084	105.589	58.695	77.5398	74.9075	52.3742	97.006	TSC22D3	X	107713221	107777342	-	4766	protein_coding	TSC22 domain family member 3 [Source:HGNC Symbol;Acc:HGNC:3051]	TSC22
ENSG00000087076	129.718	92.2995	145.82	151.497	155.788	113.482	94.6584	175.881	82.7428	63.9634	3.73534	6.57212	27.4138	3.59468	5.33513	48.4237	18.6971	48.2645	HSD17B14	19	48813017	48836678	-	1281	protein_coding	hydroxysteroid 17-beta dehydrogenase 14 [Source:HGNC Symbol;Acc:HGNC:23238]	-
ENSG00000010256	93.1981	45.7423	93.7299	138.522	58.7179	85.4607	111.565	76.4878	89.4995	112.858	76.6036	33.275	75.5527	60.0254	60.7809	36.2063	66.6279	50.6919	UQCRC1	3	48599002	48610976	-	3236	protein_coding	ubiquinol-cytochrome c reductase core protein 1 [Source:HGNC Symbol;Acc:HGNC:12585]	-
ENSG00000130748	136.911	60.9449	104.602	121.178	141.238	178.695	74.1545	99.0627	62.3662	50.1506	43.373	36.6212	43.0237	33.1241	59.1202	38.8424	31.9485	44.6512	TMEM160	19	47045907	47048630	-	663	protein_coding	transmembrane protein 160 [Source:HGNC Symbol;Acc:HGNC:26042]	-
ENSG00000177700	81.0138	36.5336	84.4435	93.8811	36.8935	106.922	185.213	118.02	48.6243	105.449	65.2093	47.7351	65.664	47.4172	79.5587	53.5571	49.4756	52.6456	POLR2L	11	837356	842545	-	1142	protein_coding	RNA polymerase II subunit L [Source:HGNC Symbol;Acc:HGNC:9199]	-
ENSG00000102316	96.8722	82.7546	96.5685	107.3	74.7621	57.7522	62.3522	96.7797	87.3238	78.028	65.3228	53.9173	72.2713	64.7435	60.7471	79.8769	61.3722	56.0856	MAGED2	X	54807599	54816012	+	2940	protein_coding	MAGE family member D2 [Source:HGNC Symbol;Acc:HGNC:16353]	-
ENSG00000122786	132.969	94.1757	171.735	89.5231	82.9983	98.1858	55.7921	43.1754	122.508	122.004	19.7614	35.6918	48.1192	19.779	27.615	121.291	16.2879	51.5933	CALD1	7	134744252	134970728	+	9843	protein_coding	caldesmon 1 [Source:HGNC Symbol;Acc:HGNC:1441]	-
ENSG00000198668	121.94	76.5888	129.188	90.2602	72.4111	81.0469	66.1804	58.1476	97.9733	130.035	56.2175	34.2224	60.295	40.4841	60.5831	86.8271	29.8744	58.826	CALM1	14	90396502	90408261	+	7705	protein_coding	calmodulin 1 [Source:HGNC Symbol;Acc:HGNC:1442]	-
ENSG00000140264	157.782	60.8205	103.276	163.438	103.724	169.846	62.599	117.809	64.8273	51.1485	32.1468	29.6856	36.2108	25.7633	42.1402	57.6406	26.2583	43.2038	SERF2	15	43777087	43802589	+	7347	protein_coding	small EDRK-rich factor 2 [Source:HGNC Symbol;Acc:HGNC:10757]	-
ENSG00000236552	54.4134	54.1245	81.7231	53.6638	42.5668	52.5756	107.173	51.7802	43.1277	80.4363	64.6741	165.912	85.2427	47.3877	92.2112	165.395	51.8369	47.3769	RPL13AP5	10	96750288	96750899	+	612	processed_pseudogene	ribosomal protein L13a pseudogene 5 [Source:HGNC Symbol;Acc:HGNC:23736]	-
ENSG00000189043	100.369	48.4807	114.279	131.59	41.1184	71.297	103.181	60.8667	89.823	122.268	74.7268	36.9123	71.2851	40.3048	58.279	82.8948	50.085	42.7557	NDUFA4	7	10931951	10940256	-	3556	protein_coding	NDUFA4, mitochondrial complex associated [Source:HGNC Symbol;Acc:HGNC:7687]	-
ENSG00000118785	7.43419	0.653657	0.907876	2.33885	2.45445	7.8913	33.9595	3.21398	1.64289	12.2094	148.255	310.181	434.869	144.467	114.145	5.61376	57.8131	50.1004	SPP1	4	87975650	87983426	+	2321	protein_coding	secreted phosphoprotein 1 [Source:HGNC Symbol;Acc:HGNC:11255]	-
ENSG00000163431	111.115	123.582	185.241	136.669	146.807	144.064	28.1076	40.9463	124.367	115.838	3.13528	7.05136	22.2521	4.70531	4.21405	74.978	2.92399	56.7408	LMOD1	1	201896452	201946588	-	3971	protein_coding	leiomodin 1 [Source:HGNC Symbol;Acc:HGNC:6647]	-
ENSG00000053371	99.8982	35.6072	97.8182	96.6213	31.3866	131.931	135.884	71.4243	87.7481	187.086	38.1612	23.0085	56.3056	23.7916	33.1817	58.3834	36.3071	86.3933	AKR7A2	1	19303965	19312146	-	1781	protein_coding	aldo-keto reductase family 7 member A2 [Source:HGNC Symbol;Acc:HGNC:389]	-
ENSG00000163682	98.0349	73.2488	98.9491	115.066	64.3869	47.0179	69.5334	121.009	52.5333	45.8837	76.7236	157.498	52.6342	32.0041	65.4219	102.274	21.4857	36.509	RPL9	4	39452521	39458949	-	5022	protein_coding	ribosomal protein L9 [Source:HGNC Symbol;Acc:HGNC:10369]	-
ENSG00000178719	83.532	44.7477	85.4958	110.739	41.8936	109.047	154.403	123.628	76.5798	111.607	47.0259	34.6962	48.2624	51.1101	53.2749	21.4333	50.3509	82.3665	GRINA	8	143990058	143993415	+	2527	protein_coding	glutamate ionotropic receptor NMDA type subunit associated protein 1 [Source:HGNC Symbol;Acc:HGNC:4589]	-
ENSG00000196126	21.9609	137.106	75.894	6.40462	5.79411	14.7687	42.7861	130.247	8.48379	184.066	16.6319	43.599	211.724	25.0025	160.693	198.647	6.68055	38.0149	HLA-DRB1	6	32578769	32589848	-	1229	protein_coding	major histocompatibility complex, class II, DR beta 1 [Source:HGNC Symbol;Acc:HGNC:4948]	-
ENSG00000082641	113.405	43.4262	79.0206	96.3728	58.9746	120.518	91.4761	65.8512	71.3431	162.32	67.3433	42.9518	81.5396	40.765	45.4125	28.6577	59.3579	58.7171	NFE2L1	17	48048329	48061487	+	5825	protein_coding	nuclear factor, erythroid 2 like 1 [Source:HGNC Symbol;Acc:HGNC:7781]	TF_bZIP
ENSG00000179091	67.887	41.5581	78.0739	110.356	40.0216	82.8792	134.033	64.9764	75.5993	131.185	93.2648	34.0076	79.9495	64.7898	64.8317	38.5227	71.3851	49.995	CYC1	8	144095027	144097525	+	1975	protein_coding	cytochrome c1 [Source:HGNC Symbol;Acc:HGNC:2579]	-
ENSG00000128185	95.6471	66.216	91.1378	112.897	64.3808	114.818	78.2117	70.474	75.5856	76.8962	84.6192	49.5361	63.9376	51.2981	63.8386	66.5048	51.5292	45.2889	DGCR6L	22	20314276	20320080	-	1154	protein_coding	DiGeorge syndrome critical region gene 6 like [Source:HGNC Symbol;Acc:HGNC:18551]	-
ENSG00000182612	198.729	36.2365	101.565	224.818	104.263	221.272	71.2415	96.8087	78.5909	58.0722	1.35109	0.333287	8.0421	1.30637	1.40854	7.51636	1.3003	98.7832	TSPAN10	17	81637171	81648749	+	4745	protein_coding	tetraspanin 10 [Source:HGNC Symbol;Acc:HGNC:29942]	-
ENSG00000084623	102.402	66.8421	116.658	110.261	94.2238	69.494	84.0735	85.9684	76.4356	73.7529	55.5048	56.6248	54.0546	43.5067	77.1408	53.5251	41.3442	49.8252	EIF3I	1	32221928	32231604	+	1725	protein_coding	eukaryotic translation initiation factor 3 subunit I [Source:HGNC Symbol;Acc:HGNC:3272]	-
ENSG00000134308	76.8895	49.8257	92.9067	67.4557	39.4807	66.9331	94.7004	68.6572	56.1325	121.881	82.6379	78.6078	76.8463	52.747	77.2584	100.78	53.1127	51.1913	YWHAQ	2	9583972	9631014	-	2713	protein_coding	tyrosine 3-monooxygenase/tryptophan 5-monooxygenase activation protein theta [Source:HGNC Symbol;Acc:HGNC:12854]	-
ENSG00000181061	80.6872	48.8806	124.026	140.492	59.0934	76.9373	77.6805	98.6807	87.2542	107.793	61.1001	35.4333	66.605	37.5361	68.733	65.8607	31.2957	37.2388	HIGD1A	3	42784298	42804531	-	1675	protein_coding	HIG1 hypoxia inducible domain family member 1A [Source:HGNC Symbol;Acc:HGNC:29527]	-
ENSG00000150093	83.5135	71.7976	72.3378	78.2414	37.7017	53.9544	136.442	86.5807	54.2577	170.399	46.3092	73.7819	68.9562	33.8318	53.9975	101.529	34.7051	46.9693	ITGB1	10	32900319	33005792	-	6011	protein_coding	integrin subunit beta 1 [Source:HGNC Symbol;Acc:HGNC:6153]	-
ENSG00000111897	62.0454	49.1849	69.3055	54.5745	38.6277	31.7441	111.101	67.0655	60.1882	126.623	90.9572	84.8714	101.296	50.5435	97.1404	102.893	60.027	43.1654	SERINC1	6	122443354	122471822	-	3137	protein_coding	serine incorporator 1 [Source:HGNC Symbol;Acc:HGNC:13464]	-
ENSG00000123349	87.3008	81.9913	87.0963	83.0732	90.7326	82.0394	66.5586	86.6868	62.8767	52.1565	58.9909	85.898	60.8002	41.5389	78.9762	101.27	44.2989	46.1534	PFDN5	12	53295291	53299450	+	3380	protein_coding	prefoldin subunit 5 [Source:HGNC Symbol;Acc:HGNC:8869]	-
ENSG00000115310	87.9559	52.4361	69.4663	89.3136	67.2815	66.8817	114.828	82.8313	71.5611	133.667	83.3048	44.77	69.5039	59.0512	69.7283	37.9222	51.1415	45.2998	RTN4	2	54972187	55112621	-	6644	protein_coding	reticulon 4 [Source:HGNC Symbol;Acc:HGNC:14085]	-
ENSG00000211896	2.35789	24.9927	8.45942	24.1009	16.8012	25.3603	289.818	11.3718	6.83816	35.8218	2.20338	684.546	90.676	7.37412	6.69544	15.1698	5.57587	37.8667	IGHG1	14	105736343	105743071	-	2762	IG_C_gene	immunoglobulin heavy constant gamma 1 (G1m marker) [Source:HGNC Symbol;Acc:HGNC:5525]	-
ENSG00000165119	68.5045	62.1807	74.7734	76.0294	62.3815	57.1263	78.9047	69.0292	58.7532	88.3433	83.7643	83.7401	84.0756	66.5623	93.4392	67.4722	67.2684	53.1709	HNRNPK	9	83968083	83980616	-	5114	protein_coding	heterogeneous nuclear ribonucleoprotein K [Source:HGNC Symbol;Acc:HGNC:5044]	-
ENSG00000143742	57.892	46.7082	76.4656	59.8451	34.2037	34.4241	88.2747	66.5715	56.7876	91.4923	109.984	84.1167	101.905	67.1326	95.5606	110.679	68.2625	44.7683	SRP9	1	225777813	225790466	+	1728	protein_coding	signal recognition particle 9 [Source:HGNC Symbol;Acc:HGNC:11304]	-
ENSG00000104805	85.0452	50.0446	86.8166	104.343	67.8876	108.593	97.0261	89.5663	71.4753	114.59	49.7364	47.9073	86.38	44.468	39.6708	19.3768	56.2823	74.776	NUCB1	19	48900050	48923372	+	3937	protein_coding	nucleobindin 1 [Source:HGNC Symbol;Acc:HGNC:8043]	-
ENSG00000213719	71.599	41.8476	70.4329	64.4316	31.7485	55.7385	107.703	80.2324	50.3458	82.4386	77.9849	123.564	93.5809	68.1023	99.34	64.2781	53.5355	56.3964	CLIC1	6	31730581	31739763	-	1942	protein_coding	chloride intracellular channel 1 [Source:HGNC Symbol;Acc:HGNC:2062]	-
ENSG00000138326	73.8727	77.0573	94.6006	78.9104	89.114	52.8285	74.3112	87.3616	66.6327	48.6322	59.6117	99.0292	62.9688	41.3746	71.608	123.439	45.1567	46.7877	RPS24	10	78033732	78056813	+	7857	protein_coding	ribosomal protein S24 [Source:HGNC Symbol;Acc:HGNC:10411]	-
ENSG00000198523	161.288	80.5704	104.78	86.8121	46.0259	86.7912	67.7424	44.1749	84.413	178.008	5.89696	19.3863	60.6323	5.9965	6.70532	189.344	7.93922	54.49	PLN	6	118548298	118560730	+	2001	protein_coding	phospholamban [Source:HGNC Symbol;Acc:HGNC:9080]	-
ENSG00000083845	57.8024	65.4756	77.1057	60.4831	60.3914	60.0811	77.4174	46.582	53.2221	76.0633	65.1052	118.694	76.5496	49.565	89.4314	152.964	61.5035	38.5485	RPS5	19	58386400	58394806	+	3617	protein_coding	ribosomal protein S5 [Source:HGNC Symbol;Acc:HGNC:10426]	-
ENSG00000227063	42.2728	47.4496	52.0291	38.5354	39.5609	65.1877	123.885	46.3934	33.1002	75.3013	101.515	107.382	115.821	44.2768	102.366	115.44	67.1754	66.9292	RPL41P1	20	21755270	21755350	+	81	processed_pseudogene	ribosomal protein L41 pseudogene 1 [Source:HGNC Symbol;Acc:HGNC:10356]	-
ENSG00000160213	188.894	67.5355	102.343	161.561	99.3798	100.43	76.2043	140.027	64.1379	60.3418	26.268	17.9315	20.5227	15.1902	35.5916	49.0446	10.9758	46.6407	CSTB	21	43772511	43776445	-	3935	protein_coding	cystatin B [Source:HGNC Symbol;Acc:HGNC:2482]	-
ENSG00000188229	94.9044	50.2359	59.6859	108.1	52.3981	67.8472	125.929	78.6714	76.0631	89.4929	51.9137	49.1572	76.12	81.0238	82.4365	21.0581	59.3297	56.7003	TUBB4B	9	137241213	137243707	+	2111	protein_coding	tubulin beta 4B class IVb [Source:HGNC Symbol;Acc:HGNC:20771]	-
ENSG00000065518	99.3403	69.9003	101.904	122.852	83.279	65.3387	74.8453	87.7686	84.056	60.1205	60.6707	36.0483	63.5225	42.5657	53.7105	94.6997	40.4295	38.8889	NDUFB4	3	120596309	120602500	+	1889	protein_coding	NADH:ubiquinone oxidoreductase subunit B4 [Source:HGNC Symbol;Acc:HGNC:7699]	-
ENSG00000178741	83.2697	30.9664	79.9845	111.907	33.8553	67.3006	145.175	86.8145	64.0141	96.8985	102.987	30.9539	66.533	66.9643	76.7139	27.3044	61.7693	43.8177	COX5A	15	74919791	74938168	-	1411	protein_coding	cytochrome c oxidase subunit 5A [Source:HGNC Symbol;Acc:HGNC:2267]	-
ENSG00000137970	37.9287	37.5731	97.4855	46.5998	31.6964	31.8085	118.198	63.1455	40.4381	89.5281	77.9242	137.049	98.7737	45.64	85.9064	125.175	61.2643	50.0678	RPL7P9	1	96678874	96679620	-	747	processed_pseudogene	ribosomal protein L7 pseudogene 9 [Source:HGNC Symbol;Acc:HGNC:37028]	-
ENSG00000085662	12.6757	8.77398	15.3246	20.5422	8.30131	15.4637	24.2007	29.5149	13.5277	14.0104	333.024	15.7586	17.8561	126.927	565.049	11.5874	22.5522	15.0618	AKR1B1	7	134442350	134459284	-	3660	protein_coding	aldo-keto reductase family 1 member B [Source:HGNC Symbol;Acc:HGNC:381]	-
ENSG00000125968	26.5725	25.5933	28.8014	51.1258	23.3419	24.0885	31.4626	35.7086	58.0341	27.667	178.854	27.5759	101.637	258.12	116.522	26.7292	178.371	49.7482	ID1	20	31605283	31606515	+	1233	protein_coding	inhibitor of DNA binding 1, HLH protein [Source:HGNC Symbol;Acc:HGNC:5360]	bHLH
ENSG00000210184	124.037	72.857	48.3202	142.612	103.596	102.08	48.4585	33.2723	54.5312	50.3176	94.4868	21.2857	105.289	62.2877	57.9178	4.33019	65.8742	77.4319	MT-TS2	MT	12207	12265	+	59	Mt_tRNA	mitochondrially encoded tRNA serine 2 (AGU/C) [Source:HGNC Symbol;Acc:HGNC:7498]	-
ENSG00000167460	117.112	122.398	121.906	57.9825	79.7726	66.274	60.3526	52.241	73.6956	87.3437	42.0806	37.9348	38.3987	53.2378	46.0897	131.878	24.1166	55.8041	TPM4	19	16067021	16103005	+	8632	protein_coding	tropomyosin 4 [Source:HGNC Symbol;Acc:HGNC:12013]	-
ENSG00000169715	86.3491	73.0207	28.3369	27.2842	46.2547	14.5871	36.1298	37.0007	82.4611	26.8859	47.4275	243.708	140.876	97.0553	35.7784	87.5241	60.774	92.933	MT1E	16	56625475	56627112	+	1052	protein_coding	metallothionein 1E [Source:HGNC Symbol;Acc:HGNC:7397]	-
ENSG00000245532	112.671	100.541	56.5016	70.1478	143.423	90.8416	10.1276	43.0554	187.767	27.0561	38.8735	18.7814	34.864	96.8966	25.8909	54.3168	50.5966	99.4109	NEAT1	11	65422774	65445540	+	22767	lincRNA	nuclear paraspeckle assembly transcript 1 [Source:HGNC Symbol;Acc:HGNC:30815]	-
ENSG00000181163	58.4749	70.0309	82.8774	67.7318	63.3719	34.8936	77.9097	74.5637	67.2537	73.9998	71.4073	92.4674	72.3136	46.1158	78.8965	127.113	53.1765	47.7694	NPM1	5	171387116	171411137	+	3828	protein_coding	nucleophosmin 1 [Source:HGNC Symbol;Acc:HGNC:7910]	-
ENSG00000108107	68.4949	73.6942	95.2389	78.7981	115.61	86.8943	80.2529	93.633	54.8367	38.1958	40.0367	93.9522	53.7516	36.3193	72.3884	81.0626	38.1833	58.62	RPL28	19	55385345	55403250	+	6933	protein_coding	ribosomal protein L28 [Source:HGNC Symbol;Acc:HGNC:10330]	-
ENSG00000240583	22.3797	26.1175	19.1431	12.6032	13.5785	27.0928	41.8776	22.3697	14.3964	11.8482	222.353	108.287	126.61	121.139	208.236	16.1544	208.062	34.0298	AQP1	7	30911694	30925516	+	3435	protein_coding	aquaporin 1 (Colton blood group) [Source:HGNC Symbol;Acc:HGNC:633]	-
ENSG00000131477	65.0337	55.9015	82.0587	131.22	73.8149	63.0273	129.602	227.721	68.2476	85.6203	28.0436	23.0945	36.6084	29.8907	30.2914	29.3759	20.6517	67.5987	RAMP2	17	42758447	42763041	+	1148	protein_coding	receptor activity modifying protein 2 [Source:HGNC Symbol;Acc:HGNC:9844]	-
ENSG00000130300	57.6727	41.2469	54.3398	94.6449	28.9112	53.8687	170.563	143.613	36.8339	98.3529	64.333	26.0312	50.2981	103.46	96.2095	15.4064	56.9076	52.9323	PLVAP	19	17351448	17377350	-	2305	protein_coding	plasmalemma vesicle associated protein [Source:HGNC Symbol;Acc:HGNC:13635]	-
ENSG00000104852	65.3474	122.347	57.6757	59.8157	109.726	81.1822	28.1376	71.9535	89.9939	34.0064	36.4586	47.5757	44.3339	65.6117	34.3741	66.2374	90.3293	136.677	SNRNP70	19	49085419	49108605	+	4684	protein_coding	small nuclear ribonucleoprotein U1 subunit 70 [Source:HGNC Symbol;Acc:HGNC:11150]	-
ENSG00000139644	51.8358	35.6272	48.5307	54.7805	32.4046	45.5861	80.8091	59.8685	46.1734	95.2407	117.807	79.7702	116.673	79.9788	102.275	50.0059	94.9105	47.3933	TMBIM6	12	49707725	49764934	+	6186	protein_coding	transmembrane BAX inhibitor motif containing 6 [Source:HGNC Symbol;Acc:HGNC:11723]	-
ENSG00000156976	72.4485	77.3948	69.4942	69.5597	69.6944	51.2669	56.8916	60.7882	81.8757	84.8776	57.4318	68.9772	76.4215	52.0449	72.5883	105.475	55.5848	51.2492	EIF4A2	3	186783205	186789900	+	6133	protein_coding	eukaryotic translation initiation factor 4A2 [Source:HGNC Symbol;Acc:HGNC:3284]	-
ENSG00000044574	64.6137	39.1319	75.8998	75.9645	29.3214	34.1793	91.2765	60.6228	46.7892	95.2332	91.3785	97.0969	117.109	67.7294	48.7477	49.7495	65.8495	76.3128	HSPA5	9	125234853	125241330	-	3908	protein_coding	heat shock protein family A (Hsp70) member 5 [Source:HGNC Symbol;Acc:HGNC:5238]	-
ENSG00000105373	67.9688	83.5312	92.5519	73.5857	101.095	53.0918	66.1256	74.1709	53.1327	54.2903	48.5348	111.019	63.9936	39.7753	72.5792	68.8522	48.3366	48.2081	NOP53	19	47745522	47757058	+	5341	protein_coding	NOP53 ribosome biogenesis factor [Source:HGNC Symbol;Acc:HGNC:4333]	-
ENSG00000166598	65.1371	54.1797	62.0947	63.2599	45.4129	39.1692	70.0181	52.1453	58.4256	56.6902	90.8935	126.413	109.319	62.5533	61.951	69.8478	69.619	61.2893	HSP90B1	12	103930107	103953645	+	4695	protein_coding	heat shock protein 90 beta family member 1 [Source:HGNC Symbol;Acc:HGNC:12028]	-
ENSG00000139329	13.3252	39.139	101.226	4.3989	24.0285	3.5382	158.265	88.7929	18.7179	20.1875	41.6065	200.789	78.7296	16.8687	99.2682	216.106	19.462	73.7518	LUM	12	91102629	91111831	-	3008	protein_coding	lumican [Source:HGNC Symbol;Acc:HGNC:6724]	-
ENSG00000100243	109.909	46.8629	80.414	110.492	35.5075	156.664	100.397	71.91	90.9018	126.19	28.6063	29.3968	44.8165	30.5482	30.1951	20.009	23.9454	76.9241	CYB5R3	22	42617840	42649568	-	5973	protein_coding	cytochrome b5 reductase 3 [Source:HGNC Symbol;Acc:HGNC:2873]	-
ENSG00000167588	6.44307	9.40213	8.5409	100.755	6.21516	5.41615	492.065	233.204	27.7375	240.983	2.40952	3.72945	24.0466	0.732214	3.61373	1.47233	10.907	35.4856	GPD1	12	50103819	50111319	+	3991	protein_coding	glycerol-3-phosphate dehydrogenase 1 [Source:HGNC Symbol;Acc:HGNC:4455]	-
ENSG00000109971	35.0303	18.4702	41.6027	34.8585	17.0106	31.715	109.542	26.0369	27.7075	188.268	95.1443	121.017	137.862	63.0777	56.3355	86.8709	73.9504	48.64	HSPA8	11	123057489	123063230	-	4849	protein_coding	heat shock protein family A (Hsp70) member 8 [Source:HGNC Symbol;Acc:HGNC:5241]	-
ENSG00000130402	103.692	57.9107	84.9653	71.2832	39.8788	85.4256	57.5031	35.31	66.6249	99.9522	64.2141	78.7246	86.07	64.0408	63.594	18.6185	58.0867	72.2906	ACTN4	19	38647649	38731583	+	6098	protein_coding	actinin alpha 4 [Source:HGNC Symbol;Acc:HGNC:166]	-
ENSG00000115738	93.873	90.9595	51.3233	117.709	127.941	47.7433	72.5091	69.3909	61.5259	39.8524	56.6321	34.0886	52.3492	36.6865	26.8012	114.937	42.391	68.731	ID2	2	8678845	8684453	+	2205	protein_coding	inhibitor of DNA binding 2 [Source:HGNC Symbol;Acc:HGNC:5361]	bHLH
ENSG00000101856	45.8324	52.8113	74.2806	49.5747	47.9617	47.55	61.844	64.5343	56.7551	94.3965	92.4521	75.7203	89.979	63.3119	105.951	71.1459	72.6075	38.4397	PGRMC1	X	119236245	119244466	+	1919	protein_coding	progesterone receptor membrane component 1 [Source:HGNC Symbol;Acc:HGNC:16090]	-
ENSG00000189060	21.9405	23.2576	26.3873	22.4353	21.7214	19.3235	42.8819	27.7088	21.7072	36.1305	307.751	35.1032	54.8157	193.428	206.476	22.6489	96.066	24.3496	H1F0	22	37805093	37807436	+	2344	protein_coding	H1 histone family member 0 [Source:HGNC Symbol;Acc:HGNC:4714]	-
ENSG00000197043	85.8941	48.8101	97.0122	124.846	42.7538	56.5376	152.86	104.765	84.5785	169.957	15.8021	26.732	35.0989	12.6295	9.61153	44.7221	12.6491	77.6145	ANXA6	5	151100712	151157882	-	5427	protein_coding	annexin A6 [Source:HGNC Symbol;Acc:HGNC:544]	-
ENSG00000176485	89.526	40.4116	74.9041	124.911	83.8701	64.8693	212.563	164.069	72.2193	111.834	10.4064	15.2407	22.4788	6.93423	20.6428	33.0748	11.9117	42.8503	PLA2G16	11	63573195	63616883	-	3116	protein_coding	phospholipase A2 group XVI [Source:HGNC Symbol;Acc:HGNC:17825]	-
ENSG00000144746	92.4295	59.9356	76.2043	98.7704	51.2943	64.5762	109.03	75.5025	63.2894	103.288	40.5431	66.4685	51.3239	35.5162	46.6855	93.6021	31.0718	39.6829	ARL6IP5	3	69084944	69106066	+	2522	protein_coding	ADP ribosylation factor like GTPase 6 interacting protein 5 [Source:HGNC Symbol;Acc:HGNC:16937]	-
ENSG00000100906	51.6912	53.0221	47.5854	74.7187	59.3414	59.5219	76.9435	84.6395	60.6098	74.5169	40.1327	101.847	85.2656	67.488	61.4758	55.3596	70.3654	70.6674	NFKBIA	14	35401511	35404749	-	2373	protein_coding	NFKB inhibitor alpha [Source:HGNC Symbol;Acc:HGNC:7797]	-
ENSG00000184897	66.5154	63.0547	59.4261	64.5239	62.5309	76.919	61.6398	60.5537	51.8709	37.1786	124.355	84.6312	59.3923	109.825	79.6966	26.6161	61.8964	42.6028	H1FX	3	129314771	129316277	-	1507	protein_coding	H1 histone family member X [Source:HGNC Symbol;Acc:HGNC:4722]	-
ENSG00000127920	95.3793	51.8128	89.3021	128.449	69.442	75.6437	126.525	116.288	78.1274	78.5184	31.2343	24.8629	32.659	18.9571	43.7054	71.2002	19.7509	41.2534	GNG11	7	93921699	93928610	+	3055	protein_coding	G protein subunit gamma 11 [Source:HGNC Symbol;Acc:HGNC:4403]	-
ENSG00000221983	74.2335	58.2639	79.9526	74.9629	60.499	59.8177	84.5584	64.4629	52.7036	68.7561	47.2652	97.0339	62.2842	40.1843	69.3798	112.291	42.5123	43.5983	UBA52	19	18571730	18577550	+	4306	protein_coding	ubiquitin A-52 residue ribosomal protein fusion product 1 [Source:HGNC Symbol;Acc:HGNC:12458]	-
ENSG00000178982	77.2172	49.9026	85.3442	108.647	59.5535	75.338	94.0675	80.1824	71.2282	89.2994	49.8099	39.8471	56.7504	41.5391	45.7981	69.2848	49.5372	43.9323	EIF3K	19	38619082	38636955	+	2798	protein_coding	eukaryotic translation initiation factor 3 subunit K [Source:HGNC Symbol;Acc:HGNC:24656]	-
ENSG00000132329	126.335	84.709	257.597	64.0617	85.8863	159.791	16.082	16.8626	129.204	90.4574	6.287	14.2857	25.0676	6.92497	16.9408	61.7378	4.76374	18.3628	RAMP1	2	237858893	237912114	+	1234	protein_coding	receptor activity modifying protein 1 [Source:HGNC Symbol;Acc:HGNC:9843]	-
ENSG00000215030	62.4943	59.4769	87.8966	83.2195	79.4017	61.6179	78.1841	74.7834	62.7655	49.1394	43.8995	104.362	57.7073	38.0112	78.4598	71.1812	38.8047	53.9215	RPL13P12	17	17383377	17384012	-	636	processed_pseudogene	ribosomal protein L13 pseudogene 12 [Source:HGNC Symbol;Acc:HGNC:35701]	-
ENSG00000135821	57.4459	37.1222	73.3871	71.8377	84.8794	60.4981	126.96	65.3341	82.4376	220.253	32.0439	42.2594	48.1448	29.2074	50.7641	32.1558	24.2857	44.9767	GLUL	1	182381704	182392206	-	9032	protein_coding	glutamate-ammonia ligase [Source:HGNC Symbol;Acc:HGNC:4341]	-
ENSG00000054148	93.8782	63.0259	95.6166	128.85	74.9498	91.7669	73.5524	94.2912	56.5127	46.6774	50.8365	37.4241	47.2266	38.3164	39.4972	52.3324	50.7823	47.3853	PHPT1	9	136848724	136851027	+	1612	protein_coding	phosphohistidine phosphatase 1 [Source:HGNC Symbol;Acc:HGNC:30033]	-
ENSG00000106682	62.4893	47.1798	63.5879	61.5828	43.8133	53.9593	85.0296	62.2922	54.147	106.381	81.0032	72.0656	77.2936	69.5857	72.6933	58.5741	64.0354	45.8137	EIF4H	7	74174245	74197101	+	3191	protein_coding	eukaryotic translation initiation factor 4H [Source:HGNC Symbol;Acc:HGNC:12741]	-
ENSG00000101421	84.2706	57.2998	93.6039	82.4494	59.9542	58.0429	80.9904	71.1488	54.2956	74.8988	70.8694	59.6816	61.0006	47.2357	77.4849	48.8922	48.5232	47.7017	CHMP4B	20	33811304	33854366	+	1646	protein_coding	charged multivesicular body protein 4B [Source:HGNC Symbol;Acc:HGNC:16171]	-
ENSG00000183722	91.3234	73.9511	74.9848	126.405	62.7219	61.2628	107.17	101.877	91.6813	170.647	8.63162	19.2106	30.8747	9.46848	13.1576	60.1757	6.50389	67.3461	LHFPL6	13	39209116	39603528	-	4564	protein_coding	LHFPL tetraspan subfamily member 6 [Source:HGNC Symbol;Acc:HGNC:6586]	-
ENSG00000173457	95.4147	56.0715	74.5957	127.963	58.6601	141.128	95.9622	110.142	52.4884	58.0212	38.3718	44.4616	37.0371	45.3737	42.5398	36.6472	26.39	35.4437	PPP1R14B	11	64244480	64246941	-	1655	protein_coding	protein phosphatase 1 regulatory inhibitor subunit 14B [Source:HGNC Symbol;Acc:HGNC:9057]	-
ENSG00000101182	76.4235	38.0874	59.4968	78.9842	34.791	42.3359	169.044	86.7595	44.2597	118.379	54.1013	62.9656	55.7092	42.5563	56.8568	65.6659	39.2267	50.8885	PSMA7	20	62136735	62143440	-	1750	protein_coding	proteasome subunit alpha 7 [Source:HGNC Symbol;Acc:HGNC:9536]	-
ENSG00000116016	86.4203	32.2806	54.074	97.2582	15.5871	73.5772	132.971	58.9757	47.0475	128.689	41.0991	63.7056	93.1205	46.0474	48.3321	25.975	39.4473	91.0527	EPAS1	2	46293667	46386703	+	7302	protein_coding	endothelial PAS domain protein 1 [Source:HGNC Symbol;Acc:HGNC:3374]	Others
ENSG00000179632	84.1711	52.7414	91.3082	83.4139	66.3565	101.107	81.9553	62.1046	74.0682	96.986	47.5896	48.5678	54.8281	34.5534	57.9053	45.3782	43.6974	48.2282	MAF1	8	144104499	144107611	+	2377	protein_coding	MAF1 homolog, negative regulator of RNA polymerase III [Source:HGNC Symbol;Acc:HGNC:24966]	-
ENSG00000162734	69.7711	60.4477	80.6172	80.068	55.6828	51.9835	110.182	95.3449	55.5461	97.2009	40.2972	85.9151	63.9982	33.3259	45.4168	54.6471	29.2082	62.932	PEA15	1	160205337	160215376	+	2806	protein_coding	proliferation and apoptosis adaptor protein 15 [Source:HGNC Symbol;Acc:HGNC:8822]	-
ENSG00000198258	103.264	75.032	102.833	101.661	91.1786	60.3713	63.9564	79.789	52.453	44.0817	53.1441	45.0198	49.9622	37.1916	59.0483	83.5639	35.8014	33.1852	UBL5	19	9827892	9830115	+	1931	protein_coding	ubiquitin like 5 [Source:HGNC Symbol;Acc:HGNC:13736]	-
ENSG00000105655	130.271	80.9079	63.2214	152.924	91.2166	126.317	21.6455	42.7147	83.5468	41.8634	54.8871	17.9028	31.0379	58.4469	62.0348	24.7701	33.9809	51.9357	ISYNA1	19	18434388	18438301	-	3284	protein_coding	inositol-3-phosphate synthase 1 [Source:HGNC Symbol;Acc:HGNC:29821]	-
ENSG00000092010	64.6511	62.4404	78.7139	73.3422	55.2431	50.5396	64.3696	75.2978	50.6484	59.6141	63.7759	74.7972	59.9715	59.7401	104.483	73.1872	52.4012	46.0012	PSME1	14	24136158	24138967	+	1781	protein_coding	proteasome activator subunit 1 [Source:HGNC Symbol;Acc:HGNC:9568]	-
ENSG00000108551	13.328	9.86545	14.5367	36.2183	12.0855	8.49575	42.4618	152.797	17.0765	38.7226	75.4246	50.9836	54.6851	402.366	81.8467	11.6633	74.7355	70.74	RASD1	17	17494437	17496395	-	1748	protein_coding	ras related dexamethasone induced 1 [Source:HGNC Symbol;Acc:HGNC:15828]	-
ENSG00000163395	167.388	91.4299	27.8574	134.687	56.6231	234.245	6.72292	59.1568	192.653	10.3	0.0153371	0.0460679	5.11668	0.43122	0.0290331	16.6033	0.966352	162.951	IGFN1	1	201190825	201228952	+	12116	protein_coding	immunoglobulin-like and fibronectin type III domain containing 1 [Source:HGNC Symbol;Acc:HGNC:24607]	-
ENSG00000132507	110.571	60.991	81.5043	97.9872	78.7775	85.3754	74.3216	88.9432	62.6282	70.3331	46.0269	51.5363	49.8099	39.8884	56.4646	34.8688	36.674	39.7071	EIF5A	17	7306999	7312463	+	2815	protein_coding	eukaryotic translation initiation factor 5A [Source:HGNC Symbol;Acc:HGNC:3300]	-
ENSG00000134294	124.963	97.8948	69.3075	59.5615	85.8481	51.8363	53.7841	59.4433	107.42	59.7083	17.5635	42.8778	38.9912	33.6401	40.9812	106.844	27.7865	87.3192	SLC38A2	12	46358189	46372867	-	6602	protein_coding	solute carrier family 38 member 2 [Source:HGNC Symbol;Acc:HGNC:13448]	-
ENSG00000119655	92.93	58.2609	106.66	80.7655	71.7104	71.0986	92.7669	105.361	59.6238	69.9993	38.2092	42.8246	48.9766	29.6199	40.2529	85.2781	34.6385	36.2066	NPC2	14	74476192	74494177	-	2749	protein_coding	NPC intracellular cholesterol transporter 2 [Source:HGNC Symbol;Acc:HGNC:14537]	-
ENSG00000185432	51.4684	46.1867	63.2509	85.5386	54.1964	50.1324	119.424	84.9762	69.0654	136.007	53.6924	37.787	62.9536	38.1173	54.4245	53.7367	56.0784	43.5626	METTL7A	12	50923472	50932517	+	4083	protein_coding	methyltransferase like 7A [Source:HGNC Symbol;Acc:HGNC:24550]	-
ENSG00000148180	97.9544	69.8717	94.5501	68.7242	50.7886	53.6443	84.2373	82.7111	90.782	115.342	38.0865	38.5175	49.5692	39.0526	59.4926	46.9224	22.0247	54.4226	GSN	9	121207794	121332843	+	11018	protein_coding	gelsolin [Source:HGNC Symbol;Acc:HGNC:4620]	-
ENSG00000187288	10.2138	11.6319	9.62139	125.354	7.76429	13.4078	336.621	245.551	37.3074	282.44	0.241205	0.990156	9.08368	0	1.95686	3.95293	0.403591	59.7113	CIDEC	3	9866711	9880254	-	1926	protein_coding	cell death inducing DFFA like effector c [Source:HGNC Symbol;Acc:HGNC:24229]	-
ENSG00000143774	94.6769	49.8221	100.749	108.095	60.6349	110.144	75.3871	79.5079	92.9707	76.1162	35.5819	35.4485	46.3372	30.8766	35.4052	51.1719	26.4863	46.2037	GUK1	1	228139962	228148984	+	4725	protein_coding	guanylate kinase 1 [Source:HGNC Symbol;Acc:HGNC:4693]	-
ENSG00000104823	73.2625	41.5312	64.1866	148.639	52.2935	100.161	105.257	105.787	73.2016	64.0416	57.6604	32.4103	36.8973	38.8027	53.8373	26.9254	31.5479	47.7774	ECH1	19	38815422	38832005	-	2467	protein_coding	enoyl-CoA hydratase 1 [Source:HGNC Symbol;Acc:HGNC:3149]	-
ENSG00000070756	53.9854	53.7107	68.6273	81.6784	46.7788	35.9736	117.593	84.8868	55.631	72.7872	42.2816	105.956	61.5074	32.8256	70.6407	61.4187	39.9638	64.4382	PABPC1	8	100685816	100722809	-	4752	protein_coding	poly(A) binding protein cytoplasmic 1 [Source:HGNC Symbol;Acc:HGNC:8554]	-
ENSG00000196230	63.7812	61.0951	72.0869	83.936	60.0127	45.1692	98.4677	91.5201	60.0239	92.0936	42.3346	70.6491	49.0651	52.502	70.015	51.1875	39.3546	47.3486	TUBB	6	30720201	30725426	+	3359	protein_coding	tubulin beta class I [Source:HGNC Symbol;Acc:HGNC:20778]	-
ENSG00000163041	54.6546	54.3649	74.2095	63.5205	42.5726	19.7473	75.8572	64.1103	52.4217	69.899	83.8305	75.8464	65.9673	61.0952	90.5211	97.0438	59.9325	44.9394	H3F3A	1	226061851	226072001	+	3146	protein_coding	H3 histone family member 3A [Source:HGNC Symbol;Acc:HGNC:4764]	-
ENSG00000158710	70.5406	51.161	38.7007	39.9168	24.5287	46.6092	90.6379	39.2861	26.7597	41.9532	76.3993	121.585	82.6061	96.9033	113.679	53.8904	64.4051	65.9586	TAGLN2	1	159918107	159925732	-	2487	protein_coding	transgelin 2 [Source:HGNC Symbol;Acc:HGNC:11554]	-
ENSG00000101608	69.1254	45.8648	71.8309	57.3377	24.4863	36.6624	79.2612	69.6212	49.7758	67.1843	73.6281	89.3426	66.1426	74.4996	96.2922	82.3995	39.1353	52.5974	MYL12A	18	3247481	3256236	+	3245	protein_coding	myosin light chain 12A [Source:HGNC Symbol;Acc:HGNC:16701]	-
ENSG00000130770	139.619	65.2313	83.8137	93.5953	91.159	99.8937	29.8818	58.7596	42.2552	32.3619	68.5252	40.1372	55.5538	44.1972	63.442	50.3384	57.3598	28.198	ATP5IF1	1	28236109	28246906	+	2225	protein_coding	ATP synthase inhibitory factor subunit 1 [Source:HGNC Symbol;Acc:HGNC:871]	-
ENSG00000125901	81.3772	61.6099	86.1173	106.57	86.511	101.098	65.5109	84.4051	62.2237	58.958	55.4834	30.3347	41.3402	36.2622	62.9602	43.5701	45.0043	34.2129	MRPS26	20	3045945	3048254	+	1127	protein_coding	mitochondrial ribosomal protein S26 [Source:HGNC Symbol;Acc:HGNC:14045]	-
ENSG00000197256	108.954	84.067	141.154	85.0641	99.1509	105.23	44.8816	66.5223	99.1057	120.745	12.3287	15.8576	25.4864	14.4285	12.4479	46.2461	13.847	47.212	KANK2	19	11164267	11197791	-	7638	protein_coding	KN motif and ankyrin repeat domains 2 [Source:HGNC Symbol;Acc:HGNC:29300]	-
ENSG00000077549	99.7342	62.7534	108.812	95.6856	76.66	63.5973	68.6118	78.3979	82.1025	81.899	33.6584	43.4535	43.2442	32.0111	37.3865	43.5848	28.1621	53.52	CAPZB	1	19338776	19485539	-	3238	protein_coding	capping actin protein of muscle Z-line subunit beta [Source:HGNC Symbol;Acc:HGNC:1491]	-
ENSG00000120215	147.475	50.5549	38.5967	189.283	73.0459	105.41	90.3176	160.604	71.2723	71.6775	0.256164	0.241392	10.5476	0.832972	0.358595	75.045	1.02428	46.6678	MLANA	9	5890802	5910606	+	3083	protein_coding	melan-A [Source:HGNC Symbol;Acc:HGNC:7124]	-
ENSG00000176978	103.399	67.6974	67.8218	93.2898	98.8392	86.014	80.2331	92.4451	76.3559	53.6325	31.9426	43.0494	38.1678	38.1534	39.2573	32.9589	35.7303	50.8473	DPP7	9	137110542	137115177	-	2820	protein_coding	dipeptidyl peptidase 7 [Source:HGNC Symbol;Acc:HGNC:14892]	-
ENSG00000152583	44.7787	79.2095	69.4622	20.9208	51.081	34.5958	144.075	89.4143	32.4377	41.4026	29.1937	50.3659	48.9313	47.091	24.0205	259.361	27.7772	32.918	SPARCL1	4	87473335	87531061	-	3477	protein_coding	SPARC like 1 [Source:HGNC Symbol;Acc:HGNC:11220]	-
ENSG00000173486	96.6587	68.1203	78.7417	96.0869	98.7547	77.3724	53.724	70.8071	51.4659	34.7091	61.9702	47.2363	57.1204	52.9228	51.1272	33.6193	56.8001	37.1615	FKBP2	11	64241003	64244132	+	1608	protein_coding	FK506 binding protein 2 [Source:HGNC Symbol;Acc:HGNC:3718]	-
ENSG00000122862	32.1938	28.1458	27.5335	27.5873	11.1387	8.7237	108.857	46.1573	21.0973	50.1278	97.7099	127.835	98.2518	90.7674	175.347	87.073	22.3797	62.6107	SRGN	10	69088106	69104811	+	1220	protein_coding	serglycin [Source:HGNC Symbol;Acc:HGNC:9361]	-
ENSG00000162496	49.3813	54.6023	86.7377	108.489	66.3388	98.5636	74.5248	84.3161	107.406	116.897	21.6213	24.8806	48.2928	17.8361	34.0477	37.8677	24.1471	66.8921	DHRS3	1	12567910	12617731	-	3036	protein_coding	dehydrogenase/reductase 3 [Source:HGNC Symbol;Acc:HGNC:17693]	-
ENSG00000084754	71.2731	28.5206	63.0783	115.719	37.5535	70.7815	126.86	77.4866	61.9174	121.47	45.0893	30.2521	50.5516	35.6436	38.116	41.4712	40.3947	65.8167	HADHA	2	26190635	26244726	-	4385	protein_coding	hydroxyacyl-CoA dehydrogenase trifunctional multienzyme complex subunit alpha [Source:HGNC Symbol;Acc:HGNC:4801]	-
ENSG00000213178	71.5605	105.213	78.9059	85.0681	124.472	48.2946	54.419	84.2682	52.8958	30.8064	36.2583	68.4084	41.1251	20.5185	57.7288	94.7149	31.9932	33.8736	RPL22P1	3	169483671	169484080	-	410	processed_pseudogene	ribosomal protein L22 pseudogene 1 [Source:HGNC Symbol;Acc:HGNC:17998]	-
ENSG00000173113	82.6328	76.2148	96.2628	83.1391	98.0137	55.6452	61.5796	82.9061	48.8009	41.8529	47.3137	58.7354	45.0934	36.5658	72.0539	64.1768	36.9823	32.0871	TRMT112	11	64316460	64318084	-	1625	protein_coding	tRNA methyltransferase subunit 11-2 [Source:HGNC Symbol;Acc:HGNC:26940]	-
ENSG00000152518	47.793	51.6659	40.6968	43.64	61.4125	45.5152	106.963	62.7343	46.3296	61.3667	61.3506	132.542	68.5506	88.9968	48.0088	39.9673	44.7835	65.8573	ZFP36L2	2	43222402	43226609	-	3696	protein_coding	ZFP36 ring finger protein like 2 [Source:HGNC Symbol;Acc:HGNC:1108]	Others
ENSG00000176907	8.72736	21.8215	21.9958	6.03895	21.7969	4.98401	15.7536	5.41514	4.33838	4.68732	215.091	50.5273	50.3619	215.27	263.675	69.9748	97.9506	35.7462	TCIM	8	40153455	40155308	+	1854	protein_coding	transcriptional and immune response regulator [Source:HGNC Symbol;Acc:HGNC:1357]	-
ENSG00000067113	59.979	57.6202	62.6215	67.452	16.7486	41.4971	153.747	61.318	68.5648	166.108	32.1689	31.1472	69.2366	44.9576	48.1584	50.3612	23.7369	52.9968	PLPP1	5	55424854	55535050	-	2016	protein_coding	phospholipid phosphatase 1 [Source:HGNC Symbol;Acc:HGNC:9228]	-
ENSG00000186468	49.8273	51.0645	72.7524	61.7385	40.1302	27.3179	72.4084	51.9784	54.45	65.5453	64.3025	104.279	68.364	41.1382	75.7847	119.828	45.3234	41.8596	RPS23	5	82273358	82278577	-	4204	protein_coding	ribosomal protein S23 [Source:HGNC Symbol;Acc:HGNC:10410]	-
ENSG00000175334	93.1377	73.167	89.5919	97.2257	84.4848	64.197	61.7851	83.5688	68.6352	53.2551	48.8282	42.9222	37.8403	38.4898	55.6593	40.908	31.9845	39.8064	BANF1	11	66002079	66004149	+	1645	protein_coding	barrier to autointegration factor 1 [Source:HGNC Symbol;Acc:HGNC:17397]	-
ENSG00000251562	93.9066	95.2601	37.0002	44.4687	75.815	84.4655	10.0068	56.1066	83.1386	14.9416	32.9912	25.1821	50.7523	101.763	29.0562	88.3491	84.9212	96.9477	MALAT1	11	65497688	65506516	+	8829	lincRNA	metastasis associated lung adenocarcinoma transcript 1 [Source:HGNC Symbol;Acc:HGNC:29665]	-
ENSG00000014641	88.3438	33.4338	70.8189	111.683	29.6707	65.4404	120.444	98.9007	71.4487	122.189	37.3603	17.9155	44.2321	22.3691	27.0798	58.3664	28.0102	53.9063	MDH1	2	63588609	63607197	+	4990	protein_coding	malate dehydrogenase 1 [Source:HGNC Symbol;Acc:HGNC:6970]	-
ENSG00000165272	0.432422	0.462856	0.210088	0.299026	0.42243	0.0559344	1.02618	0.266178	0.222164	0.384243	211.54	16.1614	51.0759	540.447	156.685	1.55887	109.763	7.72254	AQP3	9	33441154	33447633	-	2950	protein_coding	aquaporin 3 (Gill blood group) [Source:HGNC Symbol;Acc:HGNC:636]	-
ENSG00000100632	74.5681	65.0152	79.9772	76.1149	54.3757	50.1524	66.2173	81.1835	53.9355	62.5252	55.8372	53.6221	53.7441	42.4089	58.7666	92.7576	39.9476	37.3651	ERH	14	69380123	69398627	-	1446	protein_coding	ERH, mRNA splicing and mitosis factor [Source:HGNC Symbol;Acc:HGNC:3447]	-
ENSG00000241468	97.005	53.1943	97.1727	111.463	74.3137	105.169	79.8883	95.805	59.0828	57.9393	30.1198	24.3709	34.6337	25.846	34.3261	57.34	25.4122	32.4245	ATP5MF	7	99448475	99466331	-	2275	protein_coding	ATP synthase membrane subunit f [Source:HGNC Symbol;Acc:HGNC:848]	-
ENSG00000106803	73.2324	63.7453	95.047	87.0152	56.499	37.2998	83.7129	96.81	51.0689	57.3336	42.8254	48.7802	42.1878	35.8679	45.4804	96.5246	35.2323	40.7452	SEC61B	9	99222064	99230615	+	1190	protein_coding	Sec61 translocon beta subunit [Source:HGNC Symbol;Acc:HGNC:16993]	-
ENSG00000135916	35.8195	25.489	42.6307	39.1646	20.432	49.7357	53.0539	47.8603	27.0405	52.716	77.9842	163.785	78.3432	140.529	62.1272	26.4189	90.8754	54.8008	ITM2C	2	230864639	230879248	+	2611	protein_coding	integral membrane protein 2C [Source:HGNC Symbol;Acc:HGNC:6175]	-
ENSG00000170043	104.349	50.1826	94.5251	113.75	79.1556	91.8737	58.262	76.1086	70.9775	59.6928	39.434	34.4778	35.727	35.8449	49.2652	22.7773	27.6724	38.1812	TRAPPC1	17	7930345	7932123	-	1171	protein_coding	trafficking protein particle complex 1 [Source:HGNC Symbol;Acc:HGNC:19894]	-
ENSG00000133872	55.9343	37.1927	55.6539	50.0863	34.2553	50.9643	82.9835	55.7499	38.3985	64.1947	84.9259	91.3619	77.8891	57.6635	90.5884	59.8287	52.7255	41.0705	SARAF	8	30063012	30083208	-	2990	protein_coding	store-operated calcium entry associated regulatory factor [Source:HGNC Symbol;Acc:HGNC:28789]	-
ENSG00000123562	65.0094	81.9874	93.783	53.8388	71.8237	41.5008	55.6152	56.5747	70.9205	73.2196	45.8771	47.6549	55.7759	37.2707	46.9312	103.833	34.8222	44.9027	MORF4L2	X	103675496	103688158	-	2648	protein_coding	mortality factor 4 like 2 [Source:HGNC Symbol;Acc:HGNC:16849]	-
ENSG00000142507	86.4277	52.9811	100.711	86.6943	59.5053	60.9088	76.0369	77.8951	61.3497	72.951	48.7981	38.3862	45.615	35.715	55.7702	47.885	39.0201	34.495	PSMB6	17	4796144	4798503	+	1448	protein_coding	proteasome subunit beta 6 [Source:HGNC Symbol;Acc:HGNC:9543]	-
ENSG00000177666	12.9282	23.1604	20.2232	75.5543	17.1245	16.5951	330.757	110.614	33.9374	188.898	27.7068	22.5243	24.3294	32.2484	48.4477	5.39814	31.5791	56.9981	PNPLA2	11	818902	825573	+	3843	protein_coding	patatin like phospholipase domain containing 2 [Source:HGNC Symbol;Acc:HGNC:30802]	-
ENSG00000130303	22.6197	28.2006	25.5325	23.8921	10.9243	28.0172	77.5018	56.6389	12.0332	57.8842	60.3637	165.602	196.963	56.9781	67.3173	52.2378	70.3335	56.6671	BST2	19	17402939	17405648	-	1119	protein_coding	bone marrow stromal cell antigen 2 [Source:HGNC Symbol;Acc:HGNC:1119]	-
ENSG00000074071	69.3424	36.1421	77.9642	76.5157	34.999	69.9435	84.1664	44.7371	53.9863	75.2824	69.4934	51.3044	60.3258	48.0304	78.562	36.0049	52.4794	47.9753	MRPS34	16	1771890	1773155	-	1097	protein_coding	mitochondrial ribosomal protein S34 [Source:HGNC Symbol;Acc:HGNC:16618]	-
ENSG00000213442	42.9792	39.0778	63.3844	46.6509	40.5724	26.7198	79.9489	47.5895	41.4129	64.0977	49.0076	139.011	60.507	41.0902	86.7993	105.773	43.2455	48.1075	RPL18AP3	12	104265309	104265836	+	528	processed_pseudogene	ribosomal protein L18a pseudogene 3 [Source:HGNC Symbol;Acc:HGNC:31387]	-
ENSG00000115380	52.8708	44.6105	61.8507	138.914	54.0243	23.1559	102.258	153.13	64.5129	133.512	16.0755	31.8149	39.1817	7.10753	25.6081	61.3103	10.8029	44.9545	EFEMP1	2	55865967	55924139	-	3962	protein_coding	EGF containing fibulin extracellular matrix protein 1 [Source:HGNC Symbol;Acc:HGNC:3218]	-
ENSG00000178464	44.9676	45.7886	70.1432	53.7587	43.793	35.9433	69.8792	142.002	41.4754	53.4749	45.2316	89.7813	52.283	34.529	59.2119	104.886	38.1126	36.8312	RPL10P16	19	12643275	12643919	-	645	processed_pseudogene	ribosomal protein L10 pseudogene 16 [Source:HGNC Symbol;Acc:HGNC:36882]	-
ENSG00000152234	70.506	31.1087	57.4646	95.4884	32.3472	63.9876	93.8133	57.841	60.3779	124.219	63.0444	26.8044	65.5907	43.3716	38.1545	39.8773	54.1139	39.4081	ATP5F1A	18	46080248	46104334	-	10908	protein_coding	ATP synthase F1 subunit alpha [Source:HGNC Symbol;Acc:HGNC:823]	-
ENSG00000143819	91.6337	38.856	76.1602	144.18	47.8185	70.5619	101.972	93.4793	63.9753	95.0409	31.8227	22.8486	28.1304	26.8521	33.4013	13.8335	21.8891	51.2952	EPHX1	1	225810092	225845563	+	2508	protein_coding	epoxide hydrolase 1 [Source:HGNC Symbol;Acc:HGNC:3401]	-
ENSG00000172757	84.1215	52.4517	91.2144	76.7444	48.2484	60.4104	83.2148	70.6954	56.5623	80.3533	42.7874	53.6135	45.0951	38.3259	51.1607	37.5269	27.2617	53.8899	CFL1	11	65823022	65862026	-	5863	protein_coding	cofilin 1 [Source:HGNC Symbol;Acc:HGNC:1874]	-
ENSG00000185825	63.7755	32.3782	59.2744	100.065	40.8486	74.0497	129.986	101.443	65.6346	87.6955	39.4869	34.1509	36.2244	33.2859	51.4612	23.6607	34.5837	44.7926	BCAP31	X	153700492	153724746	-	3533	protein_coding	B cell receptor associated protein 31 [Source:HGNC Symbol;Acc:HGNC:16695]	-
ENSG00000126878	4.85267	6.0029	3.46195	3.35502	2.01575	3.89239	6.40049	2.64614	3.40684	8.59721	264.095	56.2652	121.561	148.873	227.192	7.29946	159.719	21.3696	AIF1L	9	131096476	131123152	+	5299	protein_coding	allograft inflammatory factor 1 like [Source:HGNC Symbol;Acc:HGNC:28904]	-
ENSG00000137312	79.8673	53.4284	77.5574	70.4542	65.1339	59.5597	65.3855	61.0872	58.3649	59.517	51.9823	49.1557	47.0538	58.8133	75.0313	33.9679	36.1393	46.115	FLOT1	6	30727709	30742733	-	3186	protein_coding	flotillin 1 [Source:HGNC Symbol;Acc:HGNC:3757]	-
ENSG00000175416	98.1898	53.1259	85.3194	98.0399	60.0981	103.746	62.9882	60.2412	60.3694	62.4746	39.3931	34.2861	41.6889	31.3998	53.7519	32.0761	27.186	41.2859	CLTB	5	176392455	176416569	-	2039	protein_coding	clathrin light chain B [Source:HGNC Symbol;Acc:HGNC:2091]	-
ENSG00000163430	64.4542	61.3844	70.0859	100.062	33.0808	65.146	83.3157	63.1957	95.3273	182.923	9.62976	27.2033	33.2885	9.15774	14.9542	65.4877	10.8053	52.3628	FSTL1	3	120392293	120451253	-	8727	protein_coding	follistatin like 1 [Source:HGNC Symbol;Acc:HGNC:3972]	-
ENSG00000131100	74.5596	34.2758	69.5589	85.6649	35.2501	74.3864	76.1834	66.4425	63.1604	101.03	49.016	32.4521	55.297	34.3104	56.432	50.5235	33.4116	47.695	ATP6V1E1	22	17592136	17628818	-	3212	protein_coding	ATPase H+ transporting V1 subunit E1 [Source:HGNC Symbol;Acc:HGNC:857]	-
ENSG00000179271	98.1091	67.5135	78.5306	93.7492	96.3714	86.8089	54.6127	70.5973	62.8904	43.1029	39.5215	32.7054	35.109	27.9028	46.7554	48.9457	29.6891	26.1154	GADD45GIP1	19	12953119	12957236	-	1782	protein_coding	GADD45G interacting protein 1 [Source:HGNC Symbol;Acc:HGNC:29996]	-
ENSG00000009307	55.2521	34.922	62.4478	46.8344	32.8853	38.1531	78.3072	43.9828	44.3296	98.799	72.3212	71.4925	75.2366	45.6638	72.2386	70.7989	53.4001	41.3889	CSDE1	1	114716913	114758676	-	5778	protein_coding	cold shock domain containing E1 [Source:HGNC Symbol;Acc:HGNC:29905]	CSD
ENSG00000160789	129.77	73.6379	81.345	84.8465	73.0702	88.2318	62.1835	49.0214	59.1625	72.7704	27.8404	29.8523	39.9931	40.1438	31.583	27.2781	21.5195	45.844	LMNA	1	156082573	156140089	+	6985	protein_coding	lamin A/C [Source:HGNC Symbol;Acc:HGNC:6636]	-
ENSG00000125743	71.3562	56.6726	82.8658	64.058	61.7032	62.0313	60.9755	63.6217	54.5783	50.9559	48.2761	60.8895	46.5951	33.4003	68.3467	85.6688	34.7447	31.2899	SNRPD2	19	45687454	45692569	-	1608	protein_coding	small nuclear ribonucleoprotein D2 polypeptide [Source:HGNC Symbol;Acc:HGNC:11159]	-
ENSG00000124107	0.788547	0.763661	0	0.341556	0.398264	0	0.18812	1.12928	0.69977	0	241.166	75.1547	15.9534	170.644	509.436	1.8861	10.5153	6.541	SLPI	20	45252239	45254564	-	596	protein_coding	secretory leukocyte peptidase inhibitor [Source:HGNC Symbol;Acc:HGNC:11092]	-
ENSG00000160932	63.299	32.6989	75.3101	110.626	48.6644	91.1598	59.8396	174.148	48.9959	69.843	15.327	52.3978	47.8053	21.9204	27.4484	29.2642	26.573	39.8473	LY6E	8	143017982	143023832	+	2640	protein_coding	lymphocyte antigen 6 family member E [Source:HGNC Symbol;Acc:HGNC:6727]	-
ENSG00000147872	41.1072	28.3382	72.8942	91.8843	27.9672	32.5568	175.994	128.221	42.5708	194.555	6.52174	9.94098	24.9016	6.49439	9.22838	55.376	6.03696	80.3871	PLIN2	9	19108375	19149290	-	5086	protein_coding	perilipin 2 [Source:HGNC Symbol;Acc:HGNC:248]	-
ENSG00000122566	51.3813	67.7395	46.5404	50.5313	60.6221	41.5231	52.9262	56.826	57.0923	57.9611	62.0366	53.6606	59.3731	66.8523	56.9221	69.7548	64.9808	56.2528	HNRNPA2B1	7	26173057	26201529	-	9267	protein_coding	heterogeneous nuclear ribonucleoprotein A2/B1 [Source:HGNC Symbol;Acc:HGNC:5033]	-
ENSG00000100201	32.8072	66.5446	40.2425	39.1113	57.2278	37.4257	28.0327	42.4178	82.733	33.2935	49.6631	51.7811	51.1292	121.184	50.7751	76.7798	103.585	67.4584	DDX17	22	38483440	38507660	-	9995	protein_coding	DEAD-box helicase 17 [Source:HGNC Symbol;Acc:HGNC:2740]	-
ENSG00000169020	106.208	72.6828	82.2829	93.2657	101.701	83.4687	49.7978	84.549	37.2061	37.5542	38.9934	27.1657	39.584	24.1638	32.6105	66.2076	25.9967	28.1237	ATP5ME	4	672436	674338	-	940	protein_coding	ATP synthase membrane subunit e [Source:HGNC Symbol;Acc:HGNC:846]	-
ENSG00000166794	94.2969	55.0701	88.6018	104.074	55.584	51.4188	81.9629	85.7896	53.4073	55.474	32.0403	42.2537	41.3301	36.8394	33.6592	42.9144	34.1931	41.1187	PPIB	15	64155812	64163205	-	1911	protein_coding	peptidylprolyl isomerase B [Source:HGNC Symbol;Acc:HGNC:9255]	-
ENSG00000072506	66.0553	46.8068	74.8713	76.8627	40.5011	54.9035	88.3885	79.2772	55.8399	74.4544	50.9974	38.0032	46.6174	47.3742	57.283	43.9473	49.0615	37.4766	HSD17B10	X	53431258	53434373	-	1115	protein_coding	hydroxysteroid 17-beta dehydrogenase 10 [Source:HGNC Symbol;Acc:HGNC:4800]	-
ENSG00000214253	60.2943	34.9069	57.9708	62.2233	27.0094	63.7044	78.7648	57.3999	45.3409	84.0177	72.1556	50.426	62.7173	42.7474	69.7652	68.802	50.1791	38.9912	FIS1	7	101239458	101252316	-	1795	protein_coding	fission, mitochondrial 1 [Source:HGNC Symbol;Acc:HGNC:21689]	-
ENSG00000159176	65.3172	88.8061	140.788	61.8713	83.5599	53.6695	21.2221	32.648	131.027	103.173	13.3452	22.6706	36.0376	16.8645	16.754	82.4235	11.1591	41.3605	CSRP1	1	201483530	201509456	-	10318	protein_coding	cysteine and glycine rich protein 1 [Source:HGNC Symbol;Acc:HGNC:2469]	-
ENSG00000092820	49.0385	39.7821	73.492	30.8417	28.7296	49.2254	24.2557	15.0037	58.4394	65.2343	62.3306	106.708	111.963	71.5688	74.837	32.153	72.9169	54.8437	EZR	6	158765741	158819412	-	3342	protein_coding	ezrin [Source:HGNC Symbol;Acc:HGNC:12691]	-
ENSG00000155368	89.2156	30.1533	43.7215	86.7062	29.5879	50.0149	151.221	115.327	42.1029	98.0364	41.1235	33.6104	41.6357	32.012	38.1148	43.3778	23.352	30.4444	DBI	2	119366921	119372560	+	2509	protein_coding	diazepam binding inhibitor, acyl-CoA binding protein [Source:HGNC Symbol;Acc:HGNC:2690]	-
ENSG00000156482	52.3175	55.268	76.9658	57.7963	44.9297	30.6083	65.373	52.1878	38.0829	53.3738	47.2405	119.026	56.116	30.7749	58.1014	114.323	31.4029	34.291	RPL30	8	98024851	98046469	-	4027	protein_coding	ribosomal protein L30 [Source:HGNC Symbol;Acc:HGNC:10333]	-
ENSG00000145592	54.3915	83.3406	88.3535	62.471	88.2296	43.746	51.5492	73.1553	30.2031	32.1095	37.909	87.5781	43.3603	22.2877	50.8624	110.327	26.8921	30.4304	RPL37	5	40825262	40835335	-	8153	protein_coding	ribosomal protein L37 [Source:HGNC Symbol;Acc:HGNC:10347]	-
ENSG00000138449	78.8459	73.0422	57.5961	75.8325	107.979	61.6011	79.4418	60.971	45.7792	71.1549	26.1248	41.1636	28.1221	11.7287	28.0159	122.56	18.008	28.9513	SLC40A1	2	189560579	189583758	-	4330	protein_coding	solute carrier family 40 member 1 [Source:HGNC Symbol;Acc:HGNC:10909]	-
ENSG00000154723	65.2988	36.4866	67.3756	82.9682	30.2952	37.7988	99.2777	79.8349	55.5851	88.5614	61.9413	28.0491	59.572	34.5675	41.9137	66.6777	40.5446	39.7441	ATP5PF	21	25716503	25735673	-	2043	protein_coding	ATP synthase peripheral stalk subunit F6 [Source:HGNC Symbol;Acc:HGNC:847]	-
ENSG00000079257	132.582	40.0132	121.603	182.498	169.738	93.4195	14.425	22.5618	52.9648	34.4893	10.3167	16.9476	14.5827	6.32946	12.8304	62.5113	6.00817	18.9948	LXN	3	158645822	158672693	-	1504	protein_coding	latexin [Source:HGNC Symbol;Acc:HGNC:13347]	-
ENSG00000176101	86.3785	53.8629	80.5739	91.201	62.3009	108.307	61.6516	58.553	62.6023	61.3686	41.1939	32.516	37.1328	30.99	51.4841	33.4307	28.0487	29.8644	SSNA1	9	137188647	137190370	+	1183	protein_coding	SS nuclear autoantigen 1 [Source:HGNC Symbol;Acc:HGNC:11321]	-
ENSG00000130724	96.8456	55.6783	84.2453	102.82	81.138	68.0099	54.0323	66.8625	58.8528	46.295	39.0588	31.7225	42.1001	33.3376	42.9351	42.6722	31.4678	33.0459	CHMP2A	19	58551566	58555124	-	2129	protein_coding	charged multivesicular body protein 2A [Source:HGNC Symbol;Acc:HGNC:30216]	-
ENSG00000127022	55.7465	40.5138	49.9882	65.8643	43.4187	57.1502	71.3717	59.1011	44.6734	83.5064	55.7919	65.0215	79.9292	38.4537	52.6056	58.2095	47.2031	38.6972	CANX	5	179678628	179730925	+	6235	protein_coding	calnexin [Source:HGNC Symbol;Acc:HGNC:1473]	-
ENSG00000172809	55.3736	65.2844	75.2483	62.504	68.8106	46.7137	64.1416	66.1655	36.769	37.1735	35.9491	78.1091	45.8236	26.9777	61.1058	115.47	30.9333	34.3621	RPL38	17	74203582	74210655	+	3829	protein_coding	ribosomal protein L38 [Source:HGNC Symbol;Acc:HGNC:10349]	-
ENSG00000188846	54.8337	73.4884	80.9796	65.9443	91.0483	42.5811	52.8038	64.6964	46.9681	43.8774	43.6878	60.4143	52.4023	24.9615	43.3954	95.0664	35.8369	30.6402	RPL14	3	40457292	40468587	+	8626	protein_coding	ribosomal protein L14 [Source:HGNC Symbol;Acc:HGNC:10305]	-
ENSG00000169567	55.0361	30.1443	72.8601	61.0913	27.0347	32.7285	79.1382	45.3973	35.2066	65.2408	64.7409	82.9838	67.0881	43.5449	79.1161	80.1281	46.5496	35.0817	HINT1	5	131159027	131171735	-	1936	protein_coding	histidine triad nucleotide binding protein 1 [Source:HGNC Symbol;Acc:HGNC:4912]	-
ENSG00000147123	68.4175	41.6553	67.0895	76.613	34.6925	65.5138	67.2481	63.8797	61.4712	64.8257	60.7401	36.8366	51.1845	45.9629	64.2151	52.3214	45.4302	34.6234	NDUFB11	X	47142216	47145504	-	1418	protein_coding	NADH:ubiquinone oxidoreductase subunit B11 [Source:HGNC Symbol;Acc:HGNC:20372]	-
ENSG00000283041	29.1754	34.407	52.4012	34.4443	32.3352	21.2223	69.5415	42.9834	32.6921	85.402	68.1638	99.7166	84.4695	49.2975	86.6602	78.0053	60.3765	41.3968	AC008038.1	7	133034607	133035920	-	1314	processed_pseudogene	eukaryotic translation elongation factor 1 gamma (	-
ENSG00000189129	226.811	64.6823	48.6811	127.941	25.6029	179.711	63.0221	80.5128	23.4958	33.8662	8.61684	12.5286	21.0613	6.85576	11.9957	33.913	5.40673	25.1512	PLAC9	10	80131682	80145359	+	1240	protein_coding	placenta specific 9 [Source:HGNC Symbol;Acc:HGNC:19255]	-
ENSG00000197747	15.1857	25.2037	11.8891	17.4147	23.8058	14.8645	50.7191	24.8995	16.2176	16.2316	156.891	110.239	78.6294	122.127	167.79	23.1804	75.9747	41.1746	S100A10	1	151982915	151994390	-	1543	protein_coding	S100 calcium binding protein A10 [Source:HGNC Symbol;Acc:HGNC:10487]	-
ENSG00000164692	75.8174	123.128	174.556	21.6049	74.3097	28.2948	119.476	79.2395	26.9116	46.7388	6.66275	28.3891	24.1314	10.069	9.03603	80.8901	12.176	45.5046	COL1A2	7	94394561	94431232	+	11156	protein_coding	collagen type I alpha 2 chain [Source:HGNC Symbol;Acc:HGNC:2198]	-
ENSG00000283498	76.6176	100.548	61.9759	71.0491	89.3611	66.0026	37.5931	63.346	30.8416	15.2406	54.6541	64.5713	35.7957	46.8813	50.2522	67.9279	19.4329	34.398	MIR1244-2	5	118974586	118974670	+	85	miRNA	microRNA 1244-2 [Source:HGNC Symbol;Acc:HGNC:38321]	-
ENSG00000163346	78.7155	43.7033	74.7219	80.0139	52.3301	47.818	52.799	49.9997	63.8041	105.852	37.9634	50.2454	60.8205	31.3076	35.4936	33.0779	39.928	46.4717	PBXIP1	1	154944076	154956123	-	3851	protein_coding	PBX homeobox interacting protein 1 [Source:HGNC Symbol;Acc:HGNC:21199]	-
ENSG00000132475	35.1567	42.3846	48.6997	30.4544	29.2547	22.7442	51.2892	41.6405	33.0344	38.1025	109.271	60.041	55.5965	162.093	74.6983	63.5829	48.8119	37.9639	H3F3B	17	75776434	75785893	-	6134	protein_coding	H3 histone family member 3B [Source:HGNC Symbol;Acc:HGNC:4765]	-
ENSG00000171314	27.0857	16.7389	51.8396	48.1174	8.80415	38.1674	121.31	31.9096	42.6204	163.213	74.2428	44.5208	61.4629	47.5527	63.6567	46.0821	50.02	47.0843	PGAM1	10	97426160	97433441	+	2568	protein_coding	phosphoglycerate mutase 1 [Source:HGNC Symbol;Acc:HGNC:8888]	-
ENSG00000175550	92.5337	64.8372	86.0241	91.9199	85.7153	60.1319	64.1606	83.4049	50.1134	48.3835	31.3451	37.5694	28.4645	28.9571	40.2133	34.0936	23.6338	32.7184	DRAP1	11	65919257	65921561	+	1737	protein_coding	DR1 associated protein 1 [Source:HGNC Symbol;Acc:HGNC:3019]	-
ENSG00000102024	70.5133	58.1588	56.1397	51.1195	39.8118	45.6092	52.7091	40.3792	54.6529	94.7725	66.9356	38.7856	61.9501	39.7724	43.4481	98.7145	39.4916	30.1668	PLS3	X	115561174	115650861	+	4099	protein_coding	plastin 3 [Source:HGNC Symbol;Acc:HGNC:9091]	-
ENSG00000122705	57.8224	46.7106	80.2113	74.4931	49.0776	55.1115	73.1564	62.2427	47.0247	62.9267	49.8548	46.5872	50.7358	34.9109	67.7156	52.3355	34.7319	35.3369	CLTA	9	36190856	36304781	+	2515	protein_coding	clathrin light chain A [Source:HGNC Symbol;Acc:HGNC:2090]	-
ENSG00000112514	70.2527	47.3634	82.194	76.1751	48.4916	51.1467	66.5187	73.3982	44.59	59.7315	49.8486	41.1081	45.649	30.989	55.6364	47.6099	45.8372	42.2755	CUTA	6	33416442	33418317	-	1876	protein_coding	cutA divalent cation tolerance homolog [Source:HGNC Symbol;Acc:HGNC:21101]	-
ENSG00000198830	42.6276	56.094	60.9878	44.7865	48.4144	30.2851	59.4337	48.8	48.8232	55.1602	53.6771	78.2512	61.1903	48.265	58.1636	73.8848	56.6567	50.9592	HMGN2	1	26472450	26475972	+	2509	protein_coding	high mobility group nucleosomal binding domain 2 [Source:HGNC Symbol;Acc:HGNC:4986]	-
ENSG00000187244	21.714	19.021	10.7149	15.3214	11.0295	15.038	16.6534	13.4928	12.0969	12.7803	141.075	87.5941	118.551	102.502	190.455	3.92734	130.587	51.4764	BCAM	19	44809059	44821421	+	5009	protein_coding	basal cell adhesion molecule (Lutheran blood group) [Source:HGNC Symbol;Acc:HGNC:6722]	-
ENSG00000158716	77.2304	37.576	67.6101	89.0762	53.1555	58.7023	79.0274	66.4893	50.9864	61.2394	36.3765	54.801	53.4767	32.3086	40.3845	31.339	40.2202	33.5207	DUSP23	1	159780932	159782543	+	825	protein_coding	dual specificity phosphatase 23 [Source:HGNC Symbol;Acc:HGNC:21480]	-
ENSG00000137409	50.988	39.2631	59.1408	62.4943	34.4165	52.442	62.5517	55.4596	49.0595	75.5264	52.2816	51.8549	64.3008	47.3645	60.8138	42.4984	50.3073	50.7999	MTCH1	6	36968141	36986298	-	3126	protein_coding	mitochondrial carrier 1 [Source:HGNC Symbol;Acc:HGNC:17586]	-
ENSG00000176387	0.326406	0.491718	0.278127	0.304514	0.643568	0.0925615	0.44026	0.188776	0.178251	0.262416	122.811	39.3118	243.478	211.366	83.2149	2.75163	191.458	63.0544	HSD11B2	16	67430652	67437553	+	2674	protein_coding	hydroxysteroid 11-beta dehydrogenase 2 [Source:HGNC Symbol;Acc:HGNC:5209]	-
ENSG00000178057	90.944	51.0076	76.1585	103.847	74.7009	88.4011	50.3249	71.3884	71.942	49.0539	32.6185	20.7914	31.8764	26.3587	32.5999	34.0082	21.6165	30.932	NDUFAF3	3	49020459	49023495	+	2434	protein_coding	NADH:ubiquinone oxidoreductase complex assembly factor 3 [Source:HGNC Symbol;Acc:HGNC:29918]	-
ENSG00000167004	64.1464	40.3974	67.7203	59.694	29.1808	41.8548	62.393	60.5984	54.9433	51.8128	57.8947	62.003	62.566	48.1197	59.1412	39.2139	44.3886	49.0465	PDIA3	15	43746392	43773279	+	4240	protein_coding	protein disulfide isomerase family A member 3 [Source:HGNC Symbol;Acc:HGNC:4606]	-
ENSG00000004142	63.7521	35.1925	56.5117	84.7159	35.4761	88.3768	74.7464	60.7153	45.5351	80.3929	57.3417	26.9298	53.7052	42.8781	42.3862	24.7652	45.0319	36.0998	POLDIP2	17	28347177	28357522	-	2121	protein_coding	DNA polymerase delta interacting protein 2 [Source:HGNC Symbol;Acc:HGNC:23781]	-
ENSG00000105401	57.7118	55.8097	65.3182	69.998	55.3801	55.3186	57	62.8565	51.1557	46.8594	42.4994	43.5918	38.9585	54.3668	48.2527	39.5025	45.9622	63.9778	CDC37	19	10391134	10420121	-	3041	protein_coding	cell division cycle 37 [Source:HGNC Symbol;Acc:HGNC:1735]	-
ENSG00000105953	71.8943	30.799	56.8489	107.723	35.582	117.104	61.3753	52.7718	70.4559	106.369	37.3342	17.9893	42.9726	28.5037	26.8044	13.3772	29.513	44.9541	OGDH	7	44606572	44709066	+	5210	protein_coding	oxoglutarate dehydrogenase [Source:HGNC Symbol;Acc:HGNC:8124]	-
ENSG00000131730	115.334	34.509	65.1472	136.679	32.7722	90.3434	91.0562	47.7236	92.1798	128.57	7.79361	1.36003	23.3767	7.75167	2.68159	26.4632	7.67088	40.4084	CKMT2	5	81233285	81266397	+	2736	protein_coding	creatine kinase, mitochondrial 2 [Source:HGNC Symbol;Acc:HGNC:1996]	-
ENSG00000168209	53.5025	37.867	48.6953	85.9903	53.834	47.6658	72.0497	143.19	37.6648	93.5811	14.8533	57.2035	37.6387	32.3793	22.2936	34.5607	25.6839	50.1394	DDIT4	10	72273920	72276036	+	2058	protein_coding	DNA damage inducible transcript 4 [Source:HGNC Symbol;Acc:HGNC:24944]	-
ENSG00000100380	40.7659	34.2792	54.9967	47.059	34.9723	25.684	83.2854	57.3183	46.8512	78.6422	55.0258	56.9666	76.5337	41.6716	62.9273	63.9719	50.9487	35.8546	ST13	22	40824535	40857022	-	4147	protein_coding	ST13, Hsp70 interacting protein [Source:HGNC Symbol;Acc:HGNC:11343]	-
ENSG00000266472	75.3219	64.3158	72.9284	75.7538	73.2636	66.5154	45.6404	79.2267	48.4341	36.511	33.4902	36.9895	38.0098	31.1367	44.2807	61.6517	34.5789	29.5471	MRPS21	1	150293720	150308979	+	1641	protein_coding	mitochondrial ribosomal protein S21 [Source:HGNC Symbol;Acc:HGNC:14046]	-
ENSG00000172037	101.232	46.9691	61.1182	49.6489	37.7226	77.6239	61.5801	56.0467	57.593	75.5206	33.179	31.8309	46.3986	43.0062	46.9948	14.8041	38.7172	64.1429	LAMB2	3	49121114	49133118	-	6865	protein_coding	laminin subunit beta 2 [Source:HGNC Symbol;Acc:HGNC:6487]	-
ENSG00000159069	73.6631	38.7527	75.9071	90.0572	52.4985	102.393	75.9014	46.8086	64.4722	79.0567	30.2564	33.4403	32.4543	26.6995	28.0003	21.8243	27.7421	43.5308	FBXW5	9	136940435	136944696	-	3252	protein_coding	F-box and WD repeat domain containing 5 [Source:HGNC Symbol;Acc:HGNC:13613]	-
ENSG00000132963	66.1048	46.1091	66.7499	74.2233	37.1922	48.4157	87.7014	74.4692	41.5978	60.6674	45.4475	41.3016	48.3846	31.1302	48.9502	63.6913	29.4964	31.7362	POMP	13	28659104	28678925	+	1428	protein_coding	proteasome maturation protein [Source:HGNC Symbol;Acc:HGNC:20330]	-
ENSG00000131981	74.6177	56.2466	78.6269	46.0299	51.8649	43.9879	125.942	69.8462	39.8943	64.921	30.273	34.2106	52.255	26.5254	36.4994	62.7138	18.2411	30.0118	LGALS3	14	55124110	55145413	+	2397	protein_coding	galectin 3 [Source:HGNC Symbol;Acc:HGNC:6563]	-
ENSG00000168385	51.3872	52.1958	54.9282	59.6245	44.4457	43.4545	61.9257	64.8983	51.8684	81.7337	44.6111	53.0129	53.7142	34.6569	51.8801	66.2145	36.5453	35.3194	2022-09-02	2	241315100	241354027	+	7378	protein_coding	septin 2 [Source:HGNC Symbol;Acc:HGNC:7729]	-
ENSG00000131495	82.9764	49.8576	80.8019	93.5754	74.3761	74.02	57.0394	63.6639	39.0796	36.7102	42.5535	30.9463	42.2589	26.453	43.4979	43.8164	30.4945	22.0646	NDUFA2	5	140638740	140647785	-	1488	protein_coding	NADH:ubiquinone oxidoreductase subunit A2 [Source:HGNC Symbol;Acc:HGNC:7685]	-
ENSG00000101160	44.7375	30.7448	48.9299	48.1783	31.6507	32.3455	99.0812	62.1697	22.5108	62.929	59.016	110.623	58.1629	44.255	62.9509	22.8654	47.6764	44.4743	CTSZ	20	58995185	59007247	-	2038	protein_coding	cathepsin Z [Source:HGNC Symbol;Acc:HGNC:2547]	-
ENSG00000062716	79.7496	84.4269	48.3548	46.9183	55.5403	71.2538	33.477	40.7276	90.1718	31.2967	23.4094	41.3144	22.7762	65.0579	29.3332	92.2776	8.22582	68.4171	VMP1	17	59707192	59842255	+	6916	protein_coding	vacuole membrane protein 1 [Source:HGNC Symbol;Acc:HGNC:29559]	-
ENSG00000167552	94.2421	69.7739	117.412	42.1892	68.7951	45.5323	54.5358	38.4137	79.2954	90.1878	12.4118	38.0155	32.6299	22.6108	12.7357	61.9547	15.1385	36.3057	TUBA1A	12	49184796	49189324	-	3421	protein_coding	tubulin alpha 1a [Source:HGNC Symbol;Acc:HGNC:20766]	-
ENSG00000172354	39.6208	37.9506	56.748	48.2378	26.1709	45.3089	76.447	54.7723	34.7431	60.0227	61.4806	65.138	57.7084	58.0232	80.8749	30.4932	52.2892	46.01	GNB2	7	100673531	100679174	+	2857	protein_coding	G protein subunit beta 2 [Source:HGNC Symbol;Acc:HGNC:4398]	-
ENSG00000120306	37.7746	19.0895	36.5425	40.7536	16.118	27.3155	34.9931	37.5179	27.5412	41.8885	127.22	34.8604	76.9696	87.3957	169.259	27.089	66.2243	22.8135	CYSTM1	5	140174642	140282052	+	2371	protein_coding	cysteine rich transmembrane module containing 1 [Source:HGNC Symbol;Acc:HGNC:30239]	-
ENSG00000105568	93.2293	36.5498	82.3012	101.706	51.1707	124.282	46.2906	43.6061	57.866	69.9154	28.4033	22.7781	31.2467	26.9578	32.2852	19.1413	23.7848	39.4702	PPP2R1A	19	52190039	52229533	+	7437	protein_coding	protein phosphatase 2 scaffold subunit Aalpha [Source:HGNC Symbol;Acc:HGNC:9302]	-
ENSG00000185236	61.2951	44.9204	59.8431	62.6362	57.3233	75.589	51.7929	56.1557	59.3392	67.8318	42.3558	42.3138	44.1665	43.9541	46.2239	17.0252	39.8689	55.8822	RAB11B	19	8389981	8404434	+	2470	protein_coding	RAB11B, member RAS oncogene family [Source:HGNC Symbol;Acc:HGNC:9761]	-
ENSG00000212802	35.3709	32.4808	60.162	42.6995	27.7891	30.4524	70.0064	29.0926	33.1325	74.3391	49.4775	95.5222	61.3269	36.8613	56.7891	108.756	41.5516	42.4906	RPL15P3	6	12514110	12514724	+	615	processed_pseudogene	ribosomal protein L15 pseudogene 3 [Source:HGNC Symbol;Acc:HGNC:21538]	-
ENSG00000099622	43.0795	60.1408	48.3019	45.8837	61.5126	50.0616	31.2167	42.8143	56.4742	31.2267	56.9538	54.7304	46.1675	64.1554	45.3753	53.3589	80.9068	54.7912	CIRBP	19	1259384	1274880	+	6368	protein_coding	cold inducible RNA binding protein [Source:HGNC Symbol;Acc:HGNC:1982]	-
ENSG00000185650	43.4843	38.8693	45.7853	37.1103	50.0607	30.3311	68.6081	52.8702	31.6492	49.186	57.3228	63.2796	51.4477	98.1125	61.8803	30.7171	42.5283	73.804	ZFP36L1	14	68787660	68796253	-	5160	protein_coding	ZFP36 ring finger protein like 1 [Source:HGNC Symbol;Acc:HGNC:1107]	Others
ENSG00000198502	5.59493	128.555	66.1568	11.4709	1.69547	6.87527	10.4111	147.208	7.42391	109.368	3.09707	18.3838	136.989	13.8101	120.167	128.998	1.81219	7.58997	HLA-DRB5	6	32517343	32530287	-	1260	protein_coding	major histocompatibility complex, class II, DR beta 5 [Source:HGNC Symbol;Acc:HGNC:4953]	-
ENSG00000111348	63.466	55.9845	54.1331	64.886	47.3997	56.2843	75.9288	70.8166	23.8095	38.1075	28.8416	109.401	37.9968	26.4987	38.9204	58.3887	17.9814	53.2048	ARHGDIB	12	14942017	14961728	-	2102	protein_coding	Rho GDP dissociation inhibitor beta [Source:HGNC Symbol;Acc:HGNC:679]	-
ENSG00000124172	78.1544	39.1567	73.353	79.0549	40.9925	66.0541	67.9586	62.5542	46.6787	50.7969	46.8548	43.3645	41.1047	23.6413	39.9488	63.3768	25.599	28.781	ATP5F1E	20	59025467	59032382	-	5126	protein_coding	ATP synthase F1 subunit epsilon [Source:HGNC Symbol;Acc:HGNC:838]	-
ENSG00000148834	92.9863	50.1227	91.2962	88.1605	71.9045	66.0123	46.8436	60.7975	43.3024	43.6668	35.6593	26.241	34.9741	23.3036	36.6713	53.4229	24.5928	25.6116	GSTO1	10	104235356	104267459	+	1691	protein_coding	glutathione S-transferase omega 1 [Source:HGNC Symbol;Acc:HGNC:13312]	-
ENSG00000030582	50.6645	28.3639	47.6608	42.1333	29.2998	47.6411	87.6696	54.975	35.7159	73.9984	52.0484	63.2352	51.1757	49.9317	75.8153	16.7868	50.338	58.0826	GRN	17	44345086	44353102	+	3680	protein_coding	granulin precursor [Source:HGNC Symbol;Acc:HGNC:4601]	-
ENSG00000111275	84.9531	39.8483	63.0088	112.374	77.7604	76.8162	98.6814	93.3293	66.4457	62.5845	12.6607	13.5616	24.8727	9.35187	9.53344	18.6196	17.2387	33.6651	ALDH2	12	111766887	111817529	+	9720	protein_coding	aldehyde dehydrogenase 2 family member [Source:HGNC Symbol;Acc:HGNC:404]	-
ENSG00000126524	65.5886	39.768	59.65	56.3376	34.8442	46.0627	65.0255	45.984	54.5237	66.1624	56.2461	41.8135	50.3593	35.4061	69.3434	54.5774	33.5195	38.7565	SBDS	7	66987677	66995601	-	1732	protein_coding	SBDS, ribosome maturation factor [Source:HGNC Symbol;Acc:HGNC:19440]	-
ENSG00000137575	58.8627	40.6751	63.26	67.7849	42.1898	41.1307	89.3343	67.4976	44.2426	91.1667	38.8235	25.3496	34.0689	27.717	46.0347	78.4195	19.7766	36.8691	SDCBP	8	58552924	58582860	+	4778	protein_coding	syndecan binding protein [Source:HGNC Symbol;Acc:HGNC:10662]	-
ENSG00000124762	105.992	34.2724	58.1151	62.0047	33.523	100.924	96.3126	63.0755	34.5371	66.0643	29.808	19.5508	51.2302	46.0333	33.842	23.5378	9.60494	44.177	CDKN1A	6	36676460	36687339	+	3050	protein_coding	cyclin dependent kinase inhibitor 1A [Source:HGNC Symbol;Acc:HGNC:1784]	-
ENSG00000172115	58.4926	32.8708	63.0883	87.4499	34.75	60.2901	83.5677	65.6515	46.8141	79.8332	56.4831	17.3342	48.5261	37.0645	34.0051	41.8445	27.6647	31.8711	CYCS	7	25120091	25125361	-	4457	protein_coding	cytochrome c, somatic [Source:HGNC Symbol;Acc:HGNC:19986]	-
ENSG00000196419	47.4344	36.9749	65.7269	51.5523	40.6618	43.7357	59.7596	48.2408	46.9141	77.1733	49.0557	49.4981	50.2402	43.2399	55.6931	60.8555	42.2583	37.0888	XRCC6	22	41621119	41664048	+	3288	protein_coding	X-ray repair cross complementing 6 [Source:HGNC Symbol;Acc:HGNC:4055]	-
ENSG00000004059	65.3808	44.0032	69.1308	65.8974	48.7798	65.6586	48.5392	53.5995	53.53	50.4285	48.4672	38.011	42.5525	41.3187	55.4896	37.7964	35.7551	32.8494	ARF5	7	127588345	127591705	+	1871	protein_coding	ADP ribosylation factor 5 [Source:HGNC Symbol;Acc:HGNC:658]	-
ENSG00000116285	59.1678	40.7736	45.2012	56.2818	36.4752	35.1417	74.9161	60.6968	73.3725	124.794	11.0536	25.3456	56.2257	26.8136	10.8884	44.7122	30.7324	84.1812	ERRFI1	1	8004404	8026308	-	4186	protein_coding	ERBB receptor feedback inhibitor 1 [Source:HGNC Symbol;Acc:HGNC:18185]	-
ENSG00000100650	34.5534	60.9083	34.4066	38.7223	46.2369	33.6358	26.9782	44.4869	73.4606	34.4901	48.7454	45.0892	47.911	64.0885	39.5113	83.2591	74.4014	65.3591	SRSF5	14	69726900	69772005	+	5357	protein_coding	serine and arginine rich splicing factor 5 [Source:HGNC Symbol;Acc:HGNC:10787]	-
ENSG00000008018	69.4902	46.895	70.9316	66.0512	46.6629	43.4824	62.5952	58.5489	50.7332	54.9341	40.6696	40.3898	41.6407	33.3646	47.1114	54.1538	32.9265	34.9116	PSMB1	6	170535117	170553341	-	2256	protein_coding	proteasome subunit beta 1 [Source:HGNC Symbol;Acc:HGNC:9537]	-
ENSG00000088986	63.9604	48.9979	73.9016	62.0501	40.4774	29.9656	64.3825	61.3985	40.9024	50.308	40.7217	48.2277	50.5691	33.3611	50.966	66.7862	28.8667	35.864	DYNLL1	12	120469850	120498493	+	2957	protein_coding	dynein light chain LC8-type 1 [Source:HGNC Symbol;Acc:HGNC:15476]	-
ENSG00000171159	69.2802	45.5507	77.5631	93.2508	75.0515	82.5032	37.778	69.7551	53.5579	30.3337	37.0362	28.2941	23.7229	29.5978	65.1585	27.4542	20.228	25.1422	C9orf16	9	128160260	128163928	+	1662	protein_coding	chromosome 9 open reading frame 16 [Source:HGNC Symbol;Acc:HGNC:17823]	-
ENSG00000102409	39.4847	54.3413	68.5095	54.9796	51.2981	24.9125	39.6387	51.2306	53.6134	50.0751	59.6442	43.2559	51.4075	41.3761	55.2472	66.5636	48.692	34.3095	BEX4	X	103215092	103217246	+	1328	protein_coding	brain expressed X-linked 4 [Source:HGNC Symbol;Acc:HGNC:25475]	-
ENSG00000089063	51.3831	43.5599	50.5192	78.1755	41.3114	39.8049	83.9887	81.9529	42.2394	61.9559	48.9684	32.0302	44.6689	30.6208	44.9816	44.414	33.8053	34.1401	TMEM230	20	5068232	5113103	-	3051	protein_coding	transmembrane protein 230 [Source:HGNC Symbol;Acc:HGNC:15876]	-
ENSG00000204308	38.756	25.2427	47.6657	48.3862	24.9355	28.3648	46.4468	43.137	34.4939	51.1819	85.8135	50.1458	65.7559	57.3944	113.089	31.1001	62.563	32.3181	RNF5	6	32178354	32180793	+	1178	protein_coding	ring finger protein 5 [Source:HGNC Symbol;Acc:HGNC:10068]	-
ENSG00000102575	90.8299	47.678	120.066	73.7372	68.1033	88.7778	74.6504	71.7091	72.1129	63.2598	1.68699	8.39755	23.149	2.27527	2.56512	34.7293	10.3189	32.0112	ACP5	19	11574660	11579008	-	2919	protein_coding	acid phosphatase 5, tartrate resistant [Source:HGNC Symbol;Acc:HGNC:124]	-
ENSG00000215021	47.2311	34.1796	58.9254	54.0892	33.9331	53.4174	81.7455	59.7908	42.9151	79.4428	44.597	40.706	49.8939	34.656	51.9615	39.4621	40.9226	36.7575	PHB2	12	6965327	6970825	-	2499	protein_coding	prohibitin 2 [Source:HGNC Symbol;Acc:HGNC:30306]	-
ENSG00000185043	42.6461	35.9015	42.1453	59.7888	31.2026	47.8093	66.8376	60.6599	37.8449	48.7333	49.5489	66.0727	56.2399	47.2245	65.1367	32.5252	41.8494	50.485	CIB1	15	90229975	90234047	-	1472	protein_coding	calcium and integrin binding 1 [Source:HGNC Symbol;Acc:HGNC:16920]	-
ENSG00000110321	40.2835	36.5656	47.8407	40.6665	29.0982	26.9577	69.759	51.2597	39.5551	89.2383	54.0886	54.1606	60.0852	45.5455	56.7261	60.0698	42.0653	37.3009	EIF4G2	11	10797050	10809110	-	8655	protein_coding	eukaryotic translation initiation factor 4 gamma 2 [Source:HGNC Symbol;Acc:HGNC:3297]	-
ENSG00000188643	65.4419	41.2954	72.5785	73.321	36.7002	79.4475	64.1343	68.8483	38.6695	54.1991	27.4202	41.4544	37.3026	27.6177	51.3453	33.7637	28.6467	38.9973	S100A16	1	153606886	153613145	-	1701	protein_coding	S100 calcium binding protein A16 [Source:HGNC Symbol;Acc:HGNC:20441]	-
ENSG00000136930	70.5957	48.562	66.6579	70.324	61.4666	52.863	57.6597	61.235	49.4781	55.0342	35.3034	32.5098	42.318	26.7098	37.0916	52.2113	32.3791	28.7352	PSMB7	9	124353466	124415444	-	1787	protein_coding	proteasome subunit beta 7 [Source:HGNC Symbol;Acc:HGNC:9544]	-
ENSG00000100994	57.505	42.0938	93.227	50.9146	53.7043	110.773	44.1061	47.6005	90.3561	87.1185	27.423	24.4522	26.4944	23.415	26.4964	20.0547	19.459	35.0175	PYGB	20	25248069	25298014	+	4474	protein_coding	glycogen phosphorylase B [Source:HGNC Symbol;Acc:HGNC:9723]	-
ENSG00000183648	78.0274	55.0407	74.2725	103.688	75.7566	81.6282	43.5746	68.8764	52.2086	29.1233	25.8659	16.0319	28.627	19.0177	22.4725	57.5989	18.484	27.6437	NDUFB1	14	92116122	92121917	-	2263	protein_coding	NADH:ubiquinone oxidoreductase subunit B1 [Source:HGNC Symbol;Acc:HGNC:7695]	-
ENSG00000105438	59.5334	37.9453	58.7821	59.2948	42.7595	37.1649	51.6517	52.2255	45.3404	46.5195	52.441	52.8362	52.6875	44.4735	66.0579	26.7398	46.2081	44.5145	KDELR1	19	48382570	48391553	-	2251	protein_coding	KDEL endoplasmic reticulum protein retention receptor 1 [Source:HGNC Symbol;Acc:HGNC:6304]	-
ENSG00000126088	86.048	49.4931	71.7156	93.2435	64.545	59.7779	48.1752	64.8633	66.5465	66.5617	21.934	17.7384	28.6206	17.4945	23.1215	45.0518	18.9618	32.7607	UROD	1	45012147	45015575	+	2908	protein_coding	uroporphyrinogen decarboxylase [Source:HGNC Symbol;Acc:HGNC:12591]	-
ENSG00000166228	51.7063	36.1582	53.0673	65.7538	31.3619	36.5999	63.3886	64.0802	60.7986	60.4984	43.808	33.6025	52.745	37.2814	58.4719	49.3233	44.1875	33.0606	PCBD1	10	70882280	70888784	-	1614	protein_coding	pterin-4 alpha-carbinolamine dehydratase 1 [Source:HGNC Symbol;Acc:HGNC:8646]	-
ENSG00000170525	11.4973	8.97446	8.66689	19.8884	11.8993	19.2696	96.2938	34.6396	17.4629	131.658	106.087	8.80966	10.4818	147.3	137.491	7.27916	52.9446	41.7744	PFKFB3	10	6144934	6254644	+	6114	protein_coding	6-phosphofructo-2-kinase/fructose-2,6-biphosphatase 3 [Source:HGNC Symbol;Acc:HGNC:8874]	-
ENSG00000165916	82.567	51.6823	71.7515	74.3254	59.7846	64.3423	48.8183	48.5468	54.0831	54.9256	28.4941	28.9583	39.2974	26.9046	32.1473	43.4857	30.4386	31.6341	PSMC3	11	47418769	47426473	-	2276	protein_coding	proteasome 26S subunit, ATPase 3 [Source:HGNC Symbol;Acc:HGNC:9549]	-
ENSG00000162576	74.9059	49.6637	60.9321	86.0095	55.5895	77.5375	75.9949	95.513	51.1253	60.7875	5.98977	36.8946	28.1765	7.31019	7.61691	26.7613	15.2373	55.7501	MXRA8	1	1352689	1361777	-	3622	protein_coding	matrix remodeling associated 8 [Source:HGNC Symbol;Acc:HGNC:7542]	-
ENSG00000168734	81.5031	52.5163	77.9913	69.0792	62.2656	71.4631	32.8363	42.9421	59.2224	46.5811	33.7067	20.2191	29.2561	22.3513	49.1248	66.8181	23.824	29.6756	PKIG	20	44531785	44624247	+	2496	protein_coding	cAMP-dependent protein kinase inhibitor gamma [Source:HGNC Symbol;Acc:HGNC:9019]	-
ENSG00000171222	74.2365	47.3282	76.7557	85.6017	74.2362	63.2414	49.3192	56.4248	55.491	35.3988	36.0756	31.6224	34.076	28.5048	41.6922	21.3498	29.5485	28.5645	SCAND1	20	35953617	35959472	-	1996	protein_coding	SCAN domain containing 1 [Source:HGNC Symbol;Acc:HGNC:10566]	-
ENSG00000135047	36.0667	26.6322	46.3378	58.8792	26.8115	17.2957	101.505	75.6685	38.7046	75.6956	62.2031	34.2656	57.1727	34.9012	55.8594	39.0888	47.802	32.2587	CTSL	9	87725519	87731393	+	2366	protein_coding	cathepsin L [Source:HGNC Symbol;Acc:HGNC:2537]	-
ENSG00000024422	78.349	48.831	63.4767	69.6202	48.541	89.212	104.832	64.5515	52.0474	100.909	9.82883	19.9427	19.1312	14.0629	13.7832	8.6224	8.89167	52.2645	EHD2	19	47713343	47743134	+	3923	protein_coding	EH domain containing 2 [Source:HGNC Symbol;Acc:HGNC:3243]	-
ENSG00000189171	104.072	49.9779	82.0006	70.5199	36.5528	113.628	67.4185	89.9021	30.8926	44.2826	18.7627	16.309	15.6182	12.5477	38.6416	40.4896	11.729	22.4851	S100A13	1	153618787	153631360	-	2216	protein_coding	S100 calcium binding protein A13 [Source:HGNC Symbol;Acc:HGNC:10490]	-
ENSG00000183036	28.5918	43.2554	298.784	30.3695	76.6716	29.0178	1.21649	12.3738	104.023	129.33	4.15836	5.00458	36.795	8.24685	5.31601	37.9757	11.8161	2.80883	PCP4	21	39867317	39929397	+	1106	protein_coding	Purkinje cell protein 4 [Source:HGNC Symbol;Acc:HGNC:8742]	-
ENSG00000100075	59.5476	24.6101	37.9366	82.8774	31.6242	51.9975	111.638	93.3901	48.2101	86.528	31.0519	24.1443	40.5552	24.1663	34.5724	12.1158	29.4599	40.1922	SLC25A1	22	19175575	19178830	-	2096	protein_coding	solute carrier family 25 member 1 [Source:HGNC Symbol;Acc:HGNC:10979]	-
ENSG00000232112	63.0719	50.7489	61.0509	68.3325	61.9984	64.7567	42.574	74.9476	31.3856	29.9504	40.2156	43.5729	37.7324	28.8829	51.8405	62.7151	30.028	20.2687	TMA7	3	48440257	48444208	+	1139	protein_coding	translation machinery associated 7 homolog [Source:HGNC Symbol;Acc:HGNC:26932]	-
ENSG00000246705	90.7459	38.2901	60.2769	102.107	41.2348	79.4548	81.8179	75.9088	52.7276	67.0531	24.3631	14.8715	22.779	16.2542	30.337	21.0871	11.0019	33.1428	H2AFJ	12	14774383	14778002	+	3356	protein_coding	H2A histone family member J [Source:HGNC Symbol;Acc:HGNC:14456]	-
ENSG00000210154	30.6076	21.5672	11.8483	58.8749	29.6707	25.4789	21.4346	4.12409	14.0189	7.9378	38.9411	12.9963	265.671	17.5805	55.4252	14.2769	147.89	85.0992	MT-TD	MT	7518	7585	+	68	Mt_tRNA	mitochondrially encoded tRNA aspartic acid [Source:HGNC Symbol;Acc:HGNC:7478]	-
ENSG00000210191	122.931	69.8026	20.0767	75.5016	69.3709	91.7993	32.3726	11.0595	17.6224	30.4096	68.7025	10.4818	83.0297	43.6531	15.5711	5.75732	56.109	38.6069	MT-TL2	MT	12266	12336	+	71	Mt_tRNA	mitochondrially encoded tRNA leucine 2 (CUN) [Source:HGNC Symbol;Acc:HGNC:7491]	-
ENSG00000188290	102.931	82.3254	44.4585	69.1911	75.7956	91.8014	39.5628	60.9037	47.5364	29.1128	17.9092	14.2285	27.3851	39.2075	19.2379	36.4255	20.7278	40.9175	HES4	1	998962	1000172	-	1118	protein_coding	hes family bHLH transcription factor 4 [Source:HGNC Symbol;Acc:HGNC:24149]	bHLH
ENSG00000142227	103.548	79.8766	68.7795	69.2806	86.2532	82.6517	30.6362	38.4235	72.8046	32.2826	12.875	40.6537	23.1194	13.2007	19.0217	49.1345	9.35507	27.6612	EMP3	19	48321509	48330553	+	1667	protein_coding	epithelial membrane protein 3 [Source:HGNC Symbol;Acc:HGNC:3335]	-
ENSG00000182054	16.1287	14.6826	26.7153	22.9803	10.9446	11.9621	51.8962	22.742	14.1223	45.0768	158.04	25.455	113.148	97.947	65.7707	11.6392	126.29	24.0059	IDH2	15	90083045	90102504	-	2814	protein_coding	isocitrate dehydrogenase (NADP(+)) 2, mitochondrial [Source:HGNC Symbol;Acc:HGNC:5383]	-
ENSG00000104870	44.1481	38.7556	57.5947	60.7174	42.1348	52.0563	98.4573	94.2589	40.0629	55.8914	22.8662	42.6677	40.5424	22.4302	25.3007	34.6519	31.4219	54.4175	FCGRT	19	49506816	49526333	+	4173	protein_coding	Fc fragment of IgG receptor and transporter [Source:HGNC Symbol;Acc:HGNC:3621]	-
ENSG00000159189	35.1035	24.7743	35.6535	72.4812	41.0278	49.3783	153.314	141.038	24.7248	74.0314	8.49084	45.6073	38.5553	19.1368	19.348	20.3237	4.25777	50.5556	C1QC	1	22643630	22648110	+	1335	protein_coding	complement C1q C chain [Source:HGNC Symbol;Acc:HGNC:1245]	-
ENSG00000155876	50.1959	30.4574	56.1254	53.8491	22.183	31.7759	72.0416	52.5578	46.4945	81.2543	52.1863	44.1714	46.5539	37.7007	59.6765	47.0767	36.1691	36.9542	RRAGA	9	19049395	19050983	+	1589	protein_coding	Ras related GTP binding A [Source:HGNC Symbol;Acc:HGNC:16963]	-
ENSG00000189266	49.5752	48.4422	44.6476	64.1688	42.1304	39.3367	48.3337	57.1774	42.6432	58.0365	51.5212	43.6009	49.999	34.4623	48.4982	67.4418	36.5197	29.8319	PNRC2	1	23956839	23963462	+	2779	protein_coding	proline rich nuclear receptor coactivator 2 [Source:HGNC Symbol;Acc:HGNC:23158]	-
ENSG00000074803	0.0522931	0.0196944	0.0144815	0.116273	0.110927	0.012852	0.353676	0.275218	0.0232029	0.126124	280.607	23.1896	94.8923	107.955	35.6411	1.30934	305.626	4.64949	SLC12A1	15	48178438	48304078	+	12839	protein_coding	solute carrier family 12 member 1 [Source:HGNC Symbol;Acc:HGNC:10910]	-
ENSG00000159423	49.2487	18.26	33.1636	109.224	14.6222	137.99	100.722	77.2364	52.7163	78.1928	12.4672	10.9821	46.2911	10.5741	10.094	7.03629	24.1792	61.0617	ALDH4A1	1	18871430	18902781	-	3689	protein_coding	aldehyde dehydrogenase 4 family member A1 [Source:HGNC Symbol;Acc:HGNC:406]	-
ENSG00000104763	77.6828	29.301	56.0757	70.1283	29.4121	49.5298	89.886	47.2539	59.9136	114.486	24.7777	9.01348	28.1533	21.4128	30.799	56.1234	15.2337	43.4409	ASAH1	8	18055992	18084998	-	15378	protein_coding	N-acylsphingosine amidohydrolase 1 [Source:HGNC Symbol;Acc:HGNC:735]	-
ENSG00000140545	118.93	41.0961	81.03	72.719	29.892	83.2876	46.7288	56.5798	74.0812	97.0276	8.25567	17.4909	24.0406	10.0249	13.3624	15.7018	7.30474	51.4959	MFGE8	15	88898683	88913411	-	6837	protein_coding	milk fat globule-EGF factor 8 protein [Source:HGNC Symbol;Acc:HGNC:7036]	-
ENSG00000130985	59.2748	42.9585	49.7867	65.1783	49.7538	57.6125	47.5773	49.3696	59.2842	68.7605	43.1795	28.2967	41.2216	37.3364	36.1532	18.7255	47.835	46.6619	UBA1	X	47190861	47215128	+	6437	protein_coding	ubiquitin like modifier activating enzyme 1 [Source:HGNC Symbol;Acc:HGNC:12469]	-
ENSG00000213722	67.4566	56.9276	47.7883	70.984	56.3252	63.0964	68.8268	87.0264	42.5843	42.8754	26.8156	33.5562	32.0688	25.3658	31.6601	30.8631	25.0951	38.7127	DDAH2	6	31727038	31730617	-	2538	protein_coding	dimethylarginine dimethylaminohydrolase 2 [Source:HGNC Symbol;Acc:HGNC:2716]	-
ENSG00000135677	52.566	24.3682	45.2294	65.7826	27.8198	54.6958	93.0286	71.841	37.8683	98.6944	44.7557	25.9731	39.9052	24.9004	37.8411	31.4676	29.3318	41.7009	GNS	12	64713445	64759447	-	6284	protein_coding	glucosamine (N-acetyl)-6-sulfatase [Source:HGNC Symbol;Acc:HGNC:4422]	-
ENSG00000130707	69.7807	19.0679	35.4177	74.1075	32.2194	45.0116	51.7405	47.0032	47.5471	67.5155	22.3141	32.0407	150.615	9.90058	36.5441	14.0556	58.4739	33.5921	ASS1	9	130444929	130501274	+	3050	protein_coding	argininosuccinate synthase 1 [Source:HGNC Symbol;Acc:HGNC:758]	-
ENSG00000197879	73.3843	40.9387	59.7128	71.74	40.7103	92.5591	56.6131	46.1792	62.5719	85.4536	22.5002	25.4084	32.6247	25.0224	29.9368	17.757	22.4751	39.1284	MYO1C	17	1464186	1492812	-	8106	protein_coding	myosin IC [Source:HGNC Symbol;Acc:HGNC:7597]	-
ENSG00000142669	75.7101	56.7441	59.1651	68.7677	64.0927	63.6559	63.7186	66.7964	48.2715	35.5716	25.7251	47.4247	27.3287	26.8983	42.1488	14.1044	17.4635	40.6201	SH3BGRL3	1	26279176	26281522	+	1786	protein_coding	SH3 domain binding glutamate rich protein like 3 [Source:HGNC Symbol;Acc:HGNC:15568]	-
ENSG00000136872	4.35082	1.1438	0.724496	2.67285	21.0975	1.00639	0.740816	0.513127	1.12045	3.38814	37.6607	4.64541	480.156	1.71031	48.6176	11.0243	175.81	47.6469	ALDOB	9	101420578	101449664	-	3935	protein_coding	aldolase, fructose-bisphosphate B [Source:HGNC Symbol;Acc:HGNC:417]	-
ENSG00000125971	70.0594	40.0459	62.7065	65.3182	57.4116	48.4622	40.6092	55.7684	54.8334	39.4954	45.304	29.5907	34.3997	34.1615	72.8044	27.0851	31.0847	34.2698	DYNLRB1	20	34516409	34540958	+	2460	protein_coding	dynein light chain roadblock-type 1 [Source:HGNC Symbol;Acc:HGNC:15468]	-
ENSG00000119888	0.186572	0.521974	0.0492067	0.242439	2.02595	0	0.133529	0.0667974	0.0709572	0.171424	174.5	60.048	103.173	163.959	197.857	5.90274	113.712	19.4177	EPCAM	2	47345158	47387601	+	2519	protein_coding	epithelial cell adhesion molecule [Source:HGNC Symbol;Acc:HGNC:11529]	-
ENSG00000168899	52.3013	32.788	68.8621	48.6342	35.3585	61.0463	63.247	61.3608	37.1014	46.0024	35.7921	59.178	43.8068	30.491	45.2822	54.9019	25.5665	39.1956	VAMP5	2	85584408	85593412	+	819	protein_coding	vesicle associated membrane protein 5 [Source:HGNC Symbol;Acc:HGNC:12646]	-
ENSG00000130513	50.3141	12.9154	39.288	12.2901	27.5239	10.0016	43.5692	54.9857	10.049	10.3454	83.0955	21.0836	44.8001	246.142	95.2553	7.44286	24.8382	45.5024	GDF15	19	18374731	18389176	+	2087	protein_coding	growth differentiation factor 15 [Source:HGNC Symbol;Acc:HGNC:30142]	-
ENSG00000167863	74.9523	49.8357	59.137	80.0787	58.6802	54.8234	50.9587	62.0418	51.8355	38.1732	39.5545	22.4288	36.5498	26.5167	29.5976	49.3092	26.8849	27.0913	ATP5PD	17	75038863	75046985	-	3231	protein_coding	ATP synthase peripheral stalk subunit d [Source:HGNC Symbol;Acc:HGNC:845]	-
ENSG00000111229	66.5399	48.0971	57.1817	66.2184	53.2209	54.5476	48.9991	60.5931	52.352	38.5958	34.6462	41.3929	33.6115	31.2352	47.2952	50.2179	23.6407	29.2987	ARPC3	12	110434825	110450422	-	3025	protein_coding	actin related protein 2/3 complex subunit 3 [Source:HGNC Symbol;Acc:HGNC:706]	-
ENSG00000002586	83.4455	50.4786	99.6005	74.2381	66.4812	51.766	67.427	71.4569	53.7461	57.7462	7.43372	25.5198	17.9893	8.48217	11.2433	42.0774	7.80362	40.6625	CD99	X	2691133	2741309	+	4912	protein_coding	CD99 molecule (Xg blood group) [Source:HGNC Symbol;Acc:HGNC:7082]	-
ENSG00000100823	49.1262	46.1738	55.5023	61.2718	35.4286	29.5279	73.2107	58.883	46.3122	70.5193	33.3025	44.6389	34.6518	35.3087	35.2511	48.6579	35.7283	43.6339	APEX1	14	20455191	20457772	+	1886	protein_coding	apurinic/apyrimidinic endodeoxyribonuclease 1 [Source:HGNC Symbol;Acc:HGNC:587]	-
ENSG00000175220	97.7882	47.8195	76.4248	76.0587	53.5503	134.253	42.844	35.4819	58.6486	77.9404	10.4901	12.9355	17.9693	10.1783	11.0689	18.8968	9.70378	44.6676	ARHGAP1	11	46677080	46700615	-	6138	protein_coding	Rho GTPase activating protein 1 [Source:HGNC Symbol;Acc:HGNC:673]	-
ENSG00000011600	48.3372	35.294	36.1469	88.654	45.5365	56.6698	126.83	93.067	27.9181	33.386	8.91218	71.9493	29.0035	17.3788	15.7904	41.4065	5.73131	49.0931	TYROBP	19	35904401	35908295	-	907	protein_coding	TYRO protein tyrosine kinase binding protein [Source:HGNC Symbol;Acc:HGNC:12449]	-
ENSG00000145337	46.5682	39.9814	61.2928	48.4115	37.7151	28.1275	58.9019	54.1919	32.8765	63.773	53.4193	47.3334	45.4104	33.6712	46.7076	71.1067	33.9826	27.4803	PYURF	4	88520985	88523813	-	1361	protein_coding	PIGY upstream reading frame [Source:HGNC Symbol;Acc:HGNC:44317]	-
ENSG00000085063	67.0095	36.0952	53.8804	73.2998	50.616	59.452	39.1196	50.3857	49.2496	54.2428	47.8284	32.2512	42.3547	31.7563	45.0271	40.8898	27.4477	29.939	CD59	11	33703010	33736491	-	10358	protein_coding	CD59 molecule (CD59 blood group) [Source:HGNC Symbol;Acc:HGNC:1689]	-
ENSG00000108821	63.7613	138.766	171.145	14.0701	91.7709	16.5779	112.759	41.6358	31.1585	21.6975	3.69983	28.3276	15.9713	8.91939	4.55489	30.0156	5.15558	30.652	COL1A1	17	50183289	50201632	-	9819	protein_coding	collagen type I alpha 1 chain [Source:HGNC Symbol;Acc:HGNC:2197]	-
ENSG00000160014	69.8855	28.892	64.866	47.0754	30.941	55.5046	55.9069	44.4938	42.4228	71.6259	40.5271	48.771	55.1255	34.569	37.8639	27.3386	35.9034	38.8037	CALM3	19	46601074	46610793	+	3667	protein_coding	calmodulin 3 [Source:HGNC Symbol;Acc:HGNC:1449]	-
ENSG00000198832	58.0173	42.796	87.1396	63.8531	41.6153	61.8709	38.2058	33.5258	54.2898	47.1177	31.6169	39.5515	37.8301	23.9375	53.2954	53.9661	19.0396	40.2137	SELENOM	22	31104772	31120069	-	3187	protein_coding	selenoprotein M [Source:HGNC Symbol;Acc:HGNC:30397]	-
ENSG00000124145	25.0005	18.3473	20.4214	18.9051	24.4814	33.437	18.279	20.1555	17.8764	25.6148	90.903	98.2954	134.806	69.982	70.7723	17.7751	85.9718	35.0839	SDC4	20	45325288	45348424	-	2613	protein_coding	syndecan 4 [Source:HGNC Symbol;Acc:HGNC:10661]	-
ENSG00000138080	59.8281	74.0171	74.6905	70.1532	85.1739	58.3651	39.7858	70.2866	58.3009	62.7595	9.14331	35.2316	21.3963	8.46829	9.95395	25.2254	13.9806	48.5858	EMILIN1	2	27078567	27086408	+	3958	protein_coding	elastin microfibril interfacer 1 [Source:HGNC Symbol;Acc:HGNC:19880]	-
ENSG00000259781	38.7661	47.6748	53.2455	43.3815	41.6124	32.4393	60.1385	56.7822	40.2122	58.1548	44.9458	45.0732	42.0953	33.3104	49.4743	72.0567	33.7669	31.8709	HMGB1P6	15	71164770	71165415	-	646	processed_pseudogene	high mobility group box 1 pseudogene 6 [Source:HGNC Symbol;Acc:HGNC:4998]	-
ENSG00000077942	54.6514	51.0295	109.515	36.3823	75.2825	24.3602	88.8492	123.647	53.4956	35.1203	9.36135	19.3842	14.6876	5.36062	30.4341	38.5764	8.82283	45.3859	FBLN1	22	45502238	45601135	+	7285	protein_coding	fibulin 1 [Source:HGNC Symbol;Acc:HGNC:3600]	-
ENSG00000110492	42.6804	53.8414	80.6307	91.9886	70.5827	54.4761	70.5598	99.4303	31.7437	48.9628	7.82729	25.057	13.1915	9.43603	11.7392	57.332	8.91559	43.1884	MDK	11	46380756	46383837	+	2196	protein_coding	midkine [Source:HGNC Symbol;Acc:HGNC:6972]	-
ENSG00000182195	96.8923	50.9741	72.2528	80.631	49.2864	57.0533	44.0035	49.5082	60.7021	73.8715	19.9482	18.3897	28.6418	14.2353	17.9758	23.5316	25.7862	37.8005	LDOC1	X	141175745	141177125	-	1381	protein_coding	LDOC1, regulator of NFKB signaling [Source:HGNC Symbol;Acc:HGNC:6548]	-
ENSG00000169564	53.5962	26.9617	59.4614	50.9113	17.565	16.9249	79.1885	44.2932	37.2122	84.2041	52.3227	53.9021	53.391	46.3514	48.1273	21.4604	38.4771	36.0606	PCBP1	2	70087454	70089203	+	1750	protein_coding	poly(rC) binding protein 1 [Source:HGNC Symbol;Acc:HGNC:8647]	-
ENSG00000138061	37.756	43.861	75.5582	60.1834	52.7599	25.0226	45.9459	54.8938	57.1829	88.1996	21.0497	43.087	25.9076	16.6756	60.2375	62.1243	13.7087	33.0089	CYP1B1	2	38066973	38109902	-	6014	protein_coding	cytochrome P450 family 1 subfamily B member 1 [Source:HGNC Symbol;Acc:HGNC:2597]	-
ENSG00000150779	69.0969	39.2513	76.0082	82.6375	41.2234	39.2704	62.6947	64.9385	33.9292	50.4588	33.069	31.1551	36.75	19.4803	30.341	56.8807	22.7495	26.1728	TIMM8B	11	112084800	112086798	-	1166	protein_coding	translocase of inner mitochondrial membrane 8 homolog B [Source:HGNC Symbol;Acc:HGNC:11818]	-
ENSG00000260032	37.7886	29.1929	43.1243	32.549	17.9169	59.0456	48.0063	31.1481	28.4567	80.9605	64.1544	60.644	72.9339	33.305	49.518	46.4067	50.1109	28.6596	NORAD	20	36045622	36050960	-	5339	lincRNA	non-coding RNA activated by DNA damage [Source:HGNC Symbol;Acc:HGNC:44311]	-
ENSG00000008282	40.6331	43.1768	51.7866	46.7538	28.2951	40.6926	52.6011	41.5256	29.344	71.148	59.6108	39.6623	48.5359	34.1076	52.3132	68.0068	37.3549	27.3283	SYPL1	7	106090503	106112576	-	2804	protein_coding	synaptophysin like 1 [Source:HGNC Symbol;Acc:HGNC:11507]	-
ENSG00000253683	56.9983	47.4106	63.5898	53.3658	70.7769	52.8536	41.4609	62.8064	24.2045	26.1451	34.6	49.6625	43.2493	25.5975	55.7485	57.2171	28.5927	17.7663	AC027309.2	5	172656522	172656713	-	192	processed_pseudogene	coiled-coil domain containing 72 (CCDC72) pseudogene	-
ENSG00000035403	52.1618	65.3196	83.8523	71.1495	70.1442	44.703	33.6965	41.3023	70.4983	109.461	12.2417	14.0815	23.428	12.0219	10.5564	44.4995	10.1375	42.6002	VCL	10	73995193	74121363	+	9992	protein_coding	vinculin [Source:HGNC Symbol;Acc:HGNC:12665]	-
ENSG00000182326	65.83	50.4852	87.3628	52.7663	60.1128	41.3282	51.0889	43.7018	45.7963	74.1662	6.91592	68.0639	29.3301	9.01021	15.6465	52.82	7.4204	50.0068	C1S	12	6988259	7071032	+	6462	protein_coding	complement C1s [Source:HGNC Symbol;Acc:HGNC:1247]	-
ENSG00000116251	46.5328	58.2942	53.8748	49.102	74.8421	36.67	38.0397	55.4167	29.3194	31.2426	41.2865	52.5136	41.1848	26.2426	51.1323	66.5167	33.5572	24.8492	RPL22	1	6185020	6209389	-	4682	protein_coding	ribosomal protein L22 [Source:HGNC Symbol;Acc:HGNC:10315]	-
ENSG00000220842	31.137	38.8446	43.1137	30.7669	44.4753	40.3121	40.3909	30.3082	18.3799	39.449	47.8987	108.531	60.2386	29.0595	49.836	93.3061	35.5063	26.2317	RPL21P16	10	120354701	120355183	-	483	processed_pseudogene	ribosomal protein L21 pseudogene 16 [Source:HGNC Symbol;Acc:HGNC:31396]	-
ENSG00000090013	79.2631	35.0316	56.215	90.7155	44.7959	52.4621	65.9176	39.3842	56.0176	52.6987	31.0257	26.8229	36.3666	21.1815	34.7511	34.1549	24.3918	26.2911	BLVRB	19	40447765	40465840	-	1689	protein_coding	biliverdin reductase B [Source:HGNC Symbol;Acc:HGNC:1063]	-
ENSG00000159840	48.7443	75.4503	116.903	46.9651	69.8394	51.5112	36.8365	32.8117	64.5255	59.9607	16.5705	30.3765	23.2108	26.3092	28.4743	23.0094	9.85039	45.8685	ZYX	7	143381080	143391111	+	3482	protein_coding	zyxin [Source:HGNC Symbol;Acc:HGNC:13200]	-
ENSG00000144381	44.9018	27.0667	41.1567	53.1817	26.9937	35.1586	63.3628	43.126	46.4011	64.48	53.7117	38.2624	70.2273	39.145	41.35	38.5177	46.8884	32.9175	HSPD1	2	197486581	197516737	-	4245	protein_coding	heat shock protein family D (Hsp60) member 1 [Source:HGNC Symbol;Acc:HGNC:5261]	-
ENSG00000147065	55.9512	43.8381	44.0609	37.9338	34.2473	42.5297	53.7784	35.6853	31.3817	64.8429	40.4885	69.7581	51.7107	44.4844	45.8843	30.6868	39.1034	40.4795	MSN	X	65588377	65741931	+	5971	protein_coding	moesin [Source:HGNC Symbol;Acc:HGNC:7373]	-
ENSG00000183087	54.5072	52.5163	65.0922	43.2036	62.0585	80.5251	30.8021	29.3792	62.1696	40.9186	46.309	21.6845	39.8419	22.8756	74.0061	21.7878	24.8654	33.8237	GAS6	13	113820549	113864067	-	6006	protein_coding	growth arrest specific 6 [Source:HGNC Symbol;Acc:HGNC:4168]	-
ENSG00000185641	45.7194	50.7069	58.8189	41.4776	55.0459	42.6893	42.0824	48.8699	24.7586	24.8902	43.3423	81.3046	40.2762	21.9603	48.7702	80.1375	31.3896	24.006	AC034236.1	5	116051917	116052289	-	373	processed_pseudogene	ribosomal protein S25 (RPS25) pseudogene	-
ENSG00000145494	65.7047	35.7937	66.8451	65.1435	36.9708	56.7458	66.53	56.5901	31.9459	48.1738	48.6651	31.0622	37.3952	29.7213	35.6025	29.3689	35.8256	25.9857	NDUFS6	5	1801400	1816605	+	1451	protein_coding	NADH:ubiquinone oxidoreductase subunit S6 [Source:HGNC Symbol;Acc:HGNC:7713]	-
ENSG00000111716	61.7599	32.1771	45.8742	69.0387	20.7088	91.3537	41.7395	84.1408	50.8521	46.6848	39.9151	21.0346	44.6459	23.3036	37.2132	50.8221	18.8108	23.2585	LDHB	12	21635342	21757857	-	2983	protein_coding	lactate dehydrogenase B [Source:HGNC Symbol;Acc:HGNC:6541]	-
ENSG00000157873	60.6509	100.346	56.8137	49.7653	114.198	105.082	15.9192	50.1803	76.2503	19.0686	5.66974	10.8748	13.1282	11.427	5.89063	48.4999	13.8583	45.3689	TNFRSF14	1	2555639	2565382	+	6219	protein_coding	TNF receptor superfamily member 14 [Source:HGNC Symbol;Acc:HGNC:11912]	-
ENSG00000182534	56.6806	39.3557	85.7767	68.6402	55.8028	84.2679	36.1903	60.9287	76.4885	65.3648	14.0668	10.2151	17.8859	13.7656	29.3088	41.0006	10.9162	35.4608	MXRA7	17	76672551	76711016	-	9257	protein_coding	matrix remodeling associated 7 [Source:HGNC Symbol;Acc:HGNC:7541]	-
ENSG00000155115	67.7055	33.8406	68.1909	71.0356	39.2087	51.3422	57.7411	59.6095	45.7323	48.9182	39.185	27.9428	31.8427	28.8401	38.3838	42.5243	25.2245	24.5479	GTF3C6	6	110958560	110967890	+	1067	protein_coding	general transcription factor IIIC subunit 6 [Source:HGNC Symbol;Acc:HGNC:20872]	-
ENSG00000178449	45.1766	28.9854	70.8708	67.8559	29.09	42.0589	62.6428	47.1491	30.0401	56.5426	48.6641	35.676	43.7161	24.8825	51.8445	54.4772	31.6939	28.5548	COX14	12	50111979	50120457	+	1073	protein_coding	cytochrome c oxidase assembly factor COX14 [Source:HGNC Symbol;Acc:HGNC:28216]	-
ENSG00000198356	56.3692	31.4081	65.8775	61.1606	30.9279	44.6976	61.8966	53.3715	42.305	73.0585	38.8633	27.1702	38.7543	30.715	46.1456	36.621	28.9376	31.489	ASNA1	19	12737139	12748323	+	1652	protein_coding	arsA arsenite transporter, ATP-binding, homolog 1 (bacterial) [Source:HGNC Symbol;Acc:HGNC:752]	-
ENSG00000010278	23.4221	22.6691	36.5903	12.0723	9.95909	16.8968	22.6931	16.6714	26.9936	34.5116	110.301	42.6715	72.6416	88.2559	147.511	38.4602	56.4207	19.7437	CD9	12	6199715	6238271	+	4165	protein_coding	CD9 molecule [Source:HGNC Symbol;Acc:HGNC:1709]	-
ENSG00000135046	71.6288	44.1071	45.1401	77.0947	20.9211	30.6787	112.23	87.6053	46.844	64.6754	10.1753	37.3248	20.416	17.2797	13.8824	50.5809	5.81581	41.7617	ANXA1	9	73151757	73170393	+	4561	protein_coding	annexin A1 [Source:HGNC Symbol;Acc:HGNC:533]	-
ENSG00000125835	52.1143	49.5425	66.9708	54.7413	60.4558	56.9388	43.9969	54.1566	45.5012	33.6195	25.8816	40.6899	36.2573	33.0517	47.9323	35.3835	24.8613	33.364	SNRPB	20	2461634	2470853	-	1278	protein_coding	small nuclear ribonucleoprotein polypeptides B and B1 [Source:HGNC Symbol;Acc:HGNC:11153]	-
ENSG00000170027	39.5136	33.7951	41.4825	58.1932	30.8259	45.2337	109.085	66.6919	34.938	100.412	29.5708	30.9964	35.7003	21.9967	31.1028	30.6577	20.573	34.0951	YWHAG	7	76326794	76359031	-	3750	protein_coding	tyrosine 3-monooxygenase/tryptophan 5-monooxygenase activation protein gamma [Source:HGNC Symbol;Acc:HGNC:12852]	-
ENSG00000180964	49.9972	42.6256	73.235	44.9781	41.2767	35.4453	44.958	43.3738	44.7097	50.8409	42.3122	40.347	43.8842	23.6964	39.5602	77.2715	30.175	23.777	TCEAL8	X	103252995	103255203	-	1222	protein_coding	transcription elongation factor A like 8 [Source:HGNC Symbol;Acc:HGNC:28683]	-
ENSG00000165280	61.0154	35.8779	57.3602	68.7668	36.0217	52.6303	66.9254	52.653	41.9846	71.2381	31.6683	34.7694	35.739	24.6217	31.604	27.2394	24.6485	35.0043	VCP	9	35056064	35073249	-	5438	protein_coding	valosin containing protein [Source:HGNC Symbol;Acc:HGNC:12666]	-
ENSG00000205795	0.471648	1.27894	0.544221	0.0476683	1.14639	0.28979	0.433198	0.315209	0.313912	0.189593	169.213	57.394	126.621	139.518	109.718	3.58948	157.419	20.4969	CYS1	2	10056780	10080944	-	2847	protein_coding	cystin 1 [Source:HGNC Symbol;Acc:HGNC:18525]	-
ENSG00000101474	27.66	21.8029	24.8005	42.0574	21.4973	30.0562	113.445	54.762	25.9056	93.393	55.6753	40.7512	41.174	43.7174	60.7573	23.2994	34.3085	30.5062	APMAP	20	24962925	24992979	-	2454	protein_coding	adipocyte plasma membrane associated protein [Source:HGNC Symbol;Acc:HGNC:13238]	-
ENSG00000113721	73.1503	68.7038	57.2432	49.8675	53.7207	67.5446	48.4171	63.0504	50.6813	65.8736	11.0265	28.7864	23.6074	12.5255	11.6248	29.6969	13.1513	56.6372	PDGFRB	5	150113837	150155872	-	7137	protein_coding	platelet derived growth factor receptor beta [Source:HGNC Symbol;Acc:HGNC:8804]	-
ENSG00000182636	55.9435	35.1197	75.8731	71.6159	36.0781	35.7614	76.9044	70.8719	55.631	100.379	10.0562	22.1365	29.2814	8.57561	17.358	33.2879	12.655	37.0337	NDN	15	23685400	23687330	-	1931	protein_coding	necdin, MAGE family member [Source:HGNC Symbol;Acc:HGNC:7675]	-
ENSG00000121064	45.2706	33.3773	38.9581	54.1368	44.5099	33.1683	106.998	108.245	43.8232	54.3553	27.0079	17.6009	41.7214	20.949	22.5502	28.4192	25.3818	38.0529	SCPEP1	17	56978105	57006768	+	3853	protein_coding	serine carboxypeptidase 1 [Source:HGNC Symbol;Acc:HGNC:29507]	-
ENSG00000116459	37.0327	23.4993	43.6927	61.8586	18.9268	29.826	78.7621	43.1558	41.5284	76.139	55.5879	31.4442	56.6991	33.6624	36.5268	44.6318	39.3052	32.0861	ATP5PB	1	111448864	111462773	+	3383	protein_coding	ATP synthase peripheral stalk-membrane subunit b [Source:HGNC Symbol;Acc:HGNC:840]	-
ENSG00000188612	45.7948	50.0314	53.3375	48.6783	46.8994	32.1988	40.266	47.6878	39.2609	43.156	46.7867	40.2369	37.2585	33.6409	58.4636	70.0527	28.0515	22.2373	SUMO2	17	75165586	75182983	-	3372	protein_coding	small ubiquitin-like modifier 2 [Source:HGNC Symbol;Acc:HGNC:11125]	-
ENSG00000265354	66.0403	39.439	55.9913	80.0166	45.113	46.0452	60.6932	62.5133	43.8321	50.5317	36.0015	24.9314	28.6855	24.3124	27.8402	40.5592	23.6948	27.0171	TIMM23	10	45972449	46003734	+	1222	protein_coding	translocase of inner mitochondrial membrane 23 [Source:HGNC Symbol;Acc:HGNC:17312]	-
ENSG00000162458	75.5956	68.9511	98.7856	67.4386	59.744	70.6245	24.5351	29.6494	66.9711	78.5047	9.46654	14.4984	15.5917	12.6465	12.286	35.4185	4.72842	37.7284	FBLIM1	1	15756607	15786594	+	4716	protein_coding	filamin binding LIM protein 1 [Source:HGNC Symbol;Acc:HGNC:24686]	-
ENSG00000078668	63.2275	40.0255	54.3596	81.1419	40.8834	47.4111	48.3853	48.4807	58.7837	62.5865	31.9912	21.3685	30.1503	24.57	25.8061	45.7605	25.165	31.2226	VDAC3	8	42391624	42405897	+	3141	protein_coding	voltage dependent anion channel 3 [Source:HGNC Symbol;Acc:HGNC:12674]	-
ENSG00000143248	47.4827	69.0842	30.5018	18.9909	18.7046	28.8477	75.3245	56.4905	24.0907	26.3673	65.9143	19.5572	33.9942	53.6436	59.255	95.5104	32.9841	22.0041	RGS5	1	163111121	163321791	-	6821	protein_coding	regulator of G protein signaling 5 [Source:HGNC Symbol;Acc:HGNC:10001]	-
ENSG00000092199	41.4464	37.01	45.5852	45.8159	36.9574	28.2762	43.4197	43.5026	34.8157	45.1445	60.0324	53.8698	46.4333	35.4202	68.032	46.2026	38.7847	27.7938	HNRNPC	14	21209136	21269494	-	7309	protein_coding	heterogeneous nuclear ribonucleoprotein C (C1/C2) [Source:HGNC Symbol;Acc:HGNC:5035]	-
ENSG00000112110	63.0376	49.2105	57.3333	73.9259	54.9825	46.0218	42.687	53.273	52.9941	48.5597	27.5357	28.5168	31.164	22.2189	32.0883	44.0356	18.4789	32.1621	MRPL18	6	159789812	159798436	+	1375	protein_coding	mitochondrial ribosomal protein L18 [Source:HGNC Symbol;Acc:HGNC:14477]	-
ENSG00000106991	45.2656	28.5435	31.8621	43.2657	23.7667	55.7919	69.5797	62.1881	25.3463	34.6084	32.5723	50.0593	45.6041	54.4486	56.1267	9.95954	43.0264	61.9812	ENG	9	127815012	127854756	-	3935	protein_coding	endoglin [Source:HGNC Symbol;Acc:HGNC:3349]	-
ENSG00000203950	53.3398	51.7706	57.6155	71.6644	59.7636	59.4153	38.6879	60.211	54.2111	43.7363	27.6165	21.5836	27.4098	27.4761	36.706	26.9012	23.8111	31.2992	RTL8A	X	135050932	135052196	-	1265	protein_coding	retrotransposon Gag like 8A [Source:HGNC Symbol;Acc:HGNC:24514]	-
ENSG00000130312	54.6352	33.3243	60.0276	78.9639	39.4905	41.9856	62.1446	52.1954	45.7631	50.1672	38.3	21.5461	37.9352	25.1584	39.3732	35.0642	27.8354	26.663	MRPL34	19	17292609	17306843	+	1686	protein_coding	mitochondrial ribosomal protein L34 [Source:HGNC Symbol;Acc:HGNC:14488]	-
ENSG00000166592	161.896	27.9932	21.7224	50.1077	30.8686	172.441	6.1013	8.20474	76.3145	32.6578	13.4285	21.2562	23.6269	35.7012	22.1416	12.1387	9.83584	43.4126	RRAD	16	66921679	66925644	-	1709	protein_coding	RRAD, Ras related glycolysis inhibitor and calcium channel regulator [Source:HGNC Symbol;Acc:HGNC:10446]	-
ENSG00000173369	27.3421	19.6157	26.904	63.448	35.805	50.5016	162.262	120.058	21.3611	57.281	9.89475	33.6429	29.2592	20.0227	17.4831	24.1598	3.73243	45.1617	C1QB	1	22652762	22661538	+	1601	protein_coding	complement C1q B chain [Source:HGNC Symbol;Acc:HGNC:1242]	-
ENSG00000171867	44.9792	45.9239	59.1499	48.7439	45.8954	38.6616	42.3939	49.4381	51.1794	59.6757	27.3098	45.8606	35.8407	16.5863	43.1665	57.2973	24.1803	31.0655	PRNP	20	4686236	4701590	+	2851	protein_coding	prion protein [Source:HGNC Symbol;Acc:HGNC:9449]	-
ENSG00000141504	52.6325	45.3387	52.6588	56.5397	51.6122	52.9768	55.548	56.7362	47.4323	47.3408	28.6144	16.8727	41.2429	21.3973	29.1787	33.0586	42.9345	34.7016	SAT2	17	7626234	7627876	-	1643	protein_coding	spermidine/spermine N1-acetyltransferase family member 2 [Source:HGNC Symbol;Acc:HGNC:23160]	-
ENSG00000118816	19.2211	20.9531	40.9031	21.0587	16.5445	14.3129	55.865	25.5925	28.4444	61.0614	58.8741	78.355	77.2317	44.3241	65.6597	44.1577	51.3353	41.4717	CCNI	4	77047158	77076005	-	3741	protein_coding	cyclin I [Source:HGNC Symbol;Acc:HGNC:1595]	-
ENSG00000138069	40.5024	27.5455	43.1511	44.9504	20.2463	35.5969	83.7343	48.1622	35.169	78.2439	45.8949	36.4718	47.1776	33.0739	39.8589	37.5971	33.2829	34.1717	RAB1A	2	65070696	65130331	-	3312	protein_coding	RAB1A, member RAS oncogene family [Source:HGNC Symbol;Acc:HGNC:9758]	-
ENSG00000169738	45.9596	23.5042	33.8228	55.3692	38.9057	57.1276	56.7377	65.5535	37.3709	49.3512	32.9002	17.3385	73.7197	21.4167	48.5613	14.9098	62.4264	29.72	DCXR	17	82035136	82037732	-	1902	protein_coding	dicarbonyl and L-xylulose reductase [Source:HGNC Symbol;Acc:HGNC:18985]	-
ENSG00000122691	64.2	31.4174	53.4096	118.255	42.3825	41.5154	122.571	97.6084	50.1437	71.9251	0.388466	1.00668	7.42076	1.873	0.642675	15.8089	0.59742	38.6812	TWIST1	7	19020991	19117672	-	2033	protein_coding	twist family bHLH transcription factor 1 [Source:HGNC Symbol;Acc:HGNC:12428]	bHLH
ENSG00000137507	89.6494	53.7355	54.5538	65.8167	75.2979	120.896	42.356	33.8362	36.7183	26.3772	21.1287	13.6337	18.1536	25.579	17.5471	19.4805	14.2729	30.2858	LRRC32	11	76657524	76670747	-	4459	protein_coding	leucine rich repeat containing 32 [Source:HGNC Symbol;Acc:HGNC:4161]	-
ENSG00000188186	49.4874	33.4094	59.639	49.0693	36.3834	55.3999	50.9924	44.5282	32.8985	40.7058	40.457	43.1737	38.7009	28.2219	49.6552	44.0758	33.049	28.5058	LAMTOR4	7	100148907	100155944	+	1936	protein_coding	late endosomal/lysosomal adaptor, MAPK and MTOR activator 4 [Source:HGNC Symbol;Acc:HGNC:33772]	-
ENSG00000069849	50.5882	25.4031	46.0742	51.1282	25.8815	39.3997	60.312	47.0363	41.5956	67.5966	45.6829	26.8567	48.2526	33.8416	58.6341	32.7854	19.572	36.7034	ATP1B3	3	141876124	141926514	+	2584	protein_coding	ATPase Na+/K+ transporting subunit beta 3 [Source:HGNC Symbol;Acc:HGNC:806]	-
ENSG00000105220	62.1477	30.1865	53.1089	85.3662	40.511	71.2092	68.2061	58.5874	60.7687	56.9791	20.2571	11.171	22.5836	20.4386	18.487	16.9555	17.3177	43.0384	GPI	19	34359480	34402413	+	10680	protein_coding	glucose-6-phosphate isomerase [Source:HGNC Symbol;Acc:HGNC:4458]	-
ENSG00000135390	45.0678	36.7089	52.4877	57.2975	41.9895	48.0424	43.5303	49.2997	39.6805	37.7474	36.8645	33.4135	38.9764	32.8387	45.3793	46.6664	40.7672	30.3573	ATP5MC2	12	53632726	53677408	-	3991	protein_coding	ATP synthase membrane subunit c locus 2 [Source:HGNC Symbol;Acc:HGNC:842]	-
ENSG00000166595	49.6955	37.0068	58.1531	52.8261	41.8717	44.9527	46.2101	45.9709	36.6949	37.1281	35.9926	34.9501	41.5875	37.0352	54.4321	42.023	29.0131	31.2535	CIAO2B	16	66932055	66934423	-	1070	protein_coding	cytosolic iron-sulfur assembly component 2B [Source:HGNC Symbol;Acc:HGNC:24261]	-
ENSG00000065054	32.1511	34.9441	28.3518	47.3462	22.3157	40.322	50.3907	46.8292	38.5175	28.2049	50.7614	34.2363	57.5494	65.0058	81.0264	13.2418	41.5207	43.5143	SLC9A3R2	16	2025356	2039026	+	3550	protein_coding	SLC9A3 regulator 2 [Source:HGNC Symbol;Acc:HGNC:11076]	-
ENSG00000134333	39.0077	19.634	31.3672	30.5187	15.6141	18.3739	87.9173	42.9734	30.0013	48.7184	58.0139	47.397	33.9602	66.8715	108.176	23.5898	25.6445	27.1117	LDHA	11	18394388	18408425	+	6210	protein_coding	lactate dehydrogenase A [Source:HGNC Symbol;Acc:HGNC:6535]	-
ENSG00000196683	38.305	31.0186	52.9149	30.4596	23.5535	29.59	48.2159	29.6934	24.329	40.5367	55.1317	73.2895	54.1932	29.8634	50.4818	81.1528	36.1523	25.221	TOMM7	7	22812628	22822852	-	1751	protein_coding	translocase of outer mitochondrial membrane 7 [Source:HGNC Symbol;Acc:HGNC:21648]	-
ENSG00000135926	47.3319	22.3692	34.7809	49.5143	17.565	59.7816	114.979	62.6117	30.3278	90.9287	35.3569	23.1471	26.7081	26.1162	38.7291	16.698	26.7402	30.361	TMBIM1	2	218274192	218292586	-	5098	protein_coding	transmembrane BAX inhibitor motif containing 1 [Source:HGNC Symbol;Acc:HGNC:23410]	-
ENSG00000150459	49.8799	39.5665	56.0812	56.4466	43.0207	35.7854	41.8138	44.9394	37.4922	42.0404	43.7338	31.1184	42.2029	31.7604	49.7491	49.396	33.8044	25.0217	SAP18	13	21140514	21149084	+	3396	protein_coding	Sin3A associated protein 18 [Source:HGNC Symbol;Acc:HGNC:10530]	-
ENSG00000091136	19.8531	66.3018	31.6351	57.0189	64.685	13.0039	44.8479	54.8473	39.7227	38.4536	33.1127	25.6851	34.848	44.9295	14.7485	52.0441	71.3992	44.7419	LAMB1	7	107923799	108003255	-	8140	protein_coding	laminin subunit beta 1 [Source:HGNC Symbol;Acc:HGNC:6486]	-
ENSG00000115307	53.2219	54.0272	41.929	50.5441	68.0826	63.7411	36.3516	52.0418	45.3074	30.3902	24.5861	28.413	31.5738	28.6101	35.6001	36.101	30.4699	39.3137	AUP1	2	74526645	74529939	-	2634	protein_coding	AUP1, lipid droplet regulating VLDL assembly factor [Source:HGNC Symbol;Acc:HGNC:891]	-
ENSG00000124193	37.509	57.6951	35.677	43.9962	66.3181	40.0391	18.9917	44.3889	59.9696	25.1728	34.976	33.5608	33.0949	44.6913	27.659	51.4744	51.0573	42.4257	SRSF6	20	43457928	43464247	+	4593	protein_coding	serine and arginine rich splicing factor 6 [Source:HGNC Symbol;Acc:HGNC:10788]	-
ENSG00000196576	51.3466	31.6375	37.4315	46.2377	39.3483	53.6038	28.3814	31.4483	37.8484	33.6864	57.5115	39.5141	38.0749	48.511	62.8966	10.315	57.6734	40.4409	PLXNB2	22	50274979	50307627	-	7257	protein_coding	plexin B2 [Source:HGNC Symbol;Acc:HGNC:9104]	-
ENSG00000118640	10.6473	8.99045	7.70003	14.3251	10.13	11.3338	33.013	18.7525	4.33312	10.0866	107.834	88.563	74.4012	68.7855	150.604	22.9675	72.1372	30.3335	VAMP8	2	85561562	85582031	+	990	protein_coding	vesicle associated membrane protein 8 [Source:HGNC Symbol;Acc:HGNC:12647]	-
ENSG00000138085	39.7714	32.8876	56.4812	40.9017	29.7148	31.6691	43.7872	46.2813	36.6513	44.3526	54.3482	37.7128	46.9368	38.6846	55.4293	43.099	40.9063	24.9807	ATRAID	2	27212027	27217178	+	2019	protein_coding	all-trans retinoic acid induced differentiation factor [Source:HGNC Symbol;Acc:HGNC:24090]	-
ENSG00000129009	100.822	37.1664	64.6907	70.9044	59.4525	103.26	32.8887	43.4254	43.9213	39.4269	6.99188	33.4526	15.4021	5.00621	13.8095	24.1612	7.82117	41.8022	ISLR	15	74173671	74176872	+	2671	protein_coding	immunoglobulin superfamily containing leucine rich repeat [Source:HGNC Symbol;Acc:HGNC:6133]	-
ENSG00000110717	64.7493	34.7391	61.1537	82.6182	54.5132	73.5834	50.0609	53.5703	55.3388	42.9382	24.8457	11.9908	24.3294	22.0356	24.5428	17.7475	19.6778	25.7497	NDUFS8	11	68030617	68036644	+	4523	protein_coding	NADH:ubiquinone oxidoreductase core subunit S8 [Source:HGNC Symbol;Acc:HGNC:7715]	-
ENSG00000119335	43.4747	35.638	49.8653	40.5421	34.5829	32.9066	45.6073	38.9844	37.7867	46.5405	48.7175	49.8028	43.6659	32.1578	55.1793	47.682	32.3175	26.1416	SET	9	128683424	128696400	+	4355	protein_coding	SET nuclear proto-oncogene [Source:HGNC Symbol;Acc:HGNC:10760]	-
ENSG00000117318	30.3378	34.6147	44.5592	18.0873	21.9599	23.2772	47.7928	37.3605	19.0644	19.314	64.1905	27.4368	38.9783	97.6947	53.58	40.2912	76.9151	45.7611	ID3	1	23557918	23559794	-	1797	protein_coding	inhibitor of DNA binding 3, HLH protein [Source:HGNC Symbol;Acc:HGNC:5362]	bHLH
ENSG00000146374	79.7264	30.575	60.9231	112.574	31.9014	48.7649	59.4104	76.9065	60.1239	82.1965	2.74732	4.31626	14.3167	1.81063	7.68247	31.7121	0.825241	34.5091	RSPO3	6	127118604	127197765	+	3179	protein_coding	R-spondin 3 [Source:HGNC Symbol;Acc:HGNC:20866]	-
ENSG00000125817	53.7822	35.5246	49.6462	68.1904	39.9092	66.1188	53.8293	42.2632	38.7483	53.2358	37.541	29.9879	32.6985	30.5416	35.6366	17.5958	25.7281	29.2554	CENPB	20	3783851	3786690	-	2840	protein_coding	centromere protein B [Source:HGNC Symbol;Acc:HGNC:1852]	-
ENSG00000146278	86.1006	44.4527	36.2493	36.5133	61.8205	23.6314	47.1974	34.4736	42.455	37.1092	28.4139	44.088	44.8082	26.2523	24.9246	38.2709	29.7144	53.6451	PNRC1	6	89080751	89085160	+	2992	protein_coding	proline rich nuclear receptor coactivator 1 [Source:HGNC Symbol;Acc:HGNC:17278]	-
ENSG00000089693	45.227	35.9122	51.2395	57.3033	31.8758	48.7906	50.4998	47.3207	42.5304	55.9185	41.7379	27.31	38.6097	33.2573	44.8163	22.7169	30.1695	34.2989	MLF2	12	6747996	6767475	-	3781	protein_coding	myeloid leukemia factor 2 [Source:HGNC Symbol;Acc:HGNC:7126]	-
ENSG00000185896	40.7468	26.0743	39.1574	36.3932	19.1394	45.6866	57.5348	41.7114	28.4146	57.4288	49.8558	46.2376	51.5478	42.5563	60.0505	16.8095	45.8649	33.2002	LAMP1	13	113297241	113323672	+	5739	protein_coding	lysosomal associated membrane protein 1 [Source:HGNC Symbol;Acc:HGNC:6499]	-
ENSG00000164442	35.2249	15.9594	25.206	31.3449	18.7739	9.66605	83.172	23.143	44.938	50.5063	42.8092	49.3205	46.1347	37.0108	47.6355	20.9827	80.2996	76.0513	CITED2	6	139371807	139374620	-	2535	protein_coding	Cbp/p300 interacting transactivator with Glu/Asp rich carboxy-terminal domain 2 [Source:HGNC Symbol;Acc:HGNC:1987]	-
ENSG00000149932	48.5293	34.7626	45.9459	47.3985	37.7849	63.3045	40.7288	48.0949	31.4834	35.2362	41.8066	39.042	38.5864	36.3806	55.8818	32.577	31.7945	27.9478	TMEM219	16	29940885	29973052	+	2428	protein_coding	transmembrane protein 219 [Source:HGNC Symbol;Acc:HGNC:25201]	-
ENSG00000197451	48.3189	34.5555	53.6508	52.1262	28.8127	27.283	57.4979	51.6403	34.2643	56.8471	38.8506	39.5926	40.0612	36.8009	50.3928	26.9065	25.1069	34.4909	HNRNPAB	5	178204507	178211163	+	2144	protein_coding	heterogeneous nuclear ribonucleoprotein A/B [Source:HGNC Symbol;Acc:HGNC:5034]	-
ENSG00000103024	43.5359	53.6511	48.1653	53.4864	60.0395	51.8999	35.886	46.9273	39.1705	23.085	32.1173	41.8136	35.5325	31.3768	34.6375	34.7242	32.814	37.8546	NME3	16	1770286	1771730	-	1445	protein_coding	NME/NM23 nucleoside diphosphate kinase 3 [Source:HGNC Symbol;Acc:HGNC:7851]	-
ENSG00000174917	66.7408	30.0318	45.2284	69.5395	42.7296	67.9962	54.5177	52.5783	43.2553	41.7492	37.3101	23.7834	30.7026	25.3385	26.4542	27.0639	27.1736	24.2798	C19orf70	19	5678421	5680896	-	1854	protein_coding	chromosome 19 open reading frame 70 [Source:HGNC Symbol;Acc:HGNC:33702]	-
ENSG00000149257	80.8107	52.4312	54.1117	66.1705	50.6494	50.9783	74.678	79.3138	29.9088	42.3068	11.0278	23.7639	17.3987	14.1198	12.5691	25.1373	11.3392	38.5786	SERPINH1	11	75562056	75572783	+	6281	protein_coding	serpin family H member 1 [Source:HGNC Symbol;Acc:HGNC:1546]	-
ENSG00000058262	48.757	34.3028	44.9018	53.2792	36.5246	65.8164	52.6225	52.6246	30.6337	53.0347	32.2927	36.9768	36.4108	30.7025	34.8566	25.5209	29.923	35.9487	SEC61A1	3	128051641	128071683	+	4697	protein_coding	Sec61 translocon alpha 1 subunit [Source:HGNC Symbol;Acc:HGNC:18276]	-
ENSG00000089248	57.4918	22.2921	48.4871	54.1658	30.2962	34.5748	48.2409	38.4408	36.9889	54.8174	43.2163	45.3666	39.0651	33.6061	46.9923	27.5286	36.1806	37.0062	ERP29	12	112013316	112023451	+	3083	protein_coding	endoplasmic reticulum protein 29 [Source:HGNC Symbol;Acc:HGNC:13799]	-
ENSG00000165197	31.6829	42.5616	69.2875	80.0214	68.1613	41.0408	31.2456	78.8821	87.6411	114.121	0.0863094	3.17577	12.4539	0.205651	0.326768	40.4403	0.361038	32.5926	VEGFD	X	15345591	15384376	-	2153	protein_coding	vascular endothelial growth factor D [Source:HGNC Symbol;Acc:HGNC:3708]	-
ENSG00000125520	37.848	46.1317	43.4991	49.5009	47.6794	51.0682	57.5088	54.338	42.4285	33.7236	27.3271	35.4653	39.999	35.6345	29.6273	19.8328	47.11	35.3426	SLC2A4RG	20	63739861	63743505	+	2244	protein_coding	SLC2A4 regulator [Source:HGNC Symbol;Acc:HGNC:15930]	Others
ENSG00000124702	49.7807	37.8471	56.6347	57.0003	51.6114	54.5935	47.6744	45.7812	34.1134	50.9293	31.799	30.7323	36.2936	24.6055	31.4107	26.978	33.7357	31.8896	KLHDC3	6	43014103	43021298	+	2019	protein_coding	kelch domain containing 3 [Source:HGNC Symbol;Acc:HGNC:20704]	-
ENSG00000213585	42.6651	26.4768	41.4022	53.9114	26.2093	24.6492	59.5159	50.9097	37.6169	52.9019	45.5454	35.2489	60.0415	35.0799	39.4964	30.7094	38.0456	31.8142	VDAC1	5	133971915	134005133	-	3163	protein_coding	voltage dependent anion channel 1 [Source:HGNC Symbol;Acc:HGNC:12669]	-
ENSG00000102804	20.6047	25.4623	46.4566	28.8779	16.698	16.8254	44.2746	34.4587	45.8685	43.7109	46.8726	41.7947	62.4138	75.4654	54.4018	49.3228	29.5307	48.9589	TSC22D1	13	44432143	44577147	-	8586	protein_coding	TSC22 domain family member 1 [Source:HGNC Symbol;Acc:HGNC:16826]	TSC22
ENSG00000197894	35.2943	34.9509	64.727	43.3547	26.9146	22.6689	64.1243	41.4606	51.1441	81.8751	33.1951	23.7632	39.9792	20.1639	28.8439	64.0645	29.2931	25.6246	ADH5	4	99070978	99088801	-	4866	protein_coding	alcohol dehydrogenase 5 (class III), chi polypeptide [Source:HGNC Symbol;Acc:HGNC:253]	-
ENSG00000123091	36.5803	31.6354	48.3182	51.6635	31.0202	34.4864	75.8837	60.3992	36.0498	64.7482	35.9803	32.4341	43.3079	23.1737	34.7999	38.2649	23.7776	28.6811	RNF11	1	51236271	51273455	+	3122	protein_coding	ring finger protein 11 [Source:HGNC Symbol;Acc:HGNC:10056]	-
ENSG00000115648	72.4735	51.4395	76.5584	73.4277	71.385	104.309	14.8095	34.284	64.4411	57.6047	1.61366	0.117614	9.74361	1.24333	2.07991	39.7944	1.53234	53.6253	MLPH	2	237485428	237555318	+	7514	protein_coding	melanophilin [Source:HGNC Symbol;Acc:HGNC:29643]	-
ENSG00000182087	44.071	53.7955	37.9912	44.4405	50.5822	46.5833	32.9461	44.6781	47.15	33.4494	30.5289	34.7435	32.3467	41.0694	34.9808	23.9319	38.6995	57.6491	TMEM259	19	1009648	1021179	-	4031	protein_coding	transmembrane protein 259 [Source:HGNC Symbol;Acc:HGNC:17039]	-
ENSG00000143933	39.675	34.5067	42.1448	33.0254	25.394	25.6084	35.5814	23.273	33.4668	49.0434	59.5321	56.7999	53.3497	42.2362	60.8296	53.783	37.1767	23.7774	CALM2	2	47160082	47176601	-	6466	protein_coding	calmodulin 2 [Source:HGNC Symbol;Acc:HGNC:1445]	-
ENSG00000106565	9.63493	11.5248	20.0114	14.1609	15.3826	12.7569	31.67	17.0615	13.036	16.6377	111.715	65.7155	62.9078	61.2134	129.224	15.3882	88.8178	32.3187	TMEM176B	7	150791285	150801360	-	1979	protein_coding	transmembrane protein 176B [Source:HGNC Symbol;Acc:HGNC:29596]	-
ENSG00000158022	87.8837	44.7535	96.059	76.5587	72.2106	72.6272	24.4894	59.1612	67.8471	45.6067	0.108331	0.0542322	8.64722	0.240915	0.0781224	33.6206	0.84967	38.3755	TRIM63	1	26051304	26068436	-	2573	protein_coding	tripartite motif containing 63 [Source:HGNC Symbol;Acc:HGNC:16007]	-
ENSG00000148672	47.2015	28.2389	37.02	54.5894	26.6269	41.5212	50.8505	37.838	35.623	57.9344	48.0402	36.1505	65.2076	32.2985	36.1148	26.9638	42.3144	24.4241	GLUD1	10	87050486	87094866	-	3519	protein_coding	glutamate dehydrogenase 1 [Source:HGNC Symbol;Acc:HGNC:4335]	-
ENSG00000210195	74.26	8.42855	83.5735	51.406	14.3858	2.5001	17.8372	5.94868	186.866	29.442	4.22327	32.4183	29.7733	26.8344	7.61397	2.32255	27.9716	121.826	MT-TT	MT	15888	15953	+	66	Mt_tRNA	mitochondrially encoded tRNA threonine [Source:HGNC Symbol;Acc:HGNC:7499]	-
ENSG00000119013	40.4783	25.9046	46.9174	46.8778	16.8394	30.3684	71.9172	41.5953	36.7314	52.3132	62.2502	29.7718	47.5268	30.5482	38.3612	50.0307	33.9151	24.3542	NDUFB3	2	201071433	201085750	+	1103	protein_coding	NADH:ubiquinone oxidoreductase subunit B3 [Source:HGNC Symbol;Acc:HGNC:7698]	-
ENSG00000266412	30.2859	19.2912	32.4542	38.1284	15.4936	25.9099	91.6693	56.7613	27.1099	84.9949	51.5241	39.9108	45.5016	26.4423	33.4234	45.8225	33.4085	28.0896	NCOA4	10	46005088	46030714	-	4079	protein_coding	nuclear receptor coactivator 4 [Source:HGNC Symbol;Acc:HGNC:7671]	-
ENSG00000011465	9.96609	30.4955	69.4823	14.2715	44.3986	6.51189	50.1907	63.0903	25.3867	39.6834	25.6598	75.4341	50.7027	8.32322	52.1963	112.995	15.3609	31.8102	DCN	12	91140484	91183123	-	12847	protein_coding	decorin [Source:HGNC Symbol;Acc:HGNC:2705]	-
ENSG00000004776	28.3615	46.3399	77.2808	105.115	49.273	43.2411	61.4019	48.5919	99.8431	64.9543	2.48341	8.91886	12.6703	1.46646	7.53345	8.43191	1.46791	58.5771	HSPB6	19	35754569	35758079	-	1721	protein_coding	heat shock protein family B (small) member 6 [Source:HGNC Symbol;Acc:HGNC:26511]	-
ENSG00000235552	39.5751	46.6277	55.0107	53.5377	62.4037	29.4249	44.2307	56.7308	34.9147	31.8167	24.1337	47.58	31.6941	20.1073	35.1535	62.9327	22.2854	26.7543	RPL6P27	18	6462144	6463015	-	872	transcribed_processed_pseudogene	ribosomal protein L6 pseudogene 27 [Source:HGNC Symbol;Acc:HGNC:36133]	-
ENSG00000169764	39.0793	20.2721	52.0613	72.3023	28.2604	44.621	96.9772	88.9153	59.168	86.4745	14.7779	11.9342	17.161	8.39767	11.1079	26.1337	8.84808	35.8957	UGP2	2	63840940	63891562	+	6501	protein_coding	UDP-glucose pyrophosphorylase 2 [Source:HGNC Symbol;Acc:HGNC:12527]	-
ENSG00000124767	43.7603	28.7259	45.8232	50.6899	31.9666	32.6575	46.073	47.5504	43.0387	47.5282	49.4583	36.0517	47.4065	30.6097	35.7449	46.2516	32.099	25.8984	GLO1	6	38675925	38703141	-	2352	protein_coding	glyoxalase I [Source:HGNC Symbol;Acc:HGNC:4323]	-
ENSG00000075415	41.8563	29.2308	43.744	56.2618	21.9262	43.4403	64.3528	40.8678	43.9285	79.6974	34.7689	24.0147	40.7863	25.6373	26.8829	39.9189	30.3038	33.4351	SLC25A3	12	98593591	98606379	+	8896	protein_coding	solute carrier family 25 member 3 [Source:HGNC Symbol;Acc:HGNC:10989]	-
ENSG00000089597	37.5339	29.0961	41.7444	40.8214	30.4965	30.5573	50.8328	48.5721	32.0645	53.3868	39.7693	44.636	47.4719	39.673	44.8873	23.2828	42.6133	42.3606	GANAB	11	62624826	62646726	-	5030	protein_coding	glucosidase II alpha subunit [Source:HGNC Symbol;Acc:HGNC:4138]	-
ENSG00000185624	46.7429	28.4851	47.6243	48.4319	29.2734	44.2154	59.8232	46.6004	34.1551	53.7836	36.5568	42.0838	42.6613	30.6506	39.7905	20.9183	34.6937	33.1616	P4HB	17	81843159	81860694	-	5303	protein_coding	prolyl 4-hydroxylase subunit beta [Source:HGNC Symbol;Acc:HGNC:8548]	-
ENSG00000175445	4.39629	6.13825	6.84379	36.1186	4.10231	3.72704	277.025	152.19	16.1083	122.51	12.7614	2.51509	20.334	2.67701	12.4054	1.74867	20.3063	17.3442	LPL	8	19901717	19967259	+	4383	protein_coding	lipoprotein lipase [Source:HGNC Symbol;Acc:HGNC:6677]	-
ENSG00000100348	43.7223	27.3578	38.0925	49.3196	28.2812	56.8668	49.9343	45.6088	46.7052	51.8706	47.3398	26.7281	41.6198	34.4927	39.5889	29.0874	35.1451	25.7321	TXN2	22	36467036	36482030	-	2050	protein_coding	thioredoxin 2 [Source:HGNC Symbol;Acc:HGNC:17772]	-
ENSG00000060762	34.2644	22.2762	36.9209	36.0347	26.4081	22.627	31.656	27.7536	29.9829	26.4648	89.3061	19.5259	72.2446	53.8424	42.7761	26.9032	90.1882	27.5409	MPC1	6	166364919	166383013	-	1546	protein_coding	mitochondrial pyruvate carrier 1 [Source:HGNC Symbol;Acc:HGNC:21606]	-
ENSG00000115128	35.2803	40.4317	46.5466	38.7181	33.9589	31.7744	44.3514	42.1243	43.1547	38.8707	42.769	41.6559	38.3931	25.486	52.7711	69.2381	29.9124	21.1186	SF3B6	2	24067584	24076443	-	1197	protein_coding	splicing factor 3b subunit 6 [Source:HGNC Symbol;Acc:HGNC:30096]	-
ENSG00000137673	0.173411	0.108849	0.133396	0.321315	10.448	0.177579	3.7888	0.0482889	0.0512961	0.39501	27.6776	262.5	67.918	77.1937	40.7123	40.7362	7.5498	175.45	MMP7	11	102520508	102530753	-	2323	protein_coding	matrix metallopeptidase 7 [Source:HGNC Symbol;Acc:HGNC:7174]	-
ENSG00000170144	36.8581	39.3723	38.8518	35.8794	31.8691	31.8908	42.3724	38.247	40.461	43.527	41.9128	41.7948	39.2749	39.7706	37.3414	60.3872	36.6239	38.6803	HNRNPA3	2	177212563	177223958	+	6033	protein_coding	heterogeneous nuclear ribonucleoprotein A3 [Source:HGNC Symbol;Acc:HGNC:24941]	-
ENSG00000143162	37.3903	24.7624	38.551	48.9611	21.6345	28.1706	72.4376	45.0442	30.0803	70.6333	37.5918	31.0701	38.4651	24.5368	58.8468	47.7219	29.244	28.2136	CREG1	1	167529117	167553805	-	3286	protein_coding	cellular repressor of E1A stimulated genes 1 [Source:HGNC Symbol;Acc:HGNC:2351]	-
ENSG00000164924	46.2401	35.527	43.4882	36.248	24.2707	34.8143	55.9025	39.9464	36.5352	51.6993	38.6744	48.2476	43.1233	40.1622	45.9054	40.9725	22.3688	28.6445	YWHAZ	8	100916525	100953388	-	8555	protein_coding	tyrosine 3-monooxygenase/tryptophan 5-monooxygenase activation protein zeta [Source:HGNC Symbol;Acc:HGNC:12855]	-
ENSG00000143612	32.7649	24.6038	37.2087	37.1301	23.1365	26.8213	60.9519	39.5764	30.2811	62.3667	46.1254	39.4404	56.2423	33.2822	51.7955	41.3745	40.3032	27.7873	C1orf43	1	154206696	154220637	-	2670	protein_coding	chromosome 1 open reading frame 43 [Source:HGNC Symbol;Acc:HGNC:29876]	-
ENSG00000122035	64.948	20.5835	34.6897	83.9424	21.5953	46.1286	42.8388	27.3531	50.2251	96.1881	15.9907	24.5168	23.029	39.2602	21.5676	22.0557	28.7186	46.9601	RASL11A	13	27270327	27273690	+	1624	protein_coding	RAS like family 11 member A [Source:HGNC Symbol;Acc:HGNC:23802]	-
ENSG00000121691	16.8128	12.1427	20.0429	39.1825	11.4385	9.5143	42.5992	47.1042	17.3596	87.2954	85.8595	27.9338	42.9592	42.0198	129.312	20.7658	40.7874	15.6609	CAT	11	34438925	34472062	+	3590	protein_coding	catalase [Source:HGNC Symbol;Acc:HGNC:1516]	-
ENSG00000147684	55.2843	27.1085	57.5684	77.3253	39.0792	47.1389	56.8244	53.3966	40.2523	44.4331	31.9512	17.23	29.2858	23.3138	26.6437	31.7951	26.5747	22.9203	NDUFB9	8	124539101	124580648	+	4106	protein_coding	NADH:ubiquinone oxidoreductase subunit B9 [Source:HGNC Symbol;Acc:HGNC:7704]	-
ENSG00000137547	51.5805	28.7462	46.9372	53.8973	22.2219	43.8493	60.3431	49.7771	44.3727	60.9564	42.9065	21.7921	38.6397	26.2092	24.5143	32.9058	31.2868	26.1348	MRPL15	8	54135210	54147901	+	1191	protein_coding	mitochondrial ribosomal protein L15 [Source:HGNC Symbol;Acc:HGNC:14054]	-
ENSG00000124942	32.3675	37.3965	37.2906	26.602	26.334	31.3991	43.14	25.4606	44.6463	55.2304	35.2197	55.2065	48.5483	40.1778	51.5973	30.1642	50.1347	36.1004	AHNAK	11	62433542	62556235	-	19465	protein_coding	AHNAK nucleoprotein [Source:HGNC Symbol;Acc:HGNC:347]	-
ENSG00000167792	37.9707	26.4907	36.8522	69.144	29.5944	40.4766	61.259	38.7966	39.5161	62.1531	39.4927	20.1064	40.926	36.0728	29.3444	17.7326	40.6853	39.7856	NDUFV1	11	67605653	67612554	+	5057	protein_coding	NADH:ubiquinone oxidoreductase core subunit V1 [Source:HGNC Symbol;Acc:HGNC:7716]	-
ENSG00000071127	46.7238	32.8226	56.2035	43.5727	30.8572	38.9379	32.732	25.6898	46.6702	94.0581	35.7071	30.6047	41.862	29.993	33.5785	28.9983	23.1583	33.7602	WDR1	4	10074339	10116949	-	7827	protein_coding	WD repeat domain 1 [Source:HGNC Symbol;Acc:HGNC:12754]	-
ENSG00000134248	41.6105	32.8459	53.9304	50.0679	33.9946	37.6239	48.3598	50.9674	30.6136	42.2232	39.3359	32.8981	45.4176	25.8652	44.9071	40.7828	30.9844	23.3143	LAMTOR5	1	110401249	110407942	-	2388	protein_coding	late endosomal/lysosomal adaptor, MAPK and MTOR activator 5 [Source:HGNC Symbol;Acc:HGNC:17955]	-
ENSG00000101911	60.1526	28.3478	68.7173	55.6772	53.7687	59.4394	29.1885	41.6895	39.8571	95.7808	19.3876	12.8679	42.6113	16.68	15.7608	25.6222	13.1408	26.8345	PRPS2	X	12791355	12824222	+	2758	protein_coding	phosphoribosyl pyrophosphate synthetase 2 [Source:HGNC Symbol;Acc:HGNC:9465]	-
ENSG00000185885	15.9145	28.2825	13.1986	24.0009	16.5936	9.93094	58.5514	83.0927	15.9984	28.7378	27.8736	89.8824	69.7858	42.1449	54.1607	51.6639	32.9729	42.3008	IFITM1	11	313506	315272	+	1080	protein_coding	interferon induced transmembrane protein 1 [Source:HGNC Symbol;Acc:HGNC:5412]	-
ENSG00000115524	35.6576	64.7096	35.4786	33.8169	58.5319	35.3727	22.4508	37.2428	60.9653	29.2326	26.7918	35.8746	32.3098	30.4294	24.5777	66.3682	36.6063	37.5555	SF3B1	2	197389784	197435091	-	9164	protein_coding	splicing factor 3b subunit 1 [Source:HGNC Symbol;Acc:HGNC:10768]	-
ENSG00000083720	34.0658	15.5548	24.4121	35.1737	12.0267	35.4484	123.12	46.0977	40.7289	148.688	30.8821	10.2919	33.931	14.7906	8.89059	28.204	28.4728	33.0418	OXCT1	5	41730065	41870519	-	4194	protein_coding	3-oxoacid CoA-transferase 1 [Source:HGNC Symbol;Acc:HGNC:8527]	-
ENSG00000100804	39.9031	23.982	47.4739	44.6349	15.8356	29.9629	74.8629	38.4192	26.3302	68.3811	43.9555	31.571	41.9117	29.6516	48.7432	33.8711	32.067	31.2676	PSMB5	14	23016543	23035230	-	1765	protein_coding	proteasome subunit beta 5 [Source:HGNC Symbol;Acc:HGNC:9542]	-
ENSG00000245910	36.0732	48.5841	46.5689	42.4983	50.966	28.2509	39.2464	40.6151	30.8652	21.7726	35.6895	56.3604	33.9562	22.5467	50.8567	69.8219	22.2847	25.7427	SNHG6	8	66921684	66926398	-	1247	processed_transcript	small nucleolar RNA host gene 6 [Source:HGNC Symbol;Acc:HGNC:32965]	-
ENSG00000152795	33.214	53.3141	33.0817	27.7446	38.9685	22.042	30.1081	36.207	44.3807	29.7288	41.4846	41.077	39.0563	41.6328	38.2306	74.9647	40.1096	36.1296	HNRNPDL	4	82422564	82430408	-	5476	protein_coding	heterogeneous nuclear ribonucleoprotein D like [Source:HGNC Symbol;Acc:HGNC:5037]	-
ENSG00000168374	40.0765	28.5694	42.5353	36.3728	18.8658	19.521	73.407	49.0199	34.1181	53.7898	44.0034	35.5078	42.4787	33.9711	47.6186	41.0148	27.09	33.4729	ARF4	3	57571363	57598220	-	2595	protein_coding	ADP ribosylation factor 4 [Source:HGNC Symbol;Acc:HGNC:655]	-
ENSG00000106049	26.9944	22.1617	33.1089	44.4583	20.7171	15.6269	63.0341	38.6794	41.7037	74.0993	71.6938	22.5458	59.0769	31.0109	31.3454	35.6112	47.2647	22.0787	HIBADH	7	27525442	27662995	-	2323	protein_coding	3-hydroxyisobutyrate dehydrogenase [Source:HGNC Symbol;Acc:HGNC:4907]	-
ENSG00000165637	37.1676	25.9386	42.6399	49.3977	21.8306	26.2072	64.8842	43.5487	40.76	61.5189	41.7562	25.8644	46.8405	29.758	45.1861	33.5099	33.4937	30.7474	VDAC2	10	75210154	75231448	+	2827	protein_coding	voltage dependent anion channel 2 [Source:HGNC Symbol;Acc:HGNC:12672]	-
ENSG00000145824	0.713885	0.17924	0.156901	0.549718	2.70416	0.125321	0.170308	0	0.0603346	0.464612	93.7823	147.099	145.328	58.5574	120.402	7.78732	83.0449	38.9227	CXCL14	5	135570679	135579279	-	1975	protein_coding	C-X-C motif chemokine ligand 14 [Source:HGNC Symbol;Acc:HGNC:10640]	-
ENSG00000086061	31.3562	20.9324	34.5067	30.647	19.237	20.8525	76.0196	34.8236	23.1338	60.2842	52.2588	46.5132	50.7803	35.5187	51.4855	47.6711	35.5914	27.3105	DNAJA1	9	33025211	33039907	+	2730	protein_coding	DnaJ heat shock protein family (Hsp40) member A1 [Source:HGNC Symbol;Acc:HGNC:5229]	-
ENSG00000135624	48.8914	27.7572	54.3821	48.6196	30.5878	29.362	46.256	38.9068	37.7293	51.6923	41.0226	35.7365	35.7629	36.8541	48.1251	30.0089	30.2235	26.5466	CCT7	2	73233420	73253021	+	3591	protein_coding	chaperonin containing TCP1 subunit 7 [Source:HGNC Symbol;Acc:HGNC:1622]	-
ENSG00000162772	122.878	36.8645	19.5439	4.43415	59.4589	20.3603	34.5517	5.56711	31.5747	12.8262	22.699	5.54935	18.4987	139.264	27.5641	30.5059	5.0386	100.416	ATF3	1	212565334	212620777	+	4040	protein_coding	activating transcription factor 3 [Source:HGNC Symbol;Acc:HGNC:785]	TF_bZIP
ENSG00000133110	38.9269	17.4093	12.9305	103.498	24.2079	18.678	84.0179	141.943	55.3605	88.1177	0.578149	12.7945	18.7821	0.388961	0.51503	16.9167	1.39594	60.7236	POSTN	13	37562583	37598844	-	5464	protein_coding	periostin [Source:HGNC Symbol;Acc:HGNC:16953]	-
ENSG00000163902	41.9451	32.0758	53.4216	37.1235	31.7518	20.8118	47.4514	42.6277	29.8051	48.1088	38.0772	47.7133	53.6546	31.7546	41.667	36.8758	33.3577	28.8696	RPN1	3	128619970	128681075	-	3992	protein_coding	ribophorin I [Source:HGNC Symbol;Acc:HGNC:10381]	-
ENSG00000135535	32.582	29.9807	38.0662	34.6342	27.9907	25.4173	62.6336	56.827	29.9721	44.6138	50.1372	38.9159	44.7747	31.9695	55.3639	39.3184	30.4532	22.4937	CD164	6	109366514	109382812	-	7206	protein_coding	CD164 molecule [Source:HGNC Symbol;Acc:HGNC:1632]	-
ENSG00000156467	52.6194	38.9839	62.4543	57.8189	36.7226	37.7995	45.0556	49.6561	44.4814	36.8866	32.6268	24.5948	35.3121	18.0024	26.4322	54.1257	22.3483	19.3242	UQCRB	8	96225920	96235634	-	9715	protein_coding	ubiquinol-cytochrome c reductase binding protein [Source:HGNC Symbol;Acc:HGNC:12582]	-
ENSG00000007080	56.1785	32.9018	70.6002	58.6585	46.9011	47.3151	41.7747	50.5464	40.4142	38.1416	28.7971	24.8818	26.6918	27.5796	32.9061	20.931	24.0862	24.2919	CCDC124	19	17933016	17943991	+	1660	protein_coding	coiled-coil domain containing 124 [Source:HGNC Symbol;Acc:HGNC:25171]	-
ENSG00000042753	59.062	33.0613	54.3744	48.1442	37.0187	53.017	71.0617	62.144	30.035	47.6734	22.1648	28.4975	27.3418	17.7471	27.2494	24.0488	21.326	29.3126	AP2S1	19	46838136	46850992	-	1704	protein_coding	adaptor related protein complex 2 subunit sigma 1 [Source:HGNC Symbol;Acc:HGNC:565]	-
ENSG00000130821	84.101	29.9767	46.7694	63.3757	47.9221	129.262	34.3211	36.7966	44.6907	56.6278	12.6575	7.49558	20.1648	12.4584	7.59541	11.143	15.4989	31.2321	SLC6A8	X	153688099	153696593	+	5498	protein_coding	solute carrier family 6 member 8 [Source:HGNC Symbol;Acc:HGNC:11055]	-
ENSG00000170906	58.133	36.7178	49.13	76.5195	63.753	67.3026	47.2941	66.7159	34.9538	22.7031	19.9714	13.7378	23.4088	16.1543	24.8926	27.1481	17.6663	24.2422	NDUFA3	19	54102728	54109257	+	2475	protein_coding	NADH:ubiquinone oxidoreductase subunit A3 [Source:HGNC Symbol;Acc:HGNC:7686]	-
ENSG00000063046	28.1731	32.1152	33.7308	35.0762	28.6569	17.196	49.1823	38.6663	28.1519	51.9044	40.6811	54.3234	47.2473	26.007	48.5352	57.7804	42.0767	30.2187	EIF4B	12	53006158	53042209	+	6146	protein_coding	eukaryotic translation initiation factor 4B [Source:HGNC Symbol;Acc:HGNC:3285]	-
ENSG00000269378	31.6403	24.0816	34.1936	24.2899	7.01573	14.2247	101.442	33.2473	20.1536	101.838	33.0303	43.0763	46.7345	20.7934	36.307	65.3595	20.0232	31.9069	AC022149.1	19	14621634	14622242	-	609	processed_pseudogene	integrin beta 1 pseudogene 1	-
ENSG00000165672	21.2205	19.1215	29.8362	30.3832	12.3997	13.9316	61.1621	38.4915	25.2654	65.7613	73.4024	32.5334	68.935	37.3832	51.5464	42.3035	44.0183	21.267	PRDX3	10	119167703	119178833	-	3417	protein_coding	peroxiredoxin 3 [Source:HGNC Symbol;Acc:HGNC:9354]	-
ENSG00000183978	31.6832	19.6023	38.9526	35.3048	20.2847	30.9924	33.1342	33.9094	26.1323	30.7517	84.984	29.7665	51.4164	52.9616	64.2925	28.951	52.6771	22.5968	COA3	17	42795147	42798704	-	1922	protein_coding	cytochrome c oxidase assembly factor 3 [Source:HGNC Symbol;Acc:HGNC:24990]	-
ENSG00000164258	40.8772	24.7696	45.6914	39.4672	14.5326	28.7639	55.6785	36.6286	40.9362	66.8746	44.3228	32.4722	44.0915	26.92	34.9116	55.4846	32.0163	23.6712	NDUFS4	5	53560633	53683340	+	1176	protein_coding	NADH:ubiquinone oxidoreductase subunit S4 [Source:HGNC Symbol;Acc:HGNC:7711]	-
ENSG00000168894	50.4094	34.6952	56.1339	48.5003	37.9882	33.4747	44.1586	43.4909	39.8017	33.8905	34.5374	30.4242	36.8379	23.4449	43.2498	44.9395	26.7999	24.7647	RNF181	2	85595725	85597613	+	1220	protein_coding	ring finger protein 181 [Source:HGNC Symbol;Acc:HGNC:28037]	-
ENSG00000112667	49.1459	27.794	44.3747	51.7333	33.1837	47.1918	47.8078	41.0112	24.3088	39.2521	41.4016	41.2665	54.8182	29.081	28.7845	22.8502	42.0139	21.4901	DNPH1	6	43225629	43229484	-	1250	protein_coding	2'-deoxynucleoside 5'-phosphate N-hydrolase 1 [Source:HGNC Symbol;Acc:HGNC:21218]	-
ENSG00000115649	51.3517	25.3223	46.2125	54.2355	38.7224	61.3692	34.7936	30.8685	36.8492	50.0852	37.3836	25.1946	38.2167	34.9081	33.2284	16.3286	38.4961	32.0456	CNPPD1	2	219171897	219178106	-	2760	protein_coding	cyclin Pas1/PHO80 domain containing 1 [Source:HGNC Symbol;Acc:HGNC:25220]	-
ENSG00000134871	72.2373	57.2082	60.6299	48.7157	40.1422	44.5807	74.7609	53.7561	30.9128	71.2951	10.2818	18.735	17.8504	11.3004	6.35804	14.8365	15.494	36.3022	COL4A2	13	110305812	110513209	+	19293	protein_coding	collagen type IV alpha 2 chain [Source:HGNC Symbol;Acc:HGNC:2203]	-
ENSG00000169223	41.7875	25.6182	40.5197	40.0168	28.8021	42.5992	51.2078	36.6223	31.547	44.2671	43.4404	49.2365	46.1226	32.8741	42.321	21.5267	37.7198	28.738	LMAN2	5	177331562	177351852	-	2357	protein_coding	lectin, mannose binding 2 [Source:HGNC Symbol;Acc:HGNC:16986]	-
ENSG00000181092	2.0085	3.24498	3.56029	24.4181	0.643197	0.482893	327.694	119.568	9.44142	162.621	0.140989	1.01839	2.47342	0	3.11557	0.919355	0.157974	22.9365	ADIPOQ	3	186842690	186858463	+	4613	protein_coding	adiponectin, C1Q and collagen domain containing [Source:HGNC Symbol;Acc:HGNC:13633]	-
ENSG00000107438	57.8734	32.6827	57.464	71.2502	29.7899	34.9321	43.8163	39.4291	52.6351	55.8815	18.3625	40.6964	32.2179	17.2242	29.5364	19.8999	10.1981	40.2369	PDLIM1	10	95237572	95291024	-	2239	protein_coding	PDZ and LIM domain 1 [Source:HGNC Symbol;Acc:HGNC:2067]	-
ENSG00000099341	49.2354	19.8051	48.5029	48.6464	18.5382	44.2408	78.8448	42.0341	34.5202	90.3963	27.4846	22.2754	30.7653	21.3755	27.9341	25.112	20.8567	31.8592	PSMD8	19	38374536	38383824	+	3105	protein_coding	proteasome 26S subunit, non-ATPase 8 [Source:HGNC Symbol;Acc:HGNC:9566]	-
ENSG00000134440	41.4591	28.0127	39.8774	51.1284	30.2584	27.2186	51.138	43.4408	40.3031	47.0995	49.0804	27.6872	40.6931	32.5281	39.1793	33.2019	32.5307	27.291	NARS	18	57600656	57622213	-	4089	protein_coding	asparaginyl-tRNA synthetase [Source:HGNC Symbol;Acc:HGNC:7643]	-
ENSG00000129625	38.3471	23.5999	30.4165	31.265	21.2815	33.7229	29.8588	29.2371	26.1562	28.6346	82.1492	39.7616	52.8685	41.2622	81.8529	31.5637	40.7379	19.0515	REEP5	5	112876379	112922539	-	4230	protein_coding	receptor accessory protein 5 [Source:HGNC Symbol;Acc:HGNC:30077]	-
ENSG00000105677	52.7522	28.0603	55.1111	56.4412	32.1586	33.4796	41.2904	44.7656	38.055	48.1099	34.9382	25.2308	34.8767	30.2283	37.403	36.3122	27.5852	24.9075	TMEM147	19	35545595	35547526	+	1932	protein_coding	transmembrane protein 147 [Source:HGNC Symbol;Acc:HGNC:30414]	-
ENSG00000109501	66.9309	32.1267	52.0059	73.4491	52.5302	65.2457	38.3214	38.1043	68.7426	60.3399	13.1452	7.77109	13.3996	11.3414	25.0871	16.349	8.32131	36.888	WFS1	4	6269849	6303265	+	4513	protein_coding	wolframin ER transmembrane glycoprotein [Source:HGNC Symbol;Acc:HGNC:12762]	-
ENSG00000183617	63.7253	30.7562	54.87	39.374	34.0784	35.2057	60.6989	40.2623	31.4832	37.0251	35.3399	39.5571	37.1608	20.483	37.0754	32.1962	27.8512	22.7134	MRPL54	19	3762664	3768575	+	1003	protein_coding	mitochondrial ribosomal protein L54 [Source:HGNC Symbol;Acc:HGNC:16685]	-
ENSG00000204389	59.541	52.7098	50.8437	32.8211	41.1781	36.849	20.7713	43.6412	32.7776	25.6733	45.0528	29.1855	30.456	32.9	40.6794	43.7291	35.023	24.5566	HSPA1A	6	31815464	31817946	+	2483	protein_coding	heat shock protein family A (Hsp70) member 1A [Source:HGNC Symbol;Acc:HGNC:5232]	-
ENSG00000091483	46.2326	28.5201	42.1563	64.3078	33.0782	38.1702	54.3587	37.0251	47.7033	64.7875	35.4167	16.069	38.2638	25.363	21.0675	34.3742	27.8747	23.5462	FH	1	241497603	241519761	-	2142	protein_coding	fumarate hydratase [Source:HGNC Symbol;Acc:HGNC:3700]	-
ENSG00000103145	57.347	58.8646	68.8092	48.5835	55.1589	47.5559	20.9686	28.6896	33.3451	18.7959	43.1817	22.0069	24.1079	30.9906	48.8846	21.7507	25.9354	22.784	HCFC1R1	16	3022620	3024286	-	1433	protein_coding	host cell factor C1 regulator 1 [Source:HGNC Symbol;Acc:HGNC:21198]	-
ENSG00000110711	47.4887	40.457	49.0516	43.5684	47.1113	43.6663	33.3624	35.2941	37.2378	29.5886	29.7998	42.1455	33.8973	28.9419	53.4696	29.0999	26.2463	26.4452	AIP	11	67483041	67491103	+	1640	protein_coding	aryl hydrocarbon receptor interacting protein [Source:HGNC Symbol;Acc:HGNC:358]	-
ENSG00000185222	43.9772	40.4775	53.028	36.8498	32.256	19.8526	40.4403	46.7112	37.2151	39.8949	39.2311	23.7514	32.4969	24.8524	41.215	76.049	23.4789	24.1616	TCEAL9	X	103356489	103358462	+	1974	protein_coding	transcription elongation factor A like 9 [Source:HGNC Symbol;Acc:HGNC:30084]	-
ENSG00000162191	41.4184	37.1296	47.0694	49.8467	39.2094	37.146	41.0264	42.4866	36.3789	34.4711	30.6771	40.102	32.4452	27.8041	47.6126	32.8331	29.0879	29.0131	UBXN1	11	62676498	62679117	-	2532	protein_coding	UBX domain protein 1 [Source:HGNC Symbol;Acc:HGNC:18402]	-
ENSG00000188536	61.2127	57.9093	10.4167	32.0818	22.1723	189.448	37.1473	24.4832	13.112	61.3523	13.3694	10.2925	88.8356	9.04809	10.6945	17.8559	5.52204	10.0908	HBA2	16	172876	173710	+	827	protein_coding	hemoglobin subunit alpha 2 [Source:HGNC Symbol;Acc:HGNC:4824]	-
ENSG00000100219	38.0485	28.2585	40.2393	34.3761	41.9387	24.7946	63.7616	35.3789	32.5646	69.8956	28.1682	40.5992	38.2465	33.0175	27.5491	48.835	19.4939	29.8531	XBP1	22	28794555	28800597	-	3028	protein_coding	X-box binding protein 1 [Source:HGNC Symbol;Acc:HGNC:12801]	TF_bZIP
ENSG00000175602	46.1692	44.6647	57.5026	44.3022	34.8494	59.1165	66.3227	37.3549	38.6256	32.9741	22.3135	31.6802	20.6719	26.1186	34.6556	30.3426	12.8469	33.5742	CCDC85B	11	65890112	65891635	+	1524	protein_coding	coiled-coil domain containing 85B [Source:HGNC Symbol;Acc:HGNC:24926]	-
ENSG00000106483	25.8428	52.3103	72.7692	113.846	72.3747	87.1477	72.6166	30.5635	13.2346	23.9798	1.14658	7.46842	11.4612	0.687604	2.71747	54.6528	1.2799	29.8653	SFRP4	7	37905932	38025695	-	3606	protein_coding	secreted frizzled related protein 4 [Source:HGNC Symbol;Acc:HGNC:10778]	-
ENSG00000118705	31.7714	23.9312	32.6918	34.9028	23.345	25.3451	54.3496	36.2311	28.6172	53.8047	45.2365	46.7442	51.1109	36.8633	45.1895	33.8768	39.5689	29.7543	RPN2	20	37178410	37241623	+	2819	protein_coding	ribophorin II [Source:HGNC Symbol;Acc:HGNC:10382]	-
ENSG00000197448	44.0025	28.7544	34.1688	51.2931	29.8391	58.6381	49.9473	38.2186	40.951	47.7086	32.194	26.3589	34.1229	31.532	29.6426	28.4123	33.2423	33.3092	GSTK1	7	143244093	143270854	+	4228	protein_coding	glutathione S-transferase kappa 1 [Source:HGNC Symbol;Acc:HGNC:16906]	-
ENSG00000137076	54.0591	37.0903	53.3401	51.9223	38.6991	46.5739	49.9231	38.6368	46.2641	75.7103	18.9586	25.8048	30.5869	19.9193	18.6177	8.36728	18.9054	38.5936	TLN1	9	35696948	35732395	-	10076	protein_coding	talin 1 [Source:HGNC Symbol;Acc:HGNC:11845]	-
ENSG00000115053	36.5782	32.2667	44.4627	38.7706	27.1571	28.0289	48.0501	40.9264	36.7681	51.8971	36.3254	40.2434	40.2066	29.1706	35.2179	40.2192	33.3394	32.1312	NCL	2	231453531	231483641	-	6929	protein_coding	nucleolin [Source:HGNC Symbol;Acc:HGNC:7667]	-
ENSG00000131116	69.001	49.1689	63.179	67.0655	69.3468	56.8325	29.7245	50.7681	40.4803	28.9793	15.9749	20.9735	23.3092	14.9063	17.1409	19.6393	14.0654	20.2706	ZNF428	19	43607219	43619874	-	1803	protein_coding	zinc finger protein 428 [Source:HGNC Symbol;Acc:HGNC:20804]	-
ENSG00000183011	59.6063	32.8726	42.6144	50.7086	39.9783	40.6784	38.6042	35.1594	30.6335	32.0306	43.3717	31.2163	32.3303	26.7529	50.097	35.6332	26.979	21.5061	NAA38	17	7856685	7885238	-	1943	protein_coding	N(alpha)-acetyltransferase 38, NatC auxiliary subunit [Source:HGNC Symbol;Acc:HGNC:28212]	-
ENSG00000183291	28.4907	24.5159	31.8468	31.6928	18.0639	18.3299	49.4121	37.9438	25.3102	44.5599	54.8987	56.2765	45.9068	36.5721	57.1017	53.4409	33.97	20.9501	SELENOF	1	86862445	86914424	-	2201	protein_coding	selenoprotein F [Source:HGNC Symbol;Acc:HGNC:17705]	-
ENSG00000157110	53.3369	51.1092	50.3454	52.9186	62.3247	65.8381	25.1582	48.8089	63.0361	45.1652	11.8806	10.3172	17.24	16.4495	16.4638	24.401	17.7879	35.5616	RBPMS	8	30384479	30572261	+	8931	protein_coding	RNA binding protein, mRNA processing factor [Source:HGNC Symbol;Acc:HGNC:19097]	-
ENSG00000113889	0.100529	0.0108174	0.0530275	0.101602	0.253867	0.0352955	0.155888	0.0119973	0.0509779	0.0923671	222.79	8.83502	152.715	59.3356	37.665	0.612061	180.497	4.50822	KNG1	3	186717276	186744410	+	4675	protein_coding	kininogen 1 [Source:HGNC Symbol;Acc:HGNC:6383]	-
ENSG00000109919	52.0751	28.5587	48.0062	66.146	30.3159	36.9655	61.6329	41.664	39.9602	73.9319	24.9038	16.3446	29.0575	16.6898	21.2145	31.9594	20.0232	28.2803	MTCH2	11	47617315	47642623	-	2897	protein_coding	mitochondrial carrier 2 [Source:HGNC Symbol;Acc:HGNC:17587]	-
ENSG00000126254	55.9087	37.5961	54.8961	52.1992	46.268	48.0209	39.7959	43.9599	41.0527	34.0843	29.0192	26.3772	27.9012	27.678	37.5183	11.697	25.3042	27.4468	RBM42	19	35629030	35637686	+	2206	protein_coding	RNA binding motif protein 42 [Source:HGNC Symbol;Acc:HGNC:28117]	-
ENSG00000136003	34.8627	25.2344	41.2568	49.6193	21.7367	34.8301	51.3619	43.4777	36.7093	44.0912	41.5687	30.2089	44.3818	21.4152	43.0749	41.9912	30.8413	29.791	ISCU	12	108562582	108569384	+	4439	protein_coding	iron-sulfur cluster assembly enzyme [Source:HGNC Symbol;Acc:HGNC:29882]	-
ENSG00000166295	35.0446	32.0924	45.7366	43.8615	34.1721	29.6508	34.266	31.7795	38.4848	39.5465	48.8734	34.304	40.3726	31.7842	50.4963	38.0149	33.3806	22.1874	ANAPC16	10	72216000	72235860	+	4324	protein_coding	anaphase promoting complex subunit 16 [Source:HGNC Symbol;Acc:HGNC:26976]	-
ENSG00000110108	30.6716	20.8468	38.9877	31.6436	16.2509	48.5954	52.6096	29.3759	26.8247	65.6375	42.5223	43.9964	41.6567	32.7915	51.1655	21.4853	33.1908	34.4445	TMEM109	11	60913874	60923443	+	2421	protein_coding	transmembrane protein 109 [Source:HGNC Symbol;Acc:HGNC:28771]	-
ENSG00000111676	44.5385	44.6667	41.3606	49.8731	54.9799	45.8082	40.3202	51.9181	47.832	43.0161	22.6232	17.4644	24.5194	30.116	20.8311	9.56042	26.9334	45.7808	ATN1	12	6924463	6942321	+	4762	protein_coding	atrophin 1 [Source:HGNC Symbol;Acc:HGNC:3033]	-
ENSG00000142910	54.3622	28.5463	19.4342	34.5897	8.76468	41.5406	31.0712	29.0899	15.8964	61.8472	52.7193	33.7069	39.4061	41.6106	93.558	11.0591	32.244	32.4693	TINAGL1	1	31576485	31587686	+	5281	protein_coding	tubulointerstitial nephritis antigen like 1 [Source:HGNC Symbol;Acc:HGNC:19168]	-
ENSG00000100100	66.6627	28.7346	60.624	52.3052	35.8232	83.6307	35.2713	32.8566	36.907	57.9349	15.0051	29.876	17.2923	13.9405	16.0332	30.6577	14.3512	31.7132	PIK3IP1	22	31281593	31292534	-	3805	protein_coding	phosphoinositide-3-kinase interacting protein 1 [Source:HGNC Symbol;Acc:HGNC:24942]	-
ENSG00000071967	48.694	34.5089	53.8098	40.0764	39.817	33.8716	57.0996	64.3555	39.9543	57.3871	11.255	28.8551	22.6684	7.3652	21.1358	58.2631	14.5672	25.4785	CYBRD1	2	171522247	171558133	+	5176	protein_coding	cytochrome b reductase 1 [Source:HGNC Symbol;Acc:HGNC:20797]	-
ENSG00000078808	43.6711	27.1597	38.7201	50.2615	30.8993	56.1001	46.9169	42.2711	35.6926	39.2247	33.6804	32.3192	33.7066	30.9533	34.7145	12.6845	33.1997	36.9566	SDF4	1	1216908	1232031	-	4709	protein_coding	stromal cell derived factor 4 [Source:HGNC Symbol;Acc:HGNC:24188]	-
ENSG00000196923	43.6321	104.872	62.9462	41.5419	79.5258	58.4093	15.6209	22.6921	55.4975	28.4399	5.28125	14.7339	13.5924	7.89688	5.37073	40.2439	6.20644	51.6801	PDLIM7	5	177483394	177497606	-	4407	protein_coding	PDZ and LIM domain 7 [Source:HGNC Symbol;Acc:HGNC:22958]	-
ENSG00000105669	53.7811	39.6507	64.6611	60.6116	48.2547	59.6826	36.026	48.6028	37.1113	33.3965	20.096	20.5883	24.7401	16.7745	27.3818	23.2899	16.267	27.1523	COPE	19	18899514	18919397	-	2885	protein_coding	coatomer protein complex subunit epsilon [Source:HGNC Symbol;Acc:HGNC:2234]	-
ENSG00000210077	23.3527	11.7267	12.5748	30.486	47.3011	21.5226	12.1869	17.883	44.9012	3.1291	47.8026	12.1339	116.671	18.6091	23.3054	11.1079	131.665	71.5067	MT-TV	MT	1602	1670	+	69	Mt_tRNA	mitochondrially encoded tRNA valine [Source:HGNC Symbol;Acc:HGNC:7500]	-
ENSG00000135218	2.62262	6.51198	4.39186	33.6036	4.03609	1.81992	295.205	142.425	9.12873	113.768	4.38087	1.58607	2.64506	1.73363	4.90975	3.90266	1.44228	23.6318	CD36	7	80369575	80679277	+	10880	protein_coding	CD36 molecule [Source:HGNC Symbol;Acc:HGNC:1663]	-
ENSG00000159352	54.6074	38.0412	50.0598	56.4233	44.6972	41.2107	43.1885	42.024	39.5431	38.0353	26.2437	26.4604	27.2023	18.1963	30.397	32.9163	21.1053	27.3475	PSMD4	1	151254703	151267479	+	3027	protein_coding	proteasome 26S subunit, non-ATPase 4 [Source:HGNC Symbol;Acc:HGNC:9561]	-
ENSG00000102317	42.5401	46.2881	45.9462	44.4128	38.1083	31.4003	45.4068	48.8568	37.2078	37.441	24.4171	43.2719	27.2683	25.4197	22.6007	45.0704	19.8964	31.8198	RBM3	X	48574449	48579066	+	3731	protein_coding	RNA binding motif protein 3 [Source:HGNC Symbol;Acc:HGNC:9900]	-
ENSG00000071859	58.325	49.5075	55.7469	50.0923	62.6471	56.9519	30.5959	54.5363	44.4242	29.6064	15.1837	17.5761	19.7548	17.1277	23.8243	24.8216	17.563	27.7395	FAM50A	X	154444126	154450654	+	2567	protein_coding	family with sequence similarity 50 member A [Source:HGNC Symbol;Acc:HGNC:18786]	-
ENSG00000178988	44.934	39.5523	47.5907	47.3435	50.7668	36.7101	32.8901	37.8463	38.5906	35.3574	32.1356	33.434	30.7055	21.2041	35.1996	41.8614	28.1911	21.4034	MRFAP1L1	4	6707701	6709880	-	2180	protein_coding	Morf4 family associated protein 1 like 1 [Source:HGNC Symbol;Acc:HGNC:28796]	-
ENSG00000196531	38.923	43.3656	55.2259	45.8068	47.7257	29.9989	37.3788	50.9821	37.7378	29.1513	22.1836	37.4085	28.4893	16.0862	29.3288	63.9264	19.9271	22.0147	NACA	12	56712428	56731628	-	10008	protein_coding	nascent polypeptide associated complex subunit alpha [Source:HGNC Symbol;Acc:HGNC:7629]	-
ENSG00000184557	110.482	30.4649	9.13544	5.5347	27.0661	10.1696	103.528	18.4223	13.119	4.9752	19.7447	13.4232	38.6033	101.509	18.8216	14.1664	8.70713	107.055	SOCS3	17	78356778	78360077	-	2734	protein_coding	suppressor of cytokine signaling 3 [Source:HGNC Symbol;Acc:HGNC:19391]	-
ENSG00000128245	52.7972	32.0787	44.6439	37.5655	26.6347	39.1495	39.0568	28.261	32.7899	40.4002	34.8846	46.7218	36.3068	34.638	49.4123	28.3289	19.5676	31.2388	YWHAH	22	31944461	31957603	+	2453	protein_coding	tyrosine 3-monooxygenase/tryptophan 5-monooxygenase activation protein eta [Source:HGNC Symbol;Acc:HGNC:12853]	-
ENSG00000138279	36.6427	27.141	47.7487	40.8747	27.0996	24.9355	43.4062	36.6666	35.1612	52.8643	44.9464	33.5116	39.4903	30.8638	46.442	33.7071	27.8898	25.0506	ANXA7	10	73375101	73414076	-	2862	protein_coding	annexin A7 [Source:HGNC Symbol;Acc:HGNC:545]	-
ENSG00000103202	45.8083	35.331	60.3547	92.1878	39.0974	53.998	47.0169	65.1808	33.0046	29.2388	19.3292	12.5218	15.5794	17.4694	18.9096	25.1583	14.3761	29.6267	NME4	16	396725	410367	+	3670	protein_coding	NME/NM23 nucleoside diphosphate kinase 4 [Source:HGNC Symbol;Acc:HGNC:7852]	-
ENSG00000163331	83.9619	20.4957	72.3598	91.5158	31.7532	135.866	19.5046	58.5427	50.2724	40.7781	0.455795	2.28178	6.02787	0.167082	0.79645	19.1273	0.733317	18.5727	DAPL1	2	158795317	158862781	+	1325	protein_coding	death associated protein like 1 [Source:HGNC Symbol;Acc:HGNC:21490]	-
ENSG00000244038	36.6169	26.0384	43.7544	36.0352	25.1018	32.0492	46.0881	35.4335	28.8377	43.7013	39.8146	44.5132	40.4418	35.2619	51.1756	24.9754	31.0312	30.7364	DDOST	1	20651767	20661544	-	2721	protein_coding	dolichyl-diphosphooligosaccharide--protein glycosyltransferase non-catalytic subunit [Source:HGNC Symbol;Acc:HGNC:2728]	-
ENSG00000211679	1.8892	17.076	4.2927	19.2405	17.0831	39.2872	100.471	4.61326	9.1563	9.814	1.80997	311.497	35.8103	6.32525	8.59291	32.737	5.67844	25.8419	IGLC3	22	22906342	22906803	+	462	IG_C_gene	immunoglobulin lambda constant 3 (Kern-Oz+ marker) [Source:HGNC Symbol;Acc:HGNC:5857]	-
ENSG00000131669	66.2517	18.5441	45.2649	58.6564	33.3459	80.9454	38.6152	54.2872	35.9103	36.834	33.5087	14.0875	28.3189	18.9113	32.1098	14.8966	18.2734	21.7382	NINJ1	9	93121489	93134288	-	2648	protein_coding	ninjurin 1 [Source:HGNC Symbol;Acc:HGNC:7824]	-
ENSG00000072110	64.5992	44.5842	66.8693	62.6706	47.4351	35.7157	45.2815	44.3591	53.2949	69.3279	6.26933	11.2365	13.6786	8.33367	9.41579	21.5089	3.92736	41.4915	ACTN1	14	68874143	68979440	-	10626	protein_coding	actinin alpha 1 [Source:HGNC Symbol;Acc:HGNC:163]	-
ENSG00000189403	32.1221	39.5049	42.1144	35.1097	32.6712	24.2179	41.4478	40.4879	33.2888	39.859	34.8044	40.346	34.0703	27.496	37.9608	60.1669	26.4771	26.438	HMGB1	13	30456704	30617597	-	7723	protein_coding	high mobility group box 1 [Source:HGNC Symbol;Acc:HGNC:4983]	HMG
ENSG00000151726	16.9664	17.7853	16.8944	35.9364	15.0053	13.2735	91.2712	60.7556	25.2866	101.057	62.5278	12.028	29.0008	23.4912	24.7263	13.3351	54.1177	34.2951	ACSL1	4	184755595	184826818	-	6284	protein_coding	acyl-CoA synthetase long chain family member 1 [Source:HGNC Symbol;Acc:HGNC:3569]	-
ENSG00000182718	46.375	26.9878	29.8361	39.2109	16.7116	26.2825	58.8298	43.998	28.6559	43.6881	33.4784	60.7297	31.0045	27.7984	49.4777	34.6162	19.1048	28.2337	ANXA2	15	60347134	60402883	-	8824	protein_coding	annexin A2 [Source:HGNC Symbol;Acc:HGNC:537]	-
ENSG00000112697	38.5955	31.2134	28.393	53.5509	22.0431	28.1667	47.995	47.7779	26.4117	50.9847	46.3291	34.5739	40.4359	24.0527	43.8959	32.0062	25.1493	22.8647	TMEM30A	6	75252924	75284968	-	5123	protein_coding	transmembrane protein 30A [Source:HGNC Symbol;Acc:HGNC:16667]	-
ENSG00000133639	37.6638	29.203	33.7458	22.6046	27.3357	15.1953	35.1673	28.5175	21.3945	24.9202	56.2659	82.112	36.6957	37.0615	64.2802	35.6221	29.1453	26.9679	BTG1	12	92140278	92145897	-	4854	protein_coding	BTG anti-proliferation factor 1 [Source:HGNC Symbol;Acc:HGNC:1130]	-
ENSG00000143314	55.8107	29.7461	50.4217	66.1745	38.0905	46.6788	49.842	43.1494	39.1227	37.0356	25.5714	20.9652	26.7764	20.9237	23.0063	25.3522	20.8947	22.4965	MRPL24	1	156737303	156741590	-	1695	protein_coding	mitochondrial ribosomal protein L24 [Source:HGNC Symbol;Acc:HGNC:14037]	-
ENSG00000223865	55.5684	23.1023	21.6505	30.6822	27.0023	43.5425	71.9277	36.8156	24.5708	25.2383	10.0868	72.4113	26.073	30.2687	14.4401	37.6768	12.1325	78.4603	HLA-DPB1	6	33075926	33087201	+	2791	protein_coding	major histocompatibility complex, class II, DP beta 1 [Source:HGNC Symbol;Acc:HGNC:4940]	-
ENSG00000096060	33.5443	42.1301	52.9489	29.5481	10.5026	51.5063	42.4405	47.7441	78.254	111.702	1.3463	7.06363	31.2647	13.1314	7.71183	39.2548	2.28558	37.9819	FKBP5	6	35573585	35728583	-	10628	protein_coding	FK506 binding protein 5 [Source:HGNC Symbol;Acc:HGNC:3721]	-
ENSG00000007520	31.22	20.139	41.284	37.2852	21.0535	37.6342	60.3895	31.8115	31.5877	50.5465	42.8681	39.104	39.879	28.4967	45.6838	21.5402	30.1734	26.5607	TSR3	16	1349240	1351911	-	1243	protein_coding	TSR3, acp transferase ribosome maturation factor [Source:HGNC Symbol;Acc:HGNC:14175]	-
ENSG00000181524	34.4467	29.4299	59.7677	45.291	29.1773	22.5365	37.8171	37.5694	32.8329	30.1297	30.0143	41.3205	36.7381	25.4513	41.8967	55.8296	24.8104	20.4008	RPL24P4	6	42956345	42956765	-	421	processed_pseudogene	ribosomal protein L24 pseudogene 4 [Source:HGNC Symbol;Acc:HGNC:21371]	-
ENSG00000164713	41.7546	28.7348	54.6676	49.7662	27.1476	46.1883	75.2155	58.1067	33.877	51.3827	16.1543	15.4682	24.1638	11.0627	25.4732	29.2717	17.3947	27.6059	BRI3	7	98252379	98310441	+	5139	protein_coding	brain protein I3 [Source:HGNC Symbol;Acc:HGNC:1109]	-
ENSG00000174705	43.915	58.7381	74.1274	38.3573	58.8734	76.1568	24.2005	40.4971	71.5804	64.259	0.642561	1.21898	7.39094	1.51493	0.804816	27.7737	0.972588	42.2815	SH3PXD2B	5	172325000	172454523	-	8242	protein_coding	SH3 and PX domains 2B [Source:HGNC Symbol;Acc:HGNC:29242]	-
ENSG00000167797	44.3604	27.0766	42.4223	65.1336	39.796	36.7771	31.1536	40.6975	36.3562	26.9217	32.8574	27.8065	27.44	52.7637	41.9391	8.17438	22.306	28.8425	CDK2AP2	11	67506497	67508649	-	2019	protein_coding	cyclin dependent kinase 2 associated protein 2 [Source:HGNC Symbol;Acc:HGNC:30833]	-
ENSG00000105223	34.6704	30.4364	44.4017	48.5751	41.4497	51.7236	51.0854	46.8478	35.4563	37.4007	24.4736	28.6849	30.2513	23.411	30.4286	11.2364	26.2404	35.6501	PLD3	19	40348456	40380439	+	5184	protein_coding	phospholipase D family member 3 [Source:HGNC Symbol;Acc:HGNC:17158]	-
ENSG00000138071	38.2726	32.0273	35.6999	38.3065	28.7492	18.2391	56.8594	38.0885	27.0147	46.0549	35.3416	53.6394	36.6448	24.2723	35.6517	40.7876	20.4298	24.8305	ACTR2	2	65227753	65271253	+	4347	protein_coding	ARP2 actin related protein 2 homolog [Source:HGNC Symbol;Acc:HGNC:169]	-
ENSG00000163468	39.3511	30.9243	46.9832	36.9171	25.7865	37.7609	38.5638	32.6782	31.8365	46.8571	38.0389	35.5737	37.3893	30.7888	39.3838	30.1897	28.5714	22.3004	CCT3	1	156308968	156367873	-	4018	protein_coding	chaperonin containing TCP1 subunit 3 [Source:HGNC Symbol;Acc:HGNC:1616]	-
ENSG00000004779	30.0448	21.5244	41.1365	41.8162	16.4672	24.8541	67.6222	32.1452	32.732	64.1314	37.8036	21.0472	39.5781	26.7321	32.6953	41.1644	32.7019	24.9363	NDUFAB1	16	23581002	23596356	-	1600	protein_coding	NADH:ubiquinone oxidoreductase subunit AB1 [Source:HGNC Symbol;Acc:HGNC:7694]	-
ENSG00000133318	36.6646	19.1214	31.1377	50.1538	22.8165	19.9136	78.205	53.3859	33.2774	54.0982	40.7533	17.0891	24.3506	28.5215	50.1481	16.8939	23.5614	26.5338	RTN3	11	63681446	63759891	+	5792	protein_coding	reticulon 3 [Source:HGNC Symbol;Acc:HGNC:10469]	-
ENSG00000168264	41.9549	40.2836	35.3305	38.2084	53.6886	44.3079	31.1509	38.017	43.3358	29.3766	29.6496	30.1883	31.9223	31.2862	19.2435	29.442	26.3994	32.3133	IRF2BP2	1	234604269	234609525	-	4724	protein_coding	interferon regulatory factor 2 binding protein 2 [Source:HGNC Symbol;Acc:HGNC:21729]	-
ENSG00000067167	26.6444	25.6508	35.1271	25.844	26.5032	20.6152	38.3369	31.9199	22.769	37.6503	51.2358	59.5028	45.0485	33.179	48.3473	47.1961	30.6927	19.1473	TRAM1	8	70573442	70608387	-	3878	protein_coding	translocation associated membrane protein 1 [Source:HGNC Symbol;Acc:HGNC:20568]	-
ENSG00000156804	55.972	53.7923	55.8663	49.2563	82.5082	69.171	11.1362	23.9671	63.5766	54.6631	1.94745	2.46561	10.929	2.78414	2.30365	61.9511	1.60955	21.4246	FBXO32	8	123497889	123541206	-	7395	protein_coding	F-box protein 32 [Source:HGNC Symbol;Acc:HGNC:16731]	-
ENSG00000069275	34.8619	33.9537	35.9964	35.0267	35.273	35.8446	31.25	31.1284	31.2647	43.1503	45.5334	36.2385	37.9981	27.6442	38.2073	38.6071	31.7647	20.5835	NUCKS1	1	205712819	205750276	-	6546	protein_coding	nuclear casein kinase and cyclin dependent kinase substrate 1 [Source:HGNC Symbol;Acc:HGNC:29923]	-
ENSG00000164096	26.8087	21.2695	41.3041	20.3697	14.9296	34.0182	54.4927	24.3379	18.6615	67.4884	39.1659	38.8447	41.1984	25.4155	41.5842	61.3706	29.4919	23.2004	C4orf3	4	119296419	119304445	-	3148	protein_coding	chromosome 4 open reading frame 3 [Source:HGNC Symbol;Acc:HGNC:19225]	-
ENSG00000170275	38.2177	33.4473	54.9776	42.3858	34.3551	34.0734	48.1637	40.2876	35.1253	61.3863	18.1938	28.561	28.3661	13.7096	26.3833	42.9071	16.0586	27.2767	CRTAP	3	33113979	33147773	+	6695	protein_coding	cartilage associated protein [Source:HGNC Symbol;Acc:HGNC:2379]	-
ENSG00000117410	33.769	21.9309	36.6596	30.3288	26.6071	40.353	33.6676	30.7966	22.1636	29.3018	56.8117	31.329	57.7757	37.8764	48.6174	25.8878	36.8043	22.6421	ATP6V0B	1	43974487	43978295	+	3535	protein_coding	ATPase H+ transporting V0 subunit b [Source:HGNC Symbol;Acc:HGNC:861]	-
ENSG00000013441	36.1019	57.1152	25.8812	28.8355	70.1307	36.5599	13.9553	37.8618	47.7681	12.0587	16.8032	39.6127	24.2886	25.8295	18.9831	60.2678	39.0913	31.1753	CLK1	2	200853009	200864744	-	5170	protein_coding	CDC like kinase 1 [Source:HGNC Symbol;Acc:HGNC:2068]	-
ENSG00000146674	11.9414	18.4429	16.9481	11.2376	17.9024	9.00658	18.1511	123.194	14.6637	17.1815	57.2087	38.0775	48.453	37.4866	105.32	23.0386	36.9867	16.5242	IGFBP3	7	45912245	45921874	-	4571	protein_coding	insulin like growth factor binding protein 3 [Source:HGNC Symbol;Acc:HGNC:5472]	-
ENSG00000152082	66.0664	40.0391	52.2783	43.667	54.1102	43.8653	31.1958	46.8478	25.1452	21.8882	25.0581	29.9068	24.1679	17.5643	31.3972	33.4166	17.9875	16.6798	MZT2B	2	130181737	130190729	+	1815	protein_coding	mitotic spindle organizing protein 2B [Source:HGNC Symbol;Acc:HGNC:25886]	-
ENSG00000184840	36.8715	20.9125	31.4959	33.483	17.4862	39.9329	44.0897	29.5609	21.6101	38.0936	46.0181	46.2082	43.8782	35.1674	51.2614	23.8519	32.9722	27.361	TMED9	5	177592158	177596124	+	2440	protein_coding	transmembrane p24 trafficking protein 9 [Source:HGNC Symbol;Acc:HGNC:24878]	-
ENSG00000101367	37.8826	23.7722	43.1917	33.9409	21.9448	25.9493	46.3995	33.8279	31.5279	62.6405	38.3089	33.2136	39.7778	25.928	34.1401	43.46	21.1517	22.7118	MAPRE1	20	32819893	32850405	+	2623	protein_coding	microtubule associated protein RP/EB family member 1 [Source:HGNC Symbol;Acc:HGNC:6890]	-
ENSG00000136859	45.8528	30.1425	46.4062	54.5604	40.7867	54.3091	71.1379	42.0549	49.4997	66.3991	10.0103	4.65252	7.7585	7.20679	18.9043	29.0758	3.42287	37.5284	ANGPTL2	9	127087332	127122883	-	3889	protein_coding	angiopoietin like 2 [Source:HGNC Symbol;Acc:HGNC:490]	-
ENSG00000165283	35.3912	24.7536	45.5039	43.4338	22.0805	29.3741	50.3793	32.8575	35.4645	57.9521	35.2922	25.9351	35.7656	25.7913	33.0006	31.7159	29.0794	25.7683	STOML2	9	35099776	35103195	-	1806	protein_coding	stomatin like 2 [Source:HGNC Symbol;Acc:HGNC:14559]	-
ENSG00000198736	45.4442	30.5022	49.4485	75.2171	41.1015	48.5763	41.7655	53.4353	33.6435	43.8172	12.8362	11.3857	28.1236	9.91455	13.3027	23.4043	22.2303	34.9325	MSRB1	16	1938210	1943326	-	2157	protein_coding	methionine sulfoxide reductase B1 [Source:HGNC Symbol;Acc:HGNC:14133]	-
ENSG00000174307	63.8228	36.2766	46.4523	73.543	37.0836	60.7337	72.7277	49.6352	28.8219	49.2639	8.37925	15.6823	12.7665	6.64575	16.0301	13.9546	5.26385	21.4302	PHLDA3	1	201464383	201469237	-	3138	protein_coding	pleckstrin homology like domain family A member 3 [Source:HGNC Symbol;Acc:HGNC:8934]	-
ENSG00000003989	34.6015	50.0275	54.9825	43.9926	39.2231	50.4517	12.0488	19.15	84.9954	122.348	2.32133	5.79576	20.4559	1.89317	1.95796	47.9613	2.34153	23.5253	SLC7A2	8	17497088	17570573	+	7905	protein_coding	solute carrier family 7 member 2 [Source:HGNC Symbol;Acc:HGNC:11060]	-
ENSG00000079246	37.533	28.3081	38.3223	38.5672	29.5675	28.6941	38.0197	38.3363	33.2202	49.847	36.3706	37.7606	32.1177	23.9417	36.0127	43.2302	23.7442	23.616	XRCC5	2	216107464	216206303	+	5463	protein_coding	X-ray repair cross complementing 5 [Source:HGNC Symbol;Acc:HGNC:12833]	-
ENSG00000107874	45.5995	30.2998	52.8902	50.6997	26.2665	40.1999	42.7595	36.1868	30.9717	45.2612	33.4273	26.7154	27.8334	24.6156	30.073	21.3142	23.2589	28.6878	CUEDC2	10	102423245	102432661	-	1412	protein_coding	CUE domain containing 2 [Source:HGNC Symbol;Acc:HGNC:28352]	-
ENSG00000171345	0.201188	0.346379	0.238777	0.377623	2.81973	0.282545	3.38375	7.3711	0.255053	0.13864	123.379	47.7676	42.7111	84.5353	206.86	4.61528	52.2425	39.5309	KRT19	17	41523617	41528308	-	2336	protein_coding	keratin 19 [Source:HGNC Symbol;Acc:HGNC:6436]	-
ENSG00000073921	37.2471	27.7696	34.3295	33.6895	25.0164	36.8032	38.9238	36.7891	33.0435	41.5122	35.8236	35.5647	39.1436	32.3441	42.1023	26.7526	30.3587	29.6994	PICALM	11	85957684	86069882	-	5833	protein_coding	phosphatidylinositol binding clathrin assembly protein [Source:HGNC Symbol;Acc:HGNC:15514]	-
ENSG00000131828	35.0564	20.699	27.3808	61.2862	19.8509	32.612	58.9795	40.4585	37.7135	59.0467	38.7943	13.3442	30.629	36.807	27.3574	15.6598	30.4707	30.6531	PDHA1	X	19343893	19361705	+	4493	protein_coding	pyruvate dehydrogenase E1 alpha 1 subunit [Source:HGNC Symbol;Acc:HGNC:8806]	-
ENSG00000013306	40.6719	27.0211	39.46	45.2437	31.1517	52.8105	28.3479	25.5305	30.9392	35.1784	43.597	26.8843	41.5098	35.763	37.5395	16.578	32.7923	25.153	SLC25A39	17	44319625	44324870	-	3526	protein_coding	solute carrier family 25 member 39 [Source:HGNC Symbol;Acc:HGNC:24279]	-
ENSG00000204370	25.4315	20.5457	36.7531	41.5312	15.6195	8.72127	64.6722	46.4037	25.2975	49.4124	51.6778	23.4205	45.0731	30.2979	39.9999	36.6568	33.5864	18.7375	SDHD	11	112086773	112120013	+	2838	protein_coding	succinate dehydrogenase complex subunit D [Source:HGNC Symbol;Acc:HGNC:10683]	-
ENSG00000198931	43.0837	29.8996	48.4326	46.7426	31.8923	47.4519	47.1363	42.0579	35.5235	35.4458	26.1267	32.6598	20.7075	22.519	30.8816	22.8133	25.3554	24.3923	APRT	16	88809339	88811944	-	1803	protein_coding	adenine phosphoribosyltransferase [Source:HGNC Symbol;Acc:HGNC:626]	-
ENSG00000108528	39.4433	20.9372	39.7073	51.3305	19.2765	57.032	44.4446	29.5043	35.2929	52.6625	35.0204	17.6886	31.3498	31.0717	37.9198	16.847	26.9032	24.3972	SLC25A11	17	4937130	4940251	-	2669	protein_coding	solute carrier family 25 member 11 [Source:HGNC Symbol;Acc:HGNC:10981]	-
ENSG00000183172	42.1995	27.842	51.8793	47.6285	33.2188	37.0335	29.8273	35.804	38.1026	32.9911	33.3055	25.0166	35.3012	26.7553	43.459	29.5774	24.8665	15.6945	SMDT1	22	42079691	42084284	+	1731	protein_coding	single-pass membrane protein with aspartate rich tail 1 [Source:HGNC Symbol;Acc:HGNC:25055]	-
ENSG00000197858	37.9455	27.189	42.0442	42.8563	27.0196	47.6893	45.3385	34.2567	42.8439	55.48	25.9147	25.7616	31.9269	24.9023	22.5428	17.1207	27.4576	32.0782	GPAA1	8	144082590	144086216	+	3268	protein_coding	glycosylphosphatidylinositol anchor attachment 1 [Source:HGNC Symbol;Acc:HGNC:4446]	-
ENSG00000173726	28.6791	27.3416	32.3877	29.7516	26.32	23.3161	37.1147	29.6115	23.2132	40.018	44.0821	39.3694	49.4114	27.5886	51.5007	40.0605	37.5408	22.4426	TOMM20	1	235109336	235128936	-	3542	protein_coding	translocase of outer mitochondrial membrane 20 [Source:HGNC Symbol;Acc:HGNC:20947]	-
ENSG00000165264	41.5508	27.1438	47.6875	49.963	23.8135	35.1292	49.7188	32.8929	32.9238	40.5216	37.62	19.3358	31.5571	22.3936	30.3396	42.482	26.1812	18.2125	NDUFB6	9	32552999	32573184	-	1388	protein_coding	NADH:ubiquinone oxidoreductase subunit B6 [Source:HGNC Symbol;Acc:HGNC:7701]	-
ENSG00000172889	24.9306	33.8529	20.1974	34.3931	44.4886	38.0685	73.5826	57.208	21.4004	19.3877	25.2751	24.7414	34.9343	33.5241	20.9827	16.6518	32.6546	52.6816	EGFL7	9	136658856	136672678	+	2553	protein_coding	EGF like domain multiple 7 [Source:HGNC Symbol;Acc:HGNC:20594]	-
ENSG00000179918	40.3993	18.1589	30.1498	36.3086	20.0053	21.3131	50.2143	28.5165	23.0754	46.3386	56.6905	21.88	51.0635	29.6972	37.9009	21.2317	56.3333	17.8608	SEPHS2	16	30443631	30446181	-	2551	protein_coding	selenophosphate synthetase 2 [Source:HGNC Symbol;Acc:HGNC:19686]	-
ENSG00000180139	83.4652	83.3958	34.0546	18.4189	45.1539	61.4044	1.46182	6.11448	98.3461	10.2765	0.350281	3.18563	4.67994	2.85163	0.236815	92.7854	0.35105	59.3056	ACTA2-AS1	10	88932390	88940820	+	3183	antisense	ACTA2 antisense RNA 1 [Source:HGNC Symbol;Acc:HGNC:45169]	-
ENSG00000137331	22.9244	25.7705	25.3205	7.35606	20.043	8.94393	36.1743	10.1338	8.83161	9.39423	45.0171	35.9825	77.833	147.491	35.095	18.6524	28.268	42.181	IER3	6	30743199	30744554	-	1356	protein_coding	immediate early response 3 [Source:HGNC Symbol;Acc:HGNC:5392]	-
ENSG00000213639	39.316	38.7099	56.9834	29.039	28.0841	27.5727	28.0786	28.9883	37.455	41.0731	32.1563	28.6589	36.0631	26.0587	38.9891	46.9092	17.5014	22.6626	PPP1CB	2	28751640	28802940	+	5760	protein_coding	protein phosphatase 1 catalytic subunit beta [Source:HGNC Symbol;Acc:HGNC:9282]	-
ENSG00000204227	35.4161	47.1498	45.9876	38.3695	45.2731	45.6082	29.8801	38.1013	33.133	33.075	25.6045	23.538	23.5004	26.7901	23.5782	27.0939	25.1997	36.5546	RING1	6	33208495	33212722	+	1818	protein_coding	ring finger protein 1 [Source:HGNC Symbol;Acc:HGNC:10018]	-
ENSG00000168497	13.9518	22.0359	15.5468	23.3051	13.1033	6.74538	141.061	73.3533	20.7766	34.6697	12.8333	16.8248	52.8857	34.3628	39.4983	30.1292	18.1149	34.5596	CAVIN2	2	191834302	191847255	-	3229	protein_coding	caveolae associated protein 2 [Source:HGNC Symbol;Acc:HGNC:10690]	-
ENSG00000110958	27.2981	21.0528	34.115	26.0723	18.2092	21.53	41.7768	27.425	20.5964	39.9706	47.3444	48.2511	46.0073	34.8196	52.9282	37.0707	34.3463	22.7595	PTGES3	12	56663341	56688408	-	3399	protein_coding	prostaglandin E synthase 3 [Source:HGNC Symbol;Acc:HGNC:16049]	-
ENSG00000174080	32.2945	17.4974	39.9976	33.6233	18.7286	40.4824	42.2965	28.1794	32.259	61.1528	37.0718	26.3082	44.2142	24.1871	27.2951	24.3836	39.6576	31.1927	CTSF	11	66563463	66568841	-	2896	protein_coding	cathepsin F [Source:HGNC Symbol;Acc:HGNC:2531]	-
ENSG00000143753	41.2712	31.1873	50.9607	45.1923	24.0669	31.8531	51.7578	46.7434	32.3369	54.5136	21.1684	29.2765	23.6918	13.9256	32.8488	28.4229	14.5457	26.6661	DEGS1	1	224175756	224193441	+	2515	protein_coding	delta 4-desaturase, sphingolipid 1 [Source:HGNC Symbol;Acc:HGNC:13709]	-
ENSG00000135447	22.0875	13.2461	13.0115	39.0231	13.3824	18.2327	98.3088	67.0882	26.0197	49.6393	79.5305	6.50624	20.6625	46.3894	35.5753	6.54421	29.2933	15.4195	PPP1R1A	12	54575387	54588659	-	3982	protein_coding	protein phosphatase 1 regulatory inhibitor subunit 1A [Source:HGNC Symbol;Acc:HGNC:9286]	-
ENSG00000147400	42.3798	32.4202	48.7642	53.25	35.0262	28.1144	22.5926	33.3384	40.2971	31.3279	33.5168	25.6691	30.379	24.9401	36.6205	38.5077	20.8642	21.9262	CETN2	X	152826973	152830777	-	1928	protein_coding	centrin 2 [Source:HGNC Symbol;Acc:HGNC:1867]	-
ENSG00000134809	59.5352	23.1704	59.583	57.3762	19.1695	30.4742	49.855	57.2425	27.4515	35.9152	29.8347	21.2512	25.29	19.6596	18.3676	30.9734	14.0682	19.5988	TIMM10	11	57528463	57530803	-	777	protein_coding	translocase of inner mitochondrial membrane 10 [Source:HGNC Symbol;Acc:HGNC:11814]	-
ENSG00000168090	48.124	34.0865	50.0532	45.2775	37.8415	39.4734	31.495	40.4822	36.3808	35.4591	28.5819	21.6244	25.676	21.2156	27.2833	30.2536	20.9767	24.4564	COPS6	7	100088954	100092200	+	2807	protein_coding	COP9 signalosome subunit 6 [Source:HGNC Symbol;Acc:HGNC:21749]	-
ENSG00000140416	46.1204	34.6607	71.3618	25.8544	22.3198	30.205	15.9263	9.55266	57.0447	94.4095	13.8149	22.7689	21.9466	15.4467	20.0135	44.4413	12.3946	40.2965	TPM1	15	63042632	63071915	+	12876	protein_coding	tropomyosin 1 [Source:HGNC Symbol;Acc:HGNC:12010]	-
ENSG00000198848	21.1453	0.378811	20.743	100.201	18.9723	0.0842729	156.593	50.4158	51.5674	133.923	6.327	3.16739	9.51795	4.76386	11.7888	0.313153	3.83762	4.68722	CES1	16	55802851	55833337	-	2937	protein_coding	carboxylesterase 1 [Source:HGNC Symbol;Acc:HGNC:1863]	-
ENSG00000231389	36.478	22.611	12.6906	45.497	10.6439	18.5159	69.197	42.9341	21.1869	37.1397	18.0878	61.7263	40.5054	23.8407	13.9444	46.5626	6.0432	69.8148	HLA-DPA1	6	33064569	33080775	-	5748	protein_coding	major histocompatibility complex, class II, DP alpha 1 [Source:HGNC Symbol;Acc:HGNC:4938]	-
ENSG00000198355	14.9228	15.3502	13.6241	15.992	16.8307	18.5724	39.1348	23.1096	14.5259	19.5861	47.1167	27.7832	55.146	140.782	54.1932	11.1494	35.5335	33.9836	PIM3	22	49960513	49964080	+	2461	protein_coding	Pim-3 proto-oncogene, serine/threonine kinase [Source:HGNC Symbol;Acc:HGNC:19310]	-
ENSG00000135269	44.3463	49.3425	56.2996	44.5027	29.2131	30.958	22.0572	29.5901	47.3859	89.8566	12.5258	14.7908	19.9643	10.3968	14.9465	55.394	7.10572	16.7369	TES	7	116210493	116258783	+	4280	protein_coding	testin LIM domain protein [Source:HGNC Symbol;Acc:HGNC:14620]	-
ENSG00000130725	41.3249	24.3604	39.4669	43.9896	24.9551	47.7176	46.9666	35.1964	30.3271	41.3303	29.609	24.1838	31.8845	25.6568	37.1883	17.246	25.4188	26.5476	UBE2M	19	58555712	58558960	-	1831	protein_coding	ubiquitin conjugating enzyme E2 M [Source:HGNC Symbol;Acc:HGNC:12491]	-
ENSG00000137801	63.5908	32.873	26.4199	16.9232	25.5107	21.0447	34.5492	15.1702	49.8932	45.6488	15.9689	37.1628	30.3929	26.2479	12.489	42.5486	13.0607	83.5543	THBS1	15	39581079	39599466	+	9158	protein_coding	thrombospondin 1 [Source:HGNC Symbol;Acc:HGNC:11785]	-
ENSG00000107317	36.3557	26.5448	66.6624	43.5018	60.8736	85.09	45.1828	99.8032	7.99973	17.541	1.09671	23.0078	11.1765	0.391974	0.834138	11.9495	12.0963	42.8931	PTGDS	9	136975092	136981742	+	2711	protein_coding	prostaglandin D2 synthase [Source:HGNC Symbol;Acc:HGNC:9592]	-
ENSG00000114853	70.4597	34.802	56.2717	52.9961	38.9384	105.524	31.6402	31.5817	40.1037	49.6086	5.55359	8.18071	10.344	6.14792	5.39603	14.8924	5.80777	24.6971	ZBTB47	3	42653684	42665854	+	3781	protein_coding	zinc finger and BTB domain containing 47 [Source:HGNC Symbol;Acc:HGNC:26955]	ZBTB
ENSG00000171227	31.9292	6.37657	14.818	61.0762	13.3078	18.43	60.9516	40.7198	12.2696	19.264	70.515	16.4582	36.3957	43.2336	67.8361	5.06057	51.0198	21.899	TMEM37	2	119429901	119438520	+	2292	protein_coding	transmembrane protein 37 [Source:HGNC Symbol;Acc:HGNC:18216]	-
ENSG00000107562	22.3834	36.158	39.9881	23.0913	19.1295	15.2326	42.1394	31.4449	22.0007	44.3132	41.0054	45.8396	36.7375	21.7777	19.8048	64.3642	43.2899	21.9015	CXCL12	10	44370165	44386493	-	6077	protein_coding	C-X-C motif chemokine ligand 12 [Source:HGNC Symbol;Acc:HGNC:10672]	-
ENSG00000138107	51.5589	29.8386	44.1182	45.8107	36.6453	55.0789	46.7486	43.9999	37.3178	47.343	18.0673	17.0402	20.0625	16.4492	21.5953	18.2251	15.0841	25.3914	ACTR1A	10	102461881	102502711	-	4654	protein_coding	ARP1 actin related protein 1 homolog A [Source:HGNC Symbol;Acc:HGNC:167]	-
ENSG00000128567	9.81595	11.4547	8.00619	10.1379	6.13787	11.5821	12.706	7.21289	12.1952	16.3329	31.419	134.106	151.02	30.4089	32.1661	8.47391	45.7623	51.0593	PODXL	7	131500262	131558217	-	6874	protein_coding	podocalyxin like [Source:HGNC Symbol;Acc:HGNC:9171]	-
ENSG00000169813	26.996	26.5682	32.2549	27.9517	26.5787	20.2897	45.289	31.8973	20.0189	41.665	39.5012	46.5704	39.3229	33.9732	42.003	32.7342	29.7646	26.3651	HNRNPF	10	43385617	43409166	-	3253	protein_coding	heterogeneous nuclear ribonucleoprotein F [Source:HGNC Symbol;Acc:HGNC:5039]	-
ENSG00000239697	46.2721	41.8512	53.1693	51.9663	45.2561	58.1342	29.8349	42.0881	49.18	28.985	14.2409	18.0953	18.0146	16.6126	23.8825	14.6844	13.0052	23.7623	TNFSF12	17	7548891	7557890	+	1879	protein_coding	TNF superfamily member 12 [Source:HGNC Symbol;Acc:HGNC:11927]	-
ENSG00000154518	34.3024	17.1927	37.2495	53.1438	12.9011	23.7288	61.2689	33.6195	32.2683	71.7942	36.8976	13.3228	39.0427	22.7849	19.5228	29.1354	26.3261	24.1856	ATP5MC3	2	175176258	175184607	-	6780	protein_coding	ATP synthase membrane subunit c locus 3 [Source:HGNC Symbol;Acc:HGNC:843]	-
ENSG00000108861	52.4441	22.1073	45.3196	49.863	25.8464	53.5974	39.6848	22.7506	36.471	73.9653	19.9931	15.1734	28.8106	16.9262	23.1309	20.5017	15.2765	26.5918	DUSP3	17	43766121	43778988	-	5012	protein_coding	dual specificity phosphatase 3 [Source:HGNC Symbol;Acc:HGNC:3069]	-
ENSG00000136883	0.287486	0.0832861	0.102068	0.0447008	1.05548	0	0.0553951	0.0184742	0.0588739	0.124453	88.9489	28.4196	44.8896	137.993	51.5267	3.60164	183.175	48.0323	KIF12	9	114086126	114099291	-	3036	protein_coding	kinesin family member 12 [Source:HGNC Symbol;Acc:HGNC:21495]	-
ENSG00000069535	30.028	10.8979	14.1059	39.5728	3.20209	22.4308	93.7756	49.8405	31.0989	129.78	24.7305	17.3922	32.1436	13.2325	11.8547	14.4752	22.8543	26.9695	MAOB	X	43766611	43882447	-	2891	protein_coding	monoamine oxidase B [Source:HGNC Symbol;Acc:HGNC:6834]	-
ENSG00000134153	41.3399	24.628	43.3186	41.1635	26.8155	18.6142	43.3753	39.0206	29.9839	38.184	37.8777	28.3978	34.538	27.0036	39.0778	29.5016	23.4382	21.783	EMC7	15	34084017	34101948	-	1538	protein_coding	ER membrane protein complex subunit 7 [Source:HGNC Symbol;Acc:HGNC:24301]	-
ENSG00000149357	34.343	21.1897	42.6558	42.0374	17.4948	59.6351	60.2976	40.3798	26.0369	48.3617	28.3954	25.2658	25.1454	18.9029	31.584	24.2974	21.4405	20.5236	LAMTOR1	11	72085895	72103387	-	2778	protein_coding	late endosomal/lysosomal adaptor, MAPK and MTOR activator 1 [Source:HGNC Symbol;Acc:HGNC:26068]	-
ENSG00000111639	38.0498	22.8239	44.7937	39.5935	19.9335	27.6075	45.831	37.9342	20.9357	44.1978	34.2654	29.9592	35.5563	20.7824	38.5235	42.0366	24.8079	20.0687	MRPL51	12	6491886	6493841	-	1551	protein_coding	mitochondrial ribosomal protein L51 [Source:HGNC Symbol;Acc:HGNC:14044]	-
ENSG00000139641	37.7069	13.4415	23.5019	43.446	9.62555	73.5214	94.3005	35.4108	27.1382	93.0079	12.2885	19.9754	16.4212	16.0809	15.1315	9.27415	11.2412	35.6851	ESYT1	12	56118250	56144671	+	5493	protein_coding	extended synaptotagmin 1 [Source:HGNC Symbol;Acc:HGNC:29534]	-
ENSG00000116030	31.3668	23.3927	35.3125	35.1508	24.817	20.8164	37.3559	35.3787	24.7518	31.154	46.8639	36.196	39.5152	28.7267	46.467	36.9763	32.0813	20.8298	SUMO1	2	202206180	202238608	-	2164	protein_coding	small ubiquitin-like modifier 1 [Source:HGNC Symbol;Acc:HGNC:12502]	-
ENSG00000104408	30.7465	41.7287	40.5707	34.9619	44.5777	20.5949	39.0225	37.2859	30.6385	28.8357	25.6301	45.7464	32.3328	13.0876	28.2099	54.7636	17.4265	20.3077	EIF3E	8	108201216	108435333	-	6005	protein_coding	eukaryotic translation initiation factor 3 subunit E [Source:HGNC Symbol;Acc:HGNC:3277]	-
ENSG00000125503	45.5705	35.1499	53.9461	36.9756	47.4593	78.0182	23.9666	23.8695	58.5239	49.5826	10.9255	12.3598	18.5176	14.1954	11.0508	20.1118	13.9408	31.1188	PPP1R12C	19	55090913	55117559	-	7726	protein_coding	protein phosphatase 1 regulatory subunit 12C [Source:HGNC Symbol;Acc:HGNC:14947]	-
ENSG00000136938	31.7913	21.3493	30.9544	27.179	20.4648	19.9792	48.2417	32.5914	24.6373	34.5453	42.6391	54.8353	39.986	28.385	43.733	26.9015	28.8079	28.1847	ANP32B	9	97983361	98015943	+	1850	protein_coding	acidic nuclear phosphoprotein 32 family member B [Source:HGNC Symbol;Acc:HGNC:16677]	-
ENSG00000125652	35.623	23.3566	36.4188	34.6042	20.8001	34.4756	42.9214	32.9587	23.955	38.9154	36.7497	36.1236	39.8192	24.6185	42.3086	27.9888	29.3497	23.8629	ALKBH7	19	6372433	6375251	+	1455	protein_coding	alkB homolog 7 [Source:HGNC Symbol;Acc:HGNC:21306]	-
ENSG00000113384	30.978	32.8668	37.7641	27.7027	27.7637	31.4904	38.8091	35.6262	31.1701	48.5309	32.1772	32.1333	40.1042	23.7521	31.3964	31.7218	23.3927	26.0931	GOLPH3	5	32124704	32174350	-	2785	protein_coding	golgi phosphoprotein 3 [Source:HGNC Symbol;Acc:HGNC:15452]	-
ENSG00000242299	39.2011	52.224	41.7223	41.0979	59.4707	23.1872	26.3811	45.5788	29.4657	11.7597	18.7241	44.1825	26.3773	13.9872	37.1144	40.2981	14.8181	16.7212	AC073861.1	3	101576489	101576947	-	459	processed_pseudogene	ribosomal protein S18 (RPS18) pseudogene	-
ENSG00000102172	19.9552	23.2487	31.7053	20.828	29.0388	17.3028	25.5903	24.1748	17.8741	21.7907	69.5335	29.1784	47.4532	50.3443	48.5073	27.4406	57.8713	20.1916	SMS	X	21940573	21994835	+	2160	protein_coding	spermine synthase [Source:HGNC Symbol;Acc:HGNC:11123]	-
ENSG00000152137	61.3877	27.3898	60.6323	55.3524	24.193	60.9831	39.8691	41.3793	47.3727	47.5602	3.16746	19.9226	23.2276	3.49879	4.86708	20.3313	5.35084	32.6929	HSPB8	12	119178642	119221131	+	2860	protein_coding	heat shock protein family B (small) member 8 [Source:HGNC Symbol;Acc:HGNC:30171]	-
ENSG00000116586	49.2572	23.0701	47.9688	54.5489	44.4029	51.8657	39.4134	43.4113	24.8183	31.3802	24.1326	21.8657	23.8037	18.4127	24.3223	23.0608	15.676	17.7487	LAMTOR2	1	156054752	156058510	+	1438	protein_coding	late endosomal/lysosomal adaptor, MAPK and MTOR activator 2 [Source:HGNC Symbol;Acc:HGNC:29796]	-
ENSG00000173801	19.3592	13.3745	17.2058	16.8335	17.3389	14.1401	20.3617	24.2305	11.2602	17.5409	84.4048	34.6072	43.5329	61.9893	84.5299	5.26264	70.0815	22.4326	JUP	17	41754604	41786931	-	4942	protein_coding	junction plakoglobin [Source:HGNC Symbol;Acc:HGNC:6207]	-
ENSG00000129116	42.0001	32.9708	71.4371	34.4848	22.0315	30.8265	22.0991	13.6753	65.436	95.5618	6.41216	18.0415	28.0152	8.49287	11.2687	40.6587	7.93052	26.0962	PALLD	4	168497066	168928457	+	10114	protein_coding	palladin, cytoskeletal associated protein [Source:HGNC Symbol;Acc:HGNC:17068]	-
ENSG00000160948	42.4674	36.9792	41.6845	44.9372	39.9283	49.8872	26.9367	35.0901	36.6588	27.1102	23.986	24.7067	23.512	23.0018	21.9862	25.8802	24.0655	28.1858	VPS28	8	144423601	144428563	-	3769	protein_coding	VPS28, ESCRT-I subunit [Source:HGNC Symbol;Acc:HGNC:18178]	-
ENSG00000163359	32.5625	75.5723	70.941	37.6658	68.2941	18.0446	53.7041	64.8465	29.3699	36.1588	1.16181	6.87049	5.32083	2.04323	2.36249	56.6683	1.4278	13.9647	COL6A3	2	237324003	237414375	-	19633	protein_coding	collagen type VI alpha 3 chain [Source:HGNC Symbol;Acc:HGNC:2213]	-
ENSG00000116898	51.0681	35.2404	43.6339	60.5258	47.233	52.5972	42.7754	54.6065	37.0641	29.9317	16.1545	9.87368	17.7383	11.1451	16.3888	23.7783	11.3125	15.2283	MRPS15	1	36455718	36464437	-	2916	protein_coding	mitochondrial ribosomal protein S15 [Source:HGNC Symbol;Acc:HGNC:14504]	-
ENSG00000131634	40.2769	22.704	29.5498	22.044	12.6684	25.5127	46.5841	38.6065	18.8317	26.5534	26.984	32.9023	50.1966	41.4	61.0539	25.2111	22.1432	32.5544	TMEM204	16	1528688	1555580	+	2047	protein_coding	transmembrane protein 204 [Source:HGNC Symbol;Acc:HGNC:14158]	-
ENSG00000124562	40.1152	26.8895	46.7852	45.6446	29.1828	24.5507	40.1682	31.7991	33.6394	33.6458	28.7758	27.5728	25.5142	24.5134	36.7545	37.0918	22.7884	20.2249	SNRPC	6	34757406	34773794	+	1277	protein_coding	small nuclear ribonucleoprotein polypeptide C [Source:HGNC Symbol;Acc:HGNC:11157]	-
ENSG00000214578	13.6765	45.8888	29.6107	57.8031	52.9677	34.2235	44.225	83.9236	56.4911	59.3747	1.03236	1.03363	8.45177	3.77172	3.35015	24.4126	2.87895	51.8889	HMGN2P15	17	42753530	42753799	-	270	processed_pseudogene	high mobility group nucleosomal binding domain 2 pseudogene 15 [Source:HGNC Symbol;Acc:HGNC:39020]	-
ENSG00000122679	18.5374	16.9044	20.5862	29.4343	12.5586	18.0964	66.5882	59.1926	19.7488	27.8396	23.7326	53.3256	55.3037	34.9684	39.0537	19.6937	26.9977	32.2707	RAMP3	7	45157791	45186302	+	1427	protein_coding	receptor activity modifying protein 3 [Source:HGNC Symbol;Acc:HGNC:9845]	-
ENSG00000136240	38.9878	29.0246	42.9793	34.7102	25.5956	31.7399	44.4263	41.8197	32.1943	37.6216	25.9408	32.1163	30.7568	19.8191	35.504	29.3003	18.1544	23.6019	KDELR2	7	6445953	6484242	-	3990	protein_coding	KDEL endoplasmic reticulum protein retention receptor 2 [Source:HGNC Symbol;Acc:HGNC:6305]	-
ENSG00000163344	35.6677	16.6727	33.4573	46.2268	16.7825	66.8405	36.7893	25.327	19.6895	44.1515	43.4799	24.6375	36.4483	25.7013	30.6224	18.0433	33.4382	20.0823	PMVK	1	154924734	154936991	-	1280	protein_coding	phosphomevalonate kinase [Source:HGNC Symbol;Acc:HGNC:9141]	-
ENSG00000170348	26.1727	21.4425	34.1154	26.0155	16.5473	24.6647	41.4644	31.7311	20.9142	46.2722	44.476	41.8282	39.5699	29.6247	39.1591	39.5908	28.3836	22.0678	TMED10	14	75131470	75176631	-	4974	protein_coding	transmembrane p24 trafficking protein 10 [Source:HGNC Symbol;Acc:HGNC:16998]	-
ENSG00000267505	43.0073	44.3624	140.052	39.9649	21.4347	21.2864	14.8628	18.8622	59.6864	89.3214	0.41331	0.331055	9.5872	0.787843	0.178833	47.3685	0.0864452	22.436	AC005180.2	17	44793199	44794474	+	562	lincRNA	novel transcript	-
ENSG00000126945	32.1048	30.5066	37.0796	29.4256	27.5485	27.0186	34.0444	25.3567	23.9608	45.8914	41.963	35.7794	38.6375	24.638	31.3765	42.5227	23.3186	22.7705	HNRNPH2	X	101408295	101414133	+	2223	protein_coding	heterogeneous nuclear ribonucleoprotein H2 [Source:HGNC Symbol;Acc:HGNC:5042]	-
ENSG00000163382	34.2121	23.9383	48.3816	42.4406	20.1079	31.5416	40.225	31.3661	34.3982	40.4618	37.011	23.4611	31.7761	29.2277	31.4044	22.8387	28.3501	22.2791	NAXE	1	156591762	156594299	+	1933	protein_coding	NAD(P)HX epimerase [Source:HGNC Symbol;Acc:HGNC:18453]	-
ENSG00000148248	27.4908	20.7656	30.2685	26.524	17.7025	28.2512	59.0043	35.4332	22.9608	50.6876	33.622	39.4269	38.2059	31.428	37.2298	19.8988	27.4491	26.3556	SURF4	9	133361449	133376166	-	3446	protein_coding	surfeit 4 [Source:HGNC Symbol;Acc:HGNC:11476]	-
ENSG00000084090	38.4217	18.1479	31.2126	34.5736	21.5371	47.9804	39.8032	25.8582	36.0533	71.9286	34.1737	21.8129	30.6602	21.4262	30.0215	22.5036	22.6071	21.6522	STARD7	2	96184859	96208825	-	4414	protein_coding	StAR related lipid transfer domain containing 7 [Source:HGNC Symbol;Acc:HGNC:18063]	-
ENSG00000088448	32.4145	52.1118	24.9235	32.5524	61.006	41.9115	12.5929	32.4012	42.7104	15.9459	15.0374	29.0312	19.7264	31.7011	15.6715	44.8701	24.4455	40.5153	ANKRD10	13	110878540	110915069	-	4563	protein_coding	ankyrin repeat domain 10 [Source:HGNC Symbol;Acc:HGNC:20265]	-
ENSG00000078369	32.8424	22.6732	32.0455	31.0993	19.4106	28.8382	46.2491	31.5881	22.6084	54.1873	32.7009	38.3587	38.4261	26.5992	35.0129	25.1619	25.8318	25.1076	GNB1	1	1785285	1891117	-	6417	protein_coding	G protein subunit beta 1 [Source:HGNC Symbol;Acc:HGNC:4396]	-
ENSG00000081154	28.0071	23.2315	35.3834	31.3904	25.749	18.3252	33.9576	29.7977	31.1539	40.8569	38.5486	36.6318	35.2089	24.8218	41.2936	44.8863	24.9019	24.0157	PCNP	3	101574095	101594437	+	3102	protein_coding	PEST proteolytic signal containing nuclear protein [Source:HGNC Symbol;Acc:HGNC:30023]	-
ENSG00000090238	40.7985	40.5079	39.4339	46.6736	68.7808	39.5528	24.1968	36.2515	30.7548	20.0229	18.7226	21.9333	18.7913	15.7565	28.4831	22.8576	25.5053	29.0874	YPEL3	16	30092314	30096915	-	3181	protein_coding	yippee like 3 [Source:HGNC Symbol;Acc:HGNC:18327]	-
ENSG00000131408	54.5271	22.8939	40.5907	56.5918	32.4298	60.0143	32.0107	32.8186	30.3379	40.587	21.9097	17.9583	24.7608	20.5752	28.8016	11.3819	17.1391	22.5442	NR1H2	19	50329653	50382982	+	3753	protein_coding	nuclear receptor subfamily 1 group H member 2 [Source:HGNC Symbol;Acc:HGNC:7965]	THR-like
ENSG00000187840	30.222	34.9239	55.9111	48.3149	37.6068	42.4434	55.4851	67.5874	31.928	47.7392	12.1227	13.5682	13.5874	10.7288	18.546	19.5242	8.91957	18.3364	EIF4EBP1	8	38030341	38060365	+	1073	protein_coding	eukaryotic translation initiation factor 4E binding protein 1 [Source:HGNC Symbol;Acc:HGNC:3288]	-
ENSG00000182871	26.8714	50.0196	30.2282	14.781	29.0616	21.0686	33.4781	21.8297	17.8776	25.3328	31.5029	54.3645	42.9925	37.9144	33.4582	13.1621	43.8864	38.6557	COL18A1	21	45405137	45513720	+	8525	protein_coding	collagen type XVIII alpha 1 chain [Source:HGNC Symbol;Acc:HGNC:2195]	-
ENSG00000130175	33.5176	26.9596	41.0653	40.1277	35.6209	30.1841	36.3532	42.0168	29.202	26.7691	26.0607	32.0892	28.6511	24.9325	37.3633	11.058	27.4791	36.6705	PRKCSH	19	11435288	11450968	+	5166	protein_coding	protein kinase C substrate 80K-H [Source:HGNC Symbol;Acc:HGNC:9411]	-
ENSG00000122477	85.9556	39.7255	45.9761	46.2142	54.2746	89.0918	6.84206	9.52165	79.5702	41.0724	0.256663	0.420511	6.74953	0.555961	0.403835	36.5963	1.00044	21.6301	LRRC39	1	100148449	100178273	-	1991	protein_coding	leucine rich repeat containing 39 [Source:HGNC Symbol;Acc:HGNC:28228]	-
ENSG00000159403	36.9408	33.6512	65.0615	28.4914	46.1219	20.3559	32.0165	22.4064	37.7225	45.7956	8.15447	52.4489	25.3015	10.7513	15.3361	29.1209	8.14794	47.1365	C1R	12	7080199	7092607	-	5885	protein_coding	complement C1r [Source:HGNC Symbol;Acc:HGNC:1246]	-
ENSG00000105974	23.405	32.4712	21.1951	40.5107	6.81801	14.2491	82.5516	49.0114	21.5143	91.8482	12.974	12.0442	21.8179	15.294	23.0456	64.8904	7.05763	22.8611	CAV1	7	116524785	116561184	+	4082	protein_coding	caveolin 1 [Source:HGNC Symbol;Acc:HGNC:1527]	-
ENSG00000137161	38.9423	32.2569	34.97	42.5288	39.2374	46.408	31.0097	35.1203	26.1012	25.6958	25.4803	39.5308	22.956	23.4574	32.4056	22.1457	18.5021	26.5427	CNPY3	6	42929192	42939287	+	1712	protein_coding	canopy FGF signaling regulator 3 [Source:HGNC Symbol;Acc:HGNC:11968]	-
ENSG00000143420	44.4783	27.0487	33.566	39.7771	30.4755	38.8109	35.7097	33.1338	32.8978	35.1494	29.3722	25.7673	30.6844	22.0699	31.4156	29.655	22.3498	20.6703	ENSA	1	150600851	150629612	-	5493	protein_coding	endosulfine alpha [Source:HGNC Symbol;Acc:HGNC:3360]	-
ENSG00000187498	50.8259	45.5993	38.4647	36.4004	20.3093	21.3731	78.9889	49.9339	20.3345	74.5196	11.6408	22.234	19.2642	11.1698	7.12969	14.6133	14.7217	25.1828	COL4A1	13	110148963	110307233	-	14738	protein_coding	collagen type IV alpha 1 chain [Source:HGNC Symbol;Acc:HGNC:2202]	-
ENSG00000102144	16.8944	10.4225	20.7448	18.9706	7.76218	21.3742	59.294	17.5528	19.3593	63.7305	53.1985	38.3784	51.7157	32.9345	39.3211	28.5238	39.4334	22.3451	PGK1	X	77910739	78129296	+	5512	protein_coding	phosphoglycerate kinase 1 [Source:HGNC Symbol;Acc:HGNC:8896]	-
ENSG00000161547	29.9534	42.9613	28.7797	29.396	34.7355	33.7998	28.4294	36.4002	38.5091	21.9343	23.7592	24.4206	25.9688	29.4249	29.0154	41.8322	31.1751	30.9916	SRSF2	17	76734115	76737374	-	3017	protein_coding	serine and arginine rich splicing factor 2 [Source:HGNC Symbol;Acc:HGNC:10783]	-
ENSG00000085733	39.7482	39.0656	45.2088	35.4073	37.779	44.7956	27.1869	33.8027	38.6943	37.8204	18.6854	17.0149	19.1013	27.1943	23.6256	22.8532	21.3093	31.9423	CTTN	11	70398404	70436584	+	6949	protein_coding	cortactin [Source:HGNC Symbol;Acc:HGNC:3338]	-
ENSG00000067182	38.5233	28.2719	40.4507	39.087	33.812	42.7451	57.7815	44.66	32.2225	51.0794	11.4139	31.2759	23.3927	14.9026	16.6504	13.3577	11.0629	29.947	TNFRSF1A	12	6328757	6342114	-	4005	protein_coding	TNF receptor superfamily member 1A [Source:HGNC Symbol;Acc:HGNC:11916]	-
ENSG00000119801	31.4206	23.4156	32.0115	32.2915	23.296	17.9187	32.4954	29.0521	25.5668	38.7511	37.6564	30.8502	32.1666	30.454	58.0816	35.8913	23.9574	24.4471	YPEL5	2	30146941	30160533	+	3421	protein_coding	yippee like 5 [Source:HGNC Symbol;Acc:HGNC:18329]	-
ENSG00000023734	33.8277	25.5258	38.2058	36.7361	19.2705	28.3593	45.6896	36.6053	29.2917	42.8203	32.4835	28.6526	34.8335	21.8881	34.1833	28.7488	20.6766	21.0207	STRAP	12	15882391	15903478	+	2211	protein_coding	serine/threonine kinase receptor associated protein [Source:HGNC Symbol;Acc:HGNC:30796]	-
ENSG00000170540	24.7972	25.4788	29.179	24.5806	27.9549	26.0833	34.0396	38.3862	26.7186	28.0339	49.4593	29.6639	33.0774	30.4599	47.6066	32.6007	33.2495	16.2668	ARL6IP1	16	18791667	18801678	-	3666	protein_coding	ADP ribosylation factor like GTPase 6 interacting protein 1 [Source:HGNC Symbol;Acc:HGNC:697]	-
ENSG00000087077	29.1128	27.7041	40.4768	30.1985	27.0658	31.7705	29.4904	26.5826	33.4688	37.8725	35.9445	25.2486	25.1789	34.29	35.815	23.2869	32.0067	31.587	TRIP6	7	100867138	100873454	+	2802	protein_coding	thyroid hormone receptor interactor 6 [Source:HGNC Symbol;Acc:HGNC:12311]	-
ENSG00000100138	35.1736	27.3741	38.0739	37.4249	33.9643	30.1855	29.331	33.1931	25.886	29.0702	33.962	28.8287	30.3312	24.9793	41.6596	29.7509	26.4798	21.1013	SNU13	22	41673930	41690504	-	2930	protein_coding	small nuclear ribonucleoprotein 13 [Source:HGNC Symbol;Acc:HGNC:7819]	-
ENSG00000130731	45.8234	35.3723	39.0482	43.5316	47.7974	50.8093	26.3757	36.9933	31.5158	21.5908	22.6187	21.6807	21.8222	19.5495	24.7142	26.0786	20.309	21.1365	METTL26	16	634427	636366	-	1830	protein_coding	methyltransferase like 26 [Source:HGNC Symbol;Acc:HGNC:14141]	-
ENSG00000130726	30.1743	28.6704	38.5775	29.7395	36.0844	28.6941	31.4763	27.1261	32.5669	35.4718	30.1722	35.3749	30.1228	31.7642	37.658	11.8937	29.1084	31.6796	TRIM28	19	58544091	58550722	+	4034	protein_coding	tripartite motif containing 28 [Source:HGNC Symbol;Acc:HGNC:16384]	-
ENSG00000113811	45.3383	37.5372	46.3459	42.3747	42.512	38.4126	24.0552	36.1655	32.0331	23.9842	21.2002	21.3767	29.63	18.2424	30.8012	37.738	14.1595	14.1521	SELENOK	3	53884410	53891988	-	2165	protein_coding	selenoprotein K [Source:HGNC Symbol;Acc:HGNC:30394]	-
ENSG00000156642	30.3725	32.2844	38.3353	27.0616	20.8401	27.9717	25.4021	19.7531	35.2429	62.8795	35.107	23.9372	37.6053	24.104	27.0953	39.2979	24.0983	24.4136	NPTN	15	73560014	73634134	-	4032	protein_coding	neuroplastin [Source:HGNC Symbol;Acc:HGNC:17867]	-
ENSG00000260260	16.294	28.9824	20.115	17.6584	32.9674	26.0536	23.932	30.6678	14.9822	17.5189	54.0628	33.8649	34.4743	25.2455	77.4354	39.1439	46.8776	15.3173	SNHG19	16	2154797	2155358	-	342	lincRNA	small nucleolar RNA host gene 19 [Source:HGNC Symbol;Acc:HGNC:49574]	-
ENSG00000013275	43.625	37.4995	48.4487	43.2663	38.5831	32.9391	31.5645	36.1855	37.4905	32.5852	17.8273	21.1618	23.7407	19.1798	29.8734	25.9869	16.2212	19.2921	PSMC4	19	39971005	39981441	+	2387	protein_coding	proteasome 26S subunit, ATPase 4 [Source:HGNC Symbol;Acc:HGNC:9551]	-
ENSG00000162517	34.7604	22.7764	38.7662	33.3338	22.0898	35.5279	32.1457	26.923	30.5794	37.6651	34.6282	24.6246	28.4066	28.6696	49.3045	28.2211	23.5167	23.1672	PEF1	1	31629862	31644896	-	2227	protein_coding	penta-EF-hand domain containing 1 [Source:HGNC Symbol;Acc:HGNC:30009]	-
ENSG00000126698	30.1754	24.8129	46.7394	32.2362	23.753	24.1967	37.9297	36.7249	32.8022	45.0805	26.7347	26.6227	29.1261	21.7244	31.7556	38.5522	21.65	23.5384	DNAJC8	1	28199456	28233025	-	2888	protein_coding	DnaJ heat shock protein family (Hsp40) member C8 [Source:HGNC Symbol;Acc:HGNC:15470]	-
ENSG00000140740	21.6848	16.2464	25.5768	27.4571	14.3206	25.4136	64.9894	26.1032	30.2413	78.8497	34.8175	17.8581	38.8203	24.7397	17.5599	33.4471	31.6711	24.1924	UQCRC2	16	21952660	21983660	+	5217	protein_coding	ubiquinol-cytochrome c reductase core protein 2 [Source:HGNC Symbol;Acc:HGNC:12586]	-
ENSG00000169439	29.81	27.5712	30.0862	37.0245	16.4445	17.2245	42.4156	26.1149	23.5379	53.2035	38.9387	29.6245	34.1536	15.657	47.3718	34.188	30.4282	18.1692	SDC2	8	96493351	96611780	+	4536	protein_coding	syndecan 2 [Source:HGNC Symbol;Acc:HGNC:10659]	-
ENSG00000198856	35.8325	30.8682	37.6761	34.3266	22.0558	20.1028	38.968	39.3688	21.4445	31.8788	26.3739	44.5859	30.9689	19.9889	28.4669	47.9363	19.2586	21.6605	OSTC	4	108650584	108667820	+	1617	protein_coding	oligosaccharyltransferase complex non-catalytic subunit [Source:HGNC Symbol;Acc:HGNC:24448]	-
ENSG00000233762	33.7949	35.5244	38.1283	36.7363	51.5088	39.4982	32.2313	43.0381	17.7275	15.698	16.4207	41.4144	23.682	15.5513	40.3592	38.065	13.803	18.2603	AC007969.1	2	171517270	171517716	-	447	processed_pseudogene	ribosomal protein S15 (RPS15) pseudogene	-
ENSG00000114023	46.3938	23.8257	40.6201	67.6412	35.0291	36.7164	44.236	42.0546	31.306	35.2779	25.402	11.9441	20.6392	14.9185	22.536	22.2409	14.5375	15.8988	FAM162A	3	122384176	122412334	+	3793	protein_coding	family with sequence similarity 162 member A [Source:HGNC Symbol;Acc:HGNC:17865]	-
ENSG00000119632	58.3327	35.7833	56.4197	40.0521	44.2739	48.8467	15.516	31.8235	29.6827	23.9032	23.8429	21.9692	15.8661	14.972	23.9771	41.4426	10.9032	12.901	IFI27L2	14	94127779	94130253	-	1662	protein_coding	interferon alpha inducible protein 27 like 2 [Source:HGNC Symbol;Acc:HGNC:19753]	-
ENSG00000159199	40.6943	25.4887	47.0211	56.127	30.3855	35.9985	27.1831	34.6606	34.2673	28.2992	31.1069	13.8739	28.4581	26.1597	22.0418	23.7211	26.2697	18.5884	ATP5MC1	17	48892765	48895871	+	2615	protein_coding	ATP synthase membrane subunit c locus 1 [Source:HGNC Symbol;Acc:HGNC:841]	-
ENSG00000244716	19.4764	20.7752	75.5994	23.719	10.4783	19.6224	45.2519	11.6218	13.097	43.7651	27.8736	53.6368	30.1523	20.1838	38.8436	55.1471	18.8201	22.2799	BX679664.3	1	108992282	108992836	+	555	processed_pseudogene	ribosomal protein L17 (RPL17) pseudogene	-
ENSG00000136842	58.7739	26.9905	61.1067	49.6292	40.2651	46.9476	13.2439	23.1278	62.6494	87.8946	0.651487	0.890625	12.9922	1.06274	1.34169	32.7964	1.03506	28.4688	TMOD1	9	97501180	97601748	+	3708	protein_coding	tropomodulin 1 [Source:HGNC Symbol;Acc:HGNC:11871]	-
ENSG00000132840	17.1751	25.969	38.8761	38.0223	40.2634	27.4578	20.6833	27.7618	31.3443	35.4532	46.7188	12.8781	39.8418	23.4881	27.8424	18.6432	49.9411	27.0682	BHMT2	5	79069717	79089466	+	3182	protein_coding	betaine--homocysteine S-methyltransferase 2 [Source:HGNC Symbol;Acc:HGNC:1048]	-
ENSG00000139112	15.232	10.4212	14.8948	14.0827	12.1704	15.7495	56.4303	26.0122	17.6146	36.1564	58.6669	21.014	78.9018	45.3062	40.7454	14.3059	50.2111	21.3628	GABARAPL1	12	10212458	10223130	+	4086	protein_coding	GABA type A receptor associated protein like 1 [Source:HGNC Symbol;Acc:HGNC:4068]	-
ENSG00000183283	19.3299	15.1511	20.6226	16.8485	11.9387	15.2453	31.8986	22.1473	17.2784	33.5767	53.9379	45.4094	49.7174	42.6775	57.2232	28.2451	44.2504	23.1918	DAZAP2	12	51238292	51271362	+	5731	protein_coding	DAZ associated protein 2 [Source:HGNC Symbol;Acc:HGNC:2684]	-
ENSG00000158526	41.7978	22.5824	48.9666	41.2266	38.8775	29.7958	30.8073	33.7842	26.2169	29.6627	32.0407	23.6508	31.2396	19.5695	33.4141	20.685	25.4629	18.7822	TSR2	X	54440401	54445487	+	1534	protein_coding	TSR2, ribosome maturation factor [Source:HGNC Symbol;Acc:HGNC:25455]	-
ENSG00000172057	26.2866	15.9451	21.87	39.3173	17.8562	32.7638	90.7984	63.4424	19.7384	54.6675	26.5711	26.2071	20.2059	16.415	28.6084	12.5562	17.8428	17.3063	ORMDL3	17	39921041	39927601	-	3752	protein_coding	ORMDL sphingolipid biosynthesis regulator 3 [Source:HGNC Symbol;Acc:HGNC:16038]	-
ENSG00000141232	20.4001	22.1061	27.3372	18.8414	16.8538	28.6356	21.4366	18.9999	28.9985	34.7928	41.0199	24.0961	44.1028	66.9157	40.9234	27.7877	35.9212	28.7289	TOB1	17	50862223	50867978	-	2521	protein_coding	transducer of ERBB2, 1 [Source:HGNC Symbol;Acc:HGNC:11979]	-
ENSG00000067082	32.9189	18.4113	17.7478	13.3744	12.7692	14.3262	59.8221	19.0857	23.9331	24.8124	23.9204	37.8455	38.1218	84.4064	26.4235	26.3596	19.6181	53.4416	KLF6	10	3775996	3785281	-	6139	protein_coding	Kruppel like factor 6 [Source:HGNC Symbol;Acc:HGNC:2235]	zf-C2H2
ENSG00000064601	44.8512	22.4531	42.4179	51.2627	26.9549	40.1104	48.5737	44.7954	36.2305	40.3537	16.9926	13.9397	25.2427	14.4262	16.9567	10.9417	22.0346	28.5426	CTSA	20	45890144	45898820	+	5856	protein_coding	cathepsin A [Source:HGNC Symbol;Acc:HGNC:9251]	-
ENSG00000169021	18.4512	10.3471	29.5166	38.0579	8.06018	21.9375	67.5622	22.0638	23.8836	71.9486	51.5094	18.4179	40.7509	25.3684	26.6807	21.6736	28.8557	21.9112	UQCRFS1	19	29205321	29213541	-	3475	protein_coding	ubiquinol-cytochrome c reductase, Rieske iron-sulfur polypeptide 1 [Source:HGNC Symbol;Acc:HGNC:12587]	-
ENSG00000100836	34.0373	54.8639	28.8613	37.937	44.6897	45.4874	18.4841	37.8403	30.1745	16.6972	18.266	16.6684	19.6249	23.6463	18.7992	35.1847	26.3216	38.66	PABPN1	14	23321289	23326185	+	3876	protein_coding	poly(A) binding protein nuclear 1 [Source:HGNC Symbol;Acc:HGNC:8565]	-
ENSG00000087074	73.3256	37.6219	34.3442	20.0738	35.0906	35.7167	44.8044	19.2943	31.129	24.9205	17.0774	15.3239	25.6586	40.0395	20.0489	19.2457	10.1154	41.7313	PPP1R15A	19	48872392	48876057	+	3093	protein_coding	protein phosphatase 1 regulatory subunit 15A [Source:HGNC Symbol;Acc:HGNC:14375]	-
ENSG00000099804	48.0207	29.0876	42.7002	48.7081	42.2601	54.8039	38.2488	37.979	33.3491	27.461	15.6448	18.6101	18.7684	15.3669	19.3298	14.8658	15.3602	24.5283	CDC34	19	531712	542092	+	1942	protein_coding	cell division cycle 34 [Source:HGNC Symbol;Acc:HGNC:1734]	-
ENSG00000167615	25.2719	44.4815	20.9333	20.7585	34.2068	32.8661	7.07139	28.2215	55.1319	10.6052	18.4129	18.0761	17.2066	50.6969	16.3753	19.8808	47.636	76.4309	LENG8	19	54448887	54462037	+	6469	protein_coding	leukocyte receptor cluster member 8 [Source:HGNC Symbol;Acc:HGNC:15500]	-
ENSG00000163513	8.69212	8.58981	10.1844	11.7853	4.33959	9.48857	77.1061	35.2097	11.7666	50.1789	27.5339	71.8463	67.7004	25.6869	29.7731	31.2182	31.7375	31.1558	TGFBR2	3	30606502	30694142	+	4704	protein_coding	transforming growth factor beta receptor 2 [Source:HGNC Symbol;Acc:HGNC:11773]	-
ENSG00000167978	26.7828	38.9482	24.3867	24.3424	34.6449	26.0209	12.107	28.5638	59.3424	18.4114	23.3436	20.2097	22.2284	46.0123	19.3115	15.2064	39.6026	64.4165	SRRM2	16	2752329	2772538	+	13266	protein_coding	serine/arginine repetitive matrix 2 [Source:HGNC Symbol;Acc:HGNC:16639]	-
ENSG00000164949	58.0115	67.4921	44.7968	16.7077	50.9825	16.5754	44.2889	14.1066	26.8652	20.9752	10.6666	14.6495	15.2247	20.8843	13.7586	71.8203	3.08226	32.7109	GEM	8	94249253	94262350	-	2648	protein_coding	GTP binding protein overexpressed in skeletal muscle [Source:HGNC Symbol;Acc:HGNC:4234]	-
ENSG00000068001	22.9558	35.0939	28.1994	39.8625	20.6161	28.4268	51.1014	54.1625	23.216	29.4291	19.0628	15.9035	35.3412	38.4706	39.66	19.0332	16.3758	26.523	HYAL2	3	50317790	50322906	-	4545	protein_coding	hyaluronoglucosaminidase 2 [Source:HGNC Symbol;Acc:HGNC:5321]	-
ENSG00000100028	32.3556	35.2449	38.1746	36.8353	30.8836	26.7876	33.0321	34.0847	26.2538	33.8842	28.0306	25.0667	26.935	19.841	28.1483	43.002	23.6991	21.0706	SNRPD3	22	24555503	24609980	+	2544	protein_coding	small nuclear ribonucleoprotein D3 polypeptide [Source:HGNC Symbol;Acc:HGNC:11160]	-
ENSG00000114315	34.5138	19.792	15.5691	24.7796	16.4901	23.8867	30.2321	48.1994	15.2274	8.21958	48.9568	14.6171	24.6544	65.9857	50.764	13.3812	43.5402	44.193	HES1	3	194136145	194138732	+	2062	protein_coding	hes family bHLH transcription factor 1 [Source:HGNC Symbol;Acc:HGNC:5192]	bHLH
ENSG00000138073	37.6029	28.3237	30.5743	41.059	25.3504	70.2852	41.1616	30.2465	45.7628	54.9322	11.221	14.8883	15.8028	12.2479	14.3533	19.2265	12.4585	37.1984	PREB	2	27130756	27134675	-	3221	protein_coding	prolactin regulatory element binding [Source:HGNC Symbol;Acc:HGNC:9356]	Others
ENSG00000118564	27.0436	23.1016	37.1611	40.212	31.2992	22.227	47.9322	42.0197	32.1289	49.4209	25.0109	20.5256	29.1506	17.0407	24.8679	33.6544	17.9328	21.9383	FBXL5	4	15604539	15681679	-	4573	protein_coding	F-box and leucine rich repeat protein 5 [Source:HGNC Symbol;Acc:HGNC:13602]	-
ENSG00000109390	37.288	23.032	39.4334	39.1194	25.3141	31.4116	27.9577	29.1852	27.0122	24.305	37.8876	20.8962	37.2622	25.1609	36.66	30.5366	31.1367	18.2959	NDUFC1	4	139266880	139302551	-	1941	protein_coding	NADH:ubiquinone oxidoreductase subunit C1 [Source:HGNC Symbol;Acc:HGNC:7705]	-
ENSG00000143575	36.9187	24.4056	39.1699	39.3596	28.8308	29.6705	34.2862	29.5403	33.6747	34.0143	32.2497	20.3104	26.6496	23.5047	35.1882	31.2031	22.9497	19.56	HAX1	1	154272511	154275875	+	2155	protein_coding	HCLS1 associated protein X-1 [Source:HGNC Symbol;Acc:HGNC:16915]	-
ENSG00000221978	25.4541	58.9359	23.4513	26.647	58.2498	33.7239	7.96295	36.0434	46.3944	8.8018	13.0958	18.3201	16.4069	27.7554	15.6259	36.6177	31.9295	55.3642	CCNL2	1	1385711	1399328	-	6850	protein_coding	cyclin L2 [Source:HGNC Symbol;Acc:HGNC:20570]	-
ENSG00000101443	0.582974	0.109779	1.83865	0.589197	5.36735	0.656682	0	0.0811687	0.560453	0.2734	41.7499	187.601	54.9029	98.6776	55.4156	5.76773	33.5013	52.759	WFDC2	20	45469706	45481532	+	1382	protein_coding	WAP four-disulfide core domain 2 [Source:HGNC Symbol;Acc:HGNC:15939]	-
ENSG00000132824	36.6735	20.7123	32.6091	38.8907	22.9737	31.1303	41.9581	32.9962	25.2037	54.1038	25.6932	27.0458	29.454	19.3729	31.2909	24.5388	20.3126	24.0505	SERINC3	20	44496221	44522109	-	4683	protein_coding	serine incorporator 3 [Source:HGNC Symbol;Acc:HGNC:11699]	-
ENSG00000214194	45.4677	30.4335	38.6042	49.9614	33.1448	21.0174	32.3763	46.2072	33.3726	23.0883	32.9553	19.4296	23.9043	20.0133	26.8754	29.9139	15.5791	16.3849	SMIM30	7	113116718	113118613	-	1896	protein_coding	small integral membrane protein 30 [Source:HGNC Symbol;Acc:HGNC:48953]	-
ENSG00000132561	23.7258	42.9123	58.8293	24.4684	36.3084	27.9652	32.4893	42.8605	36.9101	54.4208	11.7396	12.7202	11.7944	14.893	19.7298	59.4169	9.0115	18.4857	MATN2	8	97868840	98036716	+	6933	protein_coding	matrilin 2 [Source:HGNC Symbol;Acc:HGNC:6908]	-
ENSG00000105058	38.9344	23.1401	32.4236	32.7093	28.8521	30.7937	38.6962	31.7664	24.347	35.5726	31.7284	31.1137	27.058	20.5134	34.6874	29.4448	23.2416	22.9891	FAM32A	19	16185380	16192046	+	1921	protein_coding	family with sequence similarity 32 member A [Source:HGNC Symbol;Acc:HGNC:24563]	-
ENSG00000129353	27.3139	20.2731	16.4089	16.2745	12.0139	27.886	23.5804	16.6349	11.8453	18.8444	61.1249	34.3588	46.3138	60.5665	54.0674	10.4622	54.1148	25.5517	SLC44A2	19	10602457	10644559	+	5216	protein_coding	solute carrier family 44 member 2 [Source:HGNC Symbol;Acc:HGNC:17292]	-
ENSG00000184752	48.3846	24.3244	43.6392	49.3497	26.6464	28.592	36.5701	38.7205	30.7586	31.4643	25.8004	15.5557	25.4601	18.5645	24.2816	33.5855	18.5228	17.0154	NDUFA12	12	94897055	95003770	-	1815	protein_coding	NADH:ubiquinone oxidoreductase subunit A12 [Source:HGNC Symbol;Acc:HGNC:23987]	-
ENSG00000119729	46.368	27.9626	37.784	56.6029	31.54	37.6167	56.8487	51.1698	33.4471	46.9071	11.4355	11.52	14.6977	8.31088	13.3491	22.069	8.1619	20.955	RHOQ	2	46541806	46583121	+	4619	protein_coding	ras homolog family member Q [Source:HGNC Symbol;Acc:HGNC:17736]	-
ENSG00000101365	33.2688	23.0693	37.1807	37.9327	18.6092	33.3291	43.044	29.8682	32.8888	52.9046	28.4853	19.3337	25.78	23.2854	23.746	26.5533	25.7389	21.6648	IDH3B	20	2658395	2664219	-	2567	protein_coding	isocitrate dehydrogenase 3 (NAD(+)) beta [Source:HGNC Symbol;Acc:HGNC:5385]	-
ENSG00000182809	36.9911	28.992	16.7208	19.9205	11.1273	22.6683	27.3287	21.4285	19.0061	18.7028	50.1537	33.7911	33.6926	55.7647	60.6829	10.9228	38.5685	29.871	CRIP2	14	105472962	105480170	+	4837	protein_coding	cysteine rich protein 2 [Source:HGNC Symbol;Acc:HGNC:2361]	-
ENSG00000138495	45.0995	33.3882	49.7348	48.6425	32.9492	25.3359	28.4945	40.0515	35.6879	27.5104	27.7624	13.3843	22.005	17.8167	26.6762	33.6877	12.6376	14.8637	COX17	3	119654513	119677454	-	2172	protein_coding	cytochrome c oxidase copper chaperone COX17 [Source:HGNC Symbol;Acc:HGNC:2264]	-
ENSG00000106244	34.0165	25.3565	38.5232	37.5418	23.6617	26.8265	40.2672	30.7558	21.7947	35.3479	28.5182	30.2971	28.1183	24.45	36.7119	23.346	24.1039	25.6757	PDAP1	7	99392048	99408829	-	2854	protein_coding	PDGFA associated protein 1 [Source:HGNC Symbol;Acc:HGNC:14634]	-
ENSG00000152661	15.2258	25.219	39.9856	29.0271	25.9238	13.5128	92.6227	38.8488	19.6041	99.398	3.29398	18.2482	17.514	4.09946	7.30299	57.5637	3.58708	23.4515	GJA1	6	121435577	121449727	+	3413	protein_coding	gap junction protein alpha 1 [Source:HGNC Symbol;Acc:HGNC:4274]	-
ENSG00000203760	89.4344	29.9611	53.0888	69.4776	33.6641	37.9826	26.2318	44.9406	22.9328	49.4959	2.62959	2.69133	10.6843	2.06068	4.23509	43.6407	1.77218	9.42429	CENPW	6	126340174	126348875	+	795	protein_coding	centromere protein W [Source:HGNC Symbol;Acc:HGNC:21488]	-
ENSG00000125648	42.6546	25.4262	49.5654	56.9073	49.2049	47.0331	29.697	29.9542	45.8471	35.8143	16.2725	10.4054	18.0942	11.4177	17.4885	10.7892	15.1576	22.3394	SLC25A23	19	6436079	6465203	-	4859	protein_coding	solute carrier family 25 member 23 [Source:HGNC Symbol;Acc:HGNC:19375]	-
ENSG00000178913	22.2647	20.1691	26.6521	26.7636	11.6373	19.9971	39.5486	25.6648	19.9112	48.6249	42.5491	41.235	34.5691	26.1628	35.064	43.1212	29.0637	20.804	TAF7	5	141260225	141320821	-	2723	protein_coding	TATA-box binding protein associated factor 7 [Source:HGNC Symbol;Acc:HGNC:11541]	-
ENSG00000108946	21.3987	20.7668	24.5868	18.4338	15.477	22.679	34.2227	23.3938	18.8847	44.7184	50.4199	35.3298	44.2073	32.0992	43.9753	38.1143	26.4243	18.5392	PRKAR1A	17	68511780	68551319	+	6821	protein_coding	protein kinase cAMP-dependent type I regulatory subunit alpha [Source:HGNC Symbol;Acc:HGNC:9388]	-
ENSG00000177156	40.6186	17.6368	34.9581	32.4263	21.1496	20.8935	42.9077	31.7674	27.1631	42.0859	31.3056	28.1401	31.3461	25.9472	37.292	17.9389	29.5697	20.3719	TALDO1	11	747329	765024	+	3005	protein_coding	transaldolase 1 [Source:HGNC Symbol;Acc:HGNC:11559]	-
ENSG00000198816	36.1169	37.2502	50.5333	43.5865	61.8366	53.1545	27.4203	38.711	36.9174	20.7403	14.1681	14.77	17.6164	12.519	19.3091	10.1007	16.3428	22.169	ZNF358	19	7515292	7521026	+	2069	protein_coding	zinc finger protein 358 [Source:HGNC Symbol;Acc:HGNC:16838]	zf-C2H2
ENSG00000135052	14.592	24.3359	30.8342	17.8096	43.6824	22.8233	21.0572	28.2094	13.7374	15.2635	86.5028	18.4383	39.2639	31.5575	41.8946	25.2403	46.4819	11.3538	GOLM1	9	86026146	86100173	-	4233	protein_coding	golgi membrane protein 1 [Source:HGNC Symbol;Acc:HGNC:15451]	-
ENSG00000067829	43.4662	26.9329	36.0861	66.8319	36.9546	48.0383	27.0292	31.8937	37.3666	34.6271	14.5335	15.5786	21.9071	16.7525	17.4042	16.5118	16.2716	24.8405	IDH3G	X	153785766	153794523	-	2717	protein_coding	isocitrate dehydrogenase 3 (NAD(+)) gamma [Source:HGNC Symbol;Acc:HGNC:5386]	-
ENSG00000278133	36.7667	40.3366	37.7102	45.327	41.0523	58.2761	17.5743	25.8923	37.5136	19.7773	25.01	15.0122	21.884	22.6655	20.0078	21.8308	21.7849	24.5747	AC135050.6	16	31122235	31124064	+	756	sense_intronic	novel transcript, sense intronic to KAT8	-
ENSG00000113328	22.5966	25.3183	35.3118	38.1799	22.8089	15.7225	53.1083	48.5875	28.1352	40.7094	21.0823	26.7571	35.1543	12.6423	24.2496	45.5839	18.8931	18.0024	CCNG1	5	163437569	163446151	+	3096	protein_coding	cyclin G1 [Source:HGNC Symbol;Acc:HGNC:1592]	-
ENSG00000126803	37.829	11.9841	28.5366	34.016	7.20067	15.738	9.83982	12.8059	12.2007	20.6583	77.5687	7.2624	24.1066	54.2634	117.702	5.70487	42.8048	12.2522	HSPA2	14	64535905	64546173	+	5777	protein_coding	heat shock protein family A (Hsp70) member 2 [Source:HGNC Symbol;Acc:HGNC:5235]	-
ENSG00000111678	34.499	38.6985	49.5876	34.2661	38.0166	34.0794	23.2186	32.05	25.6994	22.0571	22.1476	24.9822	22.1122	16.9654	31.5537	51.1245	16.6783	14.7055	C12orf57	12	6942978	6946003	+	1806	protein_coding	chromosome 12 open reading frame 57 [Source:HGNC Symbol;Acc:HGNC:29521]	-
ENSG00000104325	31.301	20.6207	25.6775	48.2943	21.4556	26.6777	81.1085	52.3292	23.8186	42.7106	26.8907	14.8943	26.2265	16.5391	14.6444	20.8639	20.6686	17.3516	DECR1	8	90001405	90052092	+	3507	protein_coding	2,4-dienoyl-CoA reductase 1 [Source:HGNC Symbol;Acc:HGNC:2753]	-
ENSG00000196821	37.4274	21.3464	36.5918	40.9431	22.2188	50.3793	54.52	36.7509	27.9508	63.8924	14.6381	18.3457	21.2966	11.3343	19.6106	16.9086	15.6283	22.2853	C6orf106	6	34587288	34696859	-	4551	protein_coding	chromosome 6 open reading frame 106 [Source:HGNC Symbol;Acc:HGNC:21215]	-
ENSG00000167969	36.6421	22.0643	31.5437	46.8948	28.3862	39.6954	36.1945	31.8766	30.0113	29.5255	36.5299	16.0222	31.4197	26.4647	31.5902	13.9195	27.6711	15.1058	ECI1	16	2239395	2252300	-	3234	protein_coding	enoyl-CoA delta isomerase 1 [Source:HGNC Symbol;Acc:HGNC:2703]	-
ENSG00000173153	28.9607	17.3912	25.854	39.0787	20.9164	56.7175	34.1539	26.674	26.2311	42.7006	35.8922	17.7917	33.7025	29.4302	30.085	11.5683	29.3578	24.506	ESRRA	11	64305572	64316743	+	3030	protein_coding	estrogen related receptor alpha [Source:HGNC Symbol;Acc:HGNC:3471]	ESR-like
ENSG00000134686	27.9758	24.9756	33.4483	26.2694	25.9074	37.9929	33.557	34.8927	27.2094	43.7783	29.6105	28.9457	30.8468	23.4511	31.9089	17.4395	24.2276	28.4914	PHC2	1	33323623	33431052	-	4975	protein_coding	polyhomeotic homolog 2 [Source:HGNC Symbol;Acc:HGNC:3183]	-
ENSG00000125844	41.9956	27.5824	44.6439	42.6675	31.1415	37.8356	28.6805	38.6747	30.6694	26.888	26.822	22.7768	25.3008	22.7093	22.9591	9.23831	22.9617	27.0706	RRBP1	20	17613678	17682295	-	6980	protein_coding	ribosome binding protein 1 [Source:HGNC Symbol;Acc:HGNC:10448]	-
ENSG00000103502	38.7489	23.7115	40.1119	34.4483	25.0394	48.1868	28.7802	31.0717	26.52	39.4966	27.8037	22.1725	25.9082	22.5578	29.8642	18.4254	26.5924	20.7929	CDIPT	16	29858357	29863736	-	3325	protein_coding	CDP-diacylglycerol--inositol 3-phosphatidyltransferase [Source:HGNC Symbol;Acc:HGNC:1769]	-
ENSG00000148362	34.4782	46.4649	31.6	36.5836	50.7462	44.903	20.2996	34.6291	29.289	7.50229	20.0505	38.0408	12.0099	22.4461	21.4316	30.0148	21.0748	28.2954	PAXX	9	136992418	136993984	+	1367	protein_coding	PAXX, non-homologous end joining factor [Source:HGNC Symbol;Acc:HGNC:27849]	-
ENSG00000123143	30.7417	27.6243	34.4191	30.5248	34.6308	39.1917	32.801	30.6497	28.5484	29.1096	26.2034	27.8312	23.0515	31.5494	43.477	12.3802	21.38	24.7831	PKN1	19	14433053	14471867	+	4606	protein_coding	protein kinase N1 [Source:HGNC Symbol;Acc:HGNC:9405]	-
ENSG00000137033	57.5007	33.3774	29.4543	84.0428	36.1375	23.0796	34.9663	36.8457	51.7963	32.2236	0.671206	10.1234	10.2887	0.993607	1.82286	55.7927	0.940879	28.7994	IL33	9	6215786	6257983	+	3253	protein_coding	interleukin 33 [Source:HGNC Symbol;Acc:HGNC:16028]	-
ENSG00000116560	28.7868	39.2803	25.68	25.101	33.5703	25.2087	20.8884	29.0332	36.987	21.1663	24.1414	26.2694	25.9665	35.0529	29.0984	33.8187	37.5848	30.8011	SFPQ	1	35176378	35193148	-	7426	protein_coding	splicing factor proline and glutamine rich [Source:HGNC Symbol;Acc:HGNC:10774]	-
ENSG00000105202	32.0402	34.7227	39.4729	30.1963	36.4568	21.6414	24.4826	29.244	26.9798	23.4488	29.5454	40.0917	23.0742	19.5608	42.2507	35.9061	18.6459	20.6314	FBL	19	39834458	39846414	-	2173	protein_coding	fibrillarin [Source:HGNC Symbol;Acc:HGNC:3599]	-
ENSG00000229119	34.3661	50.5713	45.589	39.3334	49.0824	15.1023	35.9163	40.6873	31.305	17.1995	14.3305	28.6963	19.3388	10.0561	29.2996	42.2626	10.3752	14.2475	AC026403.1	5	166382305	166382599	+	295	processed_pseudogene	60S acidic ribosomal protein (RPLP0) pseudogene	-
ENSG00000177383	27.0855	26.3057	37.1628	31.3564	22.2711	21.4831	27.6187	28.1124	24.1089	37.7443	40.578	32.6388	31.8491	27.2535	39.4093	21.3005	30.4381	19.9941	MAGEF1	3	184710367	184712002	-	1636	protein_coding	MAGE family member F1 [Source:HGNC Symbol;Acc:HGNC:29639]	-
ENSG00000076706	41.3491	32.7058	39.9896	35.1073	10.7297	40.8292	73.7041	32.3966	25.1182	81.4019	11.6922	8.6797	20.0789	13.8223	9.71597	12.2887	9.2229	27.026	MCAM	11	119308529	119321521	-	7422	protein_coding	melanoma cell adhesion molecule [Source:HGNC Symbol;Acc:HGNC:6934]	-
ENSG00000114353	38.2386	27.6985	35.8569	37.5824	30.4541	32.7856	43.5068	37.2964	28.9179	38.8705	17.2586	31.7202	22.2315	19.8811	22.8401	16.7783	15.7305	28.028	GNAI2	3	50226292	50259355	+	7650	protein_coding	G protein subunit alpha i2 [Source:HGNC Symbol;Acc:HGNC:4385]	-
ENSG00000125166	41.1998	20.3306	30.4778	36.036	24.3763	36.9797	19.0091	17.4548	42.5574	33.1659	43.1871	17.18	30.7347	32.9548	33.3325	16.3627	31.8764	18.4389	GOT2	16	58707131	58734357	-	3766	protein_coding	glutamic-oxaloacetic transaminase 2 [Source:HGNC Symbol;Acc:HGNC:4433]	-
ENSG00000172403	45.3048	34.7664	56.9548	38.1345	18.0468	27.6892	26.5399	12.8569	52.9066	113.519	2.32048	7.05288	16.2558	2.47349	3.16538	39.0958	2.04936	26.2854	SYNPO2	4	118850688	119061247	+	14034	protein_coding	synaptopodin 2 [Source:HGNC Symbol;Acc:HGNC:17732]	-
ENSG00000146859	62.5239	17.8628	35.2617	60.2283	36.5079	33.4222	52.5212	47.843	28.8243	42.2855	11.9303	15.424	14.1411	6.81476	11.6669	15.2648	11.2161	21.5948	TMEM140	7	135148072	135166215	+	2313	protein_coding	transmembrane protein 140 [Source:HGNC Symbol;Acc:HGNC:21870]	-
ENSG00000156411	40.1262	24.908	45.7514	42.8992	30.7567	32.1799	36.2788	38.9739	30.2002	32.1965	21.48	18.1286	24.8727	14.7287	21.4841	36.2686	16.7015	17.177	ATP5MPL	14	103912288	103928269	-	3415	protein_coding	ATP synthase membrane subunit 6.8PL [Source:HGNC Symbol;Acc:HGNC:1188]	-
ENSG00000185551	25.3214	33.3071	35.9919	27.5668	31.2004	20.2841	26.6629	20.0766	30.0992	45.6619	31.0426	33.0036	24.4858	34.2958	23.4106	28.9695	28.0482	25.5384	NR2F2	15	96325938	96340263	+	6459	protein_coding	nuclear receptor subfamily 2 group F member 2 [Source:HGNC Symbol;Acc:HGNC:7976]	RXR-like
ENSG00000090273	35.8734	25.8523	40.0369	35.7099	27.302	27.9344	29.0702	27.4743	29.4773	30.5038	30.9381	27.5724	27.9432	24.5879	38.0938	16.6921	26.5025	23.141	NUDC	1	26900238	26946862	+	2856	protein_coding	nuclear distribution C, dynein complex regulator [Source:HGNC Symbol;Acc:HGNC:8045]	-
ENSG00000204387	31.3142	26.6756	44.357	40.1258	18.5833	22.3551	37.1346	32.1702	18.592	35.3353	25.7688	31.5856	28.8608	20.7739	16.4345	46.6136	19.3412	28.0045	C6orf48	6	31834608	31839766	+	1801	protein_coding	chromosome 6 open reading frame 48 [Source:HGNC Symbol;Acc:HGNC:19078]	-
ENSG00000242372	26.1394	22.8827	35.0348	35.6545	23.0671	20.689	33.9246	27.8203	20.4568	30.8109	32.6702	35.1344	35.7166	25.1924	38.6366	26.5349	32.1697	21.1758	EIF6	20	35278911	35284985	-	1631	protein_coding	eukaryotic translation initiation factor 6 [Source:HGNC Symbol;Acc:HGNC:6159]	-
ENSG00000120509	42.7994	30.4589	43.2007	49.8811	35.6133	26.0599	34.8915	42.8005	38.9219	28.6741	17.9754	13.3229	19.112	14.8119	17.4963	35.6536	13.4621	18.4532	PDZD11	X	70286595	70290514	-	1393	protein_coding	PDZ domain containing 11 [Source:HGNC Symbol;Acc:HGNC:28034]	-
ENSG00000123933	34.9774	30.5233	37.9688	36.1776	33.9838	64.7588	27.6725	33.3919	31.4025	30.3076	17.6728	17.8329	19.92	23.255	20.1564	13.8129	18.6193	29.8093	MXD4	4	2247432	2262294	-	7058	protein_coding	MAX dimerization protein 4 [Source:HGNC Symbol;Acc:HGNC:13906]	bHLH
ENSG00000152558	17.7997	22.9296	28.3406	17.7561	20.1891	17.0084	23.7413	20.0115	16.9241	26.7736	48.9053	56.042	40.4992	30.9375	49.0627	39.7048	27.8718	17.1584	TMEM123	11	102396332	102470384	-	4647	protein_coding	transmembrane protein 123 [Source:HGNC Symbol;Acc:HGNC:30138]	-
ENSG00000042493	15.5808	7.23556	17.4493	17.2047	11.017	13.0701	36.2335	23.1493	7.88464	19.421	65.8617	37.0393	38.0038	57.8978	85.7969	10.1722	42.358	15.8416	CAPG	2	85394748	85418432	-	2607	protein_coding	capping actin protein, gelsolin like [Source:HGNC Symbol;Acc:HGNC:1474]	-
ENSG00000184489	60.5349	27.7905	46.4873	23.2554	83.0202	60.3934	9.04128	7.33018	72.5444	34.146	7.92836	12.0446	17.6923	10.4959	7.17889	14.5101	7.36248	19.3728	PTP4A3	8	141391993	141432454	+	2877	protein_coding	protein tyrosine phosphatase type IVA, member 3 [Source:HGNC Symbol;Acc:HGNC:9636]	-
ENSG00000095713	29.6675	9.82105	41.2707	50.6102	16.8521	23.4529	75.5143	160.401	22.7724	26.6467	2.5758	1.6495	4.95974	3.97531	1.51337	7.44943	4.79943	36.4827	CRTAC1	10	97865000	98030828	-	3553	protein_coding	cartilage acidic protein 1 [Source:HGNC Symbol;Acc:HGNC:14882]	-
ENSG00000147027	55.861	24.1879	33.1282	25.1405	15.0183	43.6734	18.1012	12.2441	42.4735	74.0153	23.6749	15.2826	26.9877	15.0502	35.6253	31.0686	11.3486	17.3995	TMEM47	X	34627064	34657288	-	4054	protein_coding	transmembrane protein 47 [Source:HGNC Symbol;Acc:HGNC:18515]	-
ENSG00000156261	32.3136	27.2307	37.1558	30.8713	21.083	20.3974	34.2802	26.8938	31.7073	34.6383	31.55	29.2778	31.7605	25.1401	29.315	35.8025	20.4595	20.0005	CCT8	21	29055805	29073797	-	3341	protein_coding	chaperonin containing TCP1 subunit 8 [Source:HGNC Symbol;Acc:HGNC:1623]	-
ENSG00000133315	39.9814	21.7633	32.6642	47.9116	37.4967	55.2523	26.782	32.7289	45.2914	26.7947	21.8381	8.66138	31.861	21.0256	17.6328	10.909	21.1864	19.9739	MACROD1	11	63998558	64166106	-	2089	protein_coding	MACRO domain containing 1 [Source:HGNC Symbol;Acc:HGNC:29598]	-
ENSG00000084733	31.3045	26.184	28.6581	34.2923	25.3807	19.5863	36.9461	33.3807	27.8458	42.4413	29.2349	30.6288	32.6281	21.0348	29.2573	30.6493	20.9662	18.2353	RAB10	2	26034107	26137454	+	3631	protein_coding	RAB10, member RAS oncogene family [Source:HGNC Symbol;Acc:HGNC:9759]	-
ENSG00000173141	38.1432	26.6816	45.4471	39.4265	36.5401	30.7091	25.484	27.7691	30.2677	25.4264	27.1373	21.0821	26.3318	20.7387	31.9949	29.3018	20.2895	15.4588	MRPL57	13	21176645	21179084	+	2246	protein_coding	mitochondrial ribosomal protein L57 [Source:HGNC Symbol;Acc:HGNC:14514]	-
ENSG00000129250	48.6015	21.3071	41.5917	35.4938	24.9054	46.0979	35.7528	21.716	29.2902	59.0035	23.2063	17.6024	26.4635	18.1029	20.4933	9.71304	18.8836	19.4524	KIF1C	17	4997948	5028401	+	8580	protein_coding	kinesin family member 1C [Source:HGNC Symbol;Acc:HGNC:6317]	-
ENSG00000213326	30.9344	31.8444	43.4677	45.8548	29.4682	25.3423	34.9178	37.8065	24.2999	17.2247	21.0083	35.7977	21.4179	13.827	28.8993	39.1505	14.2596	21.621	RPS7P11	17	46721582	46722167	-	586	processed_pseudogene	ribosomal protein S7 pseudogene 11 [Source:HGNC Symbol;Acc:HGNC:35841]	-
ENSG00000178980	50.3958	28.9816	47.6158	37.2878	30.5336	41.6044	21.6738	21.6419	37.5308	29.0148	20.3361	19.9456	25.4589	16.79	20.8039	26.8641	16.3172	24.0364	SELENOW	19	47778572	47784686	+	5261	protein_coding	selenoprotein W [Source:HGNC Symbol;Acc:HGNC:10752]	-
ENSG00000117118	25.1431	15.0358	32.0452	36.6565	14.1243	20.0729	54.261	34.0581	22.385	51.8723	31.738	15.7941	36.792	21.9585	26.5957	30.7573	26.2841	20.5353	SDHB	1	17018722	17054170	-	2462	protein_coding	succinate dehydrogenase complex iron sulfur subunit B [Source:HGNC Symbol;Acc:HGNC:10681]	-
ENSG00000164548	33.3022	42.603	29.6307	32.0752	50.2275	32.8511	17.6821	37.8384	34.7891	17.4704	21.5632	22.1057	15.793	26.9615	16.6507	32.8725	25.7558	25.9002	TRA2A	7	23504780	23532041	-	3516	protein_coding	transformer 2 alpha homolog [Source:HGNC Symbol;Acc:HGNC:16645]	-
ENSG00000173641	41.1249	22.0651	49.6124	25.5284	15.5714	96.2397	11.8428	19.1645	59.8852	57.0141	18.3923	1.43941	10.7647	10.4067	25.8201	14.9107	5.144	30.8772	HSPB7	1	16014028	16019594	-	3910	protein_coding	heat shock protein family B (small) member 7 [Source:HGNC Symbol;Acc:HGNC:5249]	-
ENSG00000049245	33.2777	21.6577	31.3697	28.5191	22.7905	25.8869	39.5262	27.4951	34.5394	47.5624	25.13	24.6722	29.053	21.3844	29.5687	33.3421	19.5209	20.3926	VAMP3	1	7771269	7781432	+	2760	protein_coding	vesicle associated membrane protein 3 [Source:HGNC Symbol;Acc:HGNC:12644]	-
ENSG00000008853	76.6182	14.5642	12.5836	66.0099	13.9876	139.365	14.3643	47.4528	33.0137	18.9412	2.01921	3.58392	7.90908	2.09272	1.55797	3.65749	2.23714	55.2476	RHOBTB2	8	22987417	23020199	+	6580	protein_coding	Rho related BTB domain containing 2 [Source:HGNC Symbol;Acc:HGNC:18756]	-
ENSG00000158864	30.5595	14.7373	28.2771	33.0932	14.4217	29.0723	53.1174	22.6466	27.6402	71.0053	29.3112	14.6355	32.162	22.671	19.3014	19.5976	29.3246	23.1963	NDUFS2	1	161197104	161214395	+	3658	protein_coding	NADH:ubiquinone oxidoreductase core subunit S2 [Source:HGNC Symbol;Acc:HGNC:7708]	-
ENSG00000132589	32.4023	21.2381	31.5639	29.5751	28.5856	44.5656	25.1731	23.1344	27.647	31.3248	30.3997	32.7098	24.7587	34.5215	34.4957	13.402	27.9901	21.1626	FLOT2	17	28879335	28897679	-	3336	protein_coding	flotillin 2 [Source:HGNC Symbol;Acc:HGNC:3758]	-
ENSG00000013364	50.8819	27.5379	43.3962	47.4914	41.7641	29.7715	26.0079	29.19	32.7736	30.7109	13.2613	29.2743	23.3797	16.8642	14.5331	13.0299	15.4979	29.2216	MVP	16	29820394	29848039	+	6141	protein_coding	major vault protein [Source:HGNC Symbol;Acc:HGNC:7531]	-
ENSG00000116688	33.6573	22.0569	32.1532	36.4591	22.2426	41.459	35.8363	25.4103	34.6245	67.9353	24.307	15.0866	27.354	19.0177	17.6534	15.2682	20.7107	22.2805	MFN2	1	11980181	12013514	+	4973	protein_coding	mitofusin 2 [Source:HGNC Symbol;Acc:HGNC:16877]	-
ENSG00000108179	23.7021	11.858	21.4158	49.4581	12.2944	32.5817	69.2886	37.147	28.2082	66.4115	27.5713	9.88014	28.8258	20.1017	16.1055	9.61159	21.8747	27.0168	PPIF	10	79347469	79355337	+	2674	protein_coding	peptidylprolyl isomerase F [Source:HGNC Symbol;Acc:HGNC:9259]	-
ENSG00000168936	28.5371	21.0395	27.0087	37.299	19.654	60.2834	33.6326	28.2556	23.1779	42.3411	32.7972	18.4053	28.6186	27.0523	24.4399	13.5237	26.9446	19.7853	TMEM129	4	1715952	1721358	-	3442	protein_coding	transmembrane protein 129 [Source:HGNC Symbol;Acc:HGNC:25137]	-
ENSG00000134107	41.3649	21.3383	30.3499	7.19764	28.3329	13.6108	40.2514	15.5385	22.9347	10.0583	43.4897	12.5708	32.4623	66.6632	27.9354	17.1652	13.7251	67.5013	BHLHE40	3	4979116	4985323	+	3837	protein_coding	basic helix-loop-helix family member e40 [Source:HGNC Symbol;Acc:HGNC:1046]	bHLH
ENSG00000105698	37.0946	28.3698	40.1241	42.3414	31.1326	46.8329	37.1543	34.2053	33.905	32.7219	19.3817	19.105	18.2536	17.6678	21.3511	12.8876	17.2471	22.4488	USF2	19	35268978	35279821	+	4952	protein_coding	upstream transcription factor 2, c-fos interacting [Source:HGNC Symbol;Acc:HGNC:12594]	bHLH
ENSG00000044115	23.2592	20.5664	29.3385	23.0541	18.3064	18.388	35.0199	27.4658	23.1304	41.4639	41.3106	29.8411	32.9935	32.3777	38.7904	23.0541	31.3281	21.5438	CTNNA1	5	138610967	138935034	+	8830	protein_coding	catenin alpha 1 [Source:HGNC Symbol;Acc:HGNC:2509]	-
ENSG00000057608	22.2576	20.9157	25.5556	23.7235	16.8328	15.5678	44.9535	26.5488	17.2108	41.4096	33.1746	49.0389	37.2974	22.9892	32.0727	35.4367	24.3212	21.568	GDI2	10	5765223	5842132	-	4033	protein_coding	GDP dissociation inhibitor 2 [Source:HGNC Symbol;Acc:HGNC:4227]	-
ENSG00000112977	20.0758	17.1079	26.9589	16.4946	13.2772	17.0849	20.1488	22.2949	16.9647	24.1539	63.5125	28.5085	35.6453	38.9941	78.6303	16.1756	40.3286	14.3538	DAP	5	10679230	10761272	-	3361	protein_coding	death associated protein [Source:HGNC Symbol;Acc:HGNC:2672]	-
ENSG00000244734	41.4471	29.9394	13.7355	7.85754	1.36522	97.7511	24.3757	7.61312	9.22948	92.3487	17.136	26.1815	77.2909	14.0572	8.36252	31.1906	5.36491	5.32523	HBB	11	5225464	5229395	-	1304	protein_coding	hemoglobin subunit beta [Source:HGNC Symbol;Acc:HGNC:4827]	-
ENSG00000117335	18.9976	23.5492	20.5471	24.3277	27.2856	17.8024	20.7939	35.1739	45.3969	20.0027	42.903	25.1688	31.1045	34.9109	40.3206	30.5005	30.1882	21.363	CD46	1	207752057	207795513	+	8708	protein_coding	CD46 molecule [Source:HGNC Symbol;Acc:HGNC:6953]	-
ENSG00000179163	15.481	10.6726	17.3787	18.033	13.3351	11.4868	26.9755	25.2353	16.2413	22.6245	75.2102	26.6536	34.125	65.431	66.0619	12.5307	39.1363	13.7181	FUCA1	1	23845077	23868294	-	2047	protein_coding	alpha-L-fucosidase 1 [Source:HGNC Symbol;Acc:HGNC:4006]	-
ENSG00000179094	29.9259	43.1467	29.9701	21.2231	21.8907	26.1932	28.3101	28.4283	46.1531	29.7637	10.7548	12.4354	29.3042	44.0428	15.0929	16.9299	13.502	63.1488	PER1	17	8140472	8156506	-	7002	protein_coding	period circadian regulator 1 [Source:HGNC Symbol;Acc:HGNC:8845]	-
ENSG00000167671	33.4232	20.0176	35.9871	30.2682	26.1215	44.3562	36.0483	27.6663	29.8975	34.8727	26.9489	24.2133	27.9269	20.6317	29.8465	14.9947	25.6588	20.8894	UBXN6	19	4444999	4457822	-	5275	protein_coding	UBX domain protein 6 [Source:HGNC Symbol;Acc:HGNC:14928]	-
ENSG00000241685	72.9276	27.0962	39.5462	39.7616	36.8824	88.8125	19.879	29.6147	30.5303	21.1912	10.839	9.44764	14.1721	9.59725	13.3157	22.5739	8.47172	15.0725	ARPC1A	7	99325910	99366262	+	2053	protein_coding	actin related protein 2/3 complex subunit 1A [Source:HGNC Symbol;Acc:HGNC:703]	-
ENSG00000167641	54.8832	54.3111	55.3282	30.0175	22.0207	31.1654	32.493	19.8418	44.1395	17.1892	15.3203	17.1984	16.9345	14.2771	18.0787	26.314	10.6162	29.3	PPP1R14A	19	38251237	38256591	-	1501	protein_coding	protein phosphatase 1 regulatory inhibitor subunit 14A [Source:HGNC Symbol;Acc:HGNC:14871]	-
ENSG00000075426	20.6849	24.5684	24.2985	17.8528	18.7965	11.9196	29.3576	31.4097	24.4748	26.8716	37.2713	17.0273	27.3764	89.3454	39.8254	21.1681	11.4854	35.227	FOSL2	2	28392448	28417312	+	7157	protein_coding	FOS like 2, AP-1 transcription factor subunit [Source:HGNC Symbol;Acc:HGNC:3798]	TF_bZIP
ENSG00000130741	19.608	25.6789	23.2588	27.3808	21.3814	16.206	40.075	26.8484	22.8746	43.6076	30.0519	39.1986	33.9032	19.4986	32.001	37.9101	25.7883	22.9126	EIF2S3	X	24054716	24077971	+	3472	protein_coding	eukaryotic translation initiation factor 2 subunit gamma [Source:HGNC Symbol;Acc:HGNC:3267]	-
ENSG00000143321	17.5691	15.1511	21.3151	20.094	12.8348	18.2631	35.7615	19.0054	15.7661	32.6601	44.9302	42.1041	41.4013	36.4382	50.0509	19.0741	41.1489	24.1863	HDGF	1	156742107	156766925	-	3745	protein_coding	heparin binding growth factor [Source:HGNC Symbol;Acc:HGNC:4856]	-
ENSG00000162909	23.459	29.6802	31.2276	32.2454	24.6963	16.6658	22.7313	30.7295	31.0507	31.2308	32.3322	29.0231	38.1829	24.2334	26.6408	27.0824	32.2813	23.5145	CAPN2	1	223701593	223776018	+	8792	protein_coding	calpain 2 [Source:HGNC Symbol;Acc:HGNC:1479]	-
ENSG00000112308	29.0384	24.0256	25.6959	29.2499	26.039	26.3635	33.7796	28.7764	23.1894	31.7543	32.7687	36.4432	29.1028	30.8674	29.174	25.202	25.1843	20.1423	C6orf62	6	24704861	24720836	-	4134	protein_coding	chromosome 6 open reading frame 62 [Source:HGNC Symbol;Acc:HGNC:20998]	-
ENSG00000117868	34.4587	23.6256	41.9808	30.2187	30.8746	37.2764	25.6526	25.7443	38.4444	52.8135	23.7974	17.2934	22.1475	17.9278	29.1403	23.6548	12.4707	18.8283	ESYT2	7	158730995	158830253	-	7098	protein_coding	extended synaptotagmin 2 [Source:HGNC Symbol;Acc:HGNC:22211]	-
ENSG00000164032	27.1414	19.6971	34.4191	30.3775	15.1768	17.0165	37.2434	27.9586	18.6528	44.016	32.2146	27.508	26.8361	22.571	46.1718	43.7967	17.4246	18.0385	H2AFZ	4	99948086	99950388	-	2303	protein_coding	H2A histone family member Z [Source:HGNC Symbol;Acc:HGNC:4741]	-
ENSG00000180879	41.8047	29.836	34.4445	35.7611	35.4497	29.0648	26.2712	34.7767	22.3394	18.545	22.3879	38.1935	23.339	17.2766	27.0201	34.3313	17.0302	18.1943	SSR4	X	153793516	153798505	+	4590	protein_coding	signal sequence receptor subunit 4 [Source:HGNC Symbol;Acc:HGNC:11326]	-
ENSG00000144579	27.7959	24.403	26.7727	24.8484	24.417	38.747	28.5695	22.0933	24.3893	24.345	33.4538	31.7829	30.8292	33.224	30.6382	17.8139	35.4166	26.3265	CTDSP1	2	218398256	218405941	+	4727	protein_coding	CTD small phosphatase 1 [Source:HGNC Symbol;Acc:HGNC:21614]	-
ENSG00000143653	12.151	8.58682	10.4738	13.0669	6.63827	8.27339	23.2481	35.8082	11.5686	25.7485	75.5954	14.4947	18.2086	45.7273	141.662	15.6575	29.1338	9.68574	SCCPDH	1	246724047	246768137	+	2503	protein_coding	saccharopine dehydrogenase (putative) [Source:HGNC Symbol;Acc:HGNC:24275]	-
ENSG00000172428	40.2703	24.1076	50.2737	49.8852	31.2859	26.7862	35.9619	36.6123	23.0841	22.5809	19.7535	21.9449	21.2331	13.8758	26.0503	31.5749	14.8201	15.4747	COPS9	2	240126563	240136807	-	2039	protein_coding	COP9 signalosome subunit 9 [Source:HGNC Symbol;Acc:HGNC:21314]	-
ENSG00000132170	33.725	17.9648	17.4516	55.362	15.6892	35.8029	97.2486	68.7892	32.7134	64.8914	4.5995	1.94873	7.6038	4.61806	4.62077	9.28407	4.17796	28.9858	PPARG	3	12287368	12434356	+	4535	protein_coding	peroxisome proliferator activated receptor gamma [Source:HGNC Symbol;Acc:HGNC:9236]	THR-like
ENSG00000205544	38.5552	29.2555	43.2166	45.2053	39.8687	39.9096	31.7963	42.0459	19.8882	23.8201	16.0986	17.6974	22.2352	14.2788	16.9166	36.2082	12.9873	15.2498	TMEM256	17	7402975	7404137	-	707	protein_coding	transmembrane protein 256 [Source:HGNC Symbol;Acc:HGNC:28618]	-
ENSG00000110080	74.8831	16.9892	29.5374	46.4429	40.4159	77.4957	13.6979	14.5338	24.2058	32.6159	27.7696	5.21906	14.5658	13.9326	18.5365	8.89177	31.1079	14.038	ST3GAL4	11	126355640	126440344	+	4465	protein_coding	ST3 beta-galactoside alpha-2,3-sialyltransferase 4 [Source:HGNC Symbol;Acc:HGNC:10864]	-
ENSG00000174903	19.737	11.3389	24.1481	18.8996	5.7656	22.0337	50.5572	16.1807	21.6413	56.3437	42.4979	33.1873	37.0476	34.5919	37.6579	11.0747	34.0584	27.8009	RAB1B	11	66268533	66277492	+	2007	protein_coding	RAB1B, member RAS oncogene family [Source:HGNC Symbol;Acc:HGNC:18370]	-
ENSG00000250722	22.8637	16.0747	27.218	28.6192	15.3674	11.3427	68.1135	29.2369	21.2219	89.7909	8.61658	13.2229	23.9489	5.6825	6.71443	87.6577	10.3519	18.0662	SELENOP	5	42799880	42887392	-	5688	protein_coding	selenoprotein P [Source:HGNC Symbol;Acc:HGNC:10751]	-
ENSG00000006282	37.1108	27.2045	41.9792	54.6331	39.9834	54.3529	16.4493	29.3207	44.4313	30.2097	15.7552	12.4889	13.9794	18.6084	12.9091	15.1843	17.0315	22.4158	SPATA20	17	50543058	50555852	+	5337	protein_coding	spermatogenesis associated 20 [Source:HGNC Symbol;Acc:HGNC:26125]	-
ENSG00000143621	17.8959	19.6654	27.3607	19.4554	14.1264	19.0253	33.0313	24.171	18.3887	36.2055	42.1383	33.4014	32.375	30.3396	47.1238	39.4254	29.8607	20.0551	ILF2	1	153661788	153671048	-	2281	protein_coding	interleukin enhancer binding factor 2 [Source:HGNC Symbol;Acc:HGNC:6037]	-
ENSG00000163541	24.1081	14.9024	24.1483	31.3473	14.5238	24.0811	50.3047	26.7875	25.6199	49.4432	37.9799	14.3468	46.8387	23.1714	24.5399	21.5663	33.7673	16.2018	SUCLG1	2	84423523	84460045	-	4286	protein_coding	succinate-CoA ligase alpha subunit [Source:HGNC Symbol;Acc:HGNC:11449]	-
ENSG00000074842	36.1703	17.5704	38.4856	36.3947	12.8373	26.0096	49.8124	29.08	18.6766	35.8346	30.4262	34.871	22.8923	24.4076	29.7081	20.1279	19.8903	19.5299	MYDGF	19	4641374	4670370	-	1678	protein_coding	myeloid derived growth factor [Source:HGNC Symbol;Acc:HGNC:16948]	-
ENSG00000210151	15.5685	8.79501	0.898201	25.5689	27.5206	11.957	11.3745	5.69004	11.2253	7.04048	23.5646	3.37052	162.605	7.05861	34.9581	4.44315	85.899	54.7335	MT-TS1	MT	7446	7514	-	69	Mt_tRNA	mitochondrially encoded tRNA serine 1 (UCN) [Source:HGNC Symbol;Acc:HGNC:7497]	-
ENSG00000180992	45.9263	29.478	49.7617	46.6288	25.1845	36.821	34.1386	31.3482	22.8008	25.3844	19.1346	20.3222	20.0939	13.1584	27.7723	26.1608	13.982	14.0373	MRPL14	6	44113454	44127457	-	959	protein_coding	mitochondrial ribosomal protein L14 [Source:HGNC Symbol;Acc:HGNC:14279]	-
ENSG00000104332	0.81791	33.5442	12.1452	12.0006	27.5206	0.745145	26.1754	32.2082	2.52788	19.2168	52.4374	73.5946	53.3495	21.678	15.3786	63.8354	28.8677	25.9338	SFRP1	8	41261958	41309497	-	4761	protein_coding	secreted frizzled related protein 1 [Source:HGNC Symbol;Acc:HGNC:10776]	-
ENSG00000122203	26.1087	22.1735	32.3217	28.6077	19.2975	21.1398	26.7388	23.5334	23.8892	36.2066	36.2832	22.7707	50.6245	25.9442	34.682	24.7057	28.039	18.7048	KIAA1191	5	176346061	176361968	-	3973	protein_coding	KIAA1191 [Source:HGNC Symbol;Acc:HGNC:29209]	-
ENSG00000171603	21.8087	23.4392	30.1428	23.8206	28.9554	28.9189	27.0385	26.8841	18.1478	29.3677	38.5839	30.1849	35.6148	23.2486	45.3534	12.5515	33.8528	23.2912	CLSTN1	1	9729026	9824526	-	5683	protein_coding	calsyntenin 1 [Source:HGNC Symbol;Acc:HGNC:17447]	-
ENSG00000162366	0.840407	0.211007	0.215493	0.424689	4.37426	0.286868	0.350861	0.351035	0.621493	2.21463	21.6127	94.579	155.914	8.46739	24.0428	2.87816	152.402	30.9649	PDZK1IP1	1	47183593	47191044	-	1438	protein_coding	PDZK1 interacting protein 1 [Source:HGNC Symbol;Acc:HGNC:16887]	-
ENSG00000115875	37.1797	39.1443	30.1069	17.7818	34.1231	18.3975	17.2545	17.6652	35.8661	17.761	24.1525	24.2513	18.8206	33.1884	22.1756	48.4056	22.1112	42.1799	SRSF7	2	38743599	38751494	-	4045	protein_coding	serine and arginine rich splicing factor 7 [Source:HGNC Symbol;Acc:HGNC:10789]	-
ENSG00000182551	29.0775	20.8197	43.8959	36.7349	26.5969	30.0484	37.7093	29.4359	25.9968	45.696	24.0134	15.0917	35.046	14.4138	20.6161	24.3718	21.696	19.2599	ADI1	2	3497361	3519736	-	5560	protein_coding	acireductone dioxygenase 1 [Source:HGNC Symbol;Acc:HGNC:30576]	-
ENSG00000117448	44.3148	25.6826	29.9454	37.5914	34.4146	28.4439	31.3619	36.4992	26.4017	28.4326	15.6143	24.0092	34.2837	14.3428	16.5199	24.7377	29.1711	18.3266	AKR1A1	1	45550543	45570049	+	3121	protein_coding	aldo-keto reductase family 1 member A1 [Source:HGNC Symbol;Acc:HGNC:380]	-
ENSG00000055070	35.585	25.014	41.0866	37.28	27.8893	58.1711	30.2206	27.518	26.8846	42.4471	19.8762	20.6453	21.0315	15.3621	20.283	18.008	13.8061	18.324	SZRD1	1	16352575	16398145	+	4747	protein_coding	SUZ RNA binding domain containing 1 [Source:HGNC Symbol;Acc:HGNC:30232]	-
ENSG00000265982	21.6803	50.5713	16.7851	22.6186	56.2507	31.7981	17.5187	36.8075	44.0647	7.30939	14.5175	23.2566	14.5265	25.3669	16.2273	11.7095	27.3275	60.9131	AC103810.3	17	64778842	64778937	-	96	unprocessed_pseudogene	Rho GTPase-activating protein 27-like protein pseudogene	-
ENSG00000125970	46.9429	27.618	39.6124	46.0892	35.33	48.977	26.7726	30.7201	30.7458	28.9822	14.6361	19.1488	17.9374	14.1853	18.3471	19.1653	13.2562	20.5449	RALY	20	33993646	34108308	+	7513	protein_coding	RALY heterogeneous nuclear ribonucleoprotein [Source:HGNC Symbol;Acc:HGNC:15921]	-
ENSG00000189343	25.776	17.0671	30.8125	29.3555	13.7769	23.4522	32.8232	21.5966	22.4692	39.7339	21.3077	58.26	33.3811	18.4528	33.179	36.2245	19.642	21.3851	RPS2P46	17	19445970	19446852	-	883	processed_pseudogene	ribosomal protein S2 pseudogene 46 [Source:HGNC Symbol;Acc:HGNC:35839]	-
ENSG00000122034	35.4153	30.2147	42.7698	42.7802	33.7144	32.7154	39.7332	39.8276	29.0854	26.0083	14.3656	24.5508	16.8345	13.013	19.4244	29.3024	11.7854	16.6643	GTF3A	13	27424544	27435823	+	3001	protein_coding	general transcription factor IIIA [Source:HGNC Symbol;Acc:HGNC:4662]	zf-C2H2
ENSG00000135617	43.3756	21.4578	41.3173	50.7834	33.5298	69.4856	34.5842	36.3553	29.2185	31.9565	16.773	7.00838	13.4706	11.4547	16.0007	17.3589	10.4277	13.5507	PRADC1	2	73228006	73233238	-	1407	protein_coding	protease associated domain containing 1 [Source:HGNC Symbol;Acc:HGNC:16047]	-
ENSG00000173156	45.4317	19.349	38.6063	44.3075	15.0113	60.0675	50.476	41.7664	14.271	25.9004	22.6955	12.906	13.6798	12.9855	36.4676	13.9353	11.099	18.3943	RHOD	11	67056818	67072013	+	1265	protein_coding	ras homolog family member D [Source:HGNC Symbol;Acc:HGNC:670]	-
ENSG00000166902	38.6989	25.9426	31.9295	49.51	25.7904	36.8376	33.6951	34.0082	38.6709	32.6334	21.6426	10.5684	23.6694	17.5079	18.9193	19.7545	19.8308	17.7026	MRPL16	11	59806135	59810872	-	2271	protein_coding	mitochondrial ribosomal protein L16 [Source:HGNC Symbol;Acc:HGNC:14476]	-
ENSG00000240376	20.1738	17.6075	35.3726	25.3516	16.9816	14.0347	36.5414	24.8783	34.1001	28.3186	26.0715	43.4074	25.8995	12.8114	38.2684	59.0571	14.0572	24.1135	AC010343.1	5	33162179	33162807	+	629	processed_pseudogene	ribosomal protein S8 (RPS8) pseudogene	-
ENSG00000124299	23.7418	16.9341	28.5205	32.1895	16.6447	18.4178	54.6843	39.1277	25.1823	43.4725	19.4787	16.0564	52.7753	14.7625	19.6198	20.1828	33.4244	21.6427	PEPD	19	33386950	33521794	-	4157	protein_coding	peptidase D [Source:HGNC Symbol;Acc:HGNC:8840]	-
ENSG00000111077	28.845	35.9492	25.524	29.0859	33.2012	32.622	36.2349	36.5093	53.47	30.9736	9.3222	15.1557	23.6854	22.7375	9.61827	10.3417	16.01	47.2824	TNS2	12	53046969	53064372	+	8093	protein_coding	tensin 2 [Source:HGNC Symbol;Acc:HGNC:19737]	-
ENSG00000065154	22.6109	27.8679	33.6221	29.1812	23.7856	18.4585	39.8276	30.1297	31.9357	62.7076	17.8529	13.2483	28.3451	14.271	12.0736	50.7041	15.9168	23.3548	OAT	10	124397303	124418976	-	3388	protein_coding	ornithine aminotransferase [Source:HGNC Symbol;Acc:HGNC:8091]	-
ENSG00000164896	32.6961	32.7218	27.8199	35.8093	35.1993	59.5194	27.389	34.5075	28.4358	23.3357	21.0487	13.6422	18.0752	20.934	18.4632	17.9139	23.1739	24.9095	FASTK	7	151076593	151080866	-	3805	protein_coding	Fas activated serine/threonine kinase [Source:HGNC Symbol;Acc:HGNC:24676]	-
ENSG00000058668	34.6159	38.0858	38.0233	52.2688	37.8476	30.1123	35.9046	30.5392	40.6233	65.3099	3.66544	8.59831	14.8347	4.84626	4.50776	28.7781	3.82821	23.1032	ATP2B4	1	203626561	203744081	+	9721	protein_coding	ATPase plasma membrane Ca2+ transporting 4 [Source:HGNC Symbol;Acc:HGNC:817]	-
ENSG00000075239	18.6605	9.76287	23.6738	28.6905	8.3741	13.9623	54.2327	26.0751	25.9064	67.1329	41.0733	11.6866	47.6093	21.1155	13.373	24.9167	39.6993	19.2644	ACAT1	11	108121516	108147776	+	5584	protein_coding	acetyl-CoA acetyltransferase 1 [Source:HGNC Symbol;Acc:HGNC:93]	-
ENSG00000102760	12.1657	10.2417	11.05	10.586	8.7402	9.11372	28.6274	21.8481	14.8951	15.5341	52.128	15.5495	40.2319	74.6527	103.036	20.7455	23.5379	21.898	RGCC	13	41457559	41470882	+	1032	protein_coding	regulator of cell cycle [Source:HGNC Symbol;Acc:HGNC:20369]	-
ENSG00000108523	29.459	22.0236	31.6881	30.8368	20.0255	31.9309	34.7105	31.028	23.3849	33.6373	27.3251	26.0026	26.6813	24.4297	30.6018	19.6638	25.1409	25.817	RNF167	17	4940008	4945222	+	2744	protein_coding	ring finger protein 167 [Source:HGNC Symbol;Acc:HGNC:24544]	-
ENSG00000123358	44.195	16.0969	12.1318	1.99986	17.2045	3.52858	15.3463	10.3795	34.0495	4.60229	16.2198	4.57162	25.0599	135.98	23.2007	13.2521	9.73642	106.546	NR4A1	12	52022832	52059507	+	7295	protein_coding	nuclear receptor subfamily 4 group A member 1 [Source:HGNC Symbol;Acc:HGNC:7980]	NGFIB-like
ENSG00000273650	21.4407	31.2387	27.7375	64.3761	51.5952	39.4246	31.8848	121.327	39.7203	18.244	0.433156	0.650534	3.69396	0.309628	1.75707	15.841	0.679472	23.7121	AC100793.4	17	42751289	42751717	-	429	lincRNA	novel transcript	-
ENSG00000102007	33.1234	30.2083	45.4522	22.1765	33.3128	21.4805	19.2418	14.6468	35.9625	18.8645	25.4981	43.0583	22.1041	28.837	38.6616	23.4507	15.7256	22.0983	PLP2	X	49171926	49175239	+	1279	protein_coding	proteolipid protein 2 [Source:HGNC Symbol;Acc:HGNC:9087]	-
ENSG00000176845	31.4475	15.8108	24.1673	26.9253	17.1968	47.6608	38.0635	38.3386	21.0551	24.0697	35.3639	14.7191	35.5563	34.4637	31.001	9.12571	25.6601	22.9874	METRNL	17	83079691	83095119	+	2626	protein_coding	meteorin like, glial cell differentiation regulator [Source:HGNC Symbol;Acc:HGNC:27584]	-
ENSG00000064666	28.2003	34.838	49.5807	23.1957	24.111	28.1348	28.1453	26.3896	33.5416	27.9585	14.453	38.1421	21.512	21.0512	25.1192	18.6722	14.7946	35.6454	CNN2	19	1026581	1039068	+	3645	protein_coding	calponin 2 [Source:HGNC Symbol;Acc:HGNC:2156]	-
ENSG00000213553	16.1162	20.2497	31.5077	27.3842	13.4358	16.172	40.7815	26.28	19.1732	39.8321	24.3967	47.5858	29.0363	17.2652	37.0307	45.3653	20.7773	21.0706	RPLP0P6	2	38481851	38482804	+	954	processed_pseudogene	ribosomal protein lateral stalk subunit P0 pseudogene 6 [Source:HGNC Symbol;Acc:HGNC:36404]	-
ENSG00000143158	27.6765	18.4688	28.268	38.5545	19.9277	25.3458	32.6649	28.5932	22.2493	23.9639	42.4512	19.9212	35.9416	25.0705	35.4837	20.9631	33.01	14.8941	MPC2	1	167916729	167937040	-	2552	protein_coding	mitochondrial pyruvate carrier 2 [Source:HGNC Symbol;Acc:HGNC:24515]	-
ENSG00000189241	25.6566	16.7405	36.4849	31.7654	15.2011	35.075	27.3389	18.5666	25.7418	50.3255	33.7456	23.844	35.6964	19.436	29.4775	24.2576	24.2619	19.6878	TSPYL1	6	116276578	116279903	-	3326	protein_coding	TSPY like 1 [Source:HGNC Symbol;Acc:HGNC:12382]	-
ENSG00000109046	31.2983	37.467	18.7037	29.3842	32.7405	25.2152	6.58876	21.4713	47.681	8.15114	18.7725	15.535	18.8794	49.7071	13.3254	41.016	31.7292	45.2918	WSB1	17	27294076	27315926	+	8602	protein_coding	WD repeat and SOCS box containing 1 [Source:HGNC Symbol;Acc:HGNC:19221]	-
ENSG00000108561	24.5554	17.0015	38.0614	34.9015	13.7997	15.1226	50.5619	30.7941	24.4446	42.8811	29.3857	22.7287	32.7664	21.9393	27.3105	21.2919	24.7801	20.2696	C1QBP	17	5432777	5448830	-	2335	protein_coding	complement C1q binding protein [Source:HGNC Symbol;Acc:HGNC:1243]	-
ENSG00000168159	28.8382	13.4241	33.3934	26.9151	17.4863	37.6225	38.5678	21.7009	25.392	39.4846	34.1809	29.1115	31.6652	23.4795	33.8533	10.3437	27.2268	19.8223	RNF187	1	228487061	228495766	+	3285	protein_coding	ring finger protein 187 [Source:HGNC Symbol;Acc:HGNC:27146]	-
ENSG00000005893	24.2872	23.0527	31.874	24.3377	15.5924	19.3344	47.0411	39.7566	21.3049	48.2531	25.0271	25.4114	28.1611	16.3053	22.5344	42.3028	19.5261	17.273	LAMP2	X	120427827	120469365	-	5526	protein_coding	lysosomal associated membrane protein 2 [Source:HGNC Symbol;Acc:HGNC:6501]	-
ENSG00000232388	41.3352	26.345	34.3746	35.1639	32.1027	29.9807	26.1408	40.5588	24.6353	22.0234	20.6894	22.7906	23.0345	15.8477	26.0872	36.1117	19.2913	14.202	SMIM26	20	18567347	18569563	+	1098	protein_coding	small integral membrane protein 26 [Source:HGNC Symbol;Acc:HGNC:43430]	-
ENSG00000125740	45.642	33.4501	3.13618	2.43172	7.35222	4.26408	43.9554	1.12115	5.25741	1.0984	14.0548	2.52124	22.5335	112.322	11.8187	8.16177	6.18542	165.046	FOSB	19	45467995	45475179	+	5553	protein_coding	FosB proto-oncogene, AP-1 transcription factor subunit [Source:HGNC Symbol;Acc:HGNC:3797]	TF_bZIP
ENSG00000162511	32.6468	26.2124	20.6145	34.529	37.1019	35.7329	46.1458	27.2215	16.9424	23.6582	5.70413	82.3144	20.4841	9.56129	10.5907	27.14	5.84649	27.3681	LAPTM5	1	30732469	30757820	-	3274	protein_coding	lysosomal protein transmembrane 5 [Source:HGNC Symbol;Acc:HGNC:29612]	-
ENSG00000147140	23.8895	25.2283	26.9007	24.683	23.3015	21.4365	37.1931	27.4927	21.3012	34.1589	28.5478	32.6348	27.2143	22.632	31.4978	26.7743	26.7055	27.4178	NONO	X	71283192	71301168	+	5292	protein_coding	non-POU domain containing octamer binding [Source:HGNC Symbol;Acc:HGNC:7871]	-
ENSG00000130340	32.5633	32.2273	41.7004	41.7788	46.5568	23.6283	27.9997	41.8026	33.51	36.3184	13.3247	13.973	17.2517	11.1432	13.5032	27.8456	11.0952	22.2398	SNX9	6	157700387	157945077	+	4637	protein_coding	sorting nexin 9 [Source:HGNC Symbol;Acc:HGNC:14973]	-
ENSG00000127837	24.354	18.618	30.6919	25.0678	18.615	21.1776	40.4202	30.1873	21.8588	36.8213	34.2354	23.1233	29.0496	25.6777	40.6659	15.1336	28.3293	24.0355	AAMP	2	218264123	218270257	-	3140	protein_coding	angio associated migratory cell protein [Source:HGNC Symbol;Acc:HGNC:18]	-
ENSG00000136522	38.9603	24.1413	37.457	47.6477	30.1471	29.0267	34.6589	34.3485	32.3561	30.889	23.4315	14.6669	22.1628	13.8001	17.9367	25.5854	12.2697	16.6288	MRPL47	3	179588285	179604654	-	1370	protein_coding	mitochondrial ribosomal protein L47 [Source:HGNC Symbol;Acc:HGNC:16652]	-
ENSG00000254851	59.053	51.0635	0.603172	2.97179	31.6199	201.44	0.477395	21.971	64.1468	0.787986	1.35638	16.5229	0.0771147	3.60893	3.36237	24.8643	1.00474	1.11155	AP005018.2	11	117135528	117138582	+	822	unprocessed_pseudogene	proprotein convertase subtilisin/kexin type 7 (PCSK7) pseudogene	-
ENSG00000133321	26.9797	28.731	45.8497	35.3644	45.7737	26.0403	20.5855	21.5456	28.0244	21.3166	11.015	41.7151	30.0106	12.9183	17.3697	35.5195	14.0249	22.9303	RARRES3	11	63536809	63546462	+	1299	protein_coding	retinoic acid receptor responder 3 [Source:HGNC Symbol;Acc:HGNC:9869]	-
ENSG00000171552	37.4593	18.5255	28.0893	31.3071	17.6556	47.2016	34.3734	25.5051	19.9201	27.9006	26.1858	22.0636	34.6589	18.344	36.514	10.0527	26.9738	22.7367	BCL2L1	20	31664452	31723989	-	3314	protein_coding	BCL2 like 1 [Source:HGNC Symbol;Acc:HGNC:992]	-
ENSG00000170955	52.4023	52.749	42.1451	57.2635	29.3513	43.7681	25.0794	28.3792	26.0843	22.6949	8.25205	17.4703	11.7147	6.5144	9.0466	24.2951	6.33429	21.7859	CAVIN3	11	6318946	6320647	-	1672	protein_coding	caveolae associated protein 3 [Source:HGNC Symbol;Acc:HGNC:9400]	-
ENSG00000142694	27.6097	27.1022	31.9859	21.9089	26.02	26.5019	30.6917	34.7363	17.023	16.6255	21.0989	34.2223	31.2492	21.2426	37.4713	22.9954	27.9217	28.4194	EVA1B	1	36322031	36324154	-	1211	protein_coding	eva-1 homolog B [Source:HGNC Symbol;Acc:HGNC:25558]	-
ENSG00000116649	42.13	29.1225	44.735	47.6207	38.5187	51.1624	30.1861	38.0615	35.8173	24.7987	9.61918	16.5663	11.0879	11.0342	15.0651	12.1952	7.85814	19.0634	SRM	1	11054584	11060024	-	1898	protein_coding	spermidine synthase [Source:HGNC Symbol;Acc:HGNC:11296]	-
ENSG00000115129	46.0275	21.7422	32.918	50.3343	20.3537	68.8002	15.0333	17.2969	39.6602	39.1987	19.792	8.99282	14.4214	19.3998	16.2798	13.3266	13.0701	27.7956	TP53I3	2	24077433	24085861	-	2312	protein_coding	tumor protein p53 inducible protein 3 [Source:HGNC Symbol;Acc:HGNC:19373]	-
ENSG00000163884	23.9513	27.5052	40.8675	30.9497	24.4616	24.9132	41.474	51.9913	43.3464	55.6827	4.15951	6.20611	30.6035	8.23971	7.92249	15.7164	23.2335	23.1418	KLF15	3	126342635	126357442	-	2848	protein_coding	Kruppel like factor 15 [Source:HGNC Symbol;Acc:HGNC:14536]	zf-C2H2
ENSG00000198911	35.7151	23.3885	31.9926	32.4149	26.1488	55.7991	17.5294	19.1189	38.2381	44.3344	23.7413	13.2332	23.6291	21.1394	21.7846	13.6852	18.817	22.5129	SREBF2	22	41833079	41907308	+	7557	protein_coding	sterol regulatory element binding transcription factor 2 [Source:HGNC Symbol;Acc:HGNC:11290]	bHLH
ENSG00000163527	28.1979	26.1837	28.0326	33.3864	24.8163	23.7205	35.468	35.1051	20.827	30.9086	26.9912	29.6786	24.3334	18.0128	24.4944	35.1108	15.9356	21.4265	STT3B	3	31532638	31637622	+	5012	protein_coding	STT3B, catalytic subunit of the oligosaccharyltransferase complex [Source:HGNC Symbol;Acc:HGNC:30611]	-
ENSG00000100612	25.0945	21.7046	49.6876	51.9783	25.3041	17.1204	24.2845	34.7094	28.5062	36.6937	30.7943	17.2563	23.6145	17.5853	21.7997	24.1637	19.3402	12.959	DHRS7	14	60144120	60169856	-	3248	protein_coding	dehydrogenase/reductase 7 [Source:HGNC Symbol;Acc:HGNC:21524]	-
ENSG00000213625	21.5891	19.3324	17.5738	25.0718	17.0421	17.8807	34.1262	26.9889	22.3213	42.5364	37.1861	30.2864	30.284	23.749	37.5956	28.4605	31.68	18.8194	LEPROT	1	65420587	65436007	+	5237	protein_coding	leptin receptor overlapping transcript [Source:HGNC Symbol;Acc:HGNC:29477]	-
ENSG00000115234	24.8584	18.066	29.5476	28.422	15.7928	34.0969	39.7705	26.3679	23.2783	47.1815	27.0469	28.1921	28.571	20.8154	29.7242	18.3349	19.7555	22.3267	SNX17	2	27370496	27377533	+	3765	protein_coding	sorting nexin 17 [Source:HGNC Symbol;Acc:HGNC:14979]	-
ENSG00000100258	32.7562	35.3701	28.0454	33.2392	34.8393	31.5533	24.7258	34.49	33.3604	23.1532	15.0442	25.267	19.3444	22.6748	17.3925	18.1865	19.996	32.6904	LMF2	22	50502949	50507691	-	3054	protein_coding	lipase maturation factor 2 [Source:HGNC Symbol;Acc:HGNC:25096]	-
ENSG00000121774	21.126	23.1292	28.5179	23.6777	18.507	11.773	33.514	27.5436	20.4745	34.9166	35.2434	36.609	32.4185	26.6179	32.241	23.6541	24.9952	24.8032	KHDRBS1	1	32013829	32060850	+	3588	protein_coding	KH RNA binding domain containing, signal transduction associated 1 [Source:HGNC Symbol;Acc:HGNC:18116]	-
ENSG00000116685	35.8103	19.7291	40.4232	37.3714	23.8197	25.7492	32.8397	28.5823	32.1418	34.9263	21.2811	20.7544	24.7293	19.0413	26.8032	11.0882	19.575	24.692	KIAA2013	1	11919591	11926428	-	3281	protein_coding	KIAA2013 [Source:HGNC Symbol;Acc:HGNC:28513]	-
ENSG00000005486	30.8328	16.4704	24.8818	28.7157	19.3753	34.5763	22.9889	26.4469	22.7973	22.4444	35.2655	24.3904	27.5262	45.2563	42.9233	9.23123	22.1914	22.9079	RHBDD2	7	75842602	75888926	+	2441	protein_coding	rhomboid domain containing 2 [Source:HGNC Symbol;Acc:HGNC:23082]	-
ENSG00000101161	28.0114	23.0761	28.5855	28.5779	27.0779	19.3519	25.7463	22.5898	23.0962	26.3856	32.6749	31.1871	28.5705	28.073	38.366	10.9444	31.7444	25.1537	PRPF6	20	63981135	64033100	+	3044	protein_coding	pre-mRNA processing factor 6 [Source:HGNC Symbol;Acc:HGNC:15860]	-
ENSG00000211772	14.8804	32.0908	21.8306	19.1572	26.9306	16.3265	23.5185	13.4669	11.1615	7.12098	4.90301	162.98	10.6205	7.35999	3.57997	63.2973	2.82008	37.1265	TRBC2	7	142801041	142802748	+	758	TR_C_gene	T cell receptor beta constant 2 [Source:HGNC Symbol;Acc:HGNC:12157]	-
ENSG00000249669	42.087	70.2314	43.8875	12.656	35.622	57.9238	2.11611	5.84635	90.2153	13.6263	0.81094	1.55147	4.27099	3.10144	0.374349	60.2116	1.44493	32.3563	CARMN	5	149406689	149432835	+	17988	lincRNA	cardiac mesoderm enhancer-associated non-coding RNA [Source:HGNC Symbol;Acc:HGNC:42872]	-
ENSG00000184908	0.365507	1.03242	1.62373	0.738819	0.424011	1.12287	0.286117	0.286259	1.88533	0.752997	83.3331	33.0134	135.317	56.6604	14.6875	2.45137	115.943	28.3529	CLCNKB	1	16043736	16057308	+	2939	protein_coding	chloride voltage-gated channel Kb [Source:HGNC Symbol;Acc:HGNC:2027]	-
ENSG00000103485	31.0625	19.2593	33.9829	44.6038	35.1128	37.1967	24.6743	33.2953	38.6896	27.0033	17.067	8.50571	23.4095	18.0049	26.8784	18.8419	17.1145	22.6292	QPRT	16	29679008	29698699	+	3642	protein_coding	quinolinate phosphoribosyltransferase [Source:HGNC Symbol;Acc:HGNC:9755]	-
ENSG00000169116	25.4206	17.3594	21.1018	20.3945	8.60532	18.7001	94.9364	56.3661	10.3917	80.5473	11.7294	14.2385	22.8671	17.7406	11.5698	15.7024	13.1734	15.7909	PARM1	4	74933095	75050115	+	5034	protein_coding	prostate androgen-regulated mucin-like protein 1 [Source:HGNC Symbol;Acc:HGNC:24536]	-
ENSG00000104324	34.8805	24.3275	34.1701	34.9584	20.1695	28.8296	28.184	29.6257	29.8161	40.6272	19.8617	20.5993	24.8456	18.0591	16.4842	32.7536	17.7493	20.6333	CPQ	8	96645227	97149654	+	3457	protein_coding	carboxypeptidase Q [Source:HGNC Symbol;Acc:HGNC:16910]	-
ENSG00000134884	19.2982	37.0972	17.1527	17.0399	27.4543	7.2137	10.7681	24.7423	47.1311	12.8672	21.6928	32.1429	20.9039	40.3749	17.3331	51.448	34.0326	37.7431	ARGLU1	13	106541673	106568164	-	5810	protein_coding	arginine and glutamate rich 1 [Source:HGNC Symbol;Acc:HGNC:25482]	-
ENSG00000204463	30.1684	25.619	31.2797	32.8034	29.3913	29.5209	27.8399	27.4523	29.3751	34.2261	22.3794	20.0594	24.4242	24.6899	24.1135	13.4524	22.2142	27.0954	BAG6	6	31639028	31652705	-	5310	protein_coding	BCL2 associated athanogene 6 [Source:HGNC Symbol;Acc:HGNC:13919]	-
ENSG00000146701	14.9731	10.7643	22.9282	25.3458	8.10015	23.0447	56.2908	21.4892	23.7929	54.318	35.3683	21.4362	35.707	29.8421	27.7553	13.809	30.2221	20.3936	MDH2	7	76048051	76067508	+	3641	protein_coding	malate dehydrogenase 2 [Source:HGNC Symbol;Acc:HGNC:6971]	-
ENSG00000155366	29.8693	22.5236	29.9878	24.4773	17.8849	26.3199	41.8918	35.3402	15.6939	23.6786	28.1181	27.8294	24.2506	22.4901	43.8147	21.4508	19.6958	20.2036	RHOC	1	112701106	112707434	-	4028	protein_coding	ras homolog family member C [Source:HGNC Symbol;Acc:HGNC:669]	-
ENSG00000066322	39.5283	17.5093	21.2849	39.6254	15.22	45.3488	43.5151	31.7017	18.965	37.6138	19.457	21.8744	20.4805	21.794	28.8845	14.0428	16.0455	21.4301	ELOVL1	1	43363397	43368074	-	2507	protein_coding	ELOVL fatty acid elongase 1 [Source:HGNC Symbol;Acc:HGNC:14418]	-
ENSG00000241553	37.5704	26.6873	29.0641	36.8054	26.0523	56.5266	28.7136	32.8784	19.717	21.8721	16.6098	26.1057	20.1339	14.7753	24.2486	19.6851	15.4176	21.4243	ARPC4	3	9792495	9807726	+	3608	protein_coding	actin related protein 2/3 complex subunit 4 [Source:HGNC Symbol;Acc:HGNC:707]	-
ENSG00000175084	33.3788	53.2599	87.8579	27.7592	47.8054	39.2091	14.288	4.84848	44.4677	8.54344	8.91789	1.75557	5.32523	2.28212	24.3715	59.5362	1.24216	8.97381	DES	2	219418377	219426739	+	2464	protein_coding	desmin [Source:HGNC Symbol;Acc:HGNC:2770]	-
ENSG00000166340	42.28	24.8142	36.301	42.5966	28.8908	53.733	32.3475	33.572	34.907	39.394	6.87895	13.2773	16.0795	6.80661	8.21667	15.9519	9.73278	27.7665	TPP1	11	6612763	6619485	-	6544	protein_coding	tripeptidyl peptidase 1 [Source:HGNC Symbol;Acc:HGNC:2073]	-
ENSG00000184811	27.0536	15.807	4.23973	62.1006	19.4229	6.53877	107.817	95.2834	31.4636	71.0887	0.0516752	0.763147	4.1777	0.246256	1.81668	2.51502	0.216161	22.2919	TRARG1	17	1279663	1300987	+	3596	protein_coding	trafficking regulator of GLUT4 (SLC2A4) 1 [Source:HGNC Symbol;Acc:HGNC:29592]	-
ENSG00000183828	36.5481	22.8574	32.67	44.7296	43.7937	47.237	35.3153	39.8702	31.2828	27.5519	14.7903	7.69555	14.4906	13.2414	10.019	9.44053	18.1803	22.7947	NUDT14	14	105172938	105181323	-	1916	protein_coding	nudix hydrolase 14 [Source:HGNC Symbol;Acc:HGNC:20141]	-
ENSG00000185787	22.0772	21.5681	32.3905	18.7366	13.6096	22.731	32.3979	22.0381	18.9582	38.261	31.5681	31.0418	32.5703	20.7262	30.3391	40.2623	26.003	17.0786	MORF4L1	15	78810487	78898133	+	6584	protein_coding	mortality factor 4 like 1 [Source:HGNC Symbol;Acc:HGNC:16989]	-
ENSG00000161202	42.6262	31.2973	36.2532	34.2369	44.5899	41.3812	23.056	25.745	36.1618	31.8793	14.7801	8.95496	11.527	13.8295	17.2663	14.6757	13.5341	29.9496	DVL3	3	184155311	184173614	+	6368	protein_coding	dishevelled segment polarity protein 3 [Source:HGNC Symbol;Acc:HGNC:3087]	-
ENSG00000123159	36.8812	22.2559	30.96	32.904	27.7996	36.0487	26.4516	31.7324	24.1542	27.3289	25.5508	16.5625	16.8322	28.9993	30.7285	11.8304	20.8991	23.3089	GIPC1	19	14477760	14496149	-	4440	protein_coding	GIPC PDZ domain containing family member 1 [Source:HGNC Symbol;Acc:HGNC:1226]	-
ENSG00000090266	28.4288	15.3977	34.9111	30.9906	15.3191	35.4539	39.3692	26.36	25.0675	36.3164	30.4936	18.0426	27.1969	20.1521	23.8774	30.2188	19.8393	13.6839	NDUFB2	7	140690777	140722790	+	4447	protein_coding	NADH:ubiquinone oxidoreductase subunit B2 [Source:HGNC Symbol;Acc:HGNC:7697]	-
ENSG00000204257	35.1328	17.1631	17.7808	37.6769	20.6313	37.0516	41.3259	32.8911	25.0642	27.6701	16.2431	41.1717	18.9865	21.5268	18.7801	17.0791	9.79697	34.8796	HLA-DMA	6	32948613	32969094	-	2534	protein_coding	major histocompatibility complex, class II, DM alpha [Source:HGNC Symbol;Acc:HGNC:4934]	-
ENSG00000160888	33.5259	17.4662	12.2661	10.3374	15.7432	17.6984	11.2229	7.8508	8.97973	7.08097	48.1346	15.4136	21.1501	134.848	36.1024	8.26654	22.2985	42.0364	IER2	19	13150415	13154908	+	3072	protein_coding	immediate early response 2 [Source:HGNC Symbol;Acc:HGNC:28871]	-
ENSG00000122971	20.4612	7.67736	16.2195	52.3782	10.2637	33.182	95.3102	32.5765	18.4726	54.5478	20.7894	11.7864	23.5791	15.2494	16.8899	5.96251	14.8976	19.921	ACADS	12	120725735	120740008	+	2648	protein_coding	acyl-CoA dehydrogenase short chain [Source:HGNC Symbol;Acc:HGNC:90]	-
ENSG00000049540	69.5817	93.652	36.3594	25.9412	20.9083	47.9356	17.7468	14.7892	29.1072	31.3697	4.58737	7.11704	12.5866	5.83408	3.38753	10.6379	4.28492	34.0786	ELN	7	74027789	74069907	+	6542	protein_coding	elastin [Source:HGNC Symbol;Acc:HGNC:3327]	-
ENSG00000165795	18.5411	33.0087	28.5417	21.4353	23.9723	28.2369	28.5051	23.6756	21.5594	24.6936	38.0509	16.1533	28.8815	22.2146	17.565	36.9517	37.3794	20.4603	NDRG2	14	21016763	21070872	-	7550	protein_coding	NDRG family member 2 [Source:HGNC Symbol;Acc:HGNC:14460]	-
ENSG00000145390	39.4969	32.7761	33.1973	35.9153	27.2573	28.7208	11.9579	34.61	95.3536	29.9471	6.65545	5.97471	13.9295	8.26994	7.92261	24.4193	4.93547	28.0557	USP53	4	119212587	119295517	+	11950	protein_coding	ubiquitin specific peptidase 53 [Source:HGNC Symbol;Acc:HGNC:29255]	-
ENSG00000112473	26.6433	15.5891	29.4086	29.6467	12.1186	16.3266	52.2568	24.9191	16.3349	50.1066	29.5881	26.1259	28.6083	21.7882	23.3156	16.1101	25.3925	25.0504	SLC39A7	6	33200445	33204439	+	2845	protein_coding	solute carrier family 39 member 7 [Source:HGNC Symbol;Acc:HGNC:4927]	-
ENSG00000232320	25.2265	20.2879	18.5564	34.6583	16.2579	22.1193	56.2792	29.4158	18.1889	51.4419	26.3645	14.4728	31.6321	12.5639	17.4063	42.8968	18.7294	12.7548	AC009299.2	2	161340816	161341326	-	511	processed_pseudogene	matrix-remodelling associated 7 (MXRA7) pseudogene	-
ENSG00000172465	16.5962	40.8169	50.2539	14.7402	23.781	15.244	15.2222	13.2692	41.5055	38.478	15.9783	15.185	22.7122	13.5705	16.9703	90.5187	9.94692	14.0686	TCEAL1	X	103628704	103630953	+	1602	protein_coding	transcription elongation factor A like 1 [Source:HGNC Symbol;Acc:HGNC:11616]	-
ENSG00000104341	11.4034	14.9642	23.2822	9.93323	13.4943	9.83225	15.6764	11.8772	14.3873	39.4402	54.2011	40.1262	36.7799	34.2774	45.7567	54.916	24.1164	14.1946	LAPTM4B	8	97775057	97853013	+	3197	protein_coding	lysosomal protein transmembrane 4 beta [Source:HGNC Symbol;Acc:HGNC:13646]	-
ENSG00000179862	39.5896	23.787	54.017	53.2638	27.6415	26.6443	15.1225	22.2475	41.0634	19.1134	11.3669	43.2969	22.8795	14.6356	11.4175	5.39694	10.5212	26.4759	CITED4	1	40861051	40862366	-	1316	protein_coding	Cbp/p300 interacting transactivator with Glu/Asp rich carboxy-terminal domain 4 [Source:HGNC Symbol;Acc:HGNC:18696]	-
ENSG00000104267	0.758992	0.595517	0.291926	0.639245	1.00626	0.116585	4.72666	2.19278	1.20676	2.18654	97.6823	20.0031	132.629	80.1278	54.3709	2.57527	55.2643	11.3907	CA2	8	85463852	85481493	+	2123	protein_coding	carbonic anhydrase 2 [Source:HGNC Symbol;Acc:HGNC:1373]	-
ENSG00000118515	44.26	25.7918	24.3884	32.5426	28.4473	24.6634	21.5891	29.3236	47.5057	35.3238	6.12315	11.498	20.2307	17.9287	17.3207	22.6333	8.34338	49.1597	SGK1	6	134169246	134318112	-	9992	protein_coding	serum/glucocorticoid regulated kinase 1 [Source:HGNC Symbol;Acc:HGNC:10810]	-
ENSG00000099817	33.7973	19.4905	28.37	31.3685	17.9427	36.4778	55.91	32.5688	29.331	41.0958	17.723	15.89	18.8015	16.4002	20.1629	11.4481	17.0262	21.4855	POLR2E	19	1086579	1095380	-	4865	protein_coding	RNA polymerase II subunit E [Source:HGNC Symbol;Acc:HGNC:9192]	-
ENSG00000116857	35.9962	24.4008	36.7898	26.917	32.7855	40.5246	16.0519	21.9193	26.8454	26.0854	26.1767	21.9081	21.7285	19.3732	23.7077	26.4552	21.7782	15.7301	TMEM9	1	201134772	201171574	-	3915	protein_coding	transmembrane protein 9 [Source:HGNC Symbol;Acc:HGNC:18823]	-
ENSG00000134108	33.4381	24.5786	32.4784	31.7647	26.7003	30.4081	30.3971	28.1536	27.4243	40.0752	23.6177	18.3659	22.5652	14.7589	22.4702	26.6055	16.0039	15.3475	ARL8B	3	5122220	5180912	+	3576	protein_coding	ADP ribosylation factor like GTPase 8B [Source:HGNC Symbol;Acc:HGNC:25564]	-
ENSG00000122359	36.4837	17.0017	29.754	31.9551	22.334	24.5969	25.9128	19.4689	23.2289	26.8015	36.5241	23.4615	28.4812	27.6749	38.7709	9.00321	25.0758	18.4893	ANXA11	10	80150889	80205572	-	8513	protein_coding	annexin A11 [Source:HGNC Symbol;Acc:HGNC:535]	-
ENSG00000143416	14.064	21.0425	27.6274	29.6482	22.0329	12.5497	27.7899	27.4515	24.7742	59.3686	29.4062	10.9911	29.8489	33.5235	16.0623	18.3007	38.5025	21.9732	SELENBP1	1	151364302	151372733	-	3504	protein_coding	selenium binding protein 1 [Source:HGNC Symbol;Acc:HGNC:10719]	-
ENSG00000116754	30.4277	38.9685	23.07	27.0046	48.3668	17.4101	10.3214	29.7351	50.7274	10.7916	17.0132	20.0589	15.3664	22.418	14.9102	36.6291	22.5968	29.1374	SRSF11	1	70205682	70253052	+	8473	protein_coding	serine and arginine rich splicing factor 11 [Source:HGNC Symbol;Acc:HGNC:10782]	-
ENSG00000115541	39.8352	24.531	30.1259	41.1872	30.7963	33.7608	31.22	51.8037	21.2464	22.1969	17.9292	17.2219	20.7447	14.4006	17.5895	23.7002	14.1053	12.3244	HSPE1	2	197499994	197503457	+	1977	protein_coding	heat shock protein family E (Hsp10) member 1 [Source:HGNC Symbol;Acc:HGNC:5269]	-
ENSG00000102103	41.0314	31.9957	31.5253	39.8649	49.4252	35.6806	19.7668	31.2122	28.2717	18.6636	12.3525	16.3517	16.6881	14.565	23.5285	20.3257	14.9602	18.3091	PQBP1	X	48897912	48903143	+	1903	protein_coding	polyglutamine binding protein 1 [Source:HGNC Symbol;Acc:HGNC:9330]	-
ENSG00000079308	29.0602	26.2998	31.7398	22.4061	31.9615	30.5567	30.2525	18.2411	43.4713	50.8971	15.8848	15.1901	24.0456	20.1626	15.1241	11.8537	20.1479	26.747	TNS1	2	217799588	218033982	-	16281	protein_coding	tensin 1 [Source:HGNC Symbol;Acc:HGNC:11973]	-
ENSG00000165915	32.7787	24.3479	32.1236	29.6499	23.4051	42.0615	16.3263	19.5279	25.644	23.6444	39.1795	15.3623	19.5945	30.1167	33.2055	11.9938	24.3335	20.6499	SLC39A13	11	47407132	47416501	+	4584	protein_coding	solute carrier family 39 member 13 [Source:HGNC Symbol;Acc:HGNC:20859]	-
ENSG00000119689	24.9374	16.8719	21.4532	30.1548	15.194	30.9342	40.2768	21.2886	22.6537	55.8514	30.2117	17.5626	31.3598	21.7199	20.134	13.285	26.544	23.0131	DLST	14	74881891	74903745	+	4550	protein_coding	dihydrolipoamide S-succinyltransferase [Source:HGNC Symbol;Acc:HGNC:2911]	-
ENSG00000121966	20.3168	14.371	11.0353	10.0991	14.862	11.129	31.2564	22.4956	10.0729	12.4992	6.74698	142.886	23.1151	15.9468	8.60885	57.4143	7.49267	42.9733	CXCR4	2	136114349	136118165	-	2224	protein_coding	C-X-C motif chemokine receptor 4 [Source:HGNC Symbol;Acc:HGNC:2561]	-
ENSG00000022840	29.0206	23.0142	31.5908	34.898	30.7298	24.663	30.2444	29.2631	25.4711	31.9972	25.3068	17.5241	27.099	20.4867	22.5034	15.1274	24.213	19.93	RNF10	12	120533480	120577594	+	5911	protein_coding	ring finger protein 10 [Source:HGNC Symbol;Acc:HGNC:10055]	-
ENSG00000130706	35.3248	23.8455	33.4473	40.1686	26.3185	28.6951	36.4572	33.1236	24.0046	30.4408	18.8904	19.1959	20.0937	18.6657	25.478	12.953	14.2208	21.4419	ADRM1	20	62302093	62308862	+	2142	protein_coding	adhesion regulating molecule 1 [Source:HGNC Symbol;Acc:HGNC:15759]	-
ENSG00000164120	22.1611	42.9431	71.1114	22.5082	32.3485	11.1914	1.49047	23.3927	43.0285	27.6768	5.17578	3.35662	18.3091	3.13917	1.83595	121.396	4.37583	7.1831	HPGD	4	174490177	174523154	-	5529	protein_coding	15-hydroxyprostaglandin dehydrogenase [Source:HGNC Symbol;Acc:HGNC:5154]	-
ENSG00000205531	32.4205	19.9173	29.8795	32.9492	24.0333	47.6932	23.157	22.7586	23.8322	28.0058	23.8891	23.0866	26.233	22.2661	23.5895	17.5496	22.5814	18.7659	NAP1L4	11	2944431	2992377	-	5200	protein_coding	nucleosome assembly protein 1 like 4 [Source:HGNC Symbol;Acc:HGNC:7640]	-
ENSG00000143222	29.5542	21.1047	36.4388	30.9738	24.3733	15.8186	20.5848	27.7725	21.3798	26.2052	32.5641	27.9202	26.4536	20.6975	33.9434	32.289	21.4497	12.6969	UFC1	1	161152776	161158856	+	2274	protein_coding	ubiquitin-fold modifier conjugating enzyme 1 [Source:HGNC Symbol;Acc:HGNC:26941]	-
ENSG00000064961	29.1047	28.8979	34.3703	30.6644	25.432	34.4601	25.9442	28.5891	26.7548	27.1215	20.3072	21.1281	21.6772	19.8597	22.7483	19.1959	21.3122	23.8946	HMG20B	19	3572777	3579088	+	3857	protein_coding	high mobility group 20B [Source:HGNC Symbol;Acc:HGNC:5002]	HMG
ENSG00000150938	22.8982	18.0571	14.4889	11.8905	5.69084	17.8282	22.9765	11.3089	14.8073	27.2083	38.8177	46.5458	55.1911	24.8116	55.8193	11.228	35.5533	26.3084	CRIM1	2	36355926	36551135	+	7122	protein_coding	cysteine rich transmembrane BMP regulator 1 [Source:HGNC Symbol;Acc:HGNC:2359]	-
ENSG00000210112	25.6709	29.0041	10.9369	21.9534	27.9253	49.7446	42.8693	19.7956	15.7713	15.8756	18.4458	3.42009	56.863	10.4181	23.6481	9.76839	40.7233	38.5186	MT-TM	MT	4402	4469	+	68	Mt_tRNA	mitochondrially encoded tRNA methionine [Source:HGNC Symbol;Acc:HGNC:7492]	-
ENSG00000119138	16.9048	20.5217	22.0718	12.3124	11.5357	15.7992	36.3766	21.6222	20.217	29.1006	28.1698	29.1932	55.108	34.1038	30.8505	29.9172	22.2305	24.7772	KLF9	9	70384597	70414624	-	5175	protein_coding	Kruppel like factor 9 [Source:HGNC Symbol;Acc:HGNC:1123]	zf-C2H2
ENSG00000182952	16.6003	16.6322	20.5289	17.0971	13.601	11.6567	31.3741	13.3395	17.5374	42.6223	30.9585	46.8053	29.0074	27.3515	36.3283	42.7139	23.8335	22.7109	HMGN4	6	26538405	26546254	+	1274	protein_coding	high mobility group nucleosomal binding domain 4 [Source:HGNC Symbol;Acc:HGNC:4989]	-
ENSG00000123989	25.7227	23.2954	38.0836	20.9597	24.7167	38.1276	24.7706	22.5421	21.1747	24.3009	38.3532	24.1025	26.5535	24.211	30.0105	8.33322	22.6543	22.3929	CHPF	2	219538947	219543787	-	3354	protein_coding	chondroitin polymerizing factor [Source:HGNC Symbol;Acc:HGNC:24291]	-
ENSG00000147955	39.3479	20.4266	38.8619	41.0658	27.9142	29.9431	28.6681	29.8572	38.6893	39.8437	14.1526	15.8009	15.6739	13.1459	15.2404	14.5424	11.5704	24.8257	SIGMAR1	9	34634722	34637809	-	2196	protein_coding	sigma non-opioid intracellular receptor 1 [Source:HGNC Symbol;Acc:HGNC:8157]	-
ENSG00000101363	27.7421	22.4294	35.6702	31.3564	25.3906	35.9867	29.1676	24.3823	25.9881	33.0197	21.4447	18.3096	21.0468	17.3643	27.2517	25.2108	18.2926	19.2122	MANBAL	20	37289638	37317260	+	2045	protein_coding	mannosidase beta like [Source:HGNC Symbol;Acc:HGNC:15799]	-
ENSG00000146731	25.0244	25.2532	28.6922	26.9788	22.1028	16.4964	29.3736	24.6003	26.3767	31.3402	26.4612	31.3466	28.1437	21.5539	24.7332	33.2302	18.2074	18.3629	CCT6A	7	56051630	56063989	+	3901	protein_coding	chaperonin containing TCP1 subunit 6A [Source:HGNC Symbol;Acc:HGNC:1620]	-
ENSG00000135842	53.5301	29.6227	48.303	40.6876	26.9418	33.7128	18.5281	14.7052	45.5322	79.0829	1.6425	4.66688	10.4183	2.12605	1.60264	23.7843	1.30566	21.8129	FAM129A	1	184790724	184974550	-	8372	protein_coding	family with sequence similarity 129 member A [Source:HGNC Symbol;Acc:HGNC:16784]	-
ENSG00000105254	36.7388	29.7711	36.3172	37.8859	38.0384	34.4301	20.5968	25.6155	27.354	20.2211	17.4035	19.6066	16.2378	18.2379	24.008	20.3402	14.7967	20.164	TBCB	19	36114289	36125947	+	3326	protein_coding	tubulin folding cofactor B [Source:HGNC Symbol;Acc:HGNC:1989]	-
ENSG00000099800	30.2517	16.7119	28.1766	31.4689	16.843	44.0742	38.8981	28.1433	16.7598	27.9871	28.1373	21.3117	27.4051	18.2897	27.7877	16.2638	21.8164	16.9186	TIMM13	19	2425624	2427894	-	1973	protein_coding	translocase of inner mitochondrial membrane 13 [Source:HGNC Symbol;Acc:HGNC:11816]	-
ENSG00000265917	32.4867	47.3086	6.99728	55.8169	48.8131	31.9367	8.13772	41.6134	34.5951	9.57657	20.9801	16.5047	18.403	22.1384	8.10519	30.4929	16.4553	6.87729	MIR3685	12	95309923	95309984	+	62	miRNA	microRNA 3685 [Source:HGNC Symbol;Acc:HGNC:38886]	-
ENSG00000113013	24.866	15.3846	23.7572	30.3107	15.6154	23.7994	42.3743	24.8433	22.5502	42.2779	34.1131	18.461	32.3162	21.3552	23.3118	18.8686	24.0498	18.5603	HSPA9	5	138553756	138575724	-	8254	protein_coding	heat shock protein family A (Hsp70) member 9 [Source:HGNC Symbol;Acc:HGNC:5244]	-
ENSG00000168906	20.0954	16.8834	16.6438	9.55759	6.09681	15.3349	22.5139	13.3625	28.8142	43.2586	22.7052	25.221	34.7103	48.7863	26.1509	36.2923	31.6808	38.595	MAT2A	2	85539165	85545280	+	4487	protein_coding	methionine adenosyltransferase 2A [Source:HGNC Symbol;Acc:HGNC:6904]	-
ENSG00000166888	24.9127	24.0938	26.1559	30.776	27.2395	33.3042	26.2247	25.9226	28.1329	37.3801	16.716	23.9832	20.2811	24.1344	17.4278	16.6003	20.237	32.9271	STAT6	12	57095408	57132139	-	7298	protein_coding	signal transducer and activator of transcription 6 [Source:HGNC Symbol;Acc:HGNC:11368]	STAT
ENSG00000077238	32.0318	46.6759	45.9088	28.8623	66.1071	39.6838	9.7301	20.3072	63.6542	24.1953	2.73502	9.76982	10.1202	5.13833	4.38236	18.5781	4.28618	23.863	IL4R	16	27313668	27364778	+	5894	protein_coding	interleukin 4 receptor [Source:HGNC Symbol;Acc:HGNC:6015]	-
ENSG00000130811	23.882	20.7014	31.3257	20.8278	21.653	21.4896	33.1116	19.0981	20.8173	25.533	25.6001	36.5461	25.439	22.3289	36.399	26.8819	22.3121	21.9818	EIF3G	19	10115017	10119918	-	3486	protein_coding	eukaryotic translation initiation factor 3 subunit G [Source:HGNC Symbol;Acc:HGNC:3274]	-
ENSG00000135862	25.5665	23.192	26.1809	29.9725	16.6955	21.9753	56.9268	33.8554	21.0084	67.0892	15.3361	15.0507	16.439	15.5385	15.2741	20.9223	11.4896	23.1522	LAMC1	1	183023460	183145592	+	8406	protein_coding	laminin subunit gamma 1 [Source:HGNC Symbol;Acc:HGNC:6492]	-
ENSG00000162998	33.612	47.2127	65.3471	20.6658	23.4963	23.7177	37.0895	30.0482	9.27058	14.1515	11.6067	33.4801	18.9644	9.19982	10.4096	40.6249	8.75771	17.8193	FRZB	2	182833275	182867162	-	3162	protein_coding	frizzled related protein [Source:HGNC Symbol;Acc:HGNC:3959]	-
ENSG00000186510	0.560137	0.567399	0.374423	0.370904	0.49508	0.545907	0.145149	0.403392	1.01129	0.20187	120.818	3.46574	30.4176	102.298	96.8757	0.779085	82.4053	13.6862	CLCNKA	1	16018875	16034050	+	3476	protein_coding	chloride voltage-gated channel Ka [Source:HGNC Symbol;Acc:HGNC:2026]	-
ENSG00000204568	14.4378	14.0625	22.092	22.0316	10.3722	16.4744	36.2845	24.9542	19.8181	34.8792	42.0269	25.3999	35.488	27.3916	39.925	18.0244	35.3045	15.9058	MRPS18B	6	30617709	30626395	+	1888	protein_coding	mitochondrial ribosomal protein S18B [Source:HGNC Symbol;Acc:HGNC:14516]	-
ENSG00000158109	26.3105	12.6952	29.5502	22.8248	11.5045	35.9883	32.4887	20.2603	22.5093	36.6927	28.7511	26.0312	33.2434	19.167	36.9502	16.0866	26.3238	16.7801	TPRG1L	1	3625002	3630127	+	2414	protein_coding	tumor protein p63 regulated 1 like [Source:HGNC Symbol;Acc:HGNC:27007]	-
ENSG00000106723	24.6477	34.9286	26.5359	25.187	40.2009	25.7718	19.3939	25.6697	21.5576	24.1106	24.457	18.9687	22.1872	21.6518	20.5549	35.2287	24.647	18.4202	SPIN1	9	88388419	88478694	+	4914	protein_coding	spindlin 1 [Source:HGNC Symbol;Acc:HGNC:11243]	-
ENSG00000218283	11.3171	9.51807	19.74	9.75384	7.05714	6.05763	42.2043	11.6003	12.6924	57.2703	37.4242	45.3588	41.0352	23.8554	30.9204	45.0725	23.6129	19.1495	MORF4L1P1	1	220253570	220254536	+	967	processed_pseudogene	mortality factor 4 like 1 pseudogene 1 [Source:HGNC Symbol;Acc:HGNC:20400]	-
ENSG00000113068	27.5594	25.1684	34.5237	32.134	30.5514	25.8683	29.304	33.9491	27.994	24.0093	22.4954	22.5878	20.61	16.306	22.0727	25.1689	16.6973	16.4149	PFDN1	5	140245039	140303121	-	2156	protein_coding	prefoldin subunit 1 [Source:HGNC Symbol;Acc:HGNC:8866]	-
ENSG00000146007	21.9351	13.7871	23.6343	18.6491	13.3289	18.1216	31.8353	18.9125	20.0245	43.1935	35.5855	30.9831	32.4638	20.4279	30.9223	35.7279	26.007	17.5814	ZMAT2	5	140698680	140706676	+	1812	protein_coding	zinc finger matrin-type 2 [Source:HGNC Symbol;Acc:HGNC:26433]	-
ENSG00000161544	38.0888	10.3749	19.2506	75.8403	14.951	48.7074	42.3538	100.554	21.234	24.4718	3.10337	5.88315	6.27649	2.34221	4.51571	5.73511	6.37549	22.7417	CYGB	17	76527356	76551175	-	2949	protein_coding	cytoglobin [Source:HGNC Symbol;Acc:HGNC:16505]	-
ENSG00000130717	37.7408	22.219	33.5472	41.6526	36.2053	64.2408	19.8754	26.917	25.4236	25.1411	16.2803	11.386	15.7999	11.448	20.0971	15.3593	15.2723	13.9593	UCK1	9	131523801	131531268	-	2688	protein_coding	uridine-cytidine kinase 1 [Source:HGNC Symbol;Acc:HGNC:14859]	-
ENSG00000262814	49.6359	26.6139	29.2999	43.6311	40.8693	50.16	32.5016	38.6284	14.4314	17.1172	14.1447	12.0808	17.5119	12.9643	13.9318	13.8178	13.138	11.0805	MRPL12	17	81703357	81707526	+	1028	protein_coding	mitochondrial ribosomal protein L12 [Source:HGNC Symbol;Acc:HGNC:10378]	-
ENSG00000074527	4.56082	4.51573	2.52902	3.37162	1.6096	5.12922	7.36071	5.1564	2.13094	4.47001	112.07	32.7356	36.8979	53.2044	104.521	5.74004	54.553	10.6737	NTN4	12	95657807	95791152	-	4166	protein_coding	netrin 4 [Source:HGNC Symbol;Acc:HGNC:13658]	-
ENSG00000100644	11.9002	15.2666	19.8645	12.4093	14.3428	16.0329	20.3082	14.6344	12.2839	20.9579	67.4428	30.6927	28.2054	30.8072	79.705	23.0533	18.269	15.0065	HIF1A	14	61695513	61748259	+	5151	protein_coding	hypoxia inducible factor 1 subunit alpha [Source:HGNC Symbol;Acc:HGNC:4910]	Others
ENSG00000127540	32.5864	16.8806	32.7599	37.2245	20.415	33.2544	35.8616	36.9745	26.5079	31.8944	24.621	13.6664	19.1845	14.0591	22.895	21.4742	17.0072	13.7628	UQCR11	19	1597172	1605490	-	2151	protein_coding	ubiquinol-cytochrome c reductase, complex III subunit XI [Source:HGNC Symbol;Acc:HGNC:30862]	-
ENSG00000185909	30.614	18.9818	21.8265	34.431	16.939	43.6984	72.4517	32.93	14.7709	53.8269	12.7442	9.2466	11.1032	11.5103	12.3185	18.4448	10.2432	24.6983	KLHDC8B	3	49171611	49176486	+	2158	protein_coding	kelch domain containing 8B [Source:HGNC Symbol;Acc:HGNC:28557]	-
ENSG00000183726	31.7976	26.7094	29.0432	30.3063	25.7378	21.3153	27.7998	32.7644	23.8671	26.2445	22.1926	22.8337	21.7862	17.9185	31.1534	28.3651	15.6005	14.6299	TMEM50A	1	25337917	25362361	+	3410	protein_coding	transmembrane protein 50A [Source:HGNC Symbol;Acc:HGNC:30590]	-
ENSG00000122378	19.009	11.0528	15.6746	32.2524	16.3189	15.0961	78.6471	51.795	17.5452	49.5976	27.4746	6.61315	15.4776	15.8025	32.4327	10.7208	18.5089	15.8636	PRXL2A	10	80407829	80437115	+	6520	protein_coding	peroxiredoxin like 2A [Source:HGNC Symbol;Acc:HGNC:28651]	-
ENSG00000277443	28.0178	20.7135	24.9353	28.8725	11.5907	14.6672	60.0463	42.6134	9.70011	33.6615	21.1796	36.9603	20.2694	17.8971	20.7474	16.6376	19.4556	21.886	MARCKS	6	113857362	113863471	+	4275	protein_coding	myristoylated alanine rich protein kinase C substrate [Source:HGNC Symbol;Acc:HGNC:6759]	-
ENSG00000141959	29.5906	15.6371	19.6634	30.3322	14.7124	42.2591	28.2686	18.9577	20.0315	31.3667	33.939	15.8987	26.02	30.8886	25.4076	6.82351	32.1342	27.877	PFKL	21	44300051	44327376	+	8926	protein_coding	phosphofructokinase, liver type [Source:HGNC Symbol;Acc:HGNC:8876]	-
ENSG00000100591	30.4039	21.3058	37.5892	37.3576	23.1488	17.2395	30.7112	34.4174	26.7384	34.1476	20.2339	16.5037	22.4697	17.6176	24.1545	20.4523	16.1336	19.0922	AHSA1	14	77457870	77469474	+	2948	protein_coding	activator of HSP90 ATPase activity 1 [Source:HGNC Symbol;Acc:HGNC:1189]	-
ENSG00000179820	29.998	22.1826	31.536	20.7907	16.0989	23.2356	54.7022	24.5717	25.7614	66.9315	8.92461	13.53	21.9746	19.4938	12.881	14.154	6.64949	36.2992	MYADM	19	53866223	53876437	+	3675	protein_coding	myeloid associated differentiation marker [Source:HGNC Symbol;Acc:HGNC:7544]	-
ENSG00000211893	1.64352	16.3705	3.87208	20.3543	4.89994	4.03925	49.4645	3.46321	1.95917	19.9184	1.51063	230.748	60.6091	3.42955	1.61571	11.4626	2.85778	11.1945	IGHG2	14	105639559	105644790	-	2737	IG_C_gene	immunoglobulin heavy constant gamma 2 (G2m marker) [Source:HGNC Symbol;Acc:HGNC:5526]	-
ENSG00000102119	21.3715	21.0797	30.1289	24.1862	20.2407	21.1976	26.3648	23.9899	24.4221	27.2557	25.6198	21.6678	26.8616	37.7887	31.843	16.2142	24.0987	24.9985	EMD	X	154379197	154381523	+	2020	protein_coding	emerin [Source:HGNC Symbol;Acc:HGNC:3331]	-
ENSG00000112081	22.3451	25.2004	26.887	19.514	23.935	17.6644	23.3989	22.3783	25.22	22.6206	27.1766	27.589	23.4389	33.4035	23.4529	38.7277	25.5538	20.641	SRSF3	6	36594353	36605600	+	7118	protein_coding	serine and arginine rich splicing factor 3 [Source:HGNC Symbol;Acc:HGNC:10785]	-
ENSG00000176903	25.8188	19.3499	29.0736	25.3346	13.1055	22.9034	31.558	17.3893	23.8782	53.3935	25.6674	25.7708	27.6559	18.2919	26.6007	22.1943	20.1269	19.8967	PNMA1	14	73711783	73714372	-	2590	protein_coding	PNMA family member 1 [Source:HGNC Symbol;Acc:HGNC:9158]	-
ENSG00000134548	17.7156	1.83234	2.5884	92.1605	6.2944	14.9466	17.9398	100.075	101.182	32.2922	5.12038	2.43791	6.21522	2.58398	5.4971	1.81603	4.94489	32.2887	SPX	12	21526307	21541249	+	7231	protein_coding	spexin hormone [Source:HGNC Symbol;Acc:HGNC:28139]	-
ENSG00000155287	29.304	33.6278	26.9092	32.942	39.4595	35.3988	24.2127	32.1824	25.5636	17.2234	12.5206	18.4993	18.5289	16.5754	17.7529	22.1562	17.8827	26.656	SLC25A28	10	99610522	99620609	-	1755	protein_coding	solute carrier family 25 member 28 [Source:HGNC Symbol;Acc:HGNC:23472]	-
ENSG00000172531	25.1617	14.1958	25.4442	24.7044	13.1991	28.0286	29.3844	19.5096	18.2192	24.5495	31.4962	34.0399	30.0457	29.5451	42.3742	11.6667	26.8268	18.784	PPP1CA	11	67398183	67421183	-	2711	protein_coding	protein phosphatase 1 catalytic subunit alpha [Source:HGNC Symbol;Acc:HGNC:9281]	-
ENSG00000134352	23.8007	20.8011	18.7622	25.2962	21.3557	17.4649	33.6045	29.5407	26.3149	34.2672	16.1786	34.6446	34.5252	17.7545	25.4614	32.0753	14.7702	19.037	IL6ST	5	55935095	55994993	-	9292	protein_coding	interleukin 6 signal transducer [Source:HGNC Symbol;Acc:HGNC:6021]	-
ENSG00000196139	32.5918	13.3347	34.7486	61.3727	22.8095	26.8336	51.9159	45.9765	22.0863	46.7118	10.5992	9.10353	9.39914	6.25268	13.4834	17.2275	6.12102	14.9595	AKR1C3	10	5035354	5107686	+	4532	protein_coding	aldo-keto reductase family 1 member C3 [Source:HGNC Symbol;Acc:HGNC:386]	-
ENSG00000126756	28.3032	22.4174	33.5059	30.7344	31.6042	23.1646	25.7523	22.9224	22.0491	20.5399	21.3406	27.878	21.2654	19.6627	27.5316	36.9964	16.1029	13.6724	UXT	X	47651798	47659161	-	1243	protein_coding	ubiquitously expressed prefoldin like chaperone [Source:HGNC Symbol;Acc:HGNC:12641]	-
ENSG00000050405	23.2973	39.5236	19.7593	30.5174	39.896	18.9769	23.4374	37.9481	38.8683	16.2179	18.3118	12.8414	13.928	14.9996	18.7342	32.4033	11.6053	34.0774	LIMA1	12	50175788	50283546	-	6317	protein_coding	LIM domain and actin binding 1 [Source:HGNC Symbol;Acc:HGNC:24636]	-
ENSG00000196656	63.9035	27.7228	13.3161	28.8864	11.201	13.7505	29.4933	22.5251	25.8421	11.8142	15.3921	41.8432	6.49157	35.5637	20.1816	45.6583	14.3405	17.1242	AC004057.1	4	113214046	113217170	-	498	transcribed_processed_pseudogene	ribosomal protein S26 (RPS26) pseudogene	-
ENSG00000134287	27.4758	17.5109	25.3504	25.8834	22.5051	25.4668	23.0538	24.792	20.5113	31.4344	28.5033	29.4125	29.4511	23.5016	31.385	13.862	24.9807	19.9593	ARF3	12	48935723	48957551	-	5002	protein_coding	ADP ribosylation factor 3 [Source:HGNC Symbol;Acc:HGNC:654]	-
ENSG00000140391	23.1506	21.2012	20.0442	27.2827	17.3503	20.2136	43.5772	30.7407	21.5459	39.0581	28.2854	21.4411	23.3402	19.9157	28.464	23.1873	17.0832	18.9485	TSPAN3	15	77041404	77083984	-	8506	protein_coding	tetraspanin 3 [Source:HGNC Symbol;Acc:HGNC:17752]	-
ENSG00000027697	30.4042	23.5187	21.4656	27.4157	26.2935	26.9388	36.5236	36.6443	21.2904	23.406	12.376	37.2162	21.8387	20.6859	14.8901	28.4561	11.7564	23.6998	IFNGR1	6	137197484	137219449	-	3277	protein_coding	interferon gamma receptor 1 [Source:HGNC Symbol;Acc:HGNC:5439]	-
ENSG00000122490	27.0484	16.1731	29.7721	27.8047	20.477	70.7396	28.9794	31.0763	50.5721	47.8303	6.7928	11.1098	16.1231	6.50805	7.0305	7.08012	7.81965	31.7797	PQLC1	18	79902420	79951664	-	5225	protein_coding	PQ loop repeat containing 1 [Source:HGNC Symbol;Acc:HGNC:26188]	-
ENSG00000119673	23.3149	7.60788	21.5478	52.3735	5.80271	10.8602	74.7074	26.5086	24.2256	93.0895	17.9379	7.69713	17.2179	10.1394	9.47085	8.49824	12.5871	20.3129	ACOT2	14	73567620	73575658	+	2393	protein_coding	acyl-CoA thioesterase 2 [Source:HGNC Symbol;Acc:HGNC:18431]	-
ENSG00000034713	22.1953	15.0514	27.3928	21.6718	12.4981	22.1622	25.8311	23.8474	17.4774	25.6186	38.4479	26.1541	32.0702	25.2176	40.331	24.6555	24.2911	18.8923	GABARAPL2	16	75566351	75577881	+	3034	protein_coding	GABA type A receptor associated protein like 2 [Source:HGNC Symbol;Acc:HGNC:13291]	-
ENSG00000002330	37.7756	19.1863	36.1042	35.0006	25.0151	46.9515	22.2861	27.7154	21.9066	28.7898	18.1962	19.6074	20.3377	13.6874	22.3605	19.4752	14.7055	14.622	BAD	11	64269830	64284704	-	1708	protein_coding	BCL2 associated agonist of cell death [Source:HGNC Symbol;Acc:HGNC:936]	-
ENSG00000100412	18.6415	8.18452	22.131	30.7459	6.96061	11.0658	62.15	18.5987	29.7239	84.4852	22.567	8.72482	30.8079	18.3637	13.219	7.00502	23.4796	26.6203	ACO2	22	41469125	41528989	+	4041	protein_coding	aconitase 2 [Source:HGNC Symbol;Acc:HGNC:118]	-
ENSG00000172301	28.2247	21.1538	37.4798	24.3561	24.2835	24.1979	39.97	25.6546	22.6755	25.8577	18.1996	19.7811	25.674	13.821	26.7403	27.9388	19.0665	18.1633	COPRS	17	31851864	31859337	-	1432	protein_coding	coordinator of PRMT5 and differentiation stimulator [Source:HGNC Symbol;Acc:HGNC:28848]	-
ENSG00000051523	20.5397	14.3715	15.4155	29.5316	22.2729	20.9146	52.3025	35.3367	9.83246	8.73087	14.2814	71.4671	23.8674	20.8128	21.9451	14.3532	18.4227	28.1975	CYBA	16	88643283	88651152	-	3357	protein_coding	cytochrome b-245 alpha chain [Source:HGNC Symbol;Acc:HGNC:2577]	-
ENSG00000182934	26.5689	20.4009	28.8388	28.1552	21.5748	18.2944	34.1579	30.1099	27.6955	42.578	20.491	21.0074	22.4224	21.3149	22.479	13.4638	18.4559	24.4851	SRPRA	11	126262919	126269144	-	4167	protein_coding	SRP receptor subunit alpha [Source:HGNC Symbol;Acc:HGNC:11307]	-
ENSG00000101150	32.9116	21.9351	27.74	29.6634	23.3876	56.9824	27.6477	22.8461	23.3168	34.302	18.2004	18.966	18.3251	16.1864	20.4049	13.5741	16.4459	19.4392	TPD52L2	20	63865228	63891545	+	4694	protein_coding	tumor protein D52 like 2 [Source:HGNC Symbol;Acc:HGNC:12007]	-
ENSG00000108784	33.279	21.5484	32.2464	31.8272	21.69	43.0917	38.5738	29.9856	28.0647	37.2485	15.542	13.7341	18.9912	10.347	13.182	11.7195	17.903	23.1567	NAGLU	17	42536172	42544449	+	3004	protein_coding	N-acetyl-alpha-glucosaminidase [Source:HGNC Symbol;Acc:HGNC:7632]	-
ENSG00000143553	29.0038	20.1761	35.323	31.4668	16.0652	34.9463	35.4731	21.832	24.4264	39.9234	22.3554	18.5571	15.3134	15.6575	22.0016	27.8646	14.9774	16.254	SNAPIN	1	153658654	153661830	+	1544	protein_coding	SNAP associated protein [Source:HGNC Symbol;Acc:HGNC:17145]	-
ENSG00000126261	36.2119	28.6833	28.2399	34.0336	29.1346	38.313	27.7214	26.1742	29.2519	45.1434	11.7322	14.6447	18.1015	8.23925	12.1169	29.4586	8.73774	15.3453	UBA2	19	34428352	34471251	+	4815	protein_coding	ubiquitin like modifier activating enzyme 2 [Source:HGNC Symbol;Acc:HGNC:30661]	-
ENSG00000172380	15.6336	24.6862	25.714	18.5871	15.9785	20.1368	32.3495	26.4647	25.0354	53.3257	22.2643	21.9766	33.5325	12.8125	17.5947	43.9899	15.3336	15.7312	GNG12	1	67701466	67833467	-	4724	protein_coding	G protein subunit gamma 12 [Source:HGNC Symbol;Acc:HGNC:19663]	-
ENSG00000126934	32.5951	23.5858	32.1716	37.4659	30.4867	47.5701	27.334	29.7149	27.6054	23.9268	16.5648	15.4659	16.8882	15.5172	17.7841	11.2029	14.3817	20.7309	MAP2K2	19	4090321	4124129	-	5236	protein_coding	mitogen-activated protein kinase kinase 2 [Source:HGNC Symbol;Acc:HGNC:6842]	-
ENSG00000162910	33.7476	30.139	30.5936	41.7353	38.8267	36.3959	24.3441	31.7612	30.2641	15.7409	15.0255	13.4656	14.6875	13.2642	19.584	17.7997	13.6782	19.8307	MRPL55	1	228106679	228109312	-	1886	protein_coding	mitochondrial ribosomal protein L55 [Source:HGNC Symbol;Acc:HGNC:16686]	-
ENSG00000086289	25.5991	19.1761	50.68	60.4401	23.2683	43.1529	30.046	16.7244	20.0335	52.6766	12.1493	8.44513	13.7002	4.52971	7.49221	24.8166	7.61642	19.9074	EPDR1	7	37683843	37951941	+	2864	protein_coding	ependymin related 1 [Source:HGNC Symbol;Acc:HGNC:17572]	-
ENSG00000063244	22.2383	21.6541	22.6366	24.4545	23.477	17.2024	24.7399	24.1797	19.9663	26.7458	30.346	28.0096	24.2616	30.7732	31.4702	14.0561	28.4174	25.8011	U2AF2	19	55654146	55674715	+	4115	protein_coding	U2 small nuclear RNA auxiliary factor 2 [Source:HGNC Symbol;Acc:HGNC:23156]	-
ENSG00000128709	28.3636	41.1872	22.9344	20.5019	47.6635	20.4273	2.12847	5.84871	24.2464	5.08019	39.3013	13.2078	25.4231	41.9327	28.0552	19.7281	34.0076	20.2284	HOXD9	2	176122720	176124937	+	1870	protein_coding	homeobox D9 [Source:HGNC Symbol;Acc:HGNC:5140]	Homeobox
ENSG00000117362	18.9644	16.3377	18.2733	19.0497	13.7375	20.6674	28.8289	22.6417	13.2954	27.4781	37.8149	33.7365	34.2038	32.4458	33.3954	17.8903	32.3975	18.8369	APH1A	1	150265399	150269580	-	3473	protein_coding	aph-1 homolog A, gamma-secretase subunit [Source:HGNC Symbol;Acc:HGNC:29509]	-
ENSG00000156709	33.4071	15.3121	27.2761	50.1427	15.2392	21.4618	37.8141	28.3661	26.7625	43.7073	17.6353	12.9438	28.8948	14.6384	12.3122	12.1481	20.6026	21.0045	AIFM1	X	130129362	130165887	-	3306	protein_coding	apoptosis inducing factor mitochondria associated 1 [Source:HGNC Symbol;Acc:HGNC:8768]	-
ENSG00000131507	22.937	16.941	22.85	20.8389	14.0374	16.6677	32.9156	22.0012	17.1304	29.7035	39.6233	27.7581	35.0403	24.9755	33.6933	21.4852	25.9444	14.9148	NDFIP1	5	142108505	142154443	+	6024	protein_coding	Nedd4 family interacting protein 1 [Source:HGNC Symbol;Acc:HGNC:17592]	-
ENSG00000225921	26.9997	21.0962	27.6815	32.3816	19.4092	18.4913	21.943	23.638	19.0082	23.2405	34.8233	24.142	25.2533	22.8387	37.1839	24.6303	20.4228	16.2653	NOL7	6	13615327	13632739	+	1865	protein_coding	nucleolar protein 7 [Source:HGNC Symbol;Acc:HGNC:21040]	-
ENSG00000175130	10.2349	26.4911	27.5773	17.0938	33.4254	8.15806	46.788	44.5333	10.6607	14.8683	16.5426	43.3922	22.0497	24.6532	27.093	27.9089	12.2385	25.5986	MARCKSL1	1	32333832	32336379	-	1699	protein_coding	MARCKS like 1 [Source:HGNC Symbol;Acc:HGNC:7142]	-
ENSG00000104765	19.3296	19.3972	27.4409	22.3876	18.9308	13.7154	55.7995	41.4894	21.6216	42.3094	17.3118	20.7889	18.3527	13.2203	26.9987	30.335	12.7688	17.0704	BNIP3L	8	26382898	26505636	+	4307	protein_coding	BCL2 interacting protein 3 like [Source:HGNC Symbol;Acc:HGNC:1085]	-
ENSG00000105887	17.3584	18.3396	23.4113	17.7953	13.5031	22.4015	35.4773	22.1379	14.0152	39.8215	38.7031	32.0356	29.9226	19.3293	34.3179	27.8424	19.0082	13.7317	MTPN	7	135926761	135977353	-	3775	protein_coding	myotrophin [Source:HGNC Symbol;Acc:HGNC:15667]	-
ENSG00000142186	35.9999	26.4076	31.9432	35.8771	38.4984	40.057	22.7146	27.533	28.5379	26.0305	15.6119	15.6094	16.0617	13.5147	17.6857	13.2454	14.4544	18.7491	SCYL1	11	65525077	65538704	+	4282	protein_coding	SCY1 like pseudokinase 1 [Source:HGNC Symbol;Acc:HGNC:14372]	-
ENSG00000107816	38.5996	29.3216	37.5623	36.0475	40.3887	46.3364	24.6177	23.362	29.0212	27.611	10.2534	11.3601	13.2547	10.0429	10.032	13.2443	12.6001	24.6555	LZTS2	10	100996618	101007836	+	6547	protein_coding	leucine zipper tumor suppressor 2 [Source:HGNC Symbol;Acc:HGNC:29381]	-
ENSG00000139684	28.4863	21.2932	31.1975	25.0594	17.7623	16.6413	27.8074	21.0596	28.415	32.6465	25.7345	20.2683	24.4159	18.4736	20.5235	41.0152	19.0843	17.8924	ESD	13	46771256	46797232	-	3401	protein_coding	esterase D [Source:HGNC Symbol;Acc:HGNC:3465]	-
ENSG00000132646	22.8209	26.7124	28.6496	24.8636	21.3403	12.6195	23.5139	22.0004	18.3885	29.025	28.36	24.2526	22.7956	23.6885	38.7738	35.8472	19.1885	14.6175	PCNA	20	5114953	5126626	-	1471	protein_coding	proliferating cell nuclear antigen [Source:HGNC Symbol;Acc:HGNC:8729]	-
ENSG00000086598	20.6501	14.4056	27.5574	20.0379	11.6359	15.7467	34.1921	19.9162	17.7652	34.9935	33.623	31.8063	31.1314	22.5661	35.5964	27.9095	22.1094	15.6974	TMED2	12	123584531	123598577	+	3830	protein_coding	transmembrane p24 trafficking protein 2 [Source:HGNC Symbol;Acc:HGNC:16996]	-
ENSG00000164054	27.1781	18.0643	28.0247	27.832	19.3776	36.5816	35.0254	31.9642	20.963	30.8192	18.6262	27.4651	22.1261	18.3031	25.945	14.2749	14.0518	20.152	SHISA5	3	48467798	48504826	-	4664	protein_coding	shisa family member 5 [Source:HGNC Symbol;Acc:HGNC:30376]	-
ENSG00000213465	32.2809	20.5537	26.7055	33.8954	26.3391	41.1724	26.2276	26.9942	23.3862	25.1496	23.072	15.8466	18.1283	18.6115	29.3218	15.6427	16.4117	16.719	ARL2	11	65014113	65022184	+	2084	protein_coding	ADP ribosylation factor like GTPase 2 [Source:HGNC Symbol;Acc:HGNC:693]	-
ENSG00000125877	33.683	21.0978	26.1849	37.4174	23.2093	38.4032	28.1246	33.7717	20.8575	24.9947	17.6313	20.1684	17.2015	18.3863	22.2265	17.0485	17.5938	18.1769	ITPA	20	3208868	3223870	+	2071	protein_coding	inosine triphosphatase [Source:HGNC Symbol;Acc:HGNC:6176]	-
ENSG00000118363	27.7833	23.3863	30.3021	28.0799	25.7504	20.5013	22.6533	24.8651	18.8611	22.1737	28.3067	26.4386	27.6978	18.6343	26.8787	31.6824	19.9086	11.7659	SPCS2	11	74949247	74979031	+	2982	protein_coding	signal peptidase complex subunit 2 [Source:HGNC Symbol;Acc:HGNC:28962]	-
ENSG00000213619	31.2828	21.3171	30.684	45.6872	24.0438	31.9222	29.2061	26.2404	27.3388	29.9447	21.0255	12.0655	19.6901	16.1906	17.02	20.16	16.5868	15.137	NDUFS3	11	47565336	47584562	+	3670	protein_coding	NADH:ubiquinone oxidoreductase core subunit S3 [Source:HGNC Symbol;Acc:HGNC:7710]	-
ENSG00000116871	38.7856	18.1907	29.43	30.7289	17.8215	44.296	53.2201	26.57	24.5285	43.4601	10.0033	17.9576	16.0064	10.3741	12.0411	7.67752	8.82978	25.158	MAP7D1	1	36155579	36180849	+	5271	protein_coding	MAP7 domain containing 1 [Source:HGNC Symbol;Acc:HGNC:25514]	-
ENSG00000184602	20.9404	16.3532	33.6451	47.1631	21.4826	25.3837	54.7734	38.9836	21.3173	48.1588	13.2972	8.93188	16.1724	10.6548	13.2155	15.3196	8.22905	20.8561	SNN	16	11668414	11679159	+	3312	protein_coding	stannin [Source:HGNC Symbol;Acc:HGNC:11149]	-
ENSG00000162434	20.7571	17.14	24.0761	19.7541	15.6597	15.4245	35.0629	25.3668	18.4862	47.4061	25.335	34.5701	22.357	21.483	28.0019	23.3358	19.6498	20.9054	JAK1	1	64833229	64966504	-	6317	protein_coding	Janus kinase 1 [Source:HGNC Symbol;Acc:HGNC:6190]	-
ENSG00000115468	13.727	9.31228	8.48818	4.06868	2.74152	10.0831	6.07988	3.62033	2.90874	6.50837	62.5604	35.3726	70.2006	48.2083	74.1599	3.38186	57.9899	15.2283	EFHD1	2	232606057	232682781	+	3052	protein_coding	EF-hand domain family member D1 [Source:HGNC Symbol;Acc:HGNC:29556]	-
ENSG00000054118	24.6243	24.8265	21.0425	23.5117	27.5782	27.0539	28.5626	26.374	26.8967	31.1257	25.0427	22.4316	21.0804	19.1093	19.9693	20.7902	21.265	23.1382	THRAP3	1	36224416	36305357	+	4736	protein_coding	thyroid hormone receptor associated protein 3 [Source:HGNC Symbol;Acc:HGNC:22964]	-
ENSG00000100941	15.9178	39.4242	15.6231	16.8469	26.0051	27.1214	10.3152	26.435	32.6054	8.95548	17.2731	23.2511	20.4756	31.1339	13.3615	48.4933	29.2927	31.2613	PNN	14	39175183	39183218	+	4201	protein_coding	pinin, desmosome associated protein [Source:HGNC Symbol;Acc:HGNC:9162]	-
ENSG00000120438	29.204	19.9966	27.8634	31.7184	23.9701	19.5336	31.7092	25.8306	29.6391	38.3172	18.7841	17.6088	20.1778	16.9597	17.8518	26.6521	17.3768	20.3909	TCP1	6	159778498	159789749	-	4929	protein_coding	t-complex 1 [Source:HGNC Symbol;Acc:HGNC:11655]	-
ENSG00000134202	12.085	10.6998	13.6477	8.85698	8.35776	14.6943	9.6895	7.94672	14.7885	9.5795	111.309	9.94893	30.2662	53.6355	41.2703	14.834	51.8756	9.92563	GSTM3	1	109733932	109741038	-	4750	protein_coding	glutathione S-transferase mu 3 [Source:HGNC Symbol;Acc:HGNC:4635]	-
ENSG00000122033	31.7895	25.1752	27.0637	37.2509	24.5436	24.19	28.537	28.2012	28.3592	20.5066	21.4747	16.4523	17.4387	18.3957	22.0382	24.8309	19.7602	17.3657	MTIF3	13	27435643	27450591	-	1603	protein_coding	mitochondrial translational initiation factor 3 [Source:HGNC Symbol;Acc:HGNC:29788]	-
ENSG00000172053	23.6156	23.7603	25.3143	29.7194	27.6036	29.528	24.5172	24.3983	23.8296	25.4522	21.2841	20.2038	19.9536	24.9786	24.5817	18.4828	23.1044	23.03	QARS	3	49095932	49105135	-	4708	protein_coding	glutaminyl-tRNA synthetase [Source:HGNC Symbol;Acc:HGNC:9751]	-
ENSG00000256235	18.2583	10.3249	15.766	31.8637	6.15464	26.176	57.3875	36.0481	23.1607	69.2069	14.1891	9.19248	12.5793	17.1756	39.4795	12.4976	12.6365	21.1915	SMIM3	5	150777946	150796734	+	2449	protein_coding	small integral membrane protein 3 [Source:HGNC Symbol;Acc:HGNC:30248]	-
ENSG00000132471	30.2555	19.8857	26.976	31.6845	26.126	30.9903	29.25	27.5919	29.4426	31.9923	19.9196	13.6636	22.6009	17.3367	25.9684	9.37884	18.4287	21.6733	WBP2	17	75845699	75856507	-	5399	protein_coding	WW domain binding protein 2 [Source:HGNC Symbol;Acc:HGNC:12738]	-
ENSG00000004534	23.4279	50.2596	18.3755	24.0032	34.9368	38.9354	7.80784	36.3087	32.2462	6.93378	11.4136	12.7144	8.41184	17.8999	8.10009	37.9548	16.1608	46.2729	RBM6	3	49940007	50100045	+	7302	protein_coding	RNA binding motif protein 6 [Source:HGNC Symbol;Acc:HGNC:9903]	-
ENSG00000169908	15.2472	22.4593	8.66784	13.4861	10.0628	15.2276	37.7196	26.1783	10.5094	14.8628	41.3393	27.3271	33.0421	37.179	36.7438	32.9311	24.3308	24.6276	TM4SF1	3	149369022	149377865	-	3668	protein_coding	transmembrane 4 L six family member 1 [Source:HGNC Symbol;Acc:HGNC:11853]	-
ENSG00000168710	19.7097	14.9449	21.9879	23.5697	12.6505	13.5058	34.581	22.7948	21.7207	41.4355	33.9266	19.0856	38.8413	24.5501	27.5783	16.9888	26.2437	17.6437	AHCYL1	1	109984686	110023741	+	5113	protein_coding	adenosylhomocysteinase like 1 [Source:HGNC Symbol;Acc:HGNC:344]	-
ENSG00000141522	25.3709	15.0512	26.3873	23.7951	11.7742	19.2687	42.1945	25.2133	21.7141	35.7554	24.2122	28.4559	26.6829	24.5711	27.7313	6.77645	19.9818	26.6482	ARHGDIA	17	81867721	81871406	-	2903	protein_coding	Rho GDP dissociation inhibitor alpha [Source:HGNC Symbol;Acc:HGNC:678]	-
ENSG00000136732	50.9004	21.1333	31.2481	38.9477	27.9894	23.2879	43.089	40.4619	25.6015	34.6631	11.0047	15.179	11.5403	6.09793	9.95289	18.1625	7.17518	14.8767	GYPC	2	126655933	126696670	+	3812	protein_coding	glycophorin C (Gerbich blood group) [Source:HGNC Symbol;Acc:HGNC:4704]	-
ENSG00000120053	20.4865	10.0572	22.2775	31.4606	11.4667	21.5258	24.7435	22.7414	26.1736	34.2864	33.4527	9.15353	34.7516	34.1177	35.1273	8.59945	31.4076	18.9664	GOT1	10	99396870	99431569	-	3369	protein_coding	glutamic-oxaloacetic transaminase 1 [Source:HGNC Symbol;Acc:HGNC:4432]	-
ENSG00000090861	28.6588	17.6629	31.4426	32.4344	16.0689	18.7274	32.4045	28.8792	28.3596	38.9767	21.183	16.08	20.5469	18.7325	20.0093	13.484	21.3857	24.8636	AARS	16	70252295	70289543	-	4498	protein_coding	alanyl-tRNA synthetase [Source:HGNC Symbol;Acc:HGNC:20]	-
ENSG00000171530	24.7875	21.3167	28.1303	23.9204	16.5333	19.7759	32.3013	31.3636	19.2886	26.812	23.4407	21.8572	24.2525	18.5621	26.49	36.1082	18.4447	16.0549	TBCA	5	77691166	77868780	-	3058	protein_coding	tubulin folding cofactor A [Source:HGNC Symbol;Acc:HGNC:11579]	-
ENSG00000104915	31.364	27.9606	26.8815	31.2077	29.109	41.8947	19.5086	29.7926	20.7669	18.904	17.4081	22.1689	16.6588	17.7748	19.0544	21.622	17.9073	19.2643	STX10	19	13144058	13150383	-	1796	protein_coding	syntaxin 10 [Source:HGNC Symbol;Acc:HGNC:11428]	-
ENSG00000114850	21.4172	29.193	40.6922	21.6165	20.6996	16.5113	35.6568	21.1404	21.5684	32.2439	19.4278	20.8591	21.6454	13.6361	17.7137	47.1538	13.5236	14.5338	SSR3	3	156540140	156555184	-	4627	protein_coding	signal sequence receptor subunit 3 [Source:HGNC Symbol;Acc:HGNC:11325]	-
ENSG00000099875	24.8316	19.072	24.5245	20.6648	24.1639	30.3402	35.9595	22.463	23.4396	39.2964	16.7103	19.1808	28.0215	26.4931	22.33	9.02331	16.4608	26.204	MKNK2	19	2037465	2051244	-	5221	protein_coding	MAP kinase interacting serine/threonine kinase 2 [Source:HGNC Symbol;Acc:HGNC:7111]	-
ENSG00000176720	22.9576	13.6548	20.9634	39.9476	11.9077	43.6406	54.9845	36.309	20.0213	57.2224	8.55092	21.8926	17.0922	7.16986	8.4526	8.44378	12.7235	23.1654	BOK	2	241551424	241574138	+	2711	protein_coding	BOK, BCL2 family apoptosis regulator [Source:HGNC Symbol;Acc:HGNC:1087]	-
ENSG00000079435	5.24887	2.04966	3.35713	40.3147	2.99784	7.54351	185.01	60.6772	10.5633	83.2569	1.58839	1.81371	2.28909	1.39481	3.12749	0.333706	1.36247	16.1702	LIPE	19	42401507	42427426	-	5206	protein_coding	lipase E, hormone sensitive type [Source:HGNC Symbol;Acc:HGNC:6621]	-
ENSG00000172336	39.8894	23.7501	43.5337	37.568	23.4843	24.2165	25.2496	27.3626	24.8453	24.53	17.8207	14.6884	16.3603	13.1755	20.5993	19.2904	17.2103	15.2899	POP7	7	100706053	100707495	+	988	protein_coding	POP7 homolog, ribonuclease P/MRP subunit [Source:HGNC Symbol;Acc:HGNC:19949]	-
ENSG00000130332	31.2367	22.8435	29.382	30.5311	38.4076	31.048	20.6345	27.0859	19.1584	15.64	16.3882	25.8315	17.5456	16.0366	26.9906	27.0828	17.1383	15.7843	LSM7	19	2321517	2328620	-	1698	protein_coding	LSM7 homolog, U6 small nuclear RNA and mRNA degradation associated [Source:HGNC Symbol;Acc:HGNC:20470]	-
ENSG00000160691	28.4514	31.7614	26.2919	30.5836	29.0557	25.4616	36.1768	36.5176	28.3357	34.87	10.5387	17.5683	15.942	11.5434	10.6708	18.2991	10.0924	26.4864	SHC1	1	154962298	154974395	-	4342	protein_coding	SHC adaptor protein 1 [Source:HGNC Symbol;Acc:HGNC:10840]	-
ENSG00000104388	23.7255	18.6221	21.7584	26.091	16.0476	21.6253	44.3501	29.2937	18.7467	35.2082	27.6567	22.072	24.3508	16.3591	26.6193	22.3761	17.5546	16.074	RAB2A	8	60516857	60623627	+	5654	protein_coding	RAB2A, member RAS oncogene family [Source:HGNC Symbol;Acc:HGNC:9763]	-
ENSG00000167283	32.4182	18.9455	36.5038	37.0579	22.1258	25.2242	29.8698	32.6542	21.6512	20.9716	22.5412	14.4683	21.1981	13.956	19.5392	29.9899	15.313	13.3461	ATP5MG	11	118401154	118431496	+	3382	protein_coding	ATP synthase membrane subunit g [Source:HGNC Symbol;Acc:HGNC:14247]	-
ENSG00000116001	23.2706	43.8126	22.1845	21.8038	47.6204	19.6175	8.36612	20.8153	41.3735	8.06346	14.9767	16.7129	11.9351	28.153	12.4052	39.9056	24.3021	21.8041	TIA1	2	70209444	70248660	-	6607	protein_coding	TIA1 cytotoxic granule associated RNA binding protein [Source:HGNC Symbol;Acc:HGNC:11802]	-
ENSG00000157557	27.82	15.9583	18.7209	13.0543	19.5523	18.2243	22.8509	16.7103	24.8565	18.7246	23.2735	35.5505	33.1909	40.962	40.8798	12.9214	15.9544	27.7589	ETS2	21	38805307	38824955	+	4595	protein_coding	ETS proto-oncogene 2, transcription factor [Source:HGNC Symbol;Acc:HGNC:3489]	ETS
ENSG00000115884	0.821731	0.998766	2.7066	1.84976	0.957385	1.97365	3.32149	3.77558	1.57445	2.67258	85.5333	26.3424	53.6552	97.7168	65.908	0.867001	71.6233	4.38845	SDC1	2	20200797	20225433	-	3595	protein_coding	syndecan 1 [Source:HGNC Symbol;Acc:HGNC:10658]	-
ENSG00000172340	15.5789	11.98	21.5411	33.2252	11.0425	8.09012	43.215	21.9268	19.4552	44.5791	30.3092	16.4678	38.5458	23.1271	19.2877	27.0198	22.7031	18.4119	SUCLG2	3	67360460	67654614	-	3090	protein_coding	succinate-CoA ligase GDP-forming beta subunit [Source:HGNC Symbol;Acc:HGNC:11450]	-
ENSG00000109099	28.9228	19.855	35.2774	26.2831	19.9278	23.5321	44.385	32.3783	31.3805	42.0826	7.19477	9.88874	13.8895	11.8868	15.659	25.7067	8.14227	29.4357	PMP22	17	15229777	15265357	-	3222	protein_coding	peripheral myelin protein 22 [Source:HGNC Symbol;Acc:HGNC:9118]	-
ENSG00000197903	11.9828	5.17659	29.7679	21.3719	8.09908	7.36249	38.5503	30.7672	13.7614	25.7843	53.7719	18.6785	13.1435	39.7445	57.1108	13.9475	18.2343	18.3858	HIST1H2BK	6	27146418	27146798	-	381	protein_coding	histone cluster 1 H2B family member k [Source:HGNC Symbol;Acc:HGNC:13954]	-
ENSG00000055211	19.4853	17.8685	27.655	24.3376	13.7672	15.2173	28.7525	27.5203	19.0393	26.5567	31.4662	21.8509	33.0746	25.0508	27.5159	21.6421	26.9901	17.8408	GINM1	6	149566294	149591748	+	2250	protein_coding	glycoprotein integral membrane 1 [Source:HGNC Symbol;Acc:HGNC:21074]	-
ENSG00000242071	24.2237	22.7287	22.3608	40.4085	30.4486	14.317	31.9842	24.7177	12.7194	28.1004	23.605	40.0675	25.6402	6.74378	13.7394	31.7039	18.8628	13.156	RPL7AP6	14	69885340	69886140	-	801	processed_pseudogene	ribosomal protein L7a pseudogene 6 [Source:HGNC Symbol;Acc:HGNC:19785]	-
ENSG00000008394	2.58991	5.18628	6.23924	28.3554	2.03388	1.96278	142.809	117.324	12.0362	69.3938	2.11675	6.91446	7.14822	1.54136	2.06007	3.08363	3.00374	11.2411	MGST1	12	16347142	16609259	+	7440	protein_coding	microsomal glutathione S-transferase 1 [Source:HGNC Symbol;Acc:HGNC:7061]	-
ENSG00000183864	22.4287	19.1318	22.9847	26.8451	20.1748	29.7662	21.0976	28.7257	27.0037	50.8791	16.7303	14.7232	26.7855	29.6019	21.3228	11.6967	12.7921	22.0968	TOB2	22	41433492	41447023	-	4565	protein_coding	transducer of ERBB2, 2 [Source:HGNC Symbol;Acc:HGNC:11980]	-
ENSG00000225663	37.5698	26.385	32.3186	33.418	31.9481	58.7221	25.6226	32.4393	20.8356	21.3098	10.4233	16.1286	12.9805	9.80363	12.8665	15.5647	10.0398	15.5634	MCRIP1	17	81822361	81833302	-	3726	protein_coding	MAPK regulated corepressor interacting protein 1 [Source:HGNC Symbol;Acc:HGNC:28007]	-
ENSG00000132819	35.4943	25.2668	43.84	39.1321	39.745	72.5819	15.2985	17.081	31.3651	31.5703	4.92925	10.9962	11.7762	4.45075	6.36104	12.0226	5.24529	16.6457	RBM38	20	57391407	57409333	+	2686	protein_coding	RNA binding motif protein 38 [Source:HGNC Symbol;Acc:HGNC:15818]	-
ENSG00000168056	24.1226	31.8563	28.7853	20.8944	29.1866	40.6908	21.9547	21.6224	26.6486	27.7118	15.4462	19.9775	17.2474	18.6428	16.1082	9.7449	23.3476	29.2854	LTBP3	11	65538805	65558930	-	10298	protein_coding	latent transforming growth factor beta binding protein 3 [Source:HGNC Symbol;Acc:HGNC:6716]	-
ENSG00000147669	22.8768	18.532	29.5209	23.6365	17.2371	13.3567	30.2743	21.2418	18.9432	28.3293	28.8619	24.5479	26.8594	17.1052	32.5714	38.673	16.7525	13.8131	POLR2K	8	100150584	100154002	+	1711	protein_coding	RNA polymerase II subunit K [Source:HGNC Symbol;Acc:HGNC:9198]	-
ENSG00000143772	29.7431	24.955	33.8066	21.3617	35.5745	68.0686	11.0032	9.79699	39.5368	43.467	12.5978	7.71474	15.4777	9.30718	23.5977	15.8532	5.62742	15.4274	ITPKB	1	226631690	226739323	-	7036	protein_coding	inositol-trisphosphate 3-kinase B [Source:HGNC Symbol;Acc:HGNC:6179]	-
ENSG00000142634	34.2991	27.8332	30.339	33.8609	30.9719	45.4403	25.1616	25.1297	22.9988	23.7789	11.5819	30.8924	15.4276	9.2892	14.4344	12.7387	8.2346	20.3846	EFHD2	1	15409895	15430343	+	2531	protein_coding	EF-hand domain family member D2 [Source:HGNC Symbol;Acc:HGNC:28670]	-
ENSG00000149923	29.9106	23.9539	31.4186	30.2299	27.6087	24.2923	28.522	28.8439	22.4462	21.9541	18.912	19.4627	17.157	19.7092	24.8872	17.3249	16.2237	19.7399	PPP4C	16	30075978	30085377	+	2734	protein_coding	protein phosphatase 4 catalytic subunit [Source:HGNC Symbol;Acc:HGNC:9319]	-
[truncated: 57,306 more rows]
